# Supplementary material for: Interrupted borrowing hydrogen strategy enabled aminomethylation and direct cross-dehydrogenative coupling strategy enabled dicarbonylation reactions of imidazo[1,5-a]pyridines
Source: Royal Society of Chemistry journal article supplement (doi:10.1039/d4cc06272h), 2025-01-01
Supplement: d4cc06272h1.pdf [file d4cc06272h1.pdf]

## Supporting Information

# Interrupted Borrowing Hydrogen Strategy Enabled Aminomethylation and Direct-Cross Dehydrogenative Coupling Strategy Enabled Dicarboxylation Reactions of Imidazo[1,5-*a*]pyridines

Shivangani Mahajan,<sup>a,b</sup> Debojyoti Bag<sup>‡, a,b,c</sup>, Harpreet Kour<sup>‡, a,b</sup> and Sanghapal D. Sawant<sup>a,b,c\*</sup>

<sup>a</sup>Natural Products and Medicinal Chemistry Division, CSIR-Indian Institute of Integrative Medicine, Canal Road, Jammu & Kashmir, 180001, India

<sup>b</sup>Academy of Scientific and Innovative Research (AcSIR), Ghaziabad, 201002, India

<sup>c</sup>Organic Chemistry Division, CSIR-National Chemical Laboratory, Pune, 411008, India

<sup>‡</sup>These authors have contributed equally

Email: [sd.sawant@ncl.res.in](mailto:sd.sawant@ncl.res.in)

### Table of Contents

| S. No. | Details                                   | Page No. |
|--------|-------------------------------------------|----------|
| 1      | General Methods                           | S2       |
| 2      | General Reaction Procedures               | S2       |
| 3      | Characterization Data                     | S4       |
| 4      | Copies of NMR, HRMS, GC-MS, MS-MS Spectra | S22      |

## 1. General Methods:

All reactions were performed in an oven-dried glass apparatus. Solvents were distilled in the standard way, and commercial reagents were used without any purification. Analytical TLC was performed on 60 F254 plates, and visualized by exposure to ultraviolet light (UV-254 nm). Column chromatography was carried out with silica (100-200 mesh). NMR spectra for the characterization of compounds were recorded on Bruker Advance DPX FT-NMR 400 MHz instrument ( $^1\text{H}$ ) at 400 MHz and ( $^{13}\text{C}$ ) at 101 MHz, respectively.  $^{19}\text{F}$  NMR was recorded at 377 MHz. Chemical shifts ( $\delta$ ) are reported in ppm, using the residual solvent peak in  $\text{CDCl}_3$  ( $\delta_{\text{H}} = 7.26$  and  $\delta_{\text{C}} = 77.16$  ppm) and  $\text{DMSO-d}_6$  ( $\delta_{\text{H}} = 2.50$  and  $\delta_{\text{C}} = 39.52$  ppm) as an internal reference and coupling constants ( $J$ ) are given in hertz (Hz). The following abbreviations were used to explain the multiplicities: s = singlet, d = doublet, t = triplet, q = quartet, and m = multiplet. High-Resolution Mass Spectra (HRMS) were recorded using a Waters XEVO-G2-XS-Q-TOF mass spectrometer.

## 2. General Reaction Procedures:

### General Procedure for the Synthesis of aminomethylated-[1,5-*a*]pyridins (GP1):

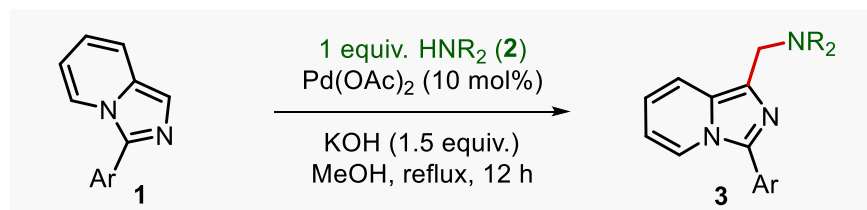

To the solution of 3-arylimidazo[1,5-*a*]pyridines **1** (1 equiv.) and secondary amines **2** (1 equiv.) in methanol was added  $\text{KOH}$  (1.5 equiv.). The mixture was allowed to stir at reflux temperature for 12 hours. After complete conversion (product monitored by TLC), methanol was removed by using a rotary evaporator. The crude residue was dissolved in dichloromethane. The organic layer was washed with water twice. The combined organic layers were dried over anhydrous sodium sulfate. After removal of the solvent in vacuo the residue was subjected to silica gel column chromatography by using  $\text{EtOAc}/n\text{-Hexane}$  mixture as eluent.

### General Procedure for the Synthesis of ethane-1,2-diones from aryl glyoxals (GP2):

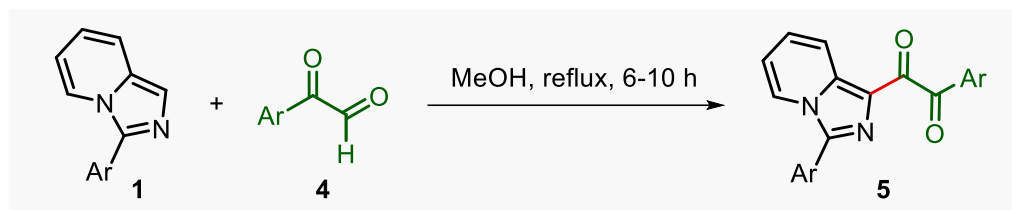

To the solution of 3-arylimidazo[1,5-*a*]pyridines **1** (1 equiv) in methanol, arylglyoxals **4** (1 equiv) was added. The mixture was then allowed to stir at reflux temperature. After complete conversion (product monitored by TLC), methanol was removed using a rotary evaporator. The residue was subjected to silica gel column chromatography using the EtOAc/*n*-hexane mixture as an eluent.

### General Procedure for the Synthesis of propane-1,2-diones (GP3):

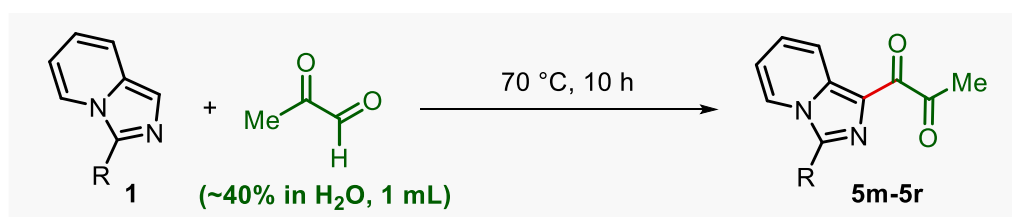

A mixture of the corresponding imidazo[1,5-*a*]pyridine (**1**) and pyruvaldehyde solution (40 wt% in water, 1 mL) was heated at 70 °C. After complete conversion (product monitored by TLC), the reaction was cooled down to room temperature. Dichloromethane was added. The phases were separated, and the aqueous phase was extracted with dichloromethane. The combined organic layers were dried with anhydrous sodium sulfate. After the removal of the solvents in vacuo, the residue was subjected to silica gel column chromatography using the EtOAc/*n*-hexane mixture as an eluent.

### General Procedure for the Synthesis of oximes (GP4):

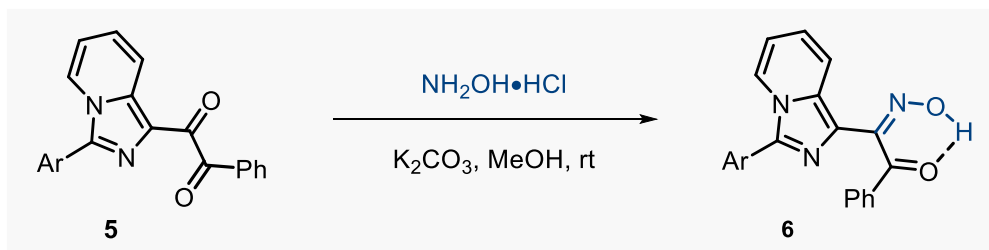

To the solution of 3-arylimidazo[1,5-*a*]pyridines (1 equiv) in methanol (1 mL), hydroxylamine hydrochloride (1.5 equiv) and K<sub>2</sub>CO<sub>3</sub> (1 equiv) were added. The mixture was allowed to stir at room temperature until completion. After complete conversion (product monitored by TLC), methanol was removed using a rotary evaporator. The residue was dissolved in dichloromethane. Water was added. The phases were separated, and the aqueous phase was extracted with dichloromethane. The combined organic layers were dried with anhydrous sodium sulfate. After removal of the solvents in vacuo, the residue was subjected to silica gel column chromatography using the EtOAc/*n*-hexane mixture as an eluent.

### 3. Characterization Data:

#### 4-((3-phenylimidazo[1,5-*a*]pyridin-1-yl)methyl)thiomorpholine (**3a**)

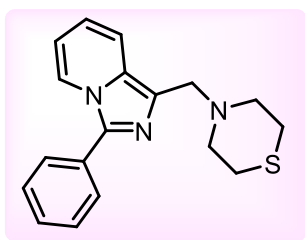

Following GP1, the compound **3a** was obtained as yellow colored solid (68 mg, 85%), m.p.= 110-112 °C; <sup>1</sup>H NMR (400 MHz, CDCl<sub>3</sub>): δ 8.17 (d, *J* = 7.35 Hz, 1H), 7.74 (d, *J* = 7.09 Hz, 2H), 7.55 (d, *J* = 9.19 Hz, 1H), 7.48 (t, *J* = 7.69 Hz, 2H), 7.39 (t, *J* = 7.40 Hz, 1H), 6.70-6.66 (m, 1H), 6.53-6.50 (m, 1H), 3.88 (s, 2H), 2.83-2.81 (m, 4H), 2.69-2.67 (m, 4H) ppm; <sup>13</sup>C{<sup>1</sup>H} NMR (101 MHz, CDCl<sub>3</sub>): δ 137.2, 130.2, 129.7, 128.9, 128.6, 128.4, 128.1, 121.4, 118.4, 113.1, 56.1, 54.8, 28.0 ppm; HRMS (ESI) *m/z*: calcd. for C<sub>18</sub>H<sub>19</sub>N<sub>3</sub>SNa [M+Na]<sup>+</sup>: 332.1197, found: 332.1184; HRMS (ESI) *m/z*: calcd. for C<sub>14</sub>H<sub>11</sub>N<sub>2</sub> [M-C<sub>4</sub>H<sub>8</sub>NS]: 207.0922, found: 207.0923

#### 4-((3-(benzo[*d*][1,3]dioxol-5-yl)imidazo[1,5-*a*]pyridin-1-yl)methyl)thiomorpholine (**3b**)

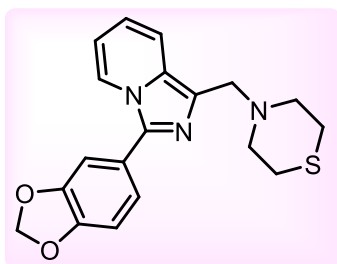

Following GP1, the compound **3b** was obtained as yellow solid (60 mg, 81%), m.p.= 180-182 °C; <sup>1</sup>H NMR (400 MHz, CDCl<sub>3</sub>): δ 8.12 (d, *J* = 7.25 Hz, 1H), 7.56 (d, *J* = 9.21 Hz, 1H), 7.21 (s, 2H), 6.93 (d, *J* = 8.25 Hz, 1H), 6.72-6.68 (m, 1H), 6.53 (t, *J* = 6.80 Hz, 1H), 6.03 (s, 2H), 3.96 (s, 2H), 2.92-2.91 (m, 4H), 2.75-2.73 (m, 4H) ppm; <sup>13</sup>C{<sup>1</sup>H} NMR (101 MHz, CDCl<sub>3</sub>): δ 148.2 (2C), 137.3, 130.1, 126.1, 123.7, 122.2, 121.5,

118.9, 118.3, 113.2, 108.8, 101.5, 55.1, 54.2, 27.3 ppm; **HRMS (ESI) m/z**: calcd. for  $C_{15}H_{11}N_2O_2$  [M-C<sub>4</sub>H<sub>8</sub>NS]: 251.0821, found: 251.0812

#### 4-((3-(3-fluorophenyl)imidazo[1,5-a]pyridin-1-yl)methyl)thiomorpholine (3c)

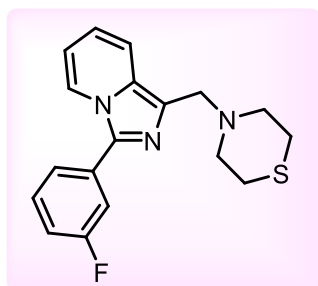

Following GP1, the compound **3c** was obtained as dark colored solid (63 mg, 82%), m.p.= 126-128 °C; **<sup>1</sup>H NMR (400 MHz, CDCl<sub>3</sub>)**: δ 7.68-7.65 (m, 2H), 7.53 (dd, *J* = 9.18, 1.07 Hz, 1H), 7.40-7.35 (m, 1H), 7.25-7.20 (m, 1H), 7.18-7.13 (m, 1H), 6.70-6.66 (m, 1H), 6.52-6.49 (m, 1H), 3.85 (d, *J* = 0.84 Hz, 2H), 2.79-2.77 (m, 4H), 2.65-2.62 (m, 4H) ppm; **<sup>13</sup>C[<sup>1</sup>H] NMR (101 MHz, CDCl<sub>3</sub>)**: δ 160.9, 158.4, 132.2, 132.2 (d, *J* = 3.08 Hz), 130.7 (d, *J* = 8.21 Hz), 129.8, 128.5, 124.6 (d, *J* = 3.18 Hz), 122.1 (d, *J* = 6.82 Hz), 118.5, 117.9, 117.8, 115.9 (d, *J* = 21.48 Hz), 112.7, 55.9, 54.6, 27.7 ppm; **<sup>19</sup>F NMR (377 MHz, CDCl<sub>3</sub>)**: -110.97 to -110.99 (m) ppm; **HRMS (ESI) m/z**: calcd. for  $C_{14}H_{10}N_2F$  [M-C<sub>4</sub>H<sub>8</sub>NS]: 225.0828, found: 225.0827

#### 4-((3-(2-fluorophenyl)imidazo[1,5-a]pyridin-1-yl)methyl)thiomorpholine (3d)

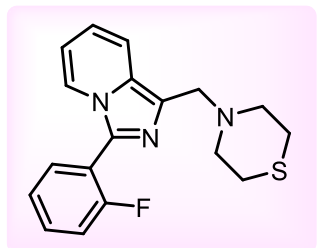

Following GP1, the compound **3d** was obtained as dark colored semi-solid (60 mg, 78%); **<sup>1</sup>H NMR (400 MHz, CDCl<sub>3</sub>)**: δ 8.20 (d, *J* = 7.29 Hz, 1H), 7.61-7.55 (m, 2H), 7.51-7.43 (m, 2H), 7.12-7.08 (m, 1H), 6.75-6.71 (m, 1H), 6.60-6.57 (m, 1H), 3.89 (s, 2H), 2.85-2.82 (m, 4H), 2.71-2.68 (m, 4H) ppm; **<sup>13</sup>C[<sup>1</sup>H] NMR (101 MHz, CDCl<sub>3</sub>)**: δ 164.2, 161.8, 135.9 (d, *J* = 2.81 Hz), 132.1 (d, *J* = 8.36 Hz), 130.6 (d, *J* = 8.57 Hz), 130.3, 127.8, 123.5 (d, *J* = 2.83 Hz), 121.3, 119.0, 118.4, 115.6 (d, *J* = 21.09 Hz), 115.0 (d, *J* = 22.90 Hz), 113.6, 55.6, 55.5, 27.6 ppm; **<sup>19</sup>F NMR (377 MHz, CDCl<sub>3</sub>)**: -111.86 to -111.92 (m) ppm; **HRMS (ESI) m/z**: calcd. for  $C_{18}H_{18}N_3FS$  [M+H]<sup>+</sup>: 328.1284, found: 328.1273; **HRMS (ESI) m/z**: calcd. for  $C_{14}H_{10}N_2F$  [M-C<sub>4</sub>H<sub>8</sub>NS]: 225.0828, found: 225.0825

#### 4-((3-(3-nitrophenyl)imidazo[1,5-a]pyridin-1-yl)methyl)thiomorpholine (3e)

Following GP1, the compound **3e** was obtained as yellow solid (57 mg, 77%), m.p.= 170-

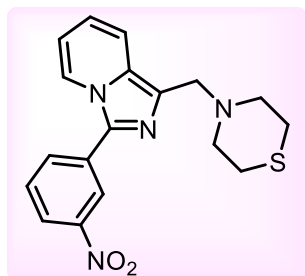

172 °C; <sup>1</sup>H NMR (400 MHz, CDCl<sub>3</sub>): δ 8.67 (t, J = 1.84 Hz, 1H), 7.28-7.24 (m, 2H), 8.19-8.17 (m, 1H), 7.72-7.65 (m, 2H), 6.83-6.79 (m, 1H), 6.69 (dt, J = 6.81, 1.23 Hz, 1H), 3.91 (s, 2H), 2.85-2.83 (m, 4H), 2.73-2.70 (m, 4H) ppm; <sup>13</sup>C{<sup>1</sup>H} NMR (101 MHz, CDCl<sub>3</sub>): δ 148.7, 134.6, 133.9, 132.0, 130.6, 130.2, 129.9, 123.0, 122.2, 120.9, 119.3, 118.9, 114.3, 56.3, 55.0, 28.1 ppm; HRMS (ESI) m/z: calcd.

for C<sub>18</sub>H<sub>19</sub>N<sub>4</sub>O<sub>2</sub>S [M+H]<sup>+</sup>: 355.1229, found: 355.1207; HRMS (ESI) m/z: calcd. for C<sub>14</sub>H<sub>10</sub>N<sub>3</sub>O<sub>2</sub> [M-C<sub>4</sub>H<sub>8</sub>NS]: 252.0773, found: 252.0770

#### 4-((3-(4-isopropylphenyl)imidazo[1,5-a]pyridin-1-yl)methyl)thiomorpholine (3f)

Following GP1, the compound **3f** was obtained as pale yellow semi-solid (59 mg, 80%);

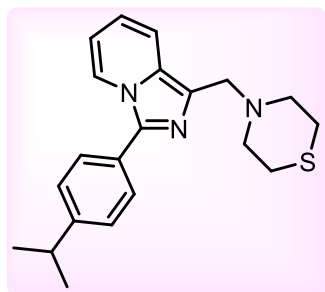

<sup>1</sup>H NMR (400 MHz, CDCl<sub>3</sub>): δ 8.20 (d, J = 7.19 Hz, 1H), 7.69 (d, J = 8.32 Hz, 2H), 7.57 (d, J = 8.99 Hz, 1H), 7.36 (d, J = 7.99 Hz, 2H), 6.71-6.67 (m, 1H), 6.54-6.50 (m, 1H), 3.92 (s, 2H), 3.01-2.94 (m, 1H), 2.88-2.85 (m, 4H), 2.73-2.70 (m, 4H), 1.30 (s, 3H), 1.29 (s, 3H) ppm; <sup>13</sup>C{<sup>1</sup>H} NMR (101 MHz, CDCl<sub>3</sub>): δ 149.7, 137.6, 129.7, 128.2, 127.7, 127.6, 127.1, 126.8, 121.6, 118.5, 118.4, 112.9, 56.2,

54.8, 34.1, 28.0, 24.0 ppm; HRMS (ESI) m/z: calcd. for C<sub>21</sub>H<sub>26</sub>N<sub>3</sub>S [M+H]<sup>+</sup>: 352.1847, found: 352.1827; HRMS (ESI) m/z: calcd. for C<sub>17</sub>H<sub>17</sub>N<sub>2</sub> [M-C<sub>4</sub>H<sub>8</sub>NS]: 249.1392, found: 249.1368

#### 4-((3-(4-methoxyphenyl)imidazo[1,5-a]pyridin-1-yl)methyl)thiomorpholine (3g)

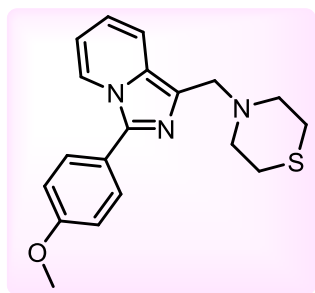

Following GP1, the compound **3g** was obtained as dark colored semi-solid (62 mg, 82%); <sup>1</sup>H NMR (400 MHz, CDCl<sub>3</sub>): δ 8.11 (d, J = 7.27 Hz, 1H), 7.68 (d, J = 8.66 Hz, 2H), 7.54 (d, J = 9.14 Hz, 1H), 7.02 (d, J = 8.74 Hz, 2H), 6.68-6.64 (m, 1H), 6.52-6.48 (m, 1H), 3.88 (s, 2H), 3.86 (s, 3H), 2.85-2.82 (m, 4H), 2.71-2.68 (m, 4H) ppm;

<sup>13</sup>C{<sup>1</sup>H} NMR (101 MHz, CDCl<sub>3</sub>): δ 159.9, 137.4, 130.1, 129.6, 127.4, 122.6, 121.4, 118.3, 118.4, 114.4, 112.9, 56.0, 55.4, 54.7, 27.8 ppm; HRMS (ESI) m/z: calcd. for C<sub>19</sub>H<sub>22</sub>N<sub>3</sub>OS

[M+H]<sup>+</sup>: 340.1484, found: 340.1465; **HRMS (ESI) m/z**: calcd. for C<sub>15</sub>H<sub>13</sub>N<sub>2</sub>O [M-C<sub>4</sub>H<sub>8</sub>NS]: 237.1028, found: 237.1024

#### 4-((3-(3,5-dibromophenyl)imidazo[1,5-a]pyridin-1-yl)methyl)thiomorpholine (3h)

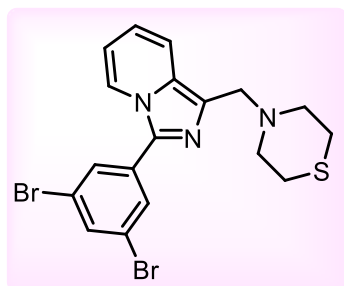

Following GP1, the compound **3h** was obtained as pale white solid (50 mg, 75%), m.p.= 108-110 °C; **<sup>1</sup>H NMR (400 MHz, CDCl<sub>3</sub>)**: δ 8.19 (d, *J* = 7.15 Hz, 1H), 7.89 (d, *J* = 1.71 Hz, 2H), 7.70-7.69 (m, 1H), 7.62 (d, *J* = 9.09 Hz, 1H), 6.78 (t, *J* = 7.88 Hz, 1H), 6.66 (t, *J* = 6.70 Hz, 1H), 3.88 (s, 2H), 2.82-2.81 (m, 4H), 2.71-2.69 (m, 4H) ppm; **<sup>13</sup>C{<sup>1</sup>H} NMR (101 MHz, CDCl<sub>3</sub>)**: δ 134.1, 133.8, 133.5, 130.6, 129.3, 123.5, 121.1, 119.3, 118.7, 114.1, 56.1, 54.9, 28.0 ppm; **HRMS (ESI) m/z**: calcd. for C<sub>14</sub>H<sub>9</sub>N<sub>2</sub>Br<sub>2</sub> [M-C<sub>4</sub>H<sub>8</sub>NS]: 362.9132, found: 362.9135

#### 4-((3-(pyridin-2-yl)imidazo[1,5-a]pyridin-1-yl)methyl)morpholine (3i)

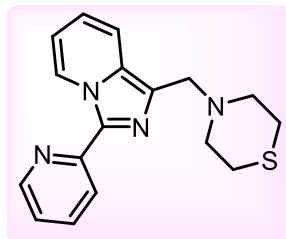

Following GP1, the compound **3i** was obtained as pale white solid (65 mg, 82%), m.p.= 118-120 °C; **<sup>1</sup>H NMR (400 MHz, CDCl<sub>3</sub>)**: δ 9.88 (d, *J* = 7.31 Hz, 1H), 8.60-8.59 (m, 1H), 8.32 (d, *J* = 8.12 Hz, 1H), 7.73 (dt, *J* = 7.70, 1.71 Hz, 1H), 7.62 (m, *J* = 9.08 Hz, 1H), 7.17-7.13 (m, 1H), 6.83-6.79 (m, 1H), 6.71-6.67 (m, 1H), 3.89 (s, 2H), 2.82-2.80 (m, 4H), 2.69-2.67 (m, 4H) ppm; **<sup>13</sup>C{<sup>1</sup>H} NMR (101 MHz, CDCl<sub>3</sub>)**: δ 151.0, 148.1, 136.4, 134.3, 131.1, 129.0, 125.9, 121.9, 121.5, 119.7, 117.7, 113.5, 56.3, 54.9, 28.0 ppm; **HRMS (ESI) m/z**: calcd. for C<sub>17</sub>H<sub>18</sub>N<sub>4</sub>SNa [M+Na]<sup>+</sup>: 333.1150, found: 333.1133; **HRMS (ESI) m/z**: calcd. for C<sub>13</sub>H<sub>10</sub>N<sub>3</sub> [M-C<sub>4</sub>H<sub>8</sub>NS]: 208.0875, found: 208.0875

#### 4-((3-(pyridin-2-yl)imidazo[1,5-a]pyridin-1-yl)methyl)morpholine (3j)

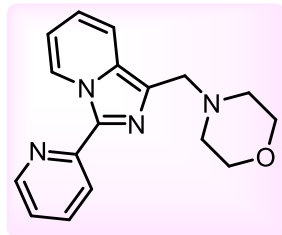

Following GP1, the compound **3j** was obtained as pale yellow solid (82 mg, 81%), m.p.= 122-124 °C; **<sup>1</sup>H NMR (400 MHz, CDCl<sub>3</sub>)**: δ 9.89 (d, *J* = 7.32 Hz, 1H), 8.60 (d, *J* = 4.82 Hz, 1H), 8.34 (d, *J* = 8.17 Hz, 1H), 7.76-7.72 (m, 1H), 7.65 (d, *J* = 9.17 Hz, 1H), 7.18-7.15 (m, 1H),

6.85-6.81 (m, 1H), 6.70 (t,  $J = 6.86$  Hz, 1H), 3.88 (s, 2H), 3.72 (t,  $J = 4.64$  Hz, 4H), 2.57 (m, 4H) ppm;  $^{13}\text{C}\{^1\text{H}\}$  NMR (101 MHz,  $\text{CDCl}_3$ ):  $\delta$  151.0, 148.1, 136.4, 134.4, 131.1, 128.9, 126.0, 122.0, 121.5, 119.8, 117.6, 113.5, 67.0, 55.8, 53.7 ppm; HRMS (ESI)  $m/z$ : calcd. for  $\text{C}_{17}\text{H}_{18}\text{N}_4\text{ONa}$   $[\text{M}+\text{Na}]^+$ : 317.1378, found: 317.1360; HRMS (ESI)  $m/z$ : calcd. for  $\text{C}_{13}\text{H}_{10}\text{N}_3$   $[\text{M}-\text{C}_4\text{H}_8\text{NO}]$ : 208.0875, found: 208.0881

#### 4-((3-(3,5-dibromophenyl)imidazo[1,5-a]pyridin-1-yl)methyl)morpholine (3k)

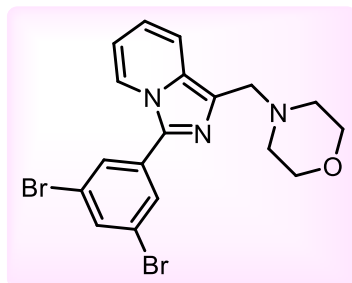

Following GP1, the compound **3k** was obtained as pale white solid (49 mg, 75%), m.p.= 114-116 °C;  $^1\text{H}$  NMR (400 MHz,  $\text{CDCl}_3$ ):  $\delta$  8.20 (d,  $J = 7.20$  Hz, 1H), 7.89 (d,  $J = 1.67$  Hz, 2H), 7.71-7.67 (m, 2H), 6.83-6.79 (m, 1H), 6.68 (t,  $J = 6.76$  Hz, 1H), 3.94 (s, 2H), 3.77 (t,  $J = 4.40$  Hz, 4H), 2.66 (s, 4H) ppm;  $^{13}\text{C}\{^1\text{H}\}$  NMR (101 MHz,  $\text{CDCl}_3$ ):  $\delta$  134.3, 133.9, 133.5, 130.8, 129.3, 127.8, 123.6, 121.2, 119.5, 118.6, 114.2, 66.7, 55.3, 53.4 ppm; HRMS (ESI)  $m/z$ : calcd. for  $\text{C}_{18}\text{H}_{18}\text{N}_3\text{Br}_2\text{O}$   $[\text{M}+\text{H}]^+$ : 449.9817, found: 449.9807; HRMS (ESI)  $m/z$ : calcd. for  $\text{C}_{14}\text{H}_9\text{N}_2\text{Br}_2$   $[\text{M}-\text{C}_4\text{H}_8\text{NO}]$ : 362.9132, found: 362.9124

#### 4-((3-(benzo[d][1,3]dioxol-5-yl)imidazo[1,5-a]pyridin-1-yl)methyl)morpholine (3l)

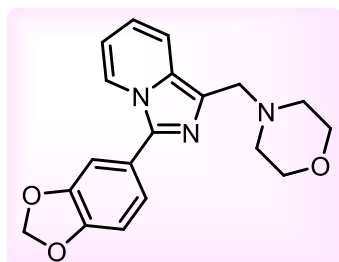

Following GP1, the compound **3l** was obtained as yellow solid (59 mg, 83%), m.p.= 188-190 °C;  $^1\text{H}$  NMR (400 MHz,  $\text{CDCl}_3$ ):  $\delta$  8.11 (d,  $J = 7.31$  Hz, 1H), 7.54 (tt,  $J = 9.18, 1.05$  Hz, 1H), 7.22-7.20 (m, 2H), 6.92-6.89 (m, 1H), 6.69-6.65 (m, 1H), 6.52-6.48 (m, 1H), 6.01-6.00 (m, 2H), 3.86 (s, 2H), 3.71 (s, 4H), 2.59 (s, 4H) ppm;  $^{13}\text{C}\{^1\text{H}\}$  NMR (101 MHz,  $\text{CDCl}_3$ ):  $\delta$  148.1, 148.0, 137.1, 129.6, 127.2, 123.9, 122.0, 121.3, 118.4, 118.2, 113.0, 108.7 (d,  $J = 3.04$  Hz), 101.4, 66.7, 55.3, 53.3 ppm; HRMS (ESI)  $m/z$ : calcd. for  $\text{C}_{19}\text{H}_{20}\text{N}_3\text{O}_3$   $[\text{M}+\text{H}]^+$ : 338.1505, found: 338.1490; HRMS (ESI)  $m/z$ : calcd. for  $\text{C}_{15}\text{H}_{11}\text{N}_2\text{O}_2$   $[\text{M}-\text{C}_4\text{H}_8\text{NO}]$ : 251.0821, found: 251.0824



#### 4-((3-(3-methoxyphenyl)imidazo[1,5-a]pyridin-1-yl)methyl)morpholine (3m)

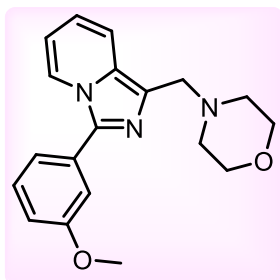

Following GP1, the compound **3m** was obtained as dark colored semi-solid (57 mg, 79%);  $^1\text{H NMR}$  (400 MHz,  $\text{CDCl}_3$ ):  $\delta$  8.20 (d,  $J = 7.27$  Hz, 1H), 7.58 (dd,  $J = 9.21, 1.15$  Hz, 1H), 7.39 (dt,  $J = 7.82, 1.25$  Hz, 1H), 7.33-7.29 (m, 2H), 6.94 (dd,  $J = 8.20, 1.05$  Hz, 1H), 6.72-6.68 (m, 1H), 6.54-6.50 (m, 1H), 3.89 (s, 2H), 3.85 (d,  $J = 1.70$  Hz, 3H), 3.74-3.71 (m, 4H), 2.61 (s, 4H) ppm;  $^{13}\text{C}\{^1\text{H}\}$  NMR (101 MHz,  $\text{CDCl}_3$ ):  $\delta$  160.1, 137.2, 131.3, 130.0, 127.6, 121.6, 120.2, 118.7, 118.4, 113.6, 113.1, 66.7, 55.5, 55.3, 53.3 ppm; HRMS (ESI)  $m/z$ : calcd. for  $\text{C}_{19}\text{H}_{22}\text{N}_3\text{O}_2$   $[\text{M}+\text{H}]^+$ : 324.1712, found: 334.1693; HRMS (ESI)  $m/z$ : calcd. for  $\text{C}_{15}\text{H}_{13}\text{N}_2\text{O}$   $[\text{M}-\text{C}_4\text{H}_8\text{NO}]$ : 237.1028, found: 237.1033

#### 4-((3-phenylimidazo[1,5-a]pyridin-1-yl)methyl)thiomorpholine 1,1-dioxide (3n)

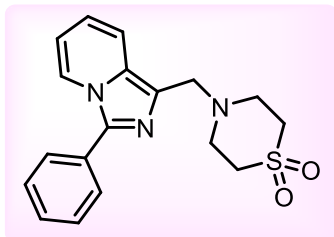

Following GP1, the compound **3n** was obtained as pale white solid (70 mg, 80%), m.p.= 132-134 °C;  $^1\text{H NMR}$  (400 MHz,  $\text{CDCl}_3$ ):  $\delta$  8.09-8.06 (m, 1H), 7.64-7.62 (m, 2H), 7.40-7.32 (m, 3H), 7.30-7.27 (m, 1H), 6.62-6.58 (m, 1H), 6.45-6.41 (m, 1H), 3.87 (d,  $J = 11.62$  Hz, 2H), 2.97 (s, 4H), 2.95 (m, 4H) ppm;  $^{13}\text{C}\{^1\text{H}\}$  NMR (101 MHz,  $\text{CDCl}_3$ ):  $\delta$  137.1, 129.6, 129.4, 128.7, 128.4, 127.7, 127.3, 121.2, 118.8, 117.5, 113.0, 53.5, 51.0, 50.2 ppm; HRMS (ESI)  $m/z$ : calcd. for  $\text{C}_{18}\text{H}_{19}\text{N}_3\text{O}_2\text{SNa}$   $[\text{M}+\text{Na}]^+$ : 364.1096, found: 364.1080; HRMS (ESI)  $m/z$ : calcd. for  $\text{C}_{14}\text{H}_{11}\text{N}_2$   $[\text{M}-\text{C}_4\text{H}_8\text{NO}_2\text{S}]$ : 207.0922, found: 207.0922

#### 3-phenyl-1-(piperidin-1-ylmethyl)imidazo[1,5-a]pyridine (3o)

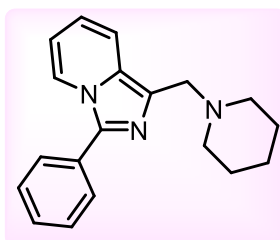

Following GP1, the compound **3o** was obtained as pale yellow colored semi-solid (56 mg, 75%);  $^1\text{H NMR}$  (400 MHz,  $\text{CDCl}_3$ ):  $\delta$  8.19 (d,  $J = 7.33$  Hz, 1H), 7.78-7.76 (m, 2H), 7.62 (d,  $J = 9.21$  Hz, 1H), 7.50 (t,  $J = 7.50$  Hz, 2H), 7.43-7.39 (m, 1H), 6.71-6.67 (m, 1H), 6.54-6.51 (m, 1H), 3.89 (s, 2H), 2.58 (s, 4H), 1.65-1.59 (m, 4H), 1.42 (s, 2H) ppm;  $^{13}\text{C}\{^1\text{H}\}$  NMR

(101 MHz, CDCl<sub>3</sub>):  $\delta$  137.2, 130.3, 129.9, 129.4, 128.9, 128.6, 128.4, 128.1, 121.3, 118.8, 118.4, 113.1, 55.8, 54.3, 25.7, 24.1 ppm; HRMS (ESI) m/z: calcd. for C<sub>19</sub>H<sub>22</sub>N<sub>3</sub> [M+H]<sup>+</sup>: 292.1814, found: 292.1786; HRMS (ESI) m/z: calcd. for C<sub>14</sub>H<sub>11</sub>N<sub>2</sub> [M-C<sub>5</sub>H<sub>10</sub>N]: 207.0922, found: 207.0908

### 3-phenyl-1-((4-phenylpiperidin-1-yl)methyl)imidazo[1,5-a]pyridine (3p)

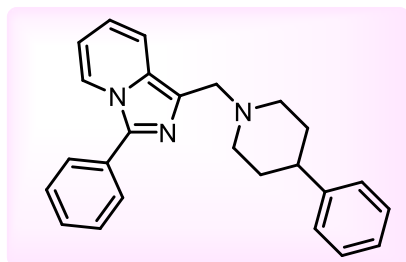

Following GP1, the compound **3p** was obtained as dark colored semi-solid (76 mg, 80%); <sup>1</sup>H NMR (400 MHz, CDCl<sub>3</sub>):  $\delta$  8.13 (d, *J* = 7.27 Hz, 1H), 7.73-7.71 (m, 2H), 7.56 (td, *J* = 9.24, 1.10 Hz, 1H), 7.45-7.41 (m, 2H), 7.36-7.32 (m, 1H), 7.22-7.18 (m, 2H), 7.16-7.13 (m, 2H), 7.12-7.08 (m, 1H), 6.65-6.61 (m, 1H), 6.48-6.44 (m, 1H), 3.88 (s, 2H), 3.57 (s, 1H), 3.11 (d, *J* = 11.72 Hz, 2H), 2.46-2.39 (m, 1H), 2.21-2.14 (m, 2H), 1.78-1.75 (m, 3H) ppm; <sup>13</sup>C{<sup>1</sup>H} NMR (101 MHz, CDCl<sub>3</sub>):  $\delta$  146.5, 137.2, 130.3, 129.8, 129.0, 128.6, 128.4, 128.2, 127.0, 126.1, 121.4, 118.7, 118.4, 113.1, 70.6, 55.5, 55.4, 42.6, 33.4 ppm; HRMS (ESI) m/z: calcd. for C<sub>25</sub>H<sub>26</sub>N<sub>3</sub> [M+H]<sup>+</sup>: 368.2127, found: 368.2110; HRMS (ESI) m/z: calcd. for C<sub>14</sub>H<sub>11</sub>N<sub>2</sub> [M-C<sub>11</sub>H<sub>14</sub>N]: 207.0922, found: 207.0925

### 3-(3-fluorophenyl)-1-((4-phenylpiperidin-1-yl)methyl)imidazo[1,5-a]pyridine (3q)

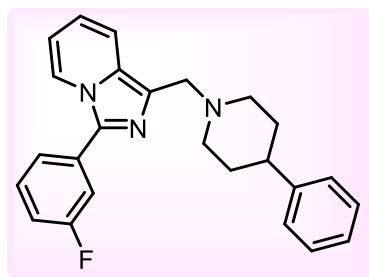

Following GP1, the compound **3q** was obtained as dark colored semi-solid (71 mg, 78%); <sup>1</sup>H NMR (400 MHz, CDCl<sub>3</sub>):  $\delta$  7.72-7.67 (m, 2H), 7.60 (d, *J* = 9.12 Hz, 1H), 7.40-7.36 (m, 1H), 7.22 (t, *J* = 7.45 Hz, 3H), 7.19-7.16 (m, 3H), 7.14-7.10 (m, 1H), 6.72-6.69 (m, 1H), 6.52 (t, *J* = 6.70 Hz, 1H), 3.93 (s, 2H), 3.15 (d, *J* = 11.60 Hz, 2H), 2.50-2.41 (m, 1H), 2.21 (dt, *J* = 11.10, 3.51 Hz, 2H), 1.84-1.77 (m, 4H) ppm; <sup>13</sup>C{<sup>1</sup>H} NMR (101 MHz, CDCl<sub>3</sub>):  $\delta$  161.1, 158.6, 146.3, 132.5, 132.4 (d, *J* = 3.19 Hz), 130.8 (d, *J* = 8.12 Hz), 130.1, 128.7, 128.3, 126.8, 126.1, 124.8 (d, *J* = 3.45 Hz), 122.3 (d, *J* = 6.89 Hz), 118.7, 118.1 (t, *J* = 7.09 Hz), 116.0 (d, *J* = 21.19 Hz), 112.8, 55.2, 54.0, 42.4, 33.2 ppm; <sup>19</sup>F NMR (377 MHz, CDCl<sub>3</sub>): -110.91 to -110.95 (m) ppm; HRMS (ESI)

**m/z:** calcd. for C<sub>25</sub>H<sub>25</sub>N<sub>3</sub>F [M+H]<sup>+</sup>: 386.2030, found: 386.2014; **HRMS (ESI) m/z:** calcd. for C<sub>14</sub>H<sub>10</sub>N<sub>2</sub>F [M-C<sub>11</sub>H<sub>14</sub>N]: 225.0828, found: 225.0838

**3-(2-fluorophenyl)-1-((4-phenylpiperidin-1-yl)methyl)imidazo[1,5-a]pyridine (3r)**

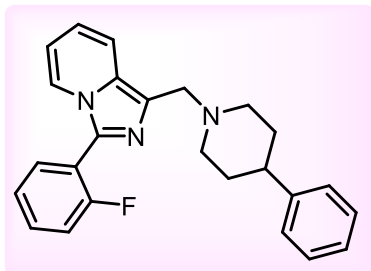

Following GP1, the compound **3r** was obtained as dark colored semi-solid (68 mg, 75%); **<sup>1</sup>H NMR (400 MHz, CDCl<sub>3</sub>):** δ 8.18 (d, *J* = 7.19 Hz, 1H), 7.63 (d, *J* = 9.22 Hz, 1H), 7.56-7.54 (m, 1H), 7.50-7.46 (m, 1H), 7.46-7.40 (m, 2H), 7.24-7.22 (m, 2H), 7.19-7.17 (m, 1H), 7.16-7.12 (m, 1H), 7.09-7.04 (m, 1H), 6.73-6.69 (m, 1H), 6.57-6.53 (m, 1H), 3.92 (s, 2H), 3.15 (d, *J* = 11.50 Hz, 2H), 2.51-2.43 (m, 1H), 2.22 (dt, *J* = 11.16, 3.30 Hz, 2H), 1.85-1.79 (m, 4H) ppm; **<sup>13</sup>C{<sup>1</sup>H} NMR (101 MHz, CDCl<sub>3</sub>):** δ 164.3, 161.9, 146.0, 136.0, 132.4 (d, *J* = 8.49 Hz), 130.6 (d, *J* = 8.42 Hz), 130.3, 128.5, 127.0, 126.2, 123.5 (d, *J* = 2.92 Hz), 121.3, 118.8 (d, *J* = 4.48 Hz), 115.5 (d, *J* = 21.14 Hz), 115.1 (d, *J* = 22.90 Hz), 113.6, 55.5, 54.2, 42.6, 33.3 ppm; **<sup>19</sup>F NMR (377 MHz, CDCl<sub>3</sub>):** -110.91 to -110.95 (m) ppm; **HRMS (ESI) m/z:** calcd. for C<sub>25</sub>H<sub>25</sub>N<sub>3</sub>F [M+H]<sup>+</sup>: 386.2033, found: 386.2015; **HRMS (ESI) m/z:** calcd. for C<sub>14</sub>H<sub>10</sub>N<sub>2</sub>F [M-C<sub>11</sub>H<sub>14</sub>N]: 225.0828, found: 225.0824

**tert-butyl (1-((3-phenylimidazo[1,5-a]pyridin-1-yl)methyl)piperidin-4-yl)carbamate (3s)**

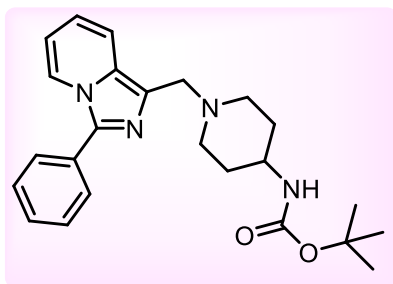

Following GP1, the compound **3s** was obtained as dark colored solid (80 mg, 76%), m.p. = 144-146 °C; **<sup>1</sup>H NMR (400 MHz, CDCl<sub>3</sub>):** δ 9.89 (d, *J* = 7.32 Hz, 1H), 8.61 (d, *J* = 4.82 Hz, 1H), 8.33 (d, *J* = 8.17 Hz, 1H), 7.74 (dt, *J* = 7.76, 1.71 Hz, 1H), 7.64 (d, *J* = 9.17 Hz, 1H), 7.18-7.15 (m, 1H), 6.86-6.82 (m, 1H), 6.71 (t, *J* = 6.86 Hz, 1H), 3.87 (s, 2H), 3.72 (t, *J* = 4.64 Hz, 4H), 2.56 (m, 4H) ppm; **<sup>13</sup>C{<sup>1</sup>H} NMR (101 MHz, CDCl<sub>3</sub>):** δ 151.0, 148.1, 136.4, 134.4, 131.1, 128.9, 126.0, 122.0, 121.5, 119.8, 117.6, 113.5, 67.0, 55.8, 53.7 ppm; **HRMS (ESI) m/z:** calcd. for C<sub>24</sub>H<sub>31</sub>N<sub>4</sub>O<sub>2</sub> [M+H]<sup>+</sup>: 407.2447, found: 407.2435; **HRMS (ESI) m/z:** calcd. for C<sub>14</sub>H<sub>11</sub>N<sub>2</sub> [M-C<sub>10</sub>H<sub>19</sub>N<sub>2</sub>O<sub>2</sub>]: 207.0922, found: 207.0929

*N*-ethyl-*N*-((3-phenylimidazo[1,5-*a*]pyridin-1-yl)methyl)ethanamine (**3t**)

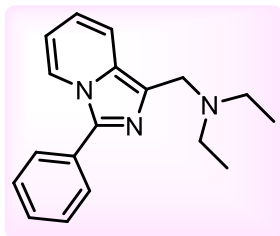

Following GP1, the compound **3t** was obtained as pale yellow semi-solid (60 mg, 83%);  $^1\text{H NMR}$  (400 MHz,  $\text{CDCl}_3$ ):  $\delta$  8.21 (d,  $J = 7.17$  Hz, 1H), 7.88 (d,  $J = 8.91$  Hz, 1H), 7.73 (d,  $J = 7.17$  Hz, 2H), 7.52 (t,  $J = 7.51$  Hz, 2H), 7.47-7.43 (m, 1H), 6.90-6.86 (m, 1H), 6.62 (t,  $J = 6.16$  Hz, 1H), 4.68 (s, 2H), 3.20 (d,  $J = 6.42$  Hz, 4H), 1.50 (t,  $J = 6.88$  Hz, 6H) ppm;  $^{13}\text{C}\{^1\text{H}\}$  NMR (101 MHz,  $\text{CDCl}_3$ ):  $\delta$  138.5, 132.3, 129.7, 129.2, 128.2, 121.6, 121.0, 120.6, 118.1, 113.8, 46.8, 9.9 ppm; HRMS (ESI)  $m/z$ : calcd. for  $\text{C}_{14}\text{H}_{11}\text{N}_2$  [ $\text{M}-\text{C}_4\text{H}_{10}\text{N}$ ]: 207.0922, found: 207.0922

4,4'-(imidazo[1,5-*a*]pyridine-1,3-diylbis(methylene))bis(thiomorpholine) (**3u**)

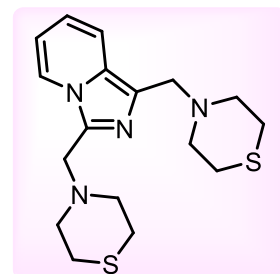

To the solution of imidazo[1,5-*a*]pyridine (0.42 mmol, 1 equiv.) in methanol, 0.84 mmol (2 equiv.) of thiomorpholine was added, followed by the addition of base KOH (0.84 mmol). The mixture was allowed to stir at reflux temperature for 12 hours. After complete conversion (product monitored by TLC), methanol was removed by using a rotary evaporator. The crude residue was dissolved in dichloromethane. The organic layer was washed with water twice. The combined organic layers were dried over anhydrous sodium sulfate. After removal of the solvent in vacuo the residue was subjected to silica gel column chromatography by using EtOAc/*n*-Hexane mixture as eluent. The compound **3u** was obtained as yellow semi-solid (120 mg, 82%);  $^1\text{H NMR}$  (400 MHz,  $\text{CDCl}_3$ ):  $\delta$  8.05 (d,  $J = 7.21$  Hz, 1H), 7.42 (dd,  $J = 9.20, 0.66$  Hz, 1H), 6.65-6.61 (m, 1H), 6.46 (t,  $J = 6.80$  Hz, 1H), 3.86 (s, 2H), 3.73 (s, 2H), 2.71-2.69 (m, 4H), 2.65-2.59 (m, 8H), 2.57-2.55 (m, 4H) ppm;  $^{13}\text{C}\{^1\text{H}\}$  NMR (101 MHz,  $\text{CDCl}_3$ ):  $\delta$  133.3, 129.4, 124.8, 122.0, 118.3, 117.3, 111.8, 55.4, 55.0, 54.3, 54.0, 27.5, 27.1 ppm; HRMS (ESI)  $m/z$ : calcd. for  $\text{C}_{17}\text{H}_{24}\text{N}_4\text{S}_2\text{Na}$  [ $\text{M}+\text{Na}$ ] $^+$ : 371.1340, found: 371.1312; HRMS (ESI)  $m/z$ : calcd. for  $\text{C}_{13}\text{H}_{16}\text{N}_3\text{S}$  [ $\text{M}-\text{C}_4\text{H}_8\text{NS}$ ]: 246.1065, found: 246.1082

#### 4-((3-phenylimidazo[1,5-a]pyridin-1-yl)methyl-*d*<sub>2</sub>)thiomorpholine (3v)

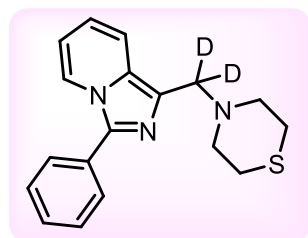

The compound **3v** was obtained as yellow semi-solid (52 mg, 65%); <sup>1</sup>H NMR (400 MHz, CDCl<sub>3</sub>): δ 8.15 (d, *J* = 7.32 Hz, 1H), 7.73 (d, *J* = 8.10, 2H), 7.53 (d, *J* = 9.21 Hz, 1H), 7.46 (t, *J* = 7.57 Hz, 2H), 7.38-7.35 (m, 1H), 6.65 (t, *J* = 7.80 Hz, 1H), 6.48 (t, *J* = 6.40 Hz, 1H), 2.80-2.79 (m, 4H), 2.66-2.66 (m, 4H) ppm; <sup>13</sup>C{<sup>1</sup>H} NMR (101 MHz, CDCl<sub>3</sub>): δ 136.8, 129.9, 129.4, 128.6, 128.3, 128.1, 127.7, 121.1, 118.1 (2C), 112.8, 54.5, 53.1, 27.7 ppm.

**NOTE-** During the HRMS analysis, it was observed that the molecular ion peak was undergoing fragmentation in the standard positive ESI mode. In some instances, the molecular ion peak was completely absent. Adjusting the temperature did not resolve this issue. To verify that the observed fragmented peak originated from the main molecular ion, Tandem Mass Spectroscopy (MS/MS) of **3s** was conducted. The results of the MS/MS analysis confirmed that the fragmented peak corresponded to the main molecular ion peak. This validation through MS/MS provided a clear confirmation of the initial observations.

#### 1-Phenyl-2-(3-phenylimidazo[1,5-a]pyridin-1-yl)ethane-1,2-dione (5a)

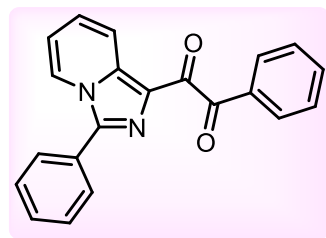

Following GP2, the compound **5a** was obtained as yellow colored solid (69 mg, 82%), m.p.= 160-162 °C; <sup>1</sup>H NMR (400 MHz, CDCl<sub>3</sub>): δ 8.46 (d, *J* = 9.06 Hz, 1H), 8.37 (td, *J* = 7.07, 1.05 Hz, 1H), 8.05 (d, *J* = 7.85 Hz, 2H), 7.69-7.67 (m, 2H), 7.60-7.56 (m, 1H), 7.48-7.44 (m, 5H), 7.38-7.33 (m, 1H), 6.97-6.93 (m, 1H) ppm; <sup>13</sup>C{<sup>1</sup>H} NMR (101 MHz, CDCl<sub>3</sub>): δ 194.9, 189.0, 140.5, 136.6, 134.2, 133.6, 130.1, 129.9, 129.1, 128.9, 128.7, 128.5, 127.6 (2C), 123.2, 120.3, 116.0 ppm; HRMS (ESI) *m/z*: calcd. for C<sub>21</sub>H<sub>15</sub>N<sub>2</sub>O<sub>2</sub> [M+H]<sup>+</sup>: 327.1134, found: 327.1133

**1-(3-(benzo[d][1,3]dioxol-5-yl)imidazo[1,5-a]pyridin-1-yl)-2-phenylethane-1,2-dione (5b)**

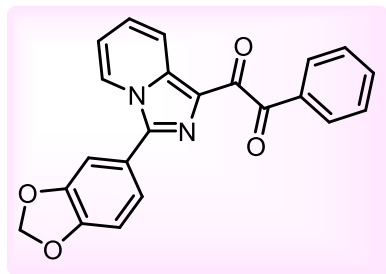

Following GP2, the compound **5b** was obtained as yellow solid (60 mg, 77%), m.p.= 186-188 °C; <sup>1</sup>H NMR (400 MHz, CDCl<sub>3</sub>): δ 8.48 (d, *J* = 9.15 Hz, 1H), 8.36 (d, *J* = 7.08 Hz, 1H), 8.07-8.05 (m, 2H), 7.60 (t, *J* = 7.41 Hz, 1H), 7.47 (t, *J* = 7.85 Hz, 2H), 7.39-7.35 (m, 1H), 7.19 (dd, *J* = 7.93, 1.64 Hz, 1H), 7.15 (d, *J* = 1.55 Hz, 1H), 6.96 (t, *J* = 6.85 Hz, 1H), 6.91 (d, *J* = 8.02 Hz, 1H), 6.02 (s, 2H) ppm; <sup>13</sup>C{<sup>1</sup>H} NMR (101 MHz, CDCl<sub>3</sub>): δ 194.9, 189.0, 149.1, 148.4, 140.3, 136.6, 134.2, 133.7, 130.2, 128.8, 127.4, 123.2, 123.1, 122.2, 120.5, 115.9, 109.5, 108.9, 101.7 ppm; HRMS (ESI) *m/z*: calcd. for C<sub>22</sub>H<sub>15</sub>N<sub>2</sub>O<sub>4</sub> [M+H]<sup>+</sup>: 371.1032, found: 371.1016

**1-(3-(4-isopropylphenyl)imidazo[1,5-a]pyridin-1-yl)-2-phenylethane-1,2-dione (5c)**

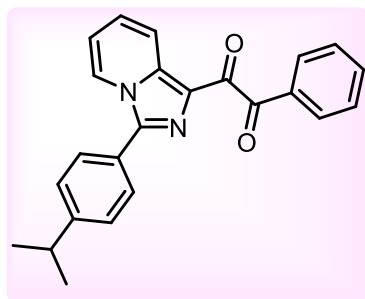

Following GP2, the compound **5c** was obtained as yellow solid (58 mg, 74%), m.p.= 154-156 °C; <sup>1</sup>H NMR (400 MHz, CDCl<sub>3</sub>): δ 8.50 (d, *J* = 9.05 Hz, 1H), 8.40 (d, *J* = 7.17 Hz, 1H), 8.08-8.05 (m, 2H), 7.63 (d, *J* = 8.20 Hz, 2H), 7.59 (d, *J* = 7.51 Hz, 1H), 7.47 (t, *J* = 7.85 Hz, 2H), 7.40-7.34 (m, 3H), 6.95 (t, *J* = 6.86 Hz, 1H), 3.00-2.93 (m, 1H), 1.28 (s, 3H), 1.26 (s, 3H) ppm; <sup>13</sup>C{<sup>1</sup>H} NMR (101 MHz, CDCl<sub>3</sub>): δ 195.0, 189.1, 151.1, 136.7, 134.2, 133.7, 130.2, 129.0, 128.8, 127.4, 127.3, 123.4, 120.5, 115.8, 34.2, 23.9 ppm; HRMS (ESI) *m/z*: calcd. for C<sub>24</sub>H<sub>21</sub>N<sub>2</sub>O<sub>2</sub> [M+H]<sup>+</sup>: 369.1603, found: 369.1611

**1-(3-(3-fluorophenyl)imidazo[1,5-a]pyridin-1-yl)-2-phenylethane-1,2-dione (5d)**

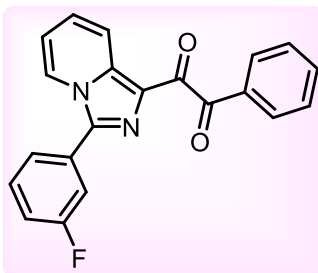

Following GP2, the compound **5d** was obtained as yellow solid (62 mg, 76%), m.p.= 175-177 °C; <sup>1</sup>H NMR (400 MHz, CDCl<sub>3</sub>): δ 8.51 (d, *J* = 9.01 Hz, 1H), 8.08-8.05 (m, 2H), 7.98-7.95 (m, 1H), 7.67 (dt, *J* = 7.44, 1.47 Hz, 1H), 7.61-7.57 (m, 1H), 7.49-7.45 (m, 3H), 7.44-7.40 (m, 1H), 7.27 (dt, *J* = 7.61, 1.06 Hz, 1H), 7.24-7.19 (m,

1H), 7.00 (dt,  $J = 6.88, 1.23$  Hz, 1H) ppm;  $^{13}\text{C}\{^1\text{H}\}$  NMR (101 MHz,  $\text{CDCl}_3$ ):  $\delta$  194.8, 188.8, 161.4, 158.9, 136.6, 136.1, 134.2, 133.5, 132.9, 132.3 (d,  $J = 3.32$  Hz), 130.1, 128.7, 128.3 (d,  $J = 14.74$  Hz), 127.9 (d,  $J = 7.79$  Hz), 127.6 (d,  $J = 8.42$  Hz), 125.1 (d,  $J = 3.37$  Hz), 123.9 (d,  $J = 6.53$  Hz), 119.9, 116.5 (d,  $J = 14.34$  Hz), 116.2, 115.9 (d,  $J = 13.81$  Hz) ppm;  $^{19}\text{F}$  NMR (377 MHz,  $\text{CDCl}_3$ ): -110.65 to -110.73 (m) ppm; HRMS (ESI)  $m/z$ : calcd. for  $\text{C}_{21}\text{H}_{14}\text{N}_2\text{O}_2\text{F}$   $[\text{M}+\text{H}]^+$ : 345.1039, found: 345.1047

### 1-(3-(3-methoxyphenyl)imidazo[1,5-a]pyridin-1-yl)-2-phenylethane-1,2-dione (5e)

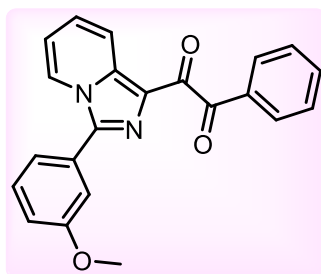

Following GP2, the compound **5e** was obtained as yellow solid (59 mg, 75%), m.p. = 148-150 °C;  $^1\text{H}$  NMR (400 MHz,  $\text{CDCl}_3$ ):  $\delta$  8.50 (d,  $J = 9.05$  Hz, 1H), 8.41 (td,  $J = 7.13, 0.97$  Hz, 1H), 8.08-8.05 (m, 2H), 7.62-7.58 (m, 1H), 7.47 (t,  $J = 7.63$  Hz, 2H), 7.42-7.36 (m, 2H), 7.28 (t,  $J = 1.27$  Hz, 1H), 7.24-7.23 (m, 1H), 7.02-6.99 (m, 1H), 6.96 (dt,  $J = 6.86, 0.98$  Hz, 1H), 3.83 (s, 3H) ppm;  $^{13}\text{C}\{^1\text{H}\}$  NMR (101 MHz,  $\text{CDCl}_3$ ):  $\delta$  194.8, 189.0, 160.2, 140.4, 136.8, 134.2, 133.7, 130.2, 129.8, 128.8, 128.5, 127.7, 127.5, 123.4, 120.9, 120.5, 115.9 (d,  $J = 3.03$  Hz), 114.6, 55.6 ppm; HRMS (ESI)  $m/z$ : calcd. for  $\text{C}_{22}\text{H}_{17}\text{N}_2\text{O}_3$   $[\text{M}+\text{H}]^+$ : 357.1239, found: 357.1233

### 1-phenyl-2-(3-(pyridin-2-yl)imidazo[1,5-a]pyridin-1-yl)ethane-1,2-dione (5f)

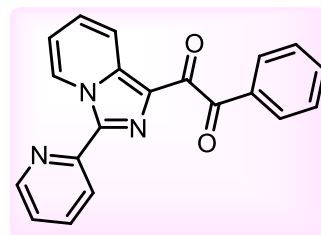

Following GP2, the compound **5f** was obtained as yellow solid (67 mg, 80%), m.p. = 167-169 °C;  $^1\text{H}$  NMR (400 MHz,  $\text{CDCl}_3$ ):  $\delta$  10.21 (dd,  $J = 7.12, 0.93$  Hz, 1H), 8.61 (d,  $J = 4.14$  Hz, 1H), 8.53 (d,  $J = 8.28$  Hz, 1H), 8.26 (d,  $J = 8.10$  Hz, 1H), 8.09-8.06 (m, 2H), 7.74-7.69 (m, 1H), 7.63-7.59 (m, 1H), 7.51-7.44 (m, 3H), 7.26-7.23 (m, 1H), 7.08 (t,  $J = 6.94$  Hz, 1H) ppm;  $^{13}\text{C}\{^1\text{H}\}$  NMR (101 MHz,  $\text{CDCl}_3$ ):  $\delta$  195.0, 189.0, 149.9, 148.1, 137.5, 137.2, 136.8, 134.2, 133.8, 130.1, 128.8, 128.3, 128.1, 127.4, 123.3, 123.2, 119.6, 116.2 ppm; HRMS (ESI)  $m/z$ : calcd. for  $\text{C}_{20}\text{H}_{14}\text{N}_3\text{O}_2$   $[\text{M}+\text{H}]^+$ : 328.1086, found: 328.1076



**1-(4-bromophenyl)-2-(3-(4-isopropylphenyl)imidazo[1,5-a]pyridin-1-yl)ethane-1,2-dione (5g)**

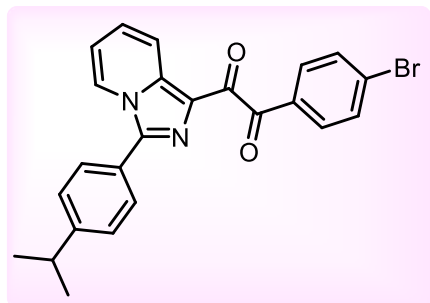

Following GP2, the compound **5g** was obtained as yellow solid (80 mg, 85%), m.p.= 130-132 °C;  $^1\text{H NMR}$  (400 MHz,  $\text{CDCl}_3$ ):  $\delta$  8.50 (d,  $J = 9.08$  Hz, 1H), 8.41 (d,  $J = 7.26$  Hz, 1H), 7.93 (d,  $J = 7.40$  Hz, 2H), 7.64-7.61 (m, 4H), 7.42-7.39 (m, 1H), 7.36 (d,  $J = 8.31$  Hz, 2H), 7.27-7.26 (m, 1H), 6.97 (t,  $J = 6.88$  Hz, 1H), 3.00-2.93 (m, 1H), 1.28 (s, 3H), 1.26 (s, 3H) ppm;  $^{13}\text{C}\{^1\text{H}\}$  NMR (101 MHz,  $\text{CDCl}_3$ ):  $\delta$  193.9, 188.3, 146.3, 151.2, 140.9, 136.8, 132.5, 132.1, 131.6, 129.6, 129.0, 127.7, 127.5, 127.4, 125.9, 123.4, 120.4, 115.9, 34.2, 23.9 ppm; HRMS (ESI)  $m/z$ : calcd. for  $\text{C}_{24}\text{H}_{20}\text{N}_2\text{O}_2\text{Br}$   $[\text{M}+\text{H}]^+$ : 447.0708, found: 447.0697

**1-(3-(benzo[d][1,3]dioxol-5-yl)imidazo[1,5-a]pyridin-1-yl)-2-(3-nitrophenyl)ethane-1,2-dione (5h)**

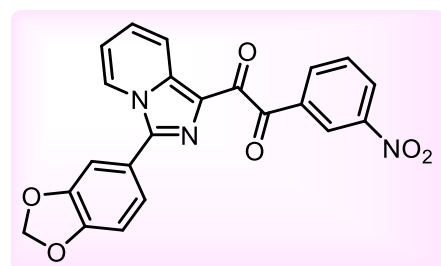

Following GP2, the compound **5h** was obtained as yellow solid (70 mg, 80%), m.p.= 188-190 °C;  $^1\text{H NMR}$  (400 MHz,  $\text{CDCl}_3$ ):  $\delta$  8.85 (s, 1H), 8.53 (d,  $J = 8.71$  Hz, 1H), 8.46 (d,  $J = 7.99$  Hz, 1H), 8.41 (t,  $J = 6.94$  Hz, 2H), 7.71 (t,  $J = 7.86$  Hz, 1H), 7.46 (t,  $J = 7.74$  Hz, 1H), 7.19 (d,  $J = 7.61$  Hz, 1H), 7.14 (s, 1H), 7.03 (t,  $J = 6.55$  Hz, 1H), 6.93 (d,  $J = 7.97$  Hz, 1H), 6.04 (s, 2H) ppm;  $^{13}\text{C}\{^1\text{H}\}$  NMR (101 MHz,  $\text{CDCl}_3$ ):  $\delta$  192.4, 187.0, 149.3, 148.5, 140.6, 137.1, 135.4, 135.1, 130.1, 128.3, 128.2, 127.1, 125.0, 123.5, 123.1, 121.9, 120.5, 116.3, 109.4, 109.0, 101.8 ppm; HRMS (ESI)  $m/z$ : calcd. for  $\text{C}_{22}\text{H}_{14}\text{N}_3\text{O}_6$   $[\text{M}+\text{H}]^+$ : 416.0883, found: 416.0890



**1-(3-(benzo[d][1,3]dioxol-5-yl)imidazo[1,5-a]pyridin-1-yl)-2-(4-(methylsulfonyl)phenyl)ethane-1,2-dione (5i)**

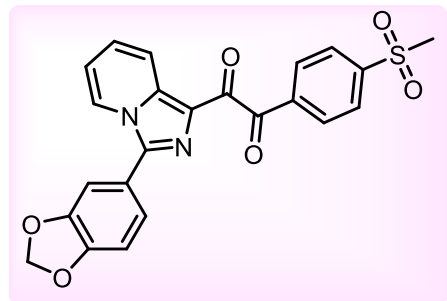

Following GP2, the compound **5i** was obtained as yellow solid (81 mg, 86%), m.p.= 180-182 °C; **<sup>1</sup>H NMR (400 MHz, CDCl<sub>3</sub>):** δ 8.51 (d, *J* = 8.98 Hz, 1H), 8.39 (td, *J* = 7.09, 0.95 Hz, 1H), 8.24 (td, *J* = 8.56, 1.77 Hz, 2H), 8.07-8.05 (m, 2H), 7.46-7.42 (m, 1H), 7.18 (dd, *J* = 8.01, 1.72 Hz, 1H), 7.14 (d, *J* = 1.66 Hz, 1H), 7.02 (dt, *J* = 6.89, 1.09 Hz, 1H), 6.93 (d, *J* = 8.04 Hz, 1H), 6.04 (s, 2H), 3.08 (s, 3H) ppm; **<sup>13</sup>C{<sup>1</sup>H} NMR (101 MHz, CDCl<sub>3</sub>):** δ 193.3, 187.4, 149.3, 148.5, 144.8, 140.6, 137.7, 137.0, 130.9, 128.1, 127.9, 127.1, 123.5, 123.1, 121.9, 120.4, 116.3, 109.4, 109.0, 101.8, 44.5 ppm; **HRMS (ESI) m/z:** calcd. for C<sub>23</sub>H<sub>17</sub>N<sub>2</sub>O<sub>6</sub>S [M+H]<sup>+</sup>: 449.0807, found: 449.0796

**1-(3-(3-fluorophenyl)imidazo[1,5-a]pyridin-1-yl)-2-(3-nitrophenyl)ethane-1,2-dione (5j)**

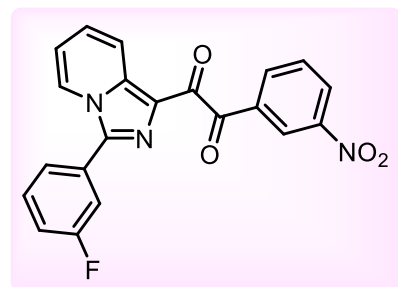

Following GP2, the compound **5j** was obtained as yellow solid (72 mg, 78%), m.p.= 157-159 °C; **<sup>1</sup>H NMR (400 MHz, CDCl<sub>3</sub>):** δ 8.85 (t, *J* = 1.77 Hz, 1H), 8.56 (d, *J* = 9.01 Hz, 1H), 8.48-8.41 (m, 3H), 7.71 (t, *J* = 7.88 Hz, 1H), 7.52-7.50 (m, 2H), 7.49-7.47 (m, 1H), 7.45-7.42 (m, 1H), 7.22-7.18 (m, 1H), 7.07 (dt, *J* = 6.88, 1.16 Hz, 1H) ppm; **<sup>13</sup>C{<sup>1</sup>H} NMR (101 MHz, CDCl<sub>3</sub>):** δ 192.2, 187.1, 164.3, 161.8, 148.5, 139.4 (d, *J* = 2.92 Hz), 137.2, 135.4, 135.0, 131.0 (d, *J* = 8.43 Hz), 130.3 (d, *J* = 8.22 Hz), 130.1, 128.4 (d, *J* = 4.73 Hz), 127.4, 125.0, 124.4 (d, *J* = 3.08 Hz), 123.3, 120.5, 117.3 (d, *J* = 21.17 Hz), 116.7, 116.1 (d, *J* = 23.44 Hz) ppm; **<sup>19</sup>F NMR (377 MHz, CDCl<sub>3</sub>):** -110.77 to -110.83 (m) ppm; **HRMS (ESI) m/z:** calcd. for C<sub>21</sub>H<sub>13</sub>N<sub>3</sub>O<sub>4</sub>F [M+H]<sup>+</sup>: 390.0890, found: 390.0892

**1-(3-(3-methoxyphenyl)imidazo[1,5-a]pyridin-1-yl)-2-(3-nitrophenyl)ethane-1,2-dione (5k)**

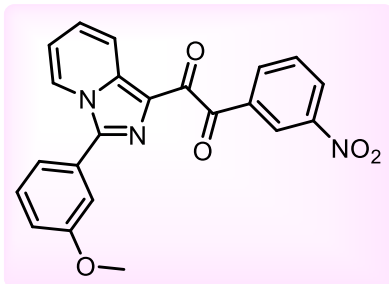

Following GP2, the compound **5k** was obtained as yellow solid (71 mg, 79%), m.p.= 149-151 °C; <sup>1</sup>H NMR (400 MHz, CDCl<sub>3</sub>): δ 8.86 (t, J = 1.68 Hz, 1H), 8.54 (d, J = 8.97 Hz, 1H), 8.47-8.44 (m, 2H), 8.43-8.41 (m, 1H), 7.71 (t, J = 7.98 Hz, 1H), 7.49-7.41 (m, 2H), 7.28-7.26 (m, 1H), 7.23-7.22 (m, 1H), 7.05-7.01 (m, 2H), 3.84 (s, 3H) ppm; <sup>13</sup>C{<sup>1</sup>H} NMR (101 MHz, CDCl<sub>3</sub>): δ 192.3, 187.1, 160.2, 148.5, 140.8, 137.2, 135.4, 135.1, 130.3, 130.1, 129.5, 128.3, 127.3, 125.0, 123.6, 120.9, 120.5, 116.4, 116.0, 114.6, 55.6 ppm; HRMS (ESI) m/z: calcd. for C<sub>22</sub>H<sub>16</sub>N<sub>3</sub>O<sub>5</sub> [M+H]<sup>+</sup>: 402.1090, found: 402.1070

**1-(furan-2-yl)-2-(3-(4-isopropylphenyl)imidazo[1,5-a]pyridin-1-yl)ethane-1,2-dione (5l)**

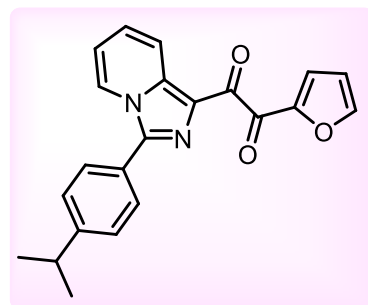

Following GP2, the compound **5l** was obtained as yellow solid (64 mg, 84%), m.p.= 148-150 °C; <sup>1</sup>H NMR (400 MHz, CDCl<sub>3</sub>): δ 8.44 (d, J = 9.06 Hz, 1H), 8.40 (d, J = 7.10 Hz, 1H), 7.69 (s, 1H), 7.65 (d, J = 8.08 Hz, 2H), 7.37-7.35 (m, 4H), 6.95 (t, J = 6.80 Hz, 1H), 6.57-6.56 (m, 1H), 2.99-2.93 (m, 1H), 1.28 (s, 3H), 1.26 (s, 3H) ppm; <sup>13</sup>C{<sup>1</sup>H} NMR (101 MHz, CDCl<sub>3</sub>): δ 186.2, 182.1, 151.1, 150.5, 148.3, 140.8, 137.1, 128.9, 127.6, 127.3, 127.1, 126.0, 123.4, 122.0, 120.4, 115.9, 112.7, 34.2, 23.9 ppm HRMS (ESI) m/z: calcd. for C<sub>22</sub>H<sub>19</sub>N<sub>2</sub>O<sub>3</sub> [M+H]<sup>+</sup>: 359.1396, found: 359.1384

**1-(3-phenylimidazo[1,5-a]pyridin-1-yl)propane-1,2-dione (5m)**

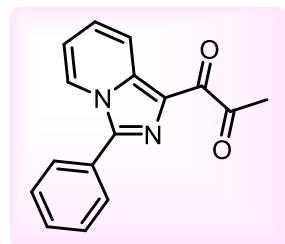

Following GP3, the compound **5m** was obtained as yellow semi-solid (54 mg, 79%); <sup>1</sup>H NMR (400 MHz, CDCl<sub>3</sub>): δ 8.45-8.39 (m, 2H), 7.79-7.77 (m, 2H), 7.59-7.52 (m, 3H), 7.39-7.34 (m, 1H), 6.96 (dt, J = 6.88, 1.20 Hz, 1H), 2.62 (s, 3H) ppm; <sup>13</sup>C{<sup>1</sup>H} NMR (101 MHz, CDCl<sub>3</sub>): δ 202.5, 187.7, 140.5, 137.2, 130.1, 129.3, 128.9, 128.7, 127.5, 126.3, 123.2, 120.5,

116.0, 27.3 ppm; **HRMS (ESI) m/z**: calcd. for C<sub>16</sub>H<sub>13</sub>N<sub>2</sub>O<sub>2</sub> [M+H]<sup>+</sup>: 265.0977, found: 265.0972

**1-(3-(benzo[d][1,3]dioxol-5-yl)imidazo[1,5-a]pyridin-1-yl)propane-1,2-dione (5n)**

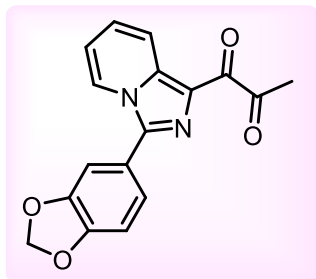

Following GP3, the compound **5n** was obtained as yellow semi-solid (54 mg, 83%); <sup>1</sup>H NMR (400 MHz, CDCl<sub>3</sub>): δ 8.40 (d, J = 8.94 Hz, 1H), 8.35 (d, J = 7.05 Hz, 1H), 7.36-7.32 (m, 1H), 7.25-7.22 (m, 1H), 7.21 (d, J = 1.67 Hz, 1H), 6.97-6.93 (m, 2H), 6.02 (s, 2H), 2.59 (s, 3H) ppm; <sup>13</sup>C{<sup>1</sup>H} NMR (101 MHz, CDCl<sub>3</sub>): δ 202.5, 187.6, 149.2, 148.5, 140.2, 137.1, 127.4, 126.0, 123.3, 123.1, 122.2, 120.5, 115.9, 109.4, 109.0, 101.8, 27.3 ppm; **HRMS (ESI) m/z**: calcd. for C<sub>17</sub>H<sub>13</sub>N<sub>2</sub>O<sub>4</sub> [M+H]<sup>+</sup>: 309.0875, found: 309.0858

**1-(3-(4-isopropylphenyl)imidazo[1,5-a]pyridin-1-yl)propane-1,2-dione (5o)**

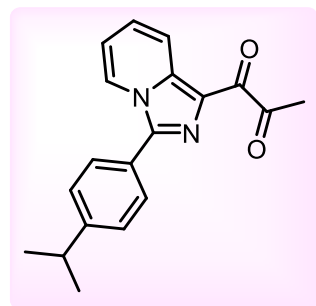

Following GP3, the compound **5o** was obtained as yellow semi-solid (53 mg, 82%); <sup>1</sup>H NMR (400 MHz, CDCl<sub>3</sub>): δ 8.41-8.38 (m, 2H), 7.68 (d, J = 8.27 Hz, 2H), 7.40 (d, J = 7.99 Hz, 2H), 7.36-7.31 (m, 1H), 6.95-6.91 (m, 1H), 3.03-2.96 (m, 1H), 2.60 (s, 3H), 1.31 (s, 3H), 1.29 (s, 3H) ppm; <sup>13</sup>C{<sup>1</sup>H} NMR (101 MHz, CDCl<sub>3</sub>): δ 202.6, 187.8, 151.2, 140.7, 137.1, 128.9, 127.4, 126.2, 126.1, 123.4, 120.4, 115.8, 34.2, 27.3, 23.9 ppm; **HRMS (ESI) m/z**: calcd. for C<sub>19</sub>H<sub>19</sub>N<sub>2</sub>O<sub>2</sub> [M+H]<sup>+</sup>: 307.1447 found: 307.1443

**1-(3-(4-fluorophenyl)imidazo[1,5-a]pyridin-1-yl)propane-1,2-dione (5p)**

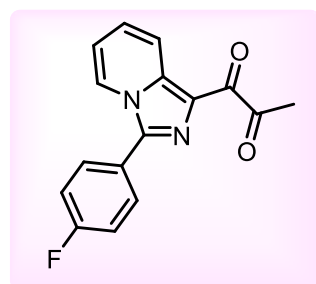

Following GP3, the compound **5p** was obtained as yellow solid (54 mg, 81%), m.p. = 114-116 °C; <sup>1</sup>H NMR (400 MHz, CDCl<sub>3</sub>): δ 8.44 (dd, J = 9.13, 0.85 Hz, 1H), 8.35 (td, J = 7.09, 1.05 Hz, 1H), 7.82-7.77 (m, 2H), 7.41-7.37 (m, 1H), 7.30-7.28 (m, 2H), 7.02-6.99 (m, 1H), 2.63 (s, 3H) ppm; <sup>13</sup>C{<sup>1</sup>H} NMR (101 MHz, CDCl<sub>3</sub>): δ 202.4, 187.6, 164.9, 162.4, 139.4, 137.1, 131.0 (d, J = 8.66 Hz), 127.5, 126.2, 124.8 (d, J = 3.50 Hz), 123.0, 120.5, 116.6, 116.4, 116.1, 27.5 ppm; <sup>19</sup>F NMR (377 MHz, CDCl<sub>3</sub>): -109.53 to -

109.60 (m) ppm; **HRMS (ESI) m/z**: calcd. for C<sub>16</sub>H<sub>12</sub>N<sub>2</sub>O<sub>2</sub>F [M+H]<sup>+</sup>: 283.0883, found: 283.0887

**1-(3-(4-chlorophenyl)imidazo[1,5-a]pyridin-1-yl)propane-1,2-dione (5q)**

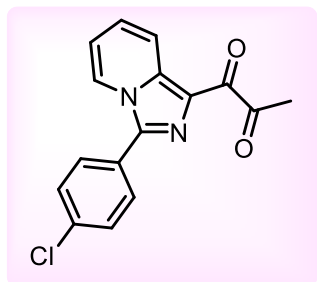

Following GP3, the compound **5q** was obtained as yellow solid (52 mg, 80%), m.p.= 108-110 °C; <sup>1</sup>H NMR (400 MHz, CDCl<sub>3</sub>): δ 8.43 (td, J = 9.05, 0.86 Hz, 1H), 8.36-8.34 (m, 1H), 7.75-7.71 (m, 2H), 7.56-7.52 (m, 2H), 7.39-7.35 (m, 1H), 7.00-6.96 (m, 1H), 2.60 (s, 3H) ppm; <sup>13</sup>C{<sup>1</sup>H} NMR (101 MHz, CDCl<sub>3</sub>): δ 202.3, 187.6,

139.3, 137.2, 136.2, 130.1, 129.6, 127.5, 127.1, 126.4, 123.0, 120.6, 116.3, 27.2 ppm; **HRMS (ESI) m/z**: calcd. for C<sub>16</sub>H<sub>12</sub>N<sub>2</sub>O<sub>2</sub>Cl [M+H]<sup>+</sup>: 299.0587, found: 299.0585

**1-(imidazo[1,5-a]pyridin-1-yl)propane-1,2-dione (5r)**

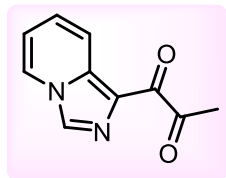

Following GP3, the compound **5r** was obtained as yellow semi-solid (68 mg, 85%); <sup>1</sup>H NMR (400 MHz, CDCl<sub>3</sub>): δ 9.55 (dd, J = 7.03, 0.84 Hz, 1H), 7.76 (d, J = 8.86 Hz, 2H), 7.35-7.31 (m, 1H), 7.13 (t, J = 6.94 Hz, 1H),

2.60 (s, 3H) ppm; <sup>13</sup>C{<sup>1</sup>H} NMR (101 MHz, CDCl<sub>3</sub>): δ 200.6, 181.1, 135.8, 131.7, 126.7, 126.4, 126.3, 118.4, 117.5, 27.1 ppm; **HRMS (ESI) m/z**: calcd. for C<sub>10</sub>H<sub>9</sub>N<sub>2</sub>O<sub>2</sub> [M+H]<sup>+</sup>: 189.0664, found: 189.0665

**(Z)-2-(hydroxyimino)-1-phenyl-2-(3-phenylimidazo[1,5-a]pyridin-1-yl)ethan-1-one (6a)**

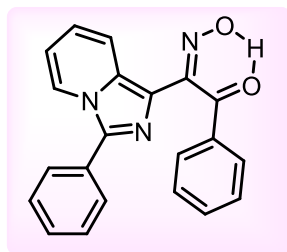

Following GP4, the compound **6a** was obtained as yellow colored solid (42 mg, 81%); <sup>1</sup>H NMR (400 MHz, DMSO-d<sub>6</sub>): δ 11.40 (s, 1H), 8.62 (d, J = 7.01 Hz, 1H), 8.35 (d, J = 6.26 Hz, 1H), 7.75 (d, J = 6.40 Hz, 2H), 7.58-7.51 (m, 6H), 7.39-7.37 (m, 3H), 7.12 (t, J = 6.63 Hz,

1H) ppm; <sup>13</sup>C{<sup>1</sup>H} NMR (101 MHz, DMSO-d<sub>6</sub>): δ 155.7, 139.1, 135.0, 132.7, 129.6, 129.3, 129.0, 128.7, 128.5, 128.4, 128.3 (d, J = 2.73 Hz), 125.8, 124.3, 118.7, 116.1 ppm; **HRMS (ESI) m/z**: calcd. for C<sub>21</sub>H<sub>16</sub>N<sub>3</sub>O<sub>2</sub> [M+H]<sup>+</sup>: 342.1243, found: 342.1252

**(Z)-2-(3-(benzo[d][1,3]dioxol-5-yl)imidazo[1,5-a]pyridin-1-yl)-2-(hydroxyimino)-1-phenylethan-1-one (6b)**

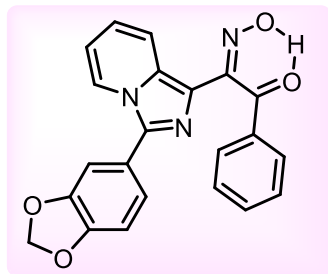

Following GP4, the compound **6b** was obtained as yellow solid (40 mg, 77%);  $^1\text{H}$  NMR (400 MHz,  $\text{CDCl}_3$  and  $\text{DMSO-d}_6$ ):  $\delta$  11.03 (d,  $J = 8.99$  Hz, 1H), 8.33 (t,  $J = 6.18$  Hz, 2H), 7.66-7.63 (m, 1H), 7.57-7.55 (m, 2H), 7.27-7.24 (m, 3H), 7.14-7.11 (m, 1H), 7.08-7.07 (m, 1H), 6.92-6.86 (m, 2H), 5.99-5.97 (m, 2H) ppm;  $^{13}\text{C}\{^1\text{H}\}$

NMR (101 MHz,  $\text{CDCl}_3$  and  $\text{DMSO-d}_6$ ):  $\delta$  155.5, 147.9, 147.3, 138.5, 134.5, 132.1, 128.6, 128.3, 127.8, 127.5, 127.0, 126.1, 125.3, 122.4, 121.9, 121.4, 118.8, 114.7, 108.2, 107.8, 100.7 ppm; HRMS (ESI)  $m/z$ : calcd. for  $\text{C}_{22}\text{H}_{16}\text{N}_3\text{O}_4$   $[\text{M}+\text{H}]^+$ : 386.3790, found: 386.3792

#### 4. Copies of NMR, HRMS, GC-MS, MS-MS Spectra

**$^1\text{H}$  NMR (400 MHz,  $\text{CDCl}_3$ ) of 3a**

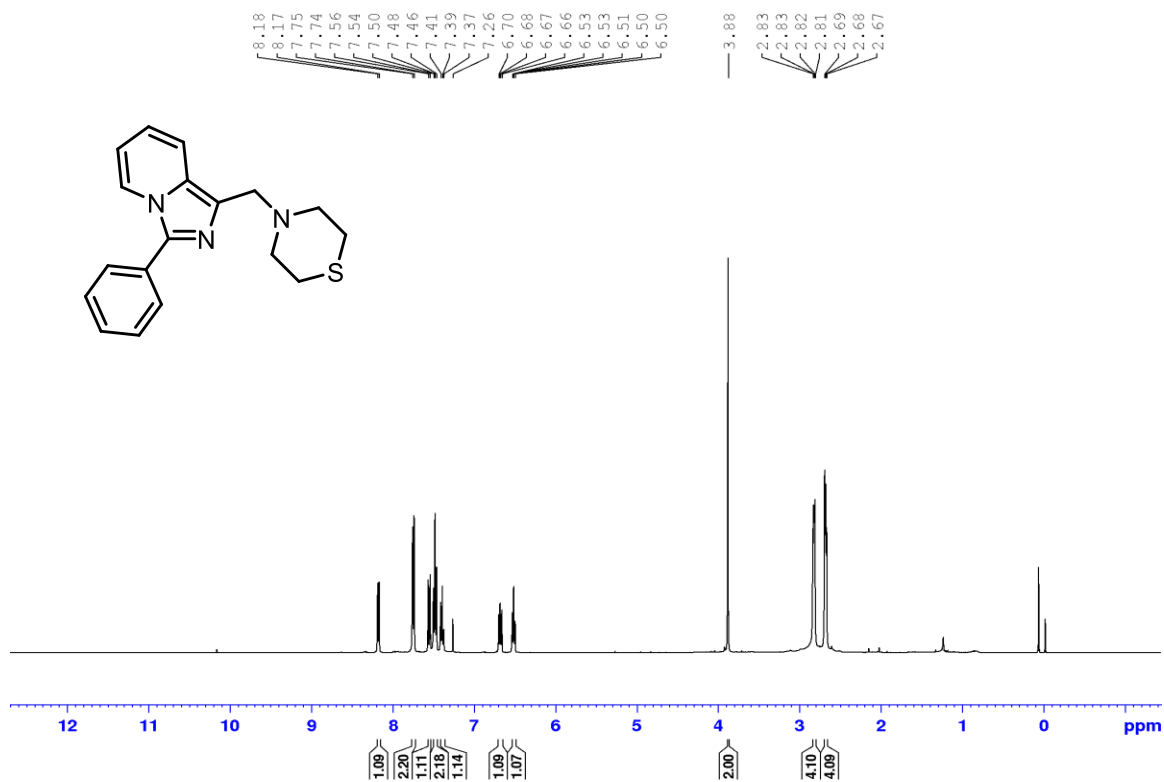

**$^{13}\text{C}$  NMR (101 MHz,  $\text{CDCl}_3$ ) of 3a**

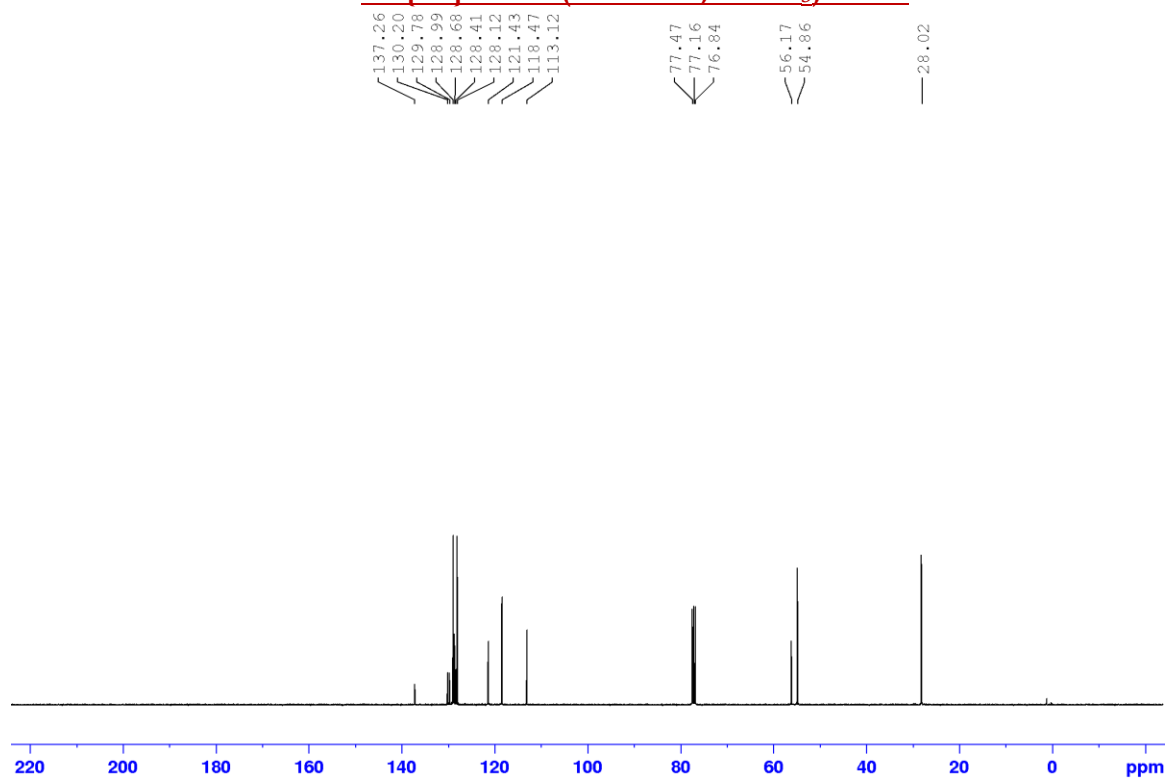

### DEPT-135 (101 MHz, CDCl<sub>3</sub>) of 3a

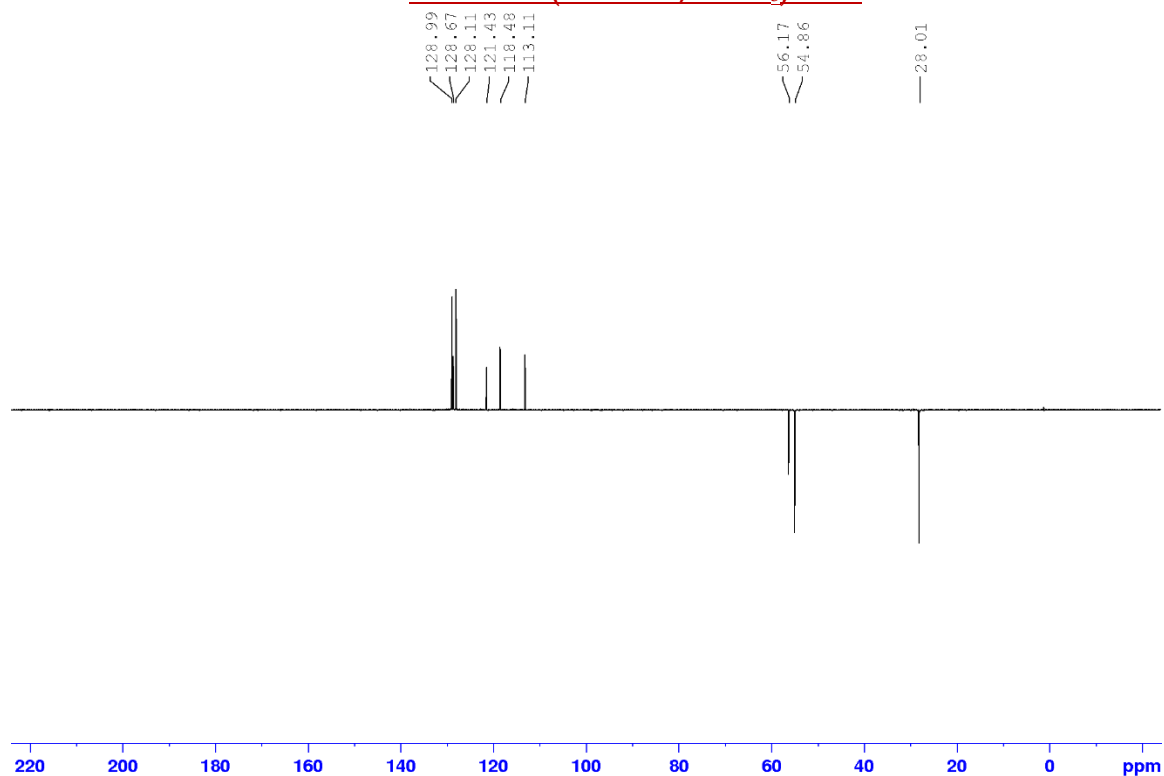

### HRMS of 3a

#### Elemental Composition Report

Page 1

#### Single Mass Analysis

Tolerance = 50.0 PPM / DBE: min = -1.5, max = 50.0

Element prediction: Off

Number of isotope peaks used for i-FIT = 3

Monoisotopic Mass, Even Electron Ions

19 formula(e) evaluated with 1 results within limits (up to 3 closest results for each mass)

Elements Used:

C: 0-18 H: 0-100 N: 0-3 S: 0-1 Na: 0-1

SM-334

QMI DIVISION, CSIR-IIIM JAMMU  
Xevo G2-XS QTOF YFC2015

23-Apr-2024

12:22:54

230424\_06 5 (0.121)

1: TOF MS ES+  
2.52e+007

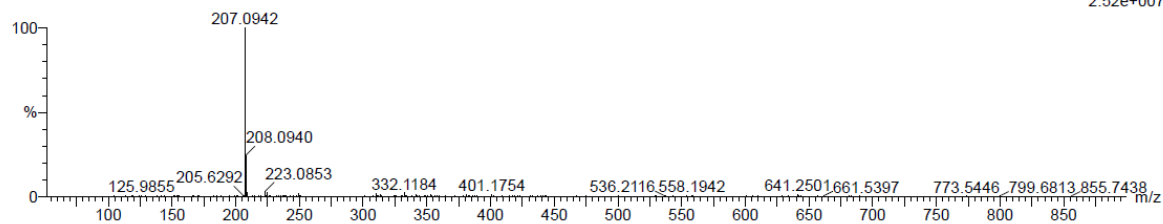

Minimum: -1.5  
Maximum: 50.0

| Mass     | Calc. Mass | mDa  | PPM  | DBE  | i-FIT  | Norm | Conf (%) | Formula         |
|----------|------------|------|------|------|--------|------|----------|-----------------|
| 332.1184 | 332.1197   | -1.3 | -3.9 | 10.5 | 1145.4 | n/a  | n/a      | C18 H19 N3 S Na |



Single Mass Analysis

Tolerance = 50.0 PPM / DBE: min = -1.5, max = 50.0

Element prediction: Off

Number of isotope peaks used for i-FIT = 3

Monoisotopic Mass, Even Electron Ions

6 formula(e) evaluated with 1 results within limits (up to 3 closest results for each mass)

Elements Used:

C: 0-14 H: 0-100 N: 0-2

SM-334

QMI DIVISION, CSIR-IIIM JAMMU  
Xevo G2-XS QTOF YFC2015

23-Apr-2024

12:22:54

1: TOF MS ES+

2.44e+007

230424\_06 7 (0.155)

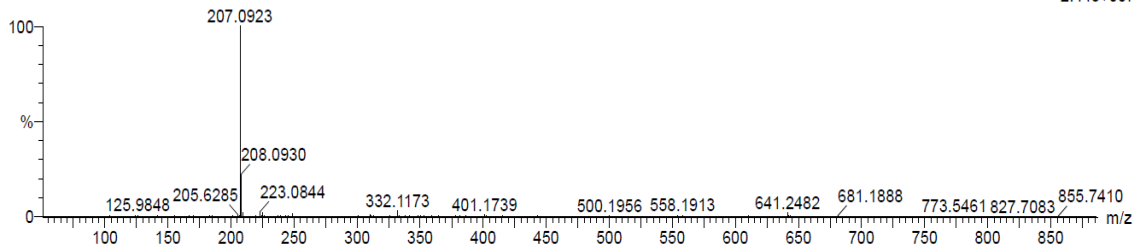

Minimum: -1.5  
Maximum: 2.0 50.0 50.0

| Mass     | Calc. Mass | mDa | PPM | DBE  | i-FIT  | Norm | Conf (%) | Formula    |
|----------|------------|-----|-----|------|--------|------|----------|------------|
| 207.0923 | 207.0922   | 0.1 | 0.5 | 10.5 | 1517.9 | n/a  | n/a      | C14 H11 N2 |

**<sup>1</sup>H NMR (400 MHz, CDCl<sub>3</sub>) of 3b**

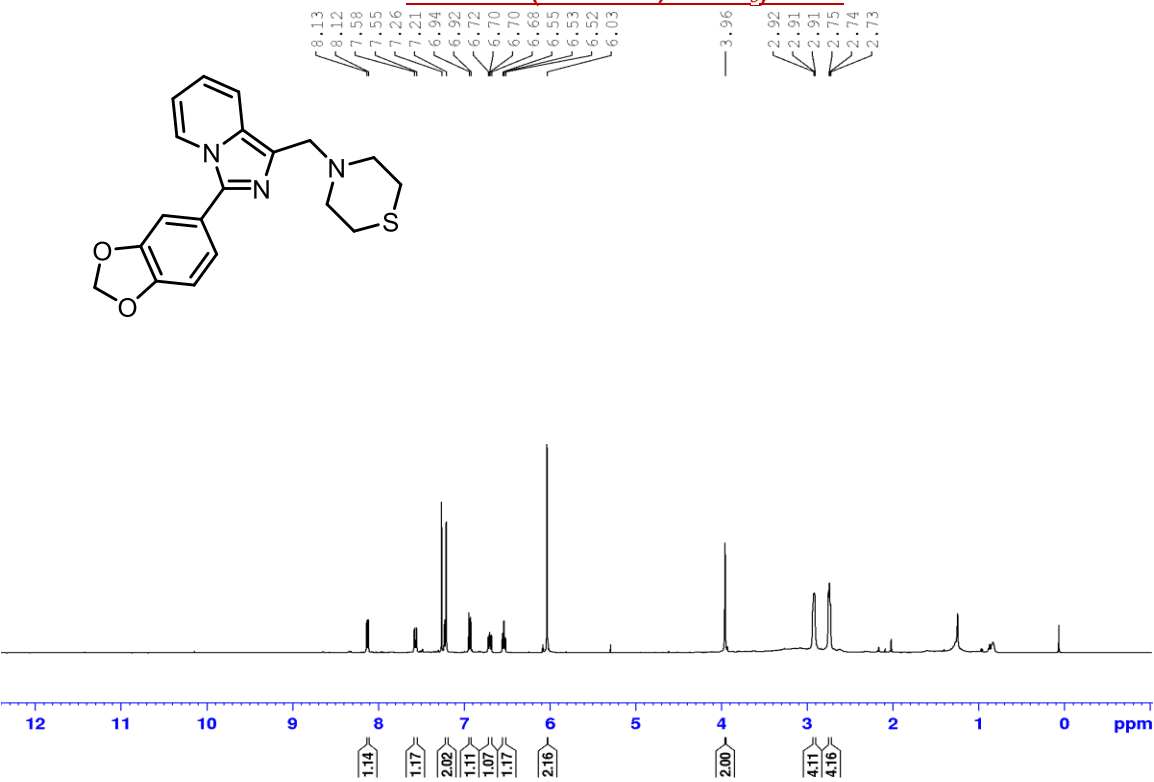

**$^{13}\text{C}\{^1\text{H}\}$  NMR (101 MHz,  $\text{CDCl}_3$ ) of 3b**

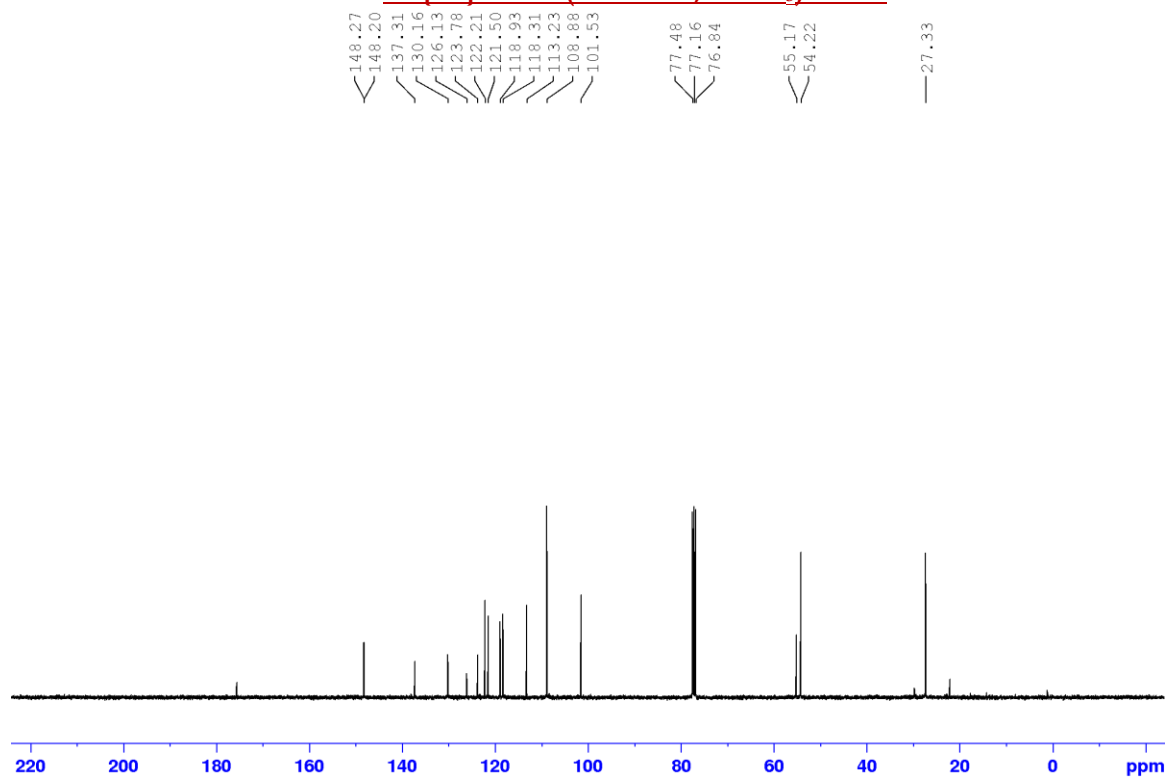

**DEPT-135 (400 MHz,  $\text{CDCl}_3$ ) of 3b**

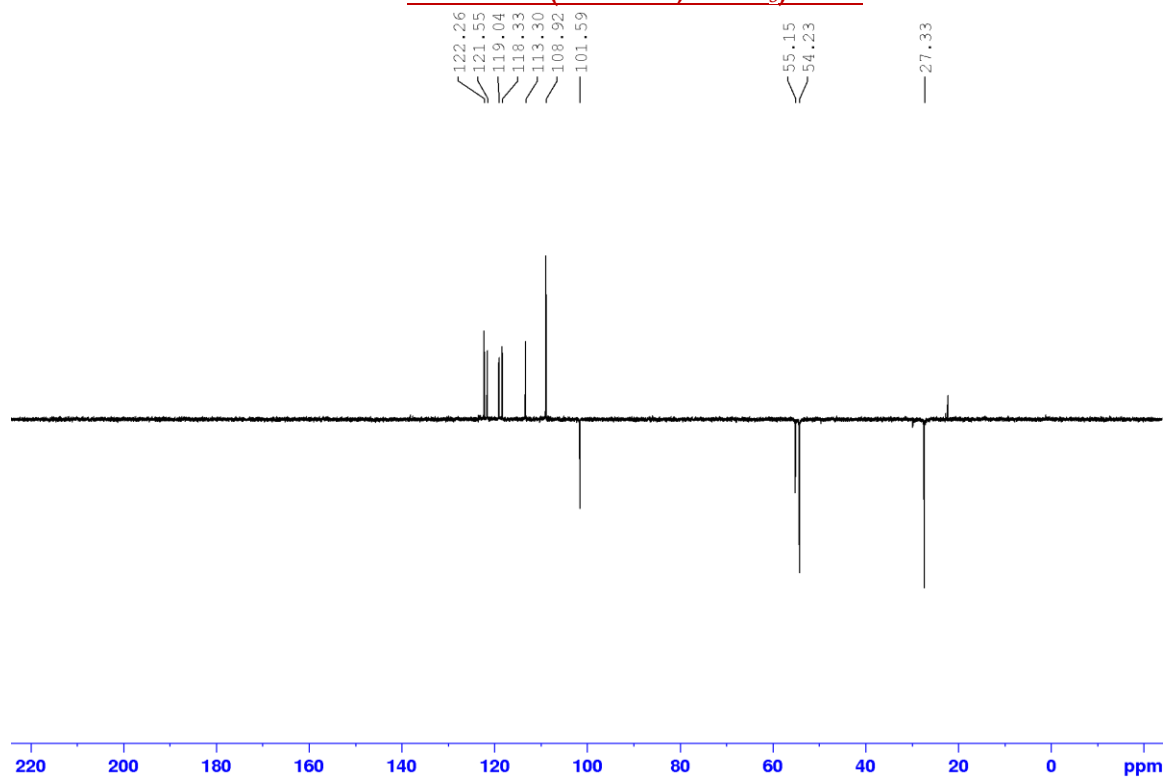

## HRMS of 3b

### Elemental Composition Report

Page 1

#### Single Mass Analysis

Tolerance = 50.0 PPM / DBE: min = -1.5, max = 50.0

Element prediction: Off

Number of isotope peaks used for i-FIT = 3

Monoisotopic Mass, Even Electron Ions

13 formula(e) evaluated with 1 results within limits (up to 3 closest results for each mass)

Elements Used:

C: 0-15 H: 0-100 N: 0-2 O: 0-2

SM-520

QMI DIVISION, CSIR-IIIM JAMMU  
Xevo G2-XS QTOF YFC2015

07-May-2024

14:31:09

1: TOF MS ES+

1.76e+007

070524\_36 5 (0.121)

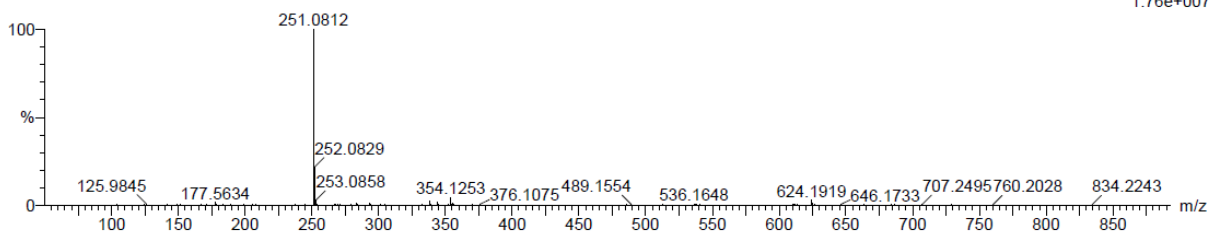

Minimum: -1.5  
Maximum: 2.0 50.0 50.0

| Mass     | Calc. Mass | mDa  | PPM  | DBE  | i-FIT  | Norm | Conf(%) | Formula       |
|----------|------------|------|------|------|--------|------|---------|---------------|
| 251.0812 | 251.0821   | -0.9 | -3.6 | 11.5 | 1201.2 | n/a  | n/a     | C15 H11 N2 O2 |

### <sup>1</sup>H NMR (400 MHz, CDCl<sub>3</sub>) of 3c

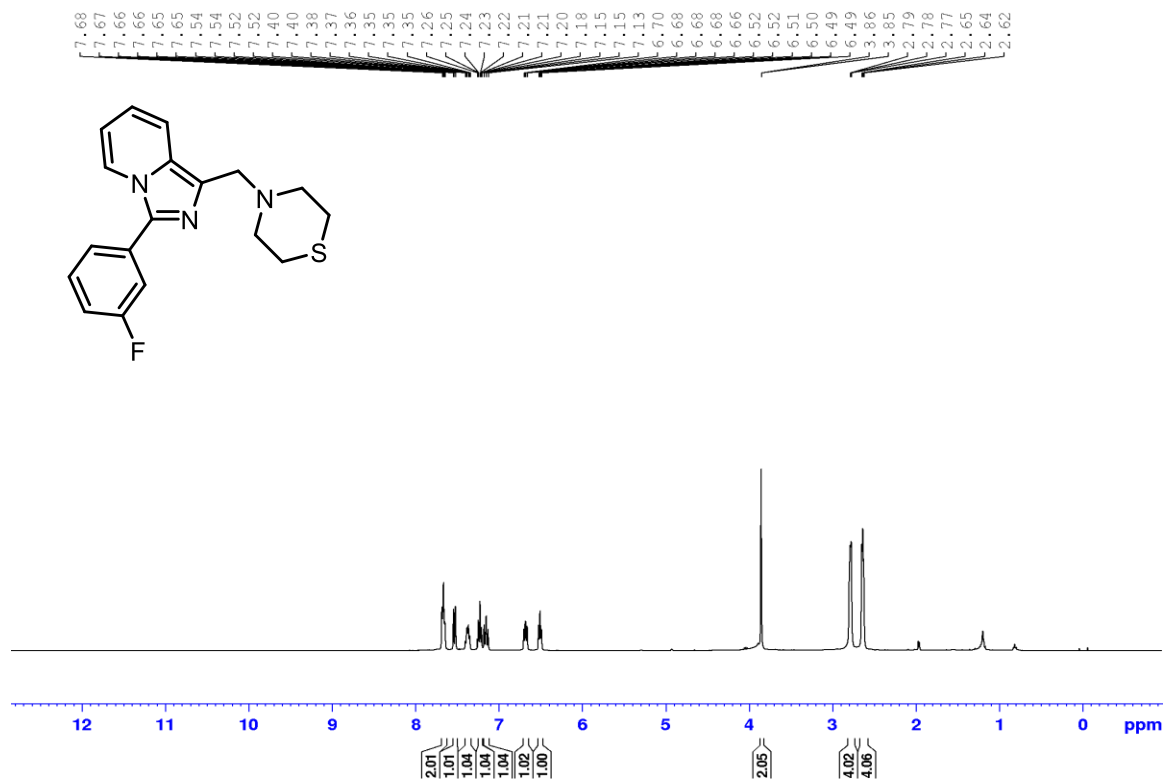

**$^{13}\text{C}\{^1\text{H}\}$  NMR (101 MHz,  $\text{CDCl}_3$ ) of 3c**

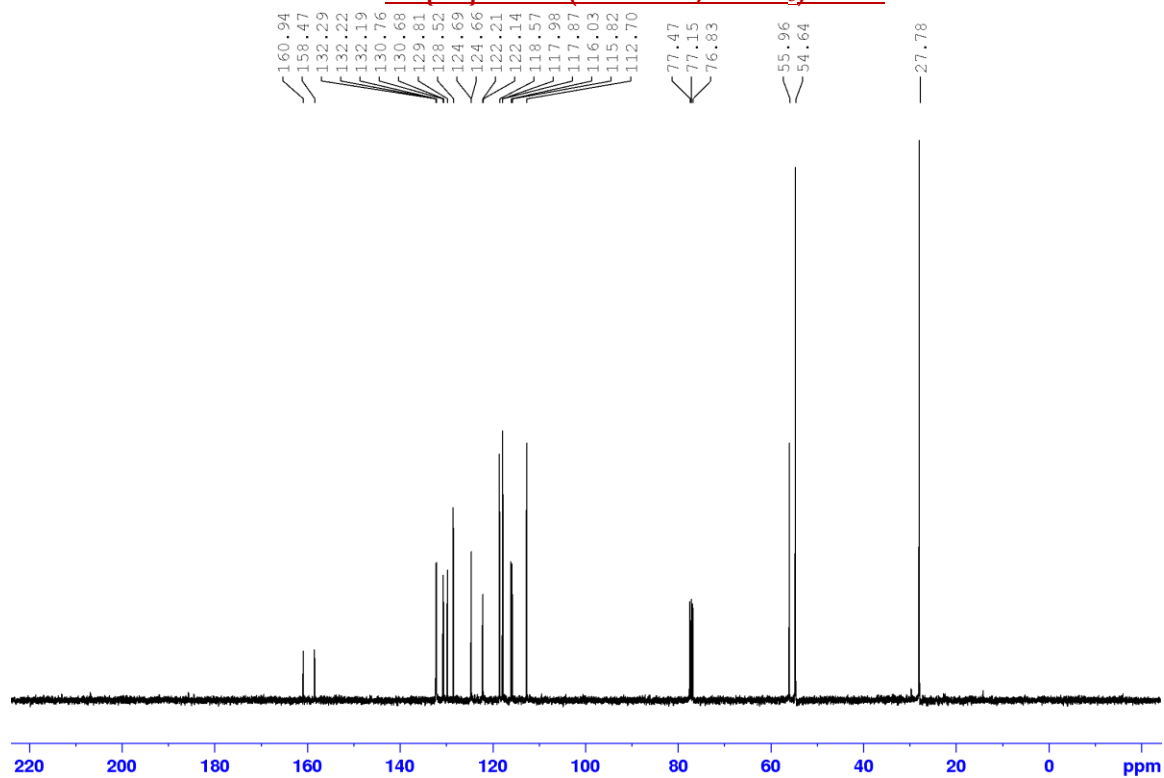

**DEPT-135 (400 MHz,  $\text{CDCl}_3$ ) of 3c**

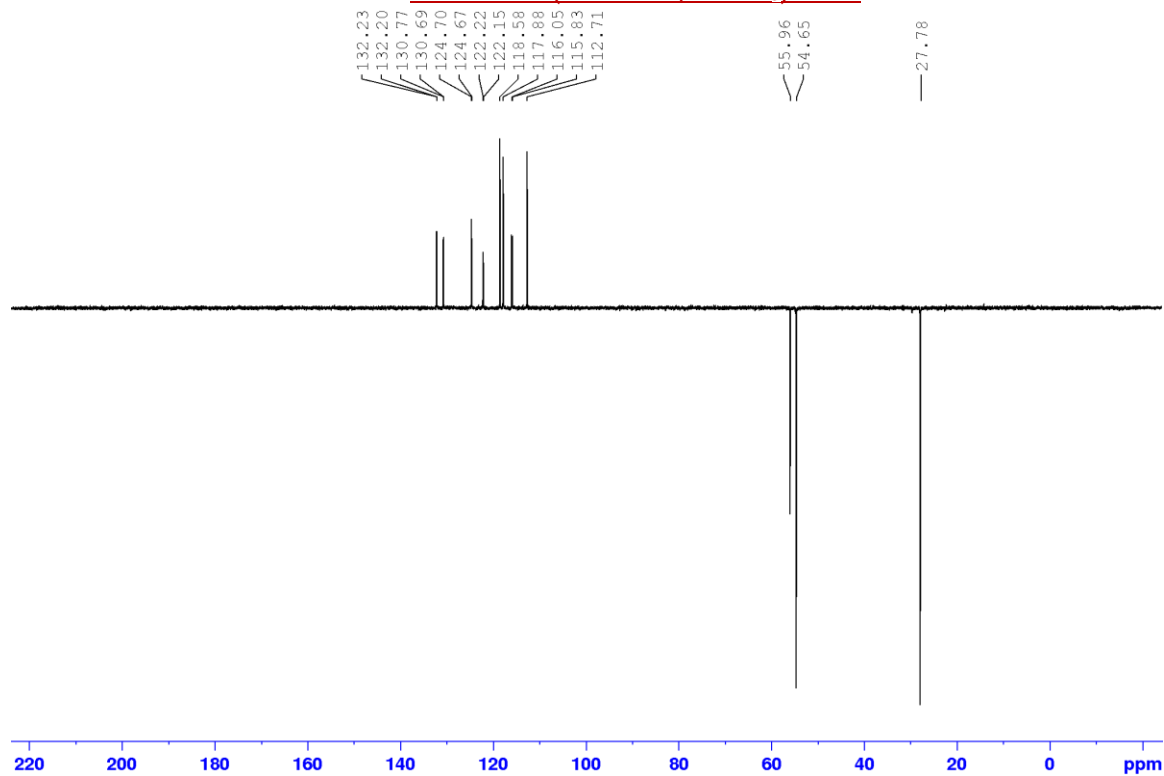

**<sup>19</sup>F NMR (377 MHz, CDCl<sub>3</sub>) of 3c**

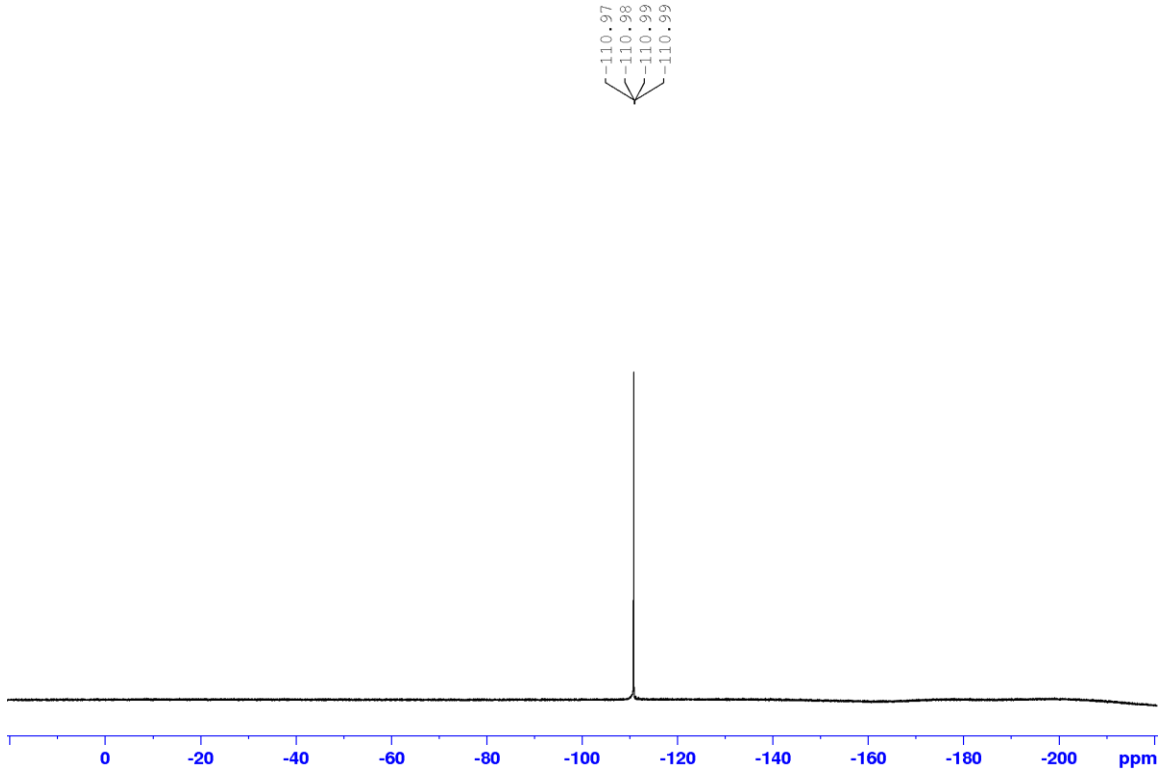

**HRMS of 3c**

**Elemental Composition Report**

Page 1

**Single Mass Analysis**

Tolerance = 50.0 PPM / DBE: min = -1.5, max = 50.0

Element prediction: Off

Number of isotope peaks used for i-FIT = 3

Monoisotopic Mass, Even Electron Ions

9 formula(e) evaluated with 1 results within limits (up to 3 closest results for each mass)

Elements Used:

C: 0-14 H: 0-100 N: 0-2 F: 0-1

SM-378

QMI DIVISION, CSIR-IIIM JAMMU  
Xevo G2-XS QTOF YFC2015

23-Apr-2024

12:33:19

1: TOF MS ES+

9.41e+006

230424\_10 4 (0.104)

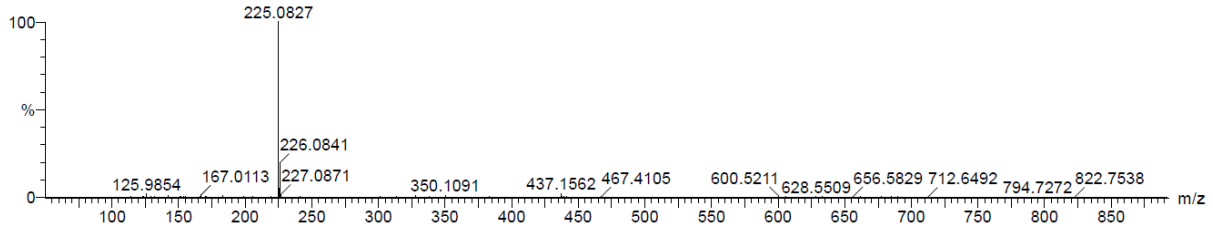

Minimum: -1.5

Maximum: 2.0 50.0 50.0

| Mass     | Calc. Mass | mDa  | PPM  | DBE  | i-FIT  | Norm | Conf(%) | Formula      |
|----------|------------|------|------|------|--------|------|---------|--------------|
| 225.0827 | 225.0828   | -0.1 | -0.4 | 10.5 | 1384.3 | n/a  | n/a     | C14 H10 N2 F |

**$^1\text{H}$  NMR (400 MHz,  $\text{CDCl}_3$ ) of 3d**

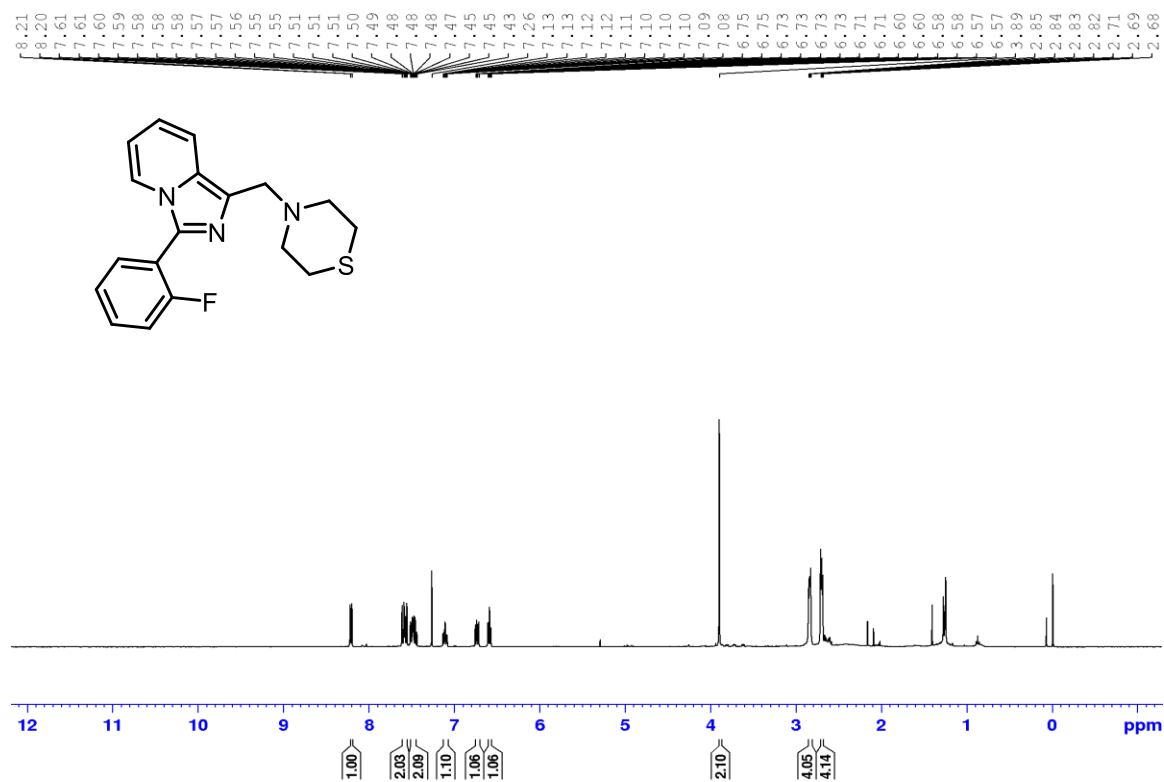

**$^{13}\text{C}$  NMR (101 MHz,  $\text{CDCl}_3$ ) of 3d**

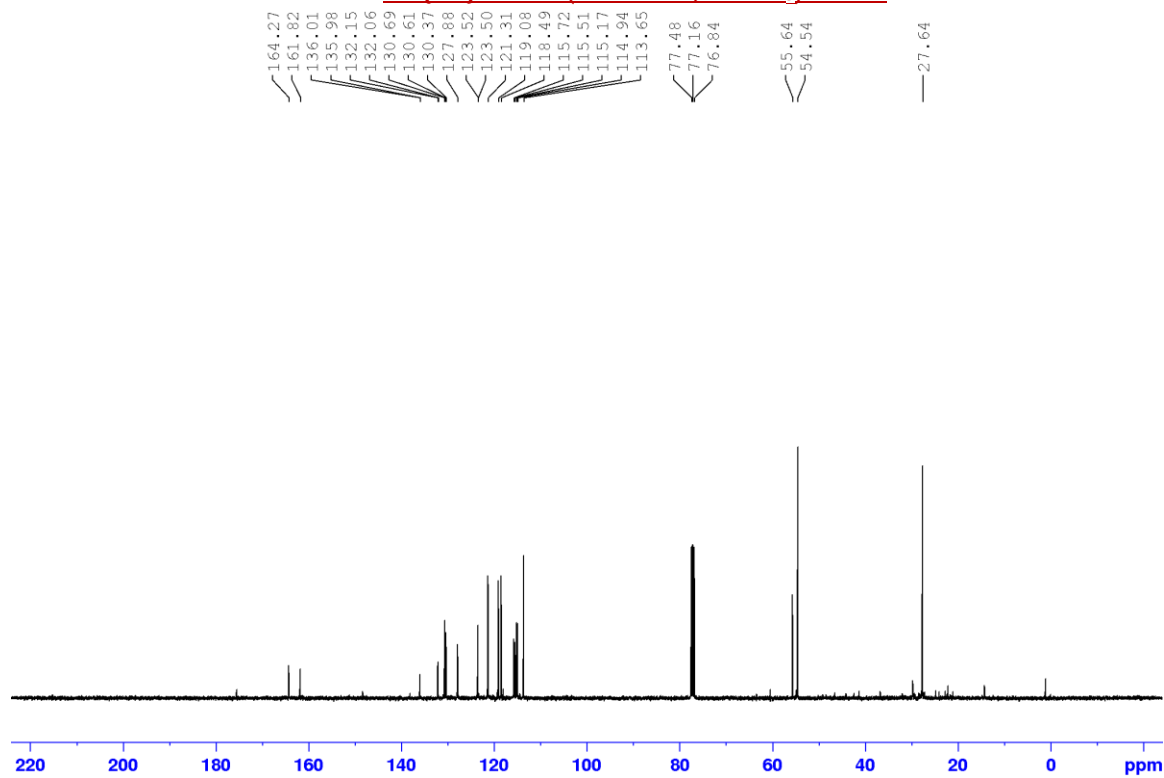

**DEPT-135 (400 MHz, CDCl<sub>3</sub>) of 3d**

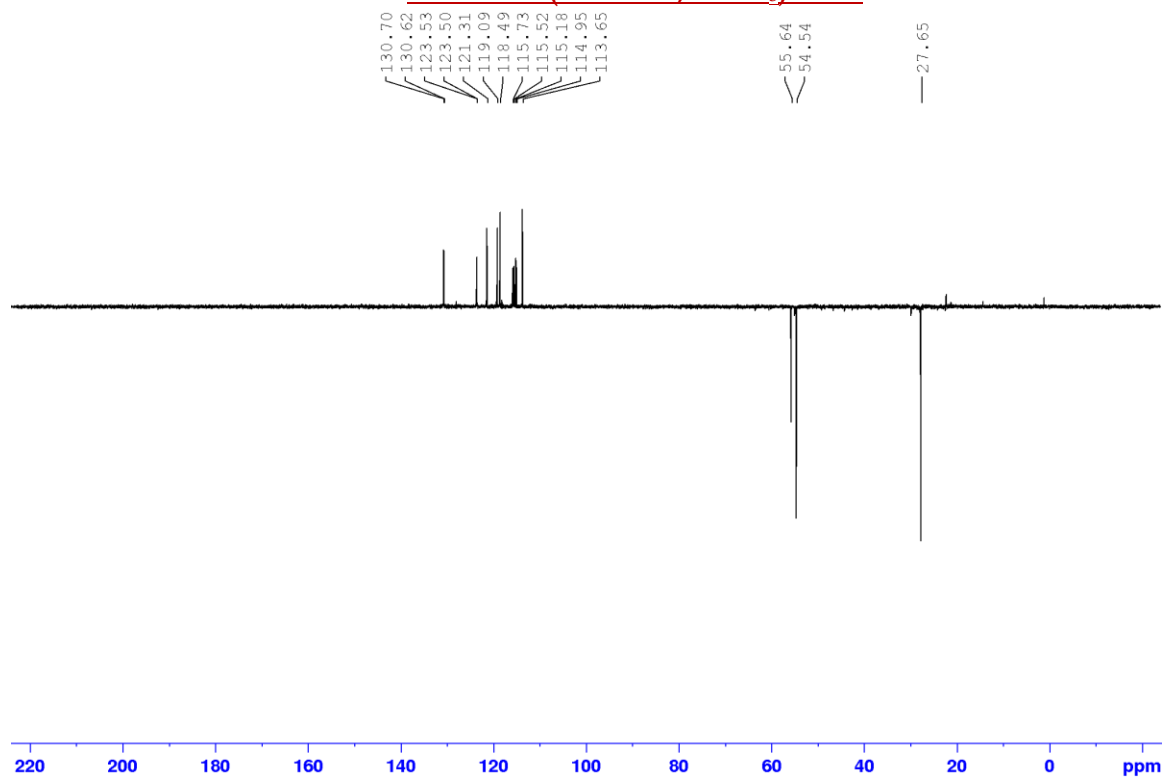

**<sup>19</sup>F NMR (377 MHz, CDCl<sub>3</sub>) of 3d**

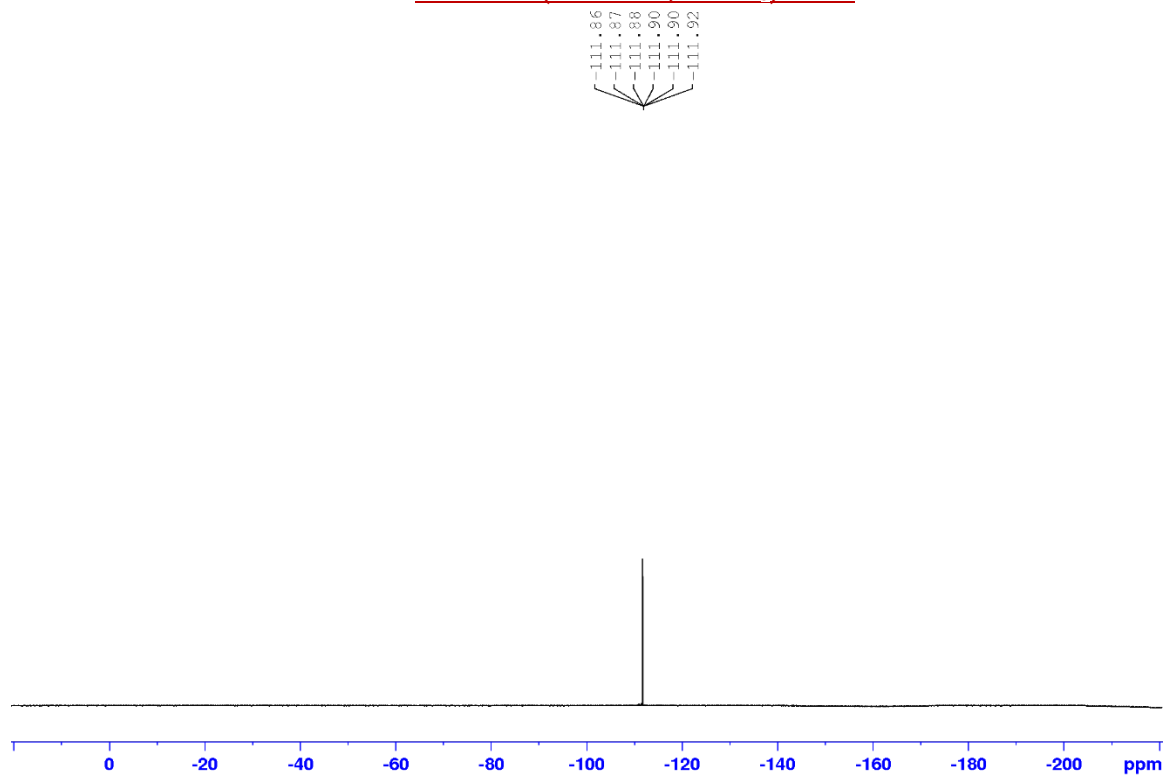

# HRMS of 3d

## Elemental Composition Report

Page 1

### Single Mass Analysis

Tolerance = 50.0 PPM / DBE: min = -1.5, max = 50.0  
Element prediction: Off  
Number of isotope peaks used for i-FIT = 3

Monoisotopic Mass, Even Electron Ions

29 formula(e) evaluated with 1 results within limits (up to 3 closest results for each mass)

Elements Used:

C: 0-18 H: 0-100 N: 0-4 S: 0-1 F: 0-1

SM-379

QMI DIVISION, CSIR-IIIM JAMMU  
Xevo G2-XS QTOF YFC2015

23-Apr-2024

13:00:06

230424\_20 4 (0.104)

1: TOF MS ES+  
3.02e+006

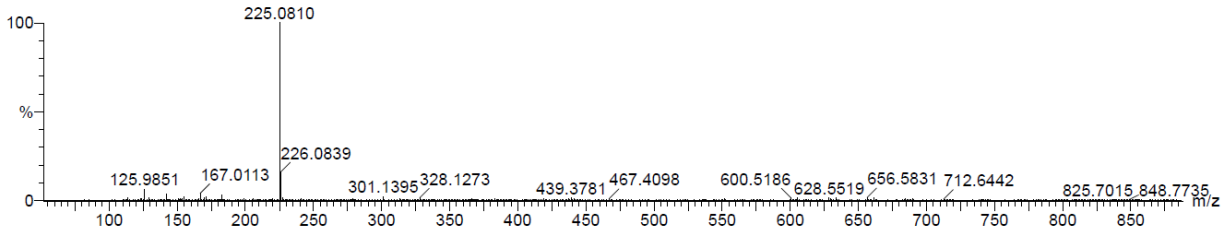

Minimum: -1.5  
Maximum: 2.0 50.0 50.0

| Mass     | Calc. Mass | mDa  | PPM  | DBE  | i-FIT  | Norm | Conf (%) | Formula        |
|----------|------------|------|------|------|--------|------|----------|----------------|
| 328.1273 | 328.1284   | -1.1 | -3.4 | 10.5 | 1134.8 | n/a  | n/a      | C18 H19 N3 S F |

## Elemental Composition Report

Page 1

### Single Mass Analysis

Tolerance = 50.0 PPM / DBE: min = -1.5, max = 50.0  
Element prediction: Off  
Number of isotope peaks used for i-FIT = 3

Monoisotopic Mass, Even Electron Ions

9 formula(e) evaluated with 1 results within limits (up to 3 closest results for each mass)

Elements Used:

C: 0-14 H: 0-100 N: 0-2 F: 0-1

SM-379

QMI DIVISION, CSIR-IIIM JAMMU  
Xevo G2-XS QTOF YFC2015

23-Apr-2024

13:00:06

230424\_20 7 (0.155)

1: TOF MS ES+  
2.28e+007

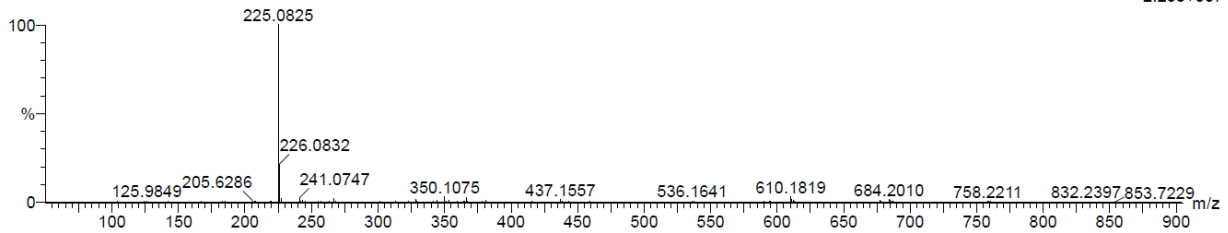

Minimum: -1.5  
Maximum: 2.0 50.0 50.0

| Mass     | Calc. Mass | mDa  | PPM  | DBE  | i-FIT  | Norm | Conf (%) | Formula      |
|----------|------------|------|------|------|--------|------|----------|--------------|
| 225.0825 | 225.0828   | -0.3 | -1.3 | 10.5 | 1403.5 | n/a  | n/a      | C14 H10 N2 F |



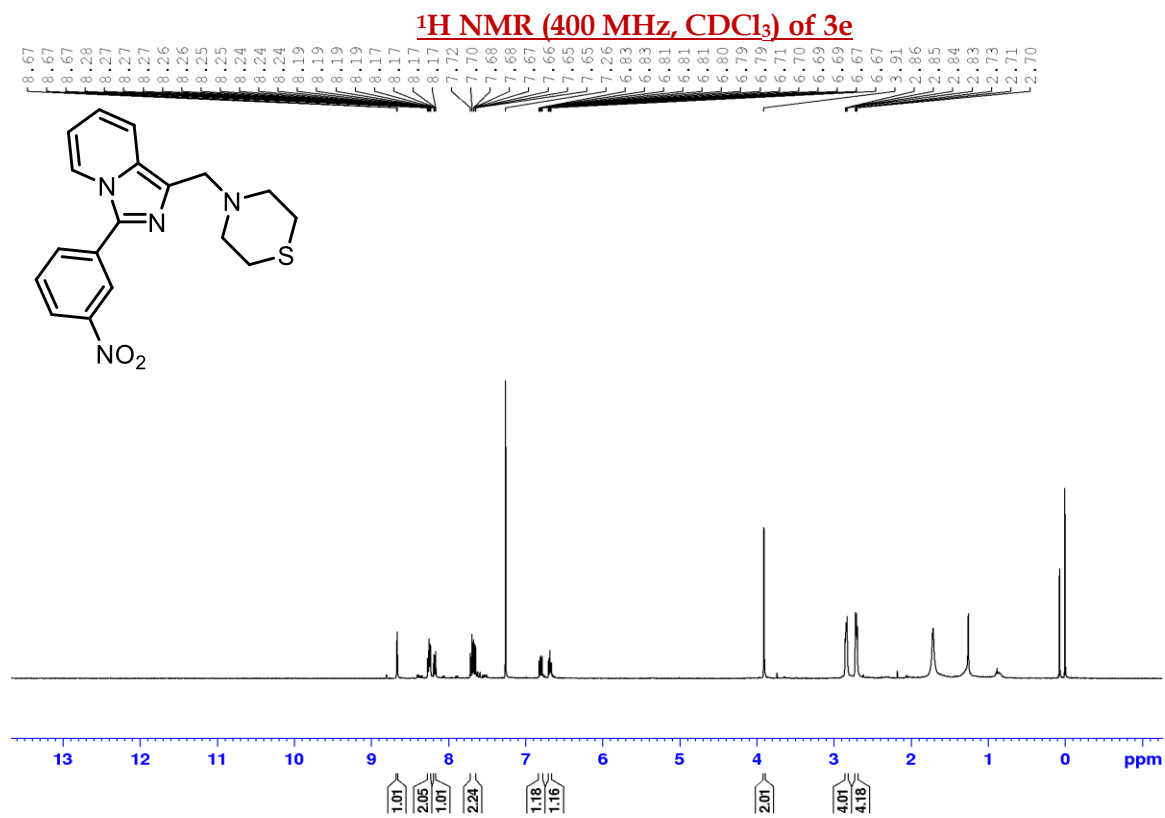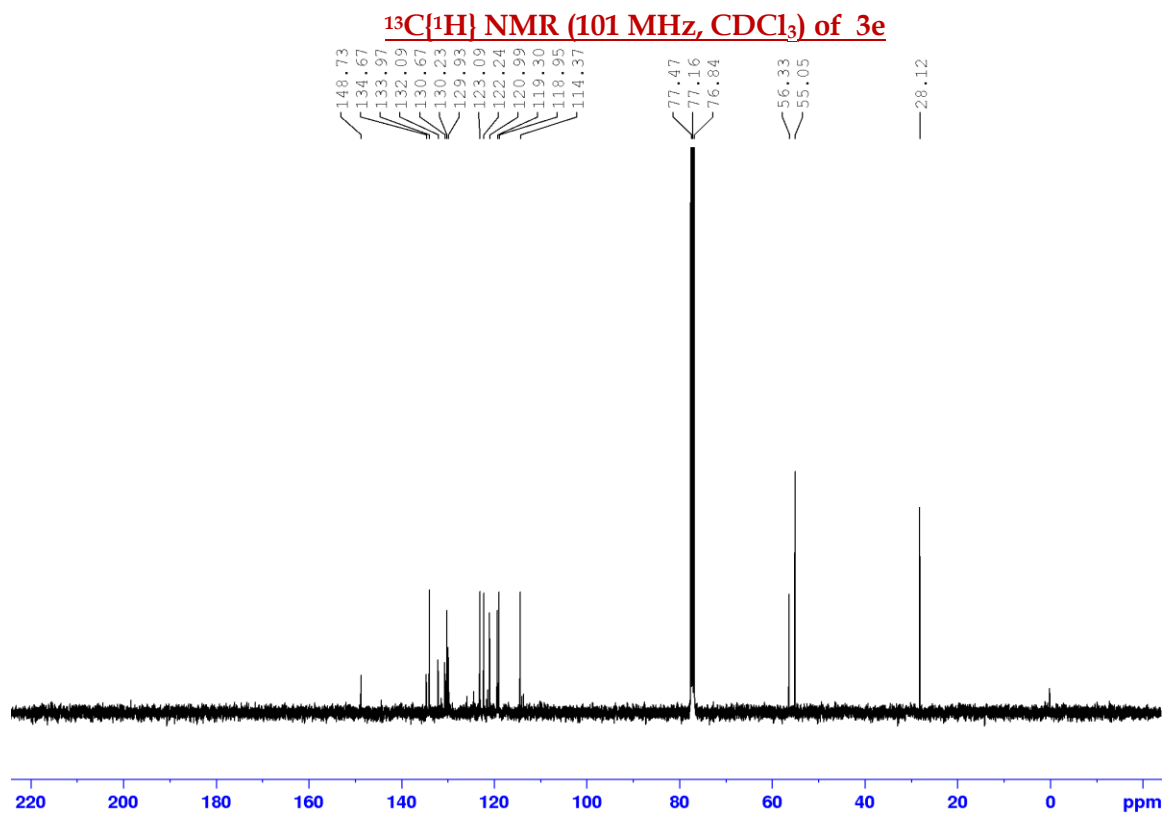

### DEPT-135 (400 MHz, CDCl<sub>3</sub>) of 3e

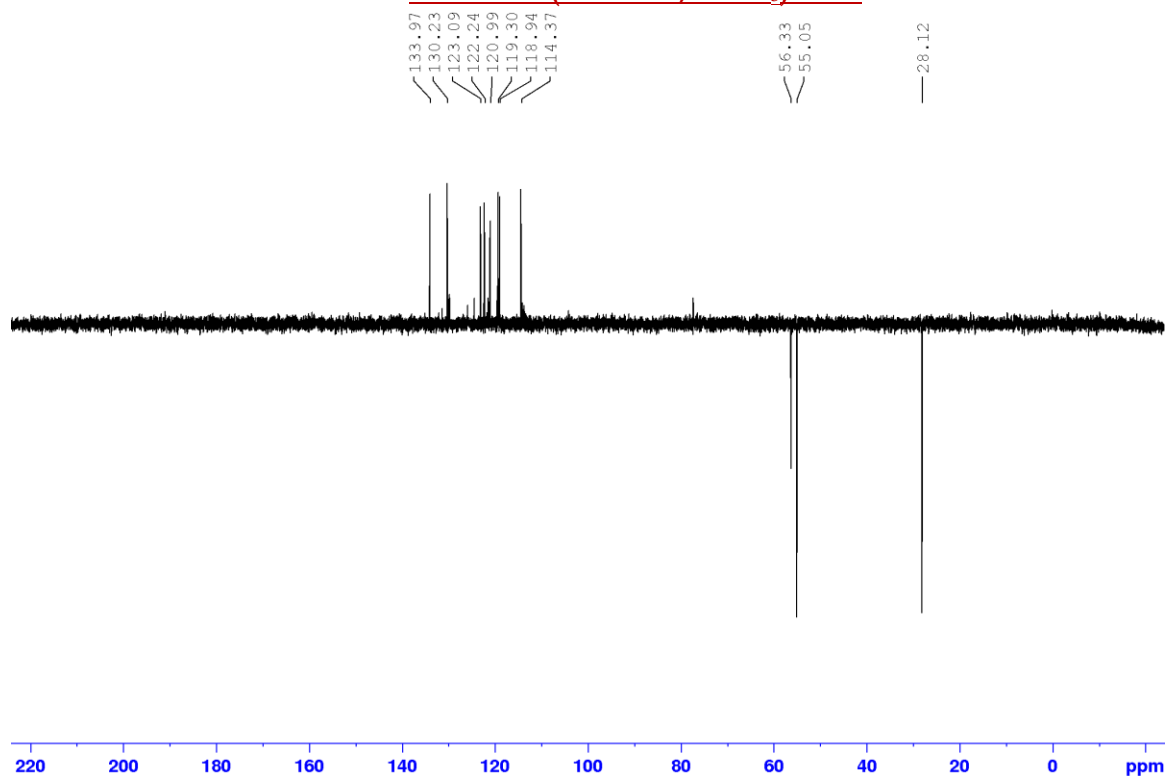

### HRMS of 3e

#### Elemental Composition Report

Page 1

#### Single Mass Analysis

Tolerance = 50.0 PPM / DBE: min = -1.5, max = 50.0

Element prediction: Off

Number of isotope peaks used for i-FIT = 3

Monoisotopic Mass, Even Electron Ions

34 formula(e) evaluated with 1 results within limits (up to 3 closest results for each mass)

Elements Used:

C: 0-18 H: 0-100 N: 0-4 O: 0-2 S: 0-1

SM-392

QMI DIVISION, CSIR-IIIM JAMMU  
Xevo G2-XS QTOF YFC2015

23-Apr-2024

12:52:14

1: TOF MS ES+

1.38e+006

230424\_17 4 (0.104)

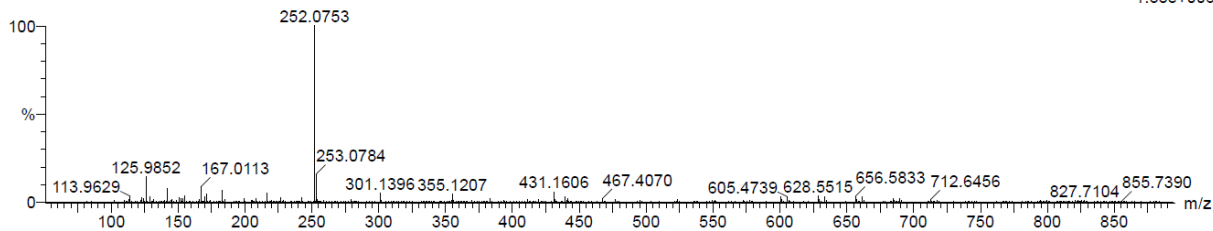

Minimum: -1.5  
Maximum: 2.0 50.0 50.0

| Mass     | Calc. Mass | mDa  | PPM  | DBE  | i-FIT  | Norm | Conf (%) | Formula         |
|----------|------------|------|------|------|--------|------|----------|-----------------|
| 355.1207 | 355.1229   | -2.2 | -6.2 | 11.5 | 1058.2 | n/a  | n/a      | C18 H19 N4 O2 S |

## Single Mass Analysis

Tolerance = 50.0 PPM / DBE: min = -1.5, max = 50.0

Element prediction: Off

Number of isotope peaks used for i-FIT = 3

Monoisotopic Mass, Even Electron Ions

16 formula(e) evaluated with 1 results within limits (up to 3 closest results for each mass)

Elements Used:

C: 0-14 H: 0-100 N: 0-3 O: 0-2

SM-392

QMI DIVISION, CSIR-IIIM JAMMU  
Xevo G2-XS QTOF YFC2015

23-Apr-2024

12:52:14

1: TOF MS ES+

2.66e+007

230424\_17 6 (0.138)

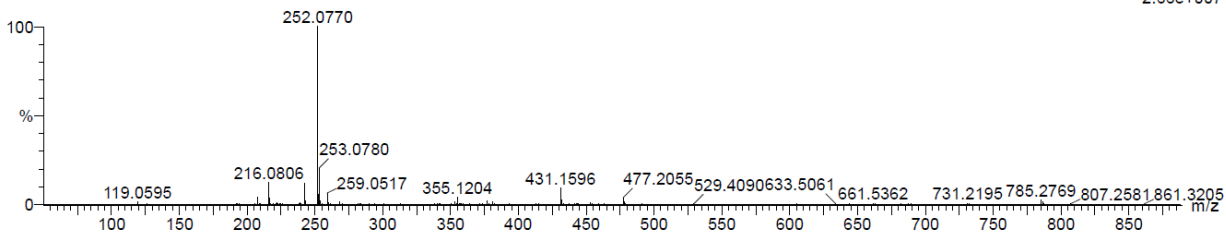Minimum: -1.5  
Maximum: 2.0 50.0 50.0

| Mass     | Calc. Mass | mDa  | PPM  | DBE  | i-FIT  | Norm | Conf (%) | Formula       |
|----------|------------|------|------|------|--------|------|----------|---------------|
| 252.0770 | 252.0773   | -0.3 | -1.2 | 11.5 | 1342.3 | n/a  | n/a      | C14 H10 N3 O2 |

**<sup>1</sup>H NMR (400 MHz, CDCl<sub>3</sub>) of 3f**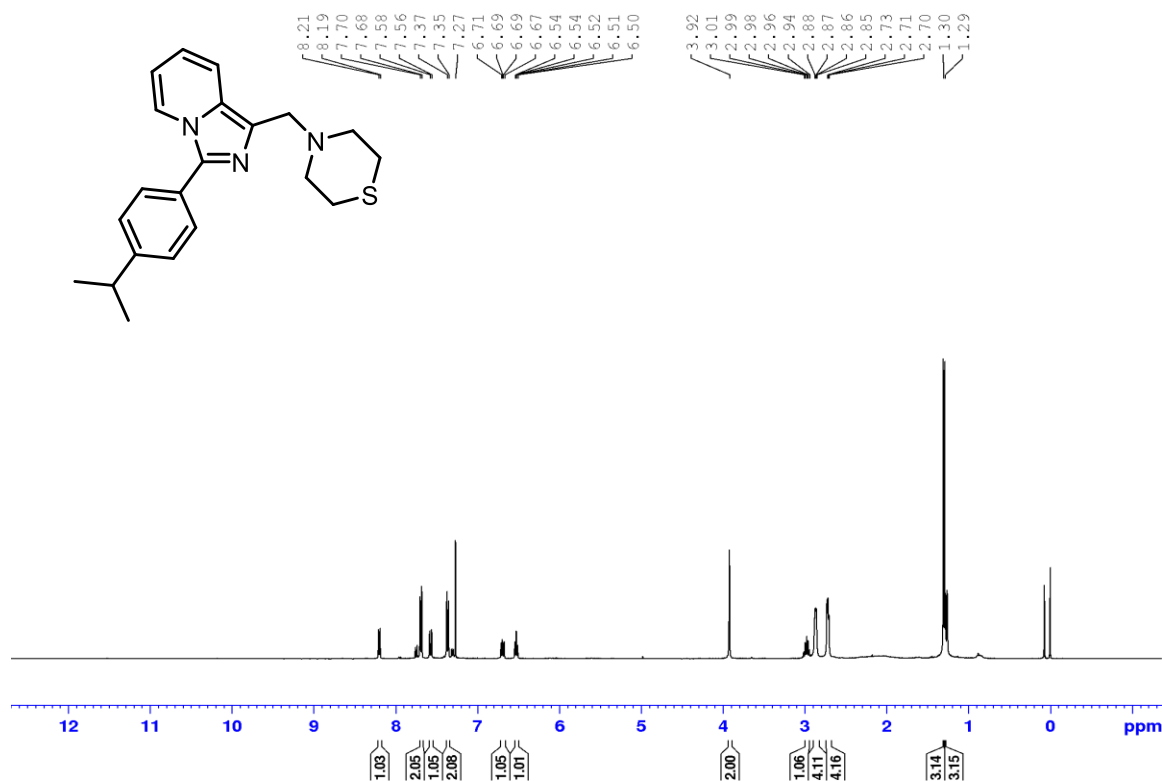

**$^{13}\text{C}\{^1\text{H}\}$  NMR (101 MHz,  $\text{CDCl}_3$ ) of 3f**

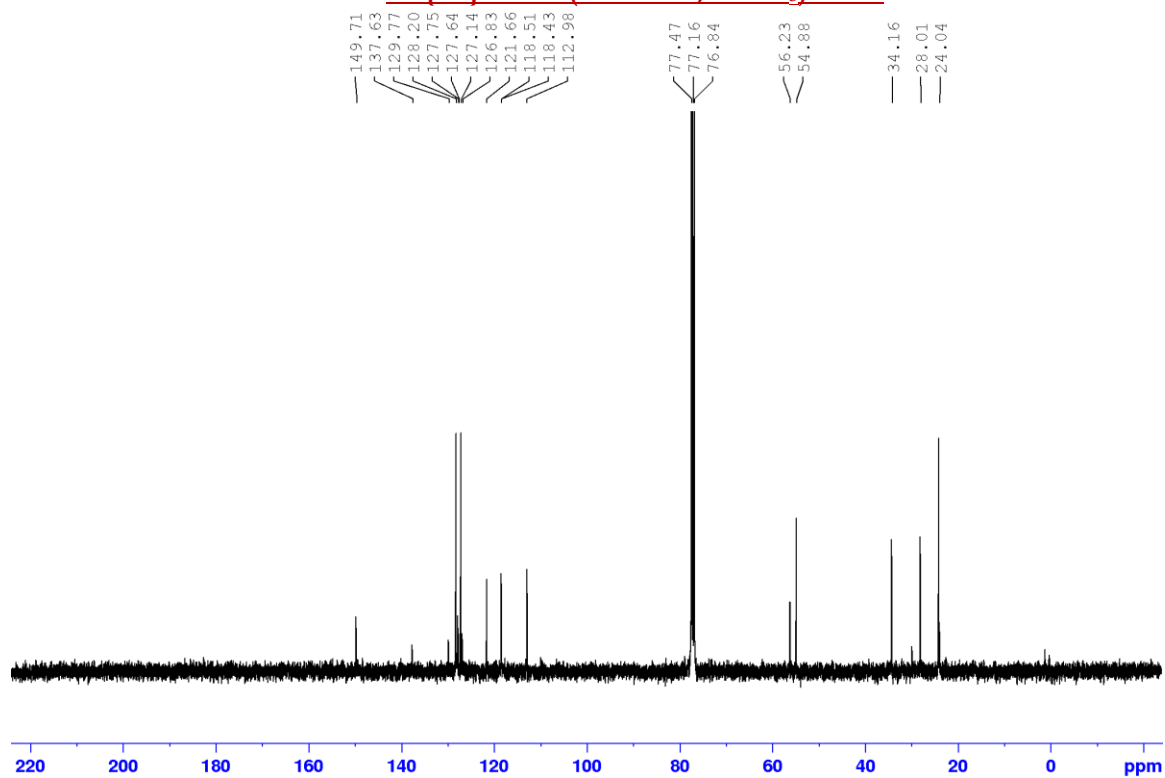

**DEPT-135 (400 MHz,  $\text{CDCl}_3$ ) of 3f**

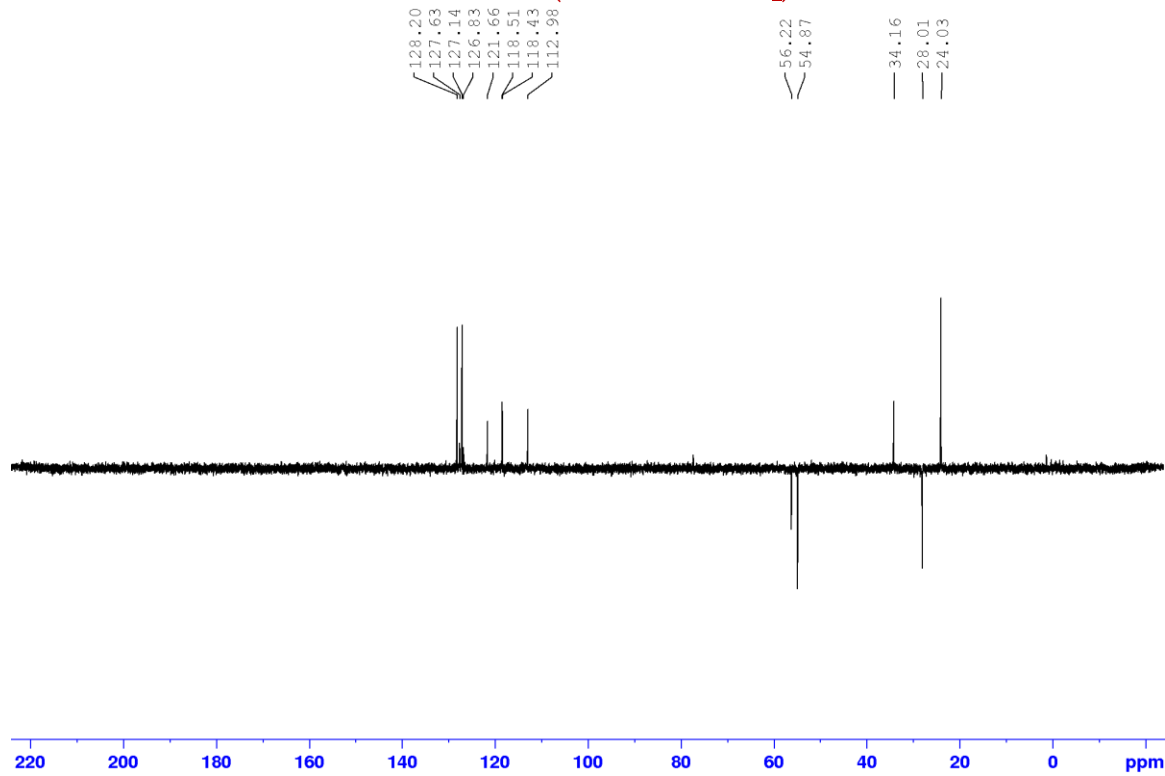

# HRMS of 3f

## Elemental Composition Report

Page 1

### Single Mass Analysis

Tolerance = 50.0 PPM / DBE: min = -1.5, max = 50.0

Element prediction: Off

Number of isotope peaks used for i-FIT = 3

Monoisotopic Mass, Even Electron Ions

11 formula(e) evaluated with 1 results within limits (up to 3 closest results for each mass)

Elements Used:

C: 0-21 H: 0-100 N: 0-3 S: 0-1

SM-396

QMI DIVISION, CSIR-IIIM JAMMU  
Xevo G2-XS QTOF YFC2015

07-May-2024

15:16:22

1: TOF MS ES+

6.97e+006

070524\_53 5 (0.121)

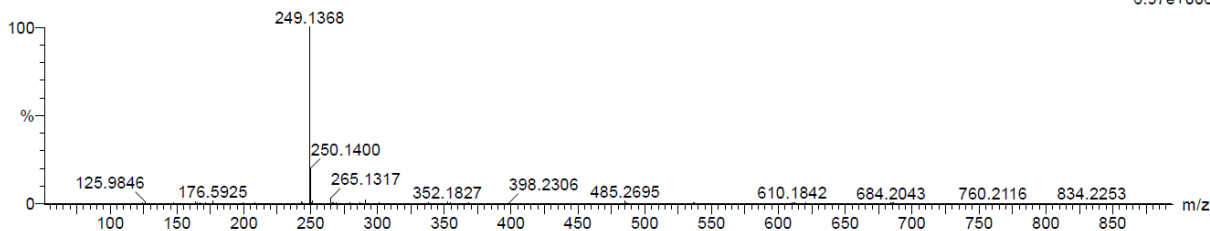

Minimum: -1.5  
Maximum: 2.0 50.0 50.0

| Mass     | Calc. Mass | mDa  | PPM  | DBE  | i-FIT | Norm | Conf (%) | Formula      |
|----------|------------|------|------|------|-------|------|----------|--------------|
| 352.1827 | 352.1847   | -2.0 | -5.7 | 10.5 | 891.0 | n/a  | n/a      | C21 H26 N3 S |

## Elemental Composition Report

Page 1

### Single Mass Analysis

Tolerance = 50.0 PPM / DBE: min = -1.5, max = 50.0

Element prediction: Off

Number of isotope peaks used for i-FIT = 3

Monoisotopic Mass, Even Electron Ions

6 formula(e) evaluated with 1 results within limits (up to 3 closest results for each mass)

Elements Used:

C: 0-17 H: 0-100 N: 0-2

SM-396

QMI DIVISION, CSIR-IIIM JAMMU  
Xevo G2-XS QTOF YFC2015

07-May-2024

15:16:22

1: TOF MS ES+

6.97e+006

070524\_53 5 (0.121)

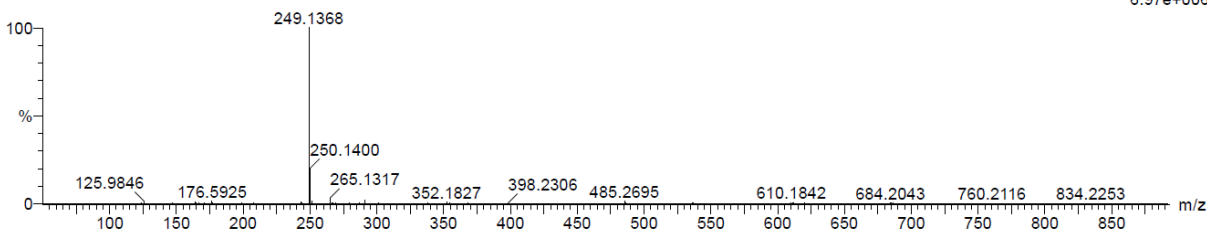

Minimum: -1.5  
Maximum: 2.0 50.0 50.0

| Mass     | Calc. Mass | mDa  | PPM  | DBE  | i-FIT  | Norm | Conf (%) | Formula    |
|----------|------------|------|------|------|--------|------|----------|------------|
| 249.1368 | 249.1392   | -2.4 | -9.6 | 10.5 | 1207.6 | n/a  | n/a      | C17 H17 N2 |

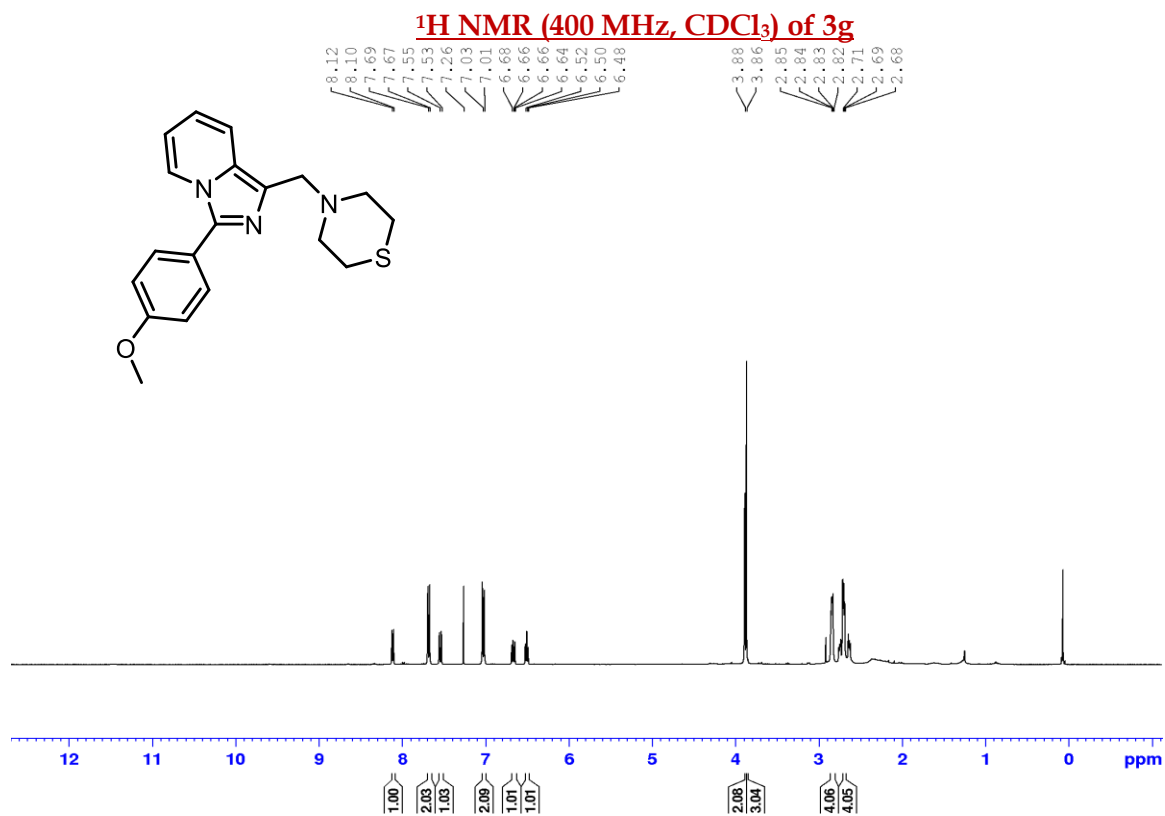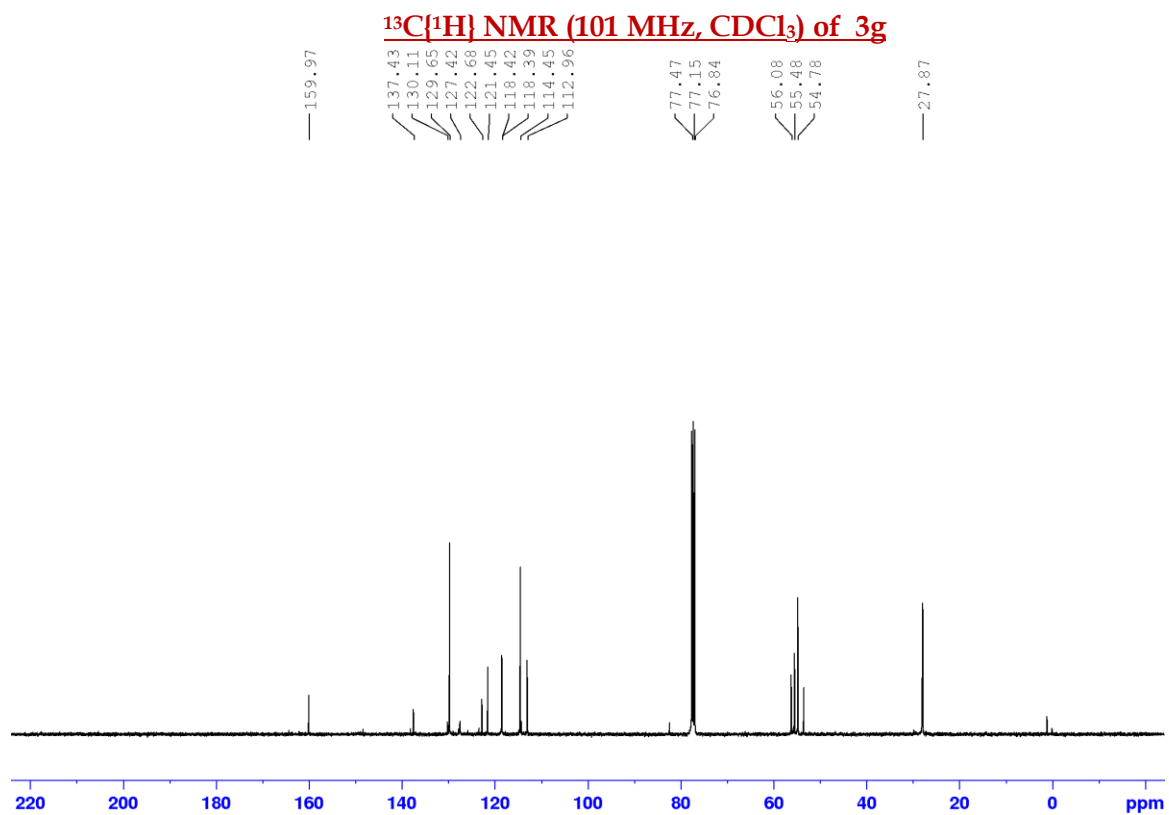

**DEPT-135 (400 MHz, CDCl<sub>3</sub>) of 3g**

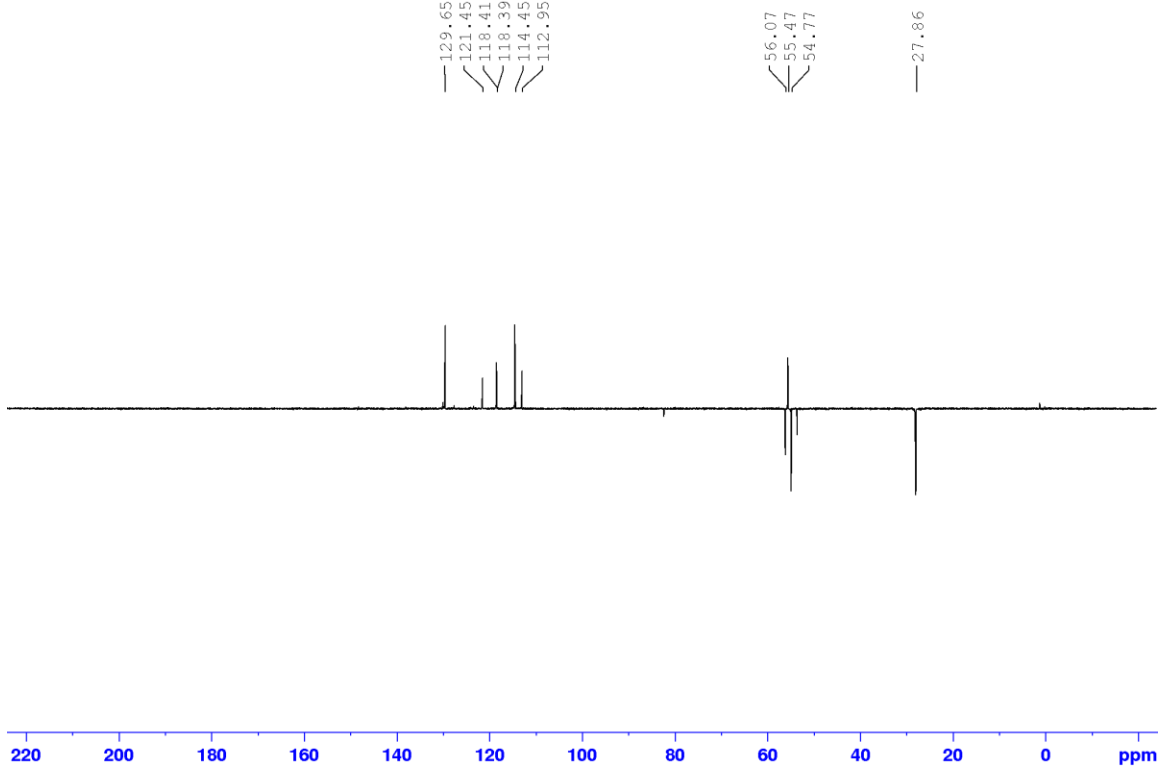

**HRMS of 3g**

**Elemental Composition Report**

**Single Mass Analysis**

Tolerance = 50.0 PPM / DBE: min = -1.5, max = 50.0

Element prediction: Off

Number of isotope peaks used for i-FIT = 3

Monoisotopic Mass, Even Electron Ions

20 formula(e) evaluated with 1 results within limits (up to 3 closest results for each mass)

Elements Used:

C: 0-19 H: 0-100 N: 0-3 O: 0-1 S: 0-1

SM-477

QMI DIVISION, CSIR-IIIM JAMMU  
Xevo G2-XS QTOF YFC2015

07-May-2024

15:24:04

1: TOF MS ES+

1.43e+007

070524\_56 5 (0.121)

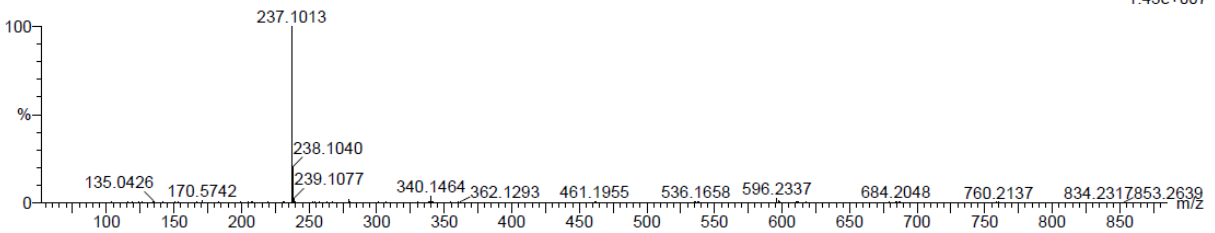

Minimum: -1.5  
Maximum: 2.0 50.0 50.0

| Mass     | Calc. Mass | mDa  | PEM  | DBE  | i-FIT | Norm | Conf(%) | Formula        |
|----------|------------|------|------|------|-------|------|---------|----------------|
| 340.1464 | 340.1484   | -2.0 | -5.9 | 10.5 | 976.8 | n/a  | n/a     | C19 H22 N3 O S |

Single Mass Analysis

Tolerance = 50.0 PPM / DBE: min = -1.5, max = 50.0

Element prediction: Off

Number of isotope peaks used for i-FIT = 3

Monoisotopic Mass, Even Electron Ions

10 formula(e) evaluated with 1 results within limits (up to 3 closest results for each mass)

Elements Used:

C: 0-15 H: 0-100 N: 0-2 O: 0-1

SM-477

QMI DIVISION, CSIR-IIIM JAMMU  
Xevo G2-XS QTOF YFC2015

23-Apr-2024

12:12:30

1: TOF MS ES+

3.40e+006

230424\_02 9 (0.208) Cm (9)

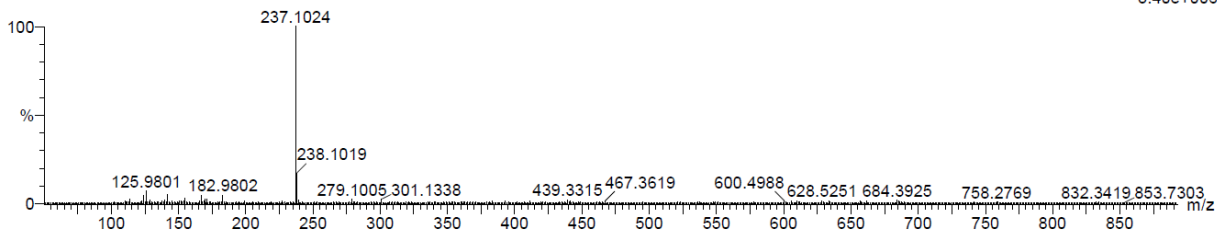

Minimum: -1.5  
Maximum: 2.0 50.0 50.0

| Mass     | Calc. Mass | mDa  | PPM  | DBE  | i-FIT | Norm | Conf (%) | Formula      |
|----------|------------|------|------|------|-------|------|----------|--------------|
| 237.1024 | 237.1028   | -0.4 | -1.7 | 10.5 | 46.3  | n/a  | n/a      | C15 H13 N2 O |

**<sup>1</sup>H NMR (400 MHz, CDCl<sub>3</sub>) of 3h**

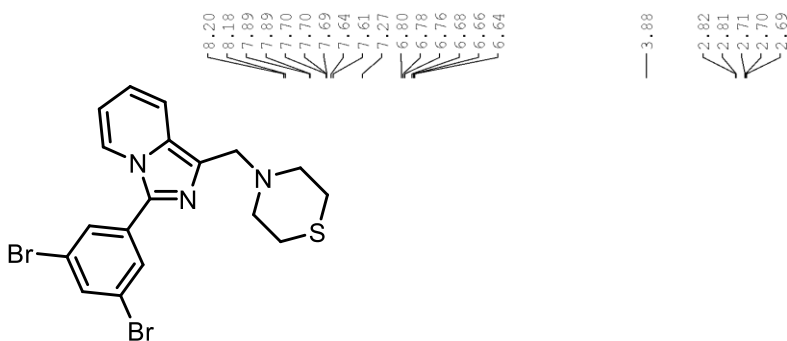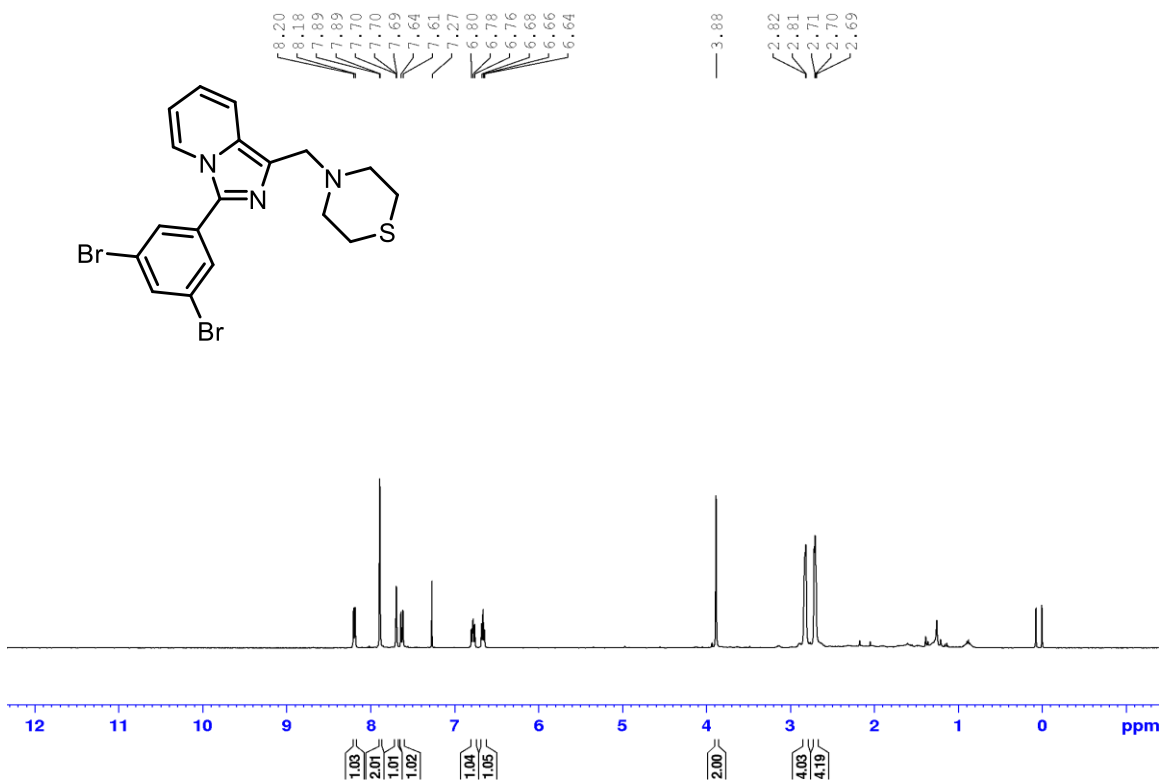



**$^{13}\text{C}\{^1\text{H}\}$  NMR (101 MHz,  $\text{CDCl}_3$ ) of 3h**

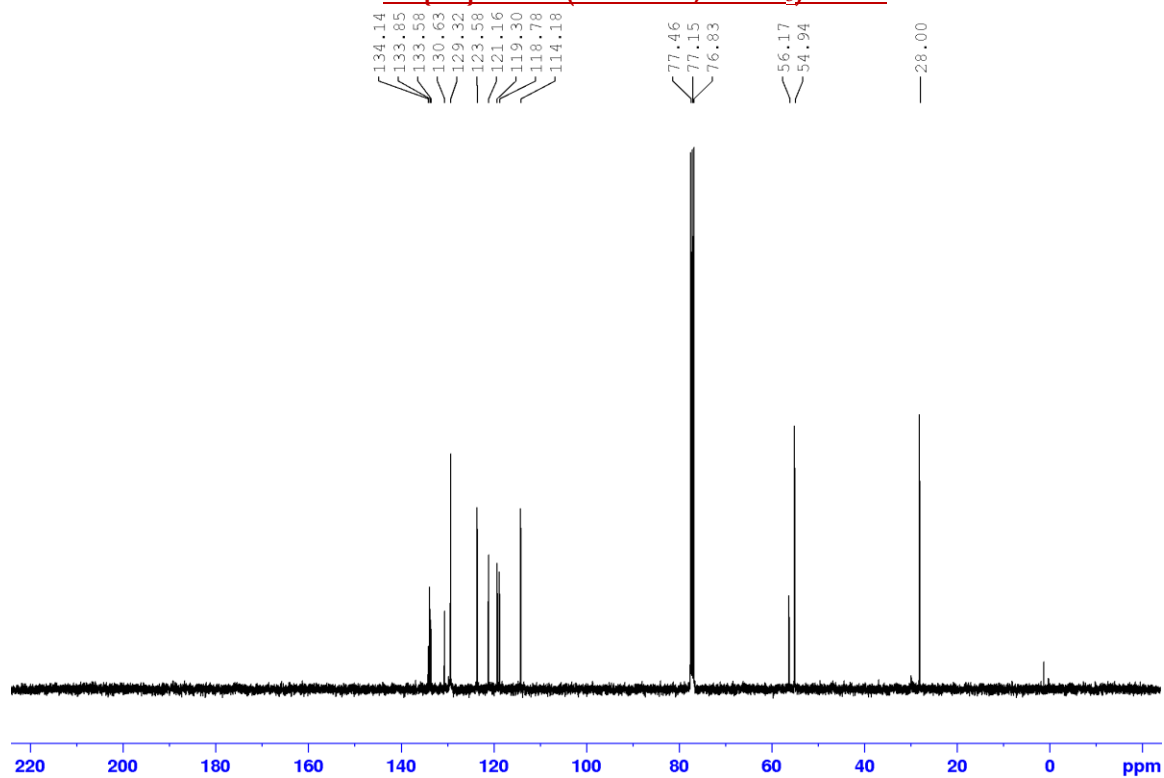

**DEPT-135 (400 MHz,  $\text{CDCl}_3$ ) of 3h**

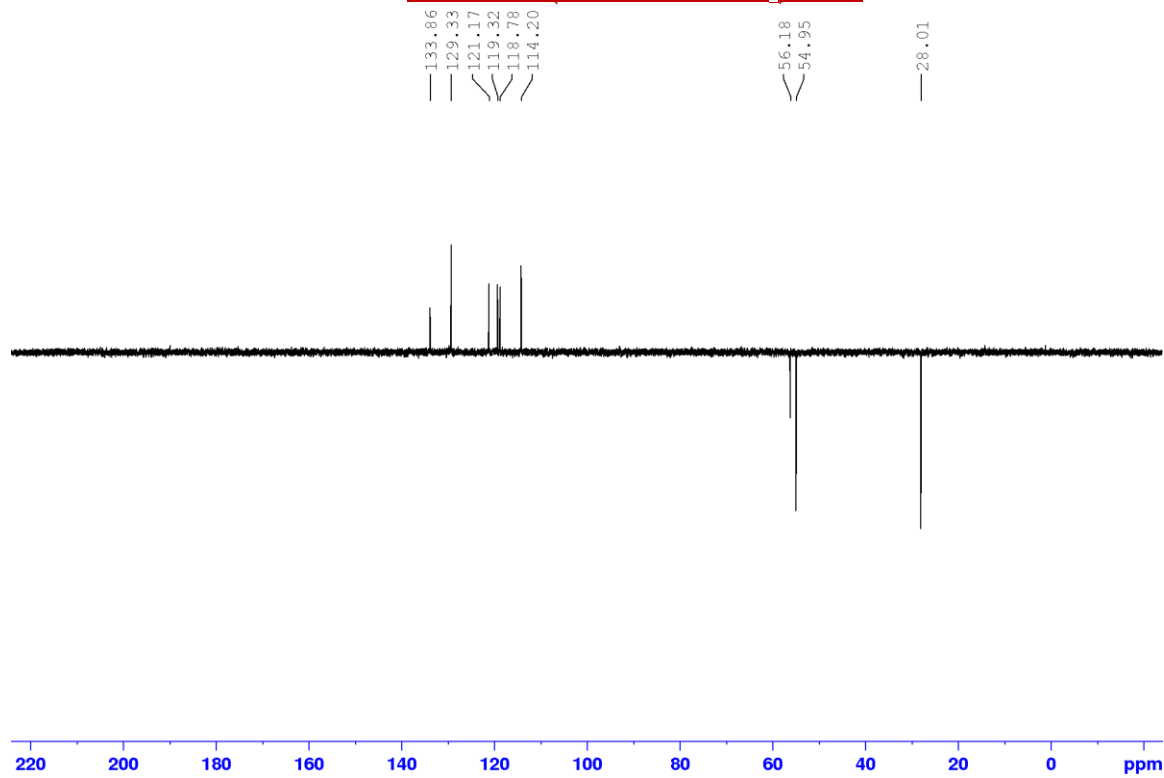

# HRMS of 3h

## Elemental Composition Report

Page 1

### Single Mass Analysis

Tolerance = 50.0 PPM / DBE: min = -1.5, max = 50.0

Element prediction: Off

Number of isotope peaks used for i-FIT = 3

Monoisotopic Mass, Even Electron Ions

12 formula(e) evaluated with 1 results within limits (up to 3 closest results for each mass)

Elements Used:

C: 0-14 H: 0-100 N: 0-2 Br: 0-2

SM-381

QMI DIVISION, CSIR-IIIM JAMMU  
Xevo G2-XS QTOF YFC2015

23-Apr-2024

230424\_14 5 (0.121)

12:43:52  
1: TOF MS ES+  
2.93e+007

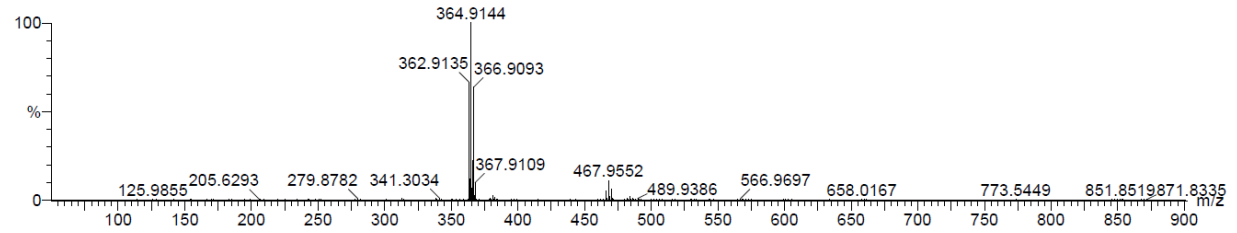

Minimum: -1.5  
Maximum: 2.0 50.0 50.0

| Mass     | Calc. Mass | mDa | PPM | DBE  | i-FIT  | Norm | Conf(%) | Formula       |
|----------|------------|-----|-----|------|--------|------|---------|---------------|
| 362.9135 | 362.9132   | 0.3 | 0.8 | 10.5 | 1191.1 | n/a  | n/a     | C14 H9 N2 Br2 |

### <sup>1</sup>H NMR (400 MHz, CDCl<sub>3</sub>) of 3i

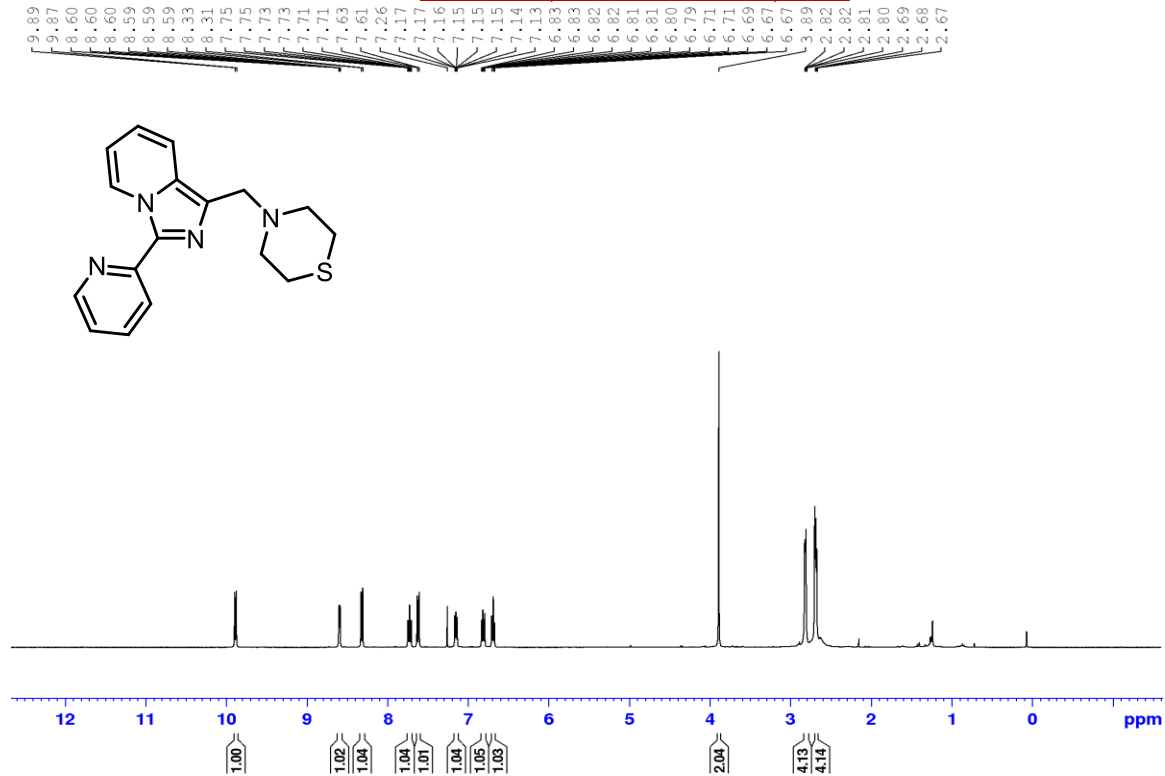

**$^{13}\text{C}\{^1\text{H}\}$  NMR (101 MHz,  $\text{CDCl}_3$ ) of 3i**

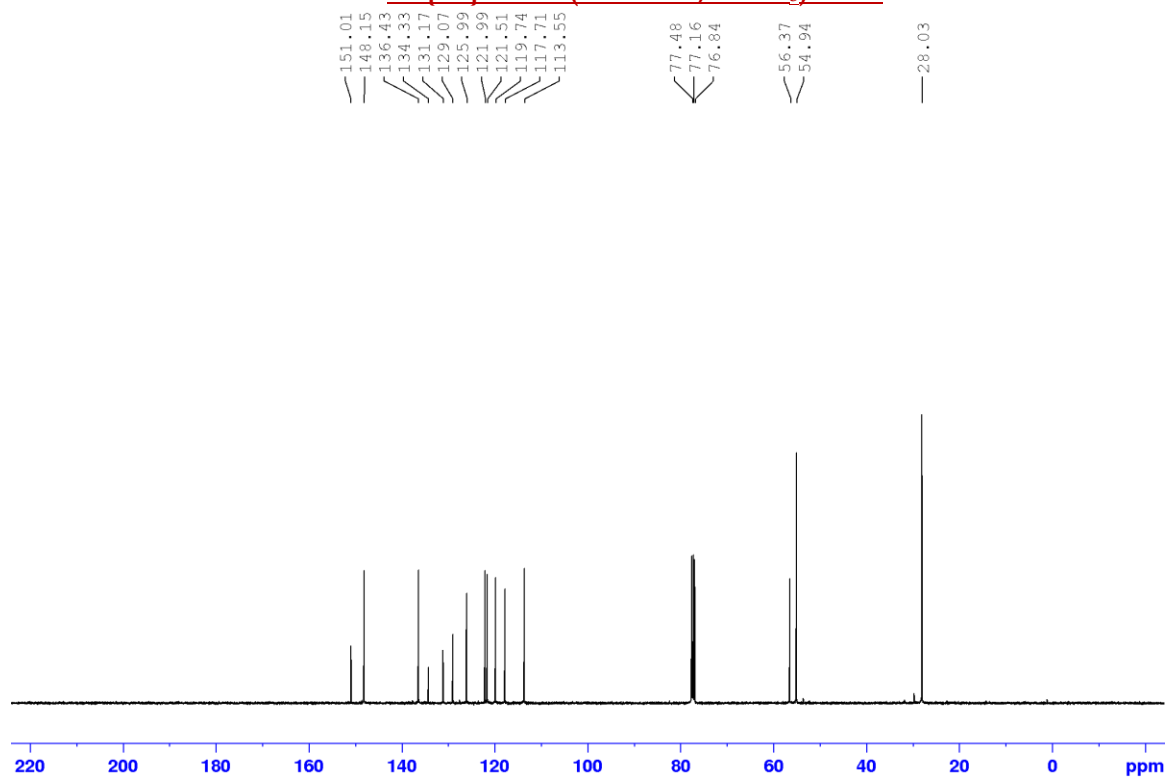

**DEPT-135 (101 MHz,  $\text{CDCl}_3$ ) of 3i**

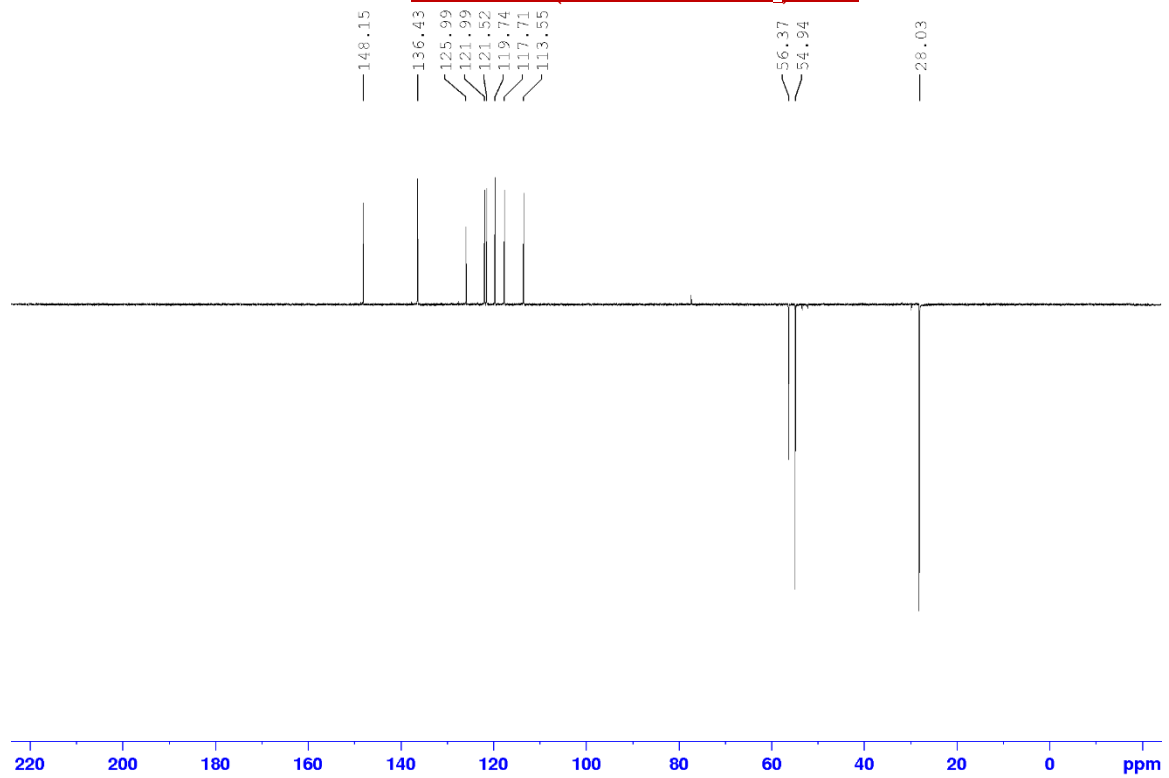

**HRMS of 3i**

**Elemental Composition Report**

**Single Mass Analysis**

Tolerance = 50.0 PPM / DBE: min = -1.5, max = 50.0  
Element prediction: Off  
Number of isotope peaks used for i-FIT = 3

Monoisotopic Mass, Even Electron Ions  
23 formula(e) evaluated with 1 results within limits (up to 3 closest results for each mass)  
Elements Used:

C: 0-17 H: 0-100 N: 0-4 Na: 0-1 S: 0-1

SM-402

QMI DIVISION, CSIR-IIIM JAMMU  
Xevo G2-XS QTOF YFC2015

23-Apr-2024

12:17:47

1: TOF MS ES+  
3.66e+007

230424\_04 5 (0.121)

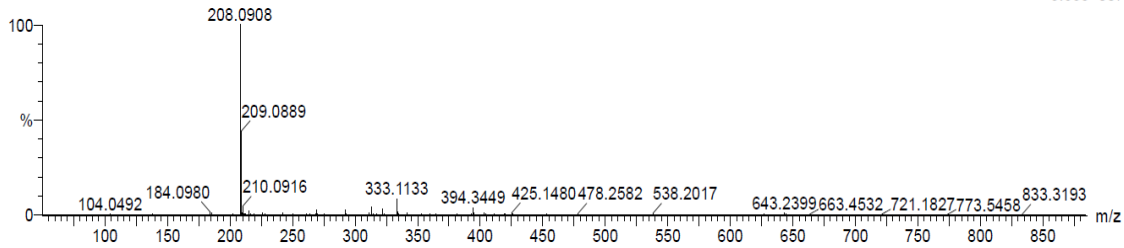

Minimum: -1.5  
Maximum: 2.0 50.0 50.0

| Mass     | Calc. Mass | mDa  | PPM  | DBE  | i-FIT  | Norm | Conf (%) | Formula         |
|----------|------------|------|------|------|--------|------|----------|-----------------|
| 333.1133 | 333.1150   | -1.7 | -5.1 | 10.5 | 1204.8 | n/a  | n/a      | C17 H18 N4 Na S |

**Elemental Composition Report**

**Single Mass Analysis**

Tolerance = 50.0 PPM / DBE: min = -1.5, max = 50.0  
Element prediction: Off  
Number of isotope peaks used for i-FIT = 3

Monoisotopic Mass, Even Electron Ions  
7 formula(e) evaluated with 1 results within limits (up to 3 closest results for each mass)  
Elements Used:

C: 0-13 H: 0-100 N: 0-3

SM-402

QMI DIVISION, CSIR-IIIM JAMMU  
Xevo G2-XS QTOF YFC2015

23-Apr-2024

12:17:47

1: TOF MS ES+  
4.08e+007

230424\_04 7 (0.155)

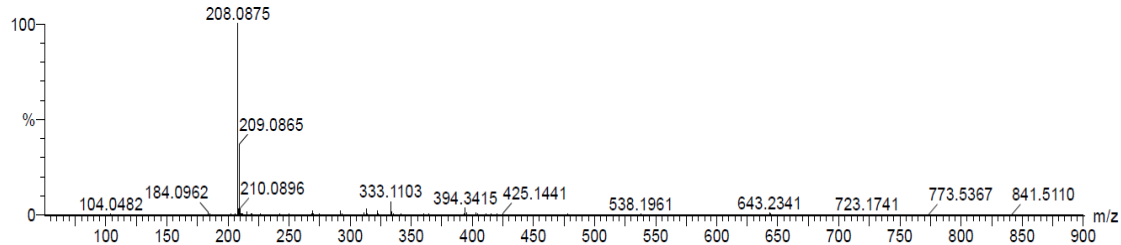

Minimum: -1.5  
Maximum: 2.0 50.0 50.0

| Mass     | Calc. Mass | mDa | PPM | DBE  | i-FIT  | Norm | Conf (%) | Formula    |
|----------|------------|-----|-----|------|--------|------|----------|------------|
| 208.0875 | 208.0875   | 0.0 | 0.0 | 10.5 | 1321.5 | n/a  | n/a      | C13 H10 N3 |

**<sup>1</sup>H NMR (400 MHz, CDCl<sub>3</sub>) of 3j**

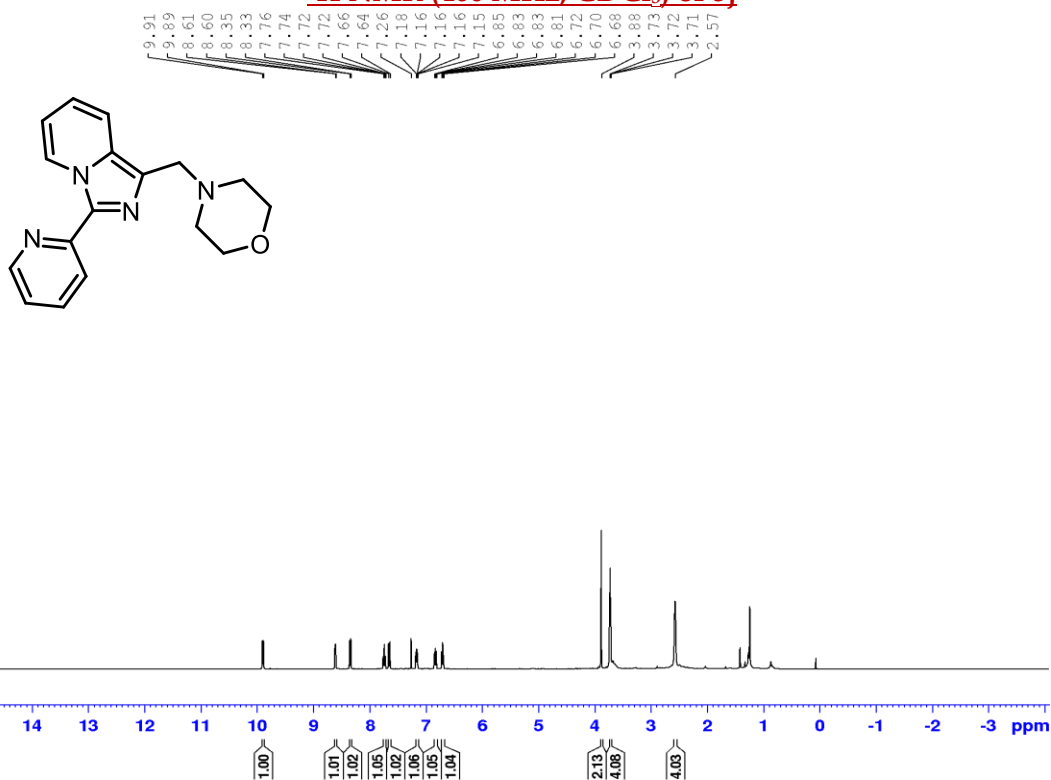

**<sup>13</sup>C[<sup>1</sup>H] NMR (101 MHz, CDCl<sub>3</sub>) of 3j**

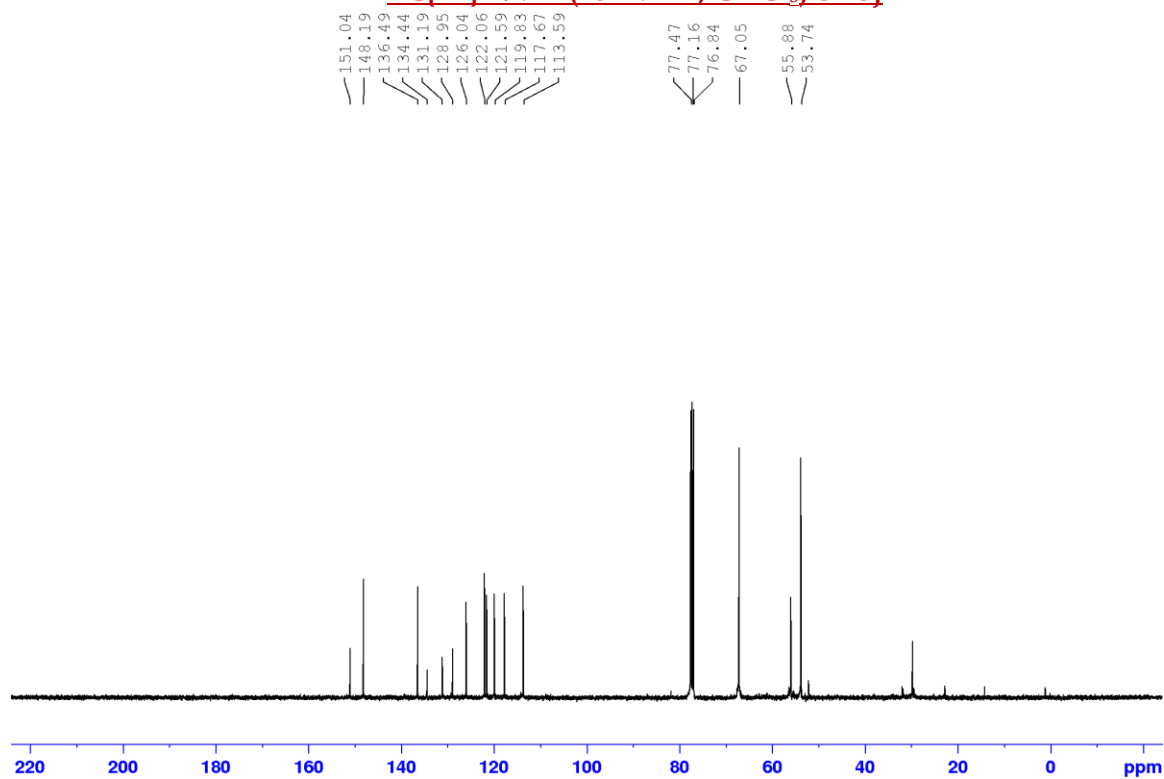

### DEPT-135 (400 MHz, CDCl<sub>3</sub>) of 3j

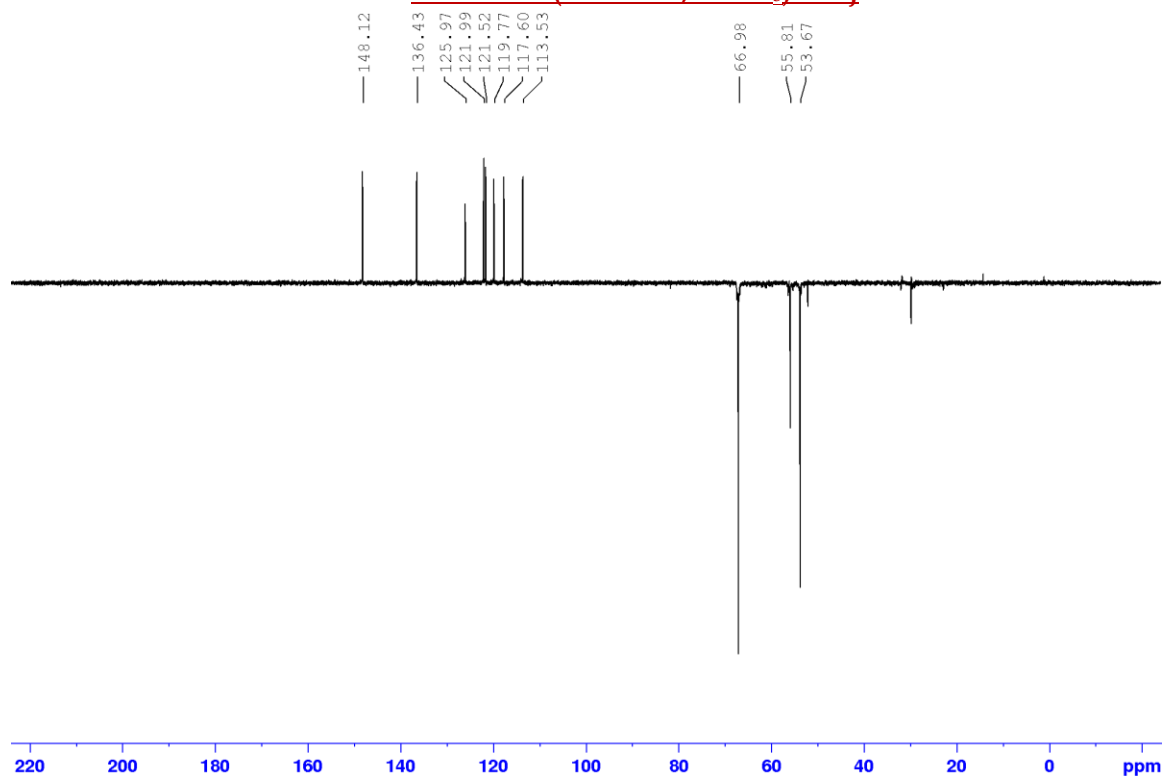

### HRMS of 3j

#### Elemental Composition Report

Page 1

#### Single Mass Analysis

Tolerance = 50.0 PPM / DBE: min = -1.5, max = 50.0

Element prediction: Off

Number of isotope peaks used for i-FIT = 3

Monoisotopic Mass, Even Electron Ions

24 formula(e) evaluated with 1 results within limits (up to 3 closest results for each mass)

Elements Used:

C: 0-17 H: 0-100 N: 0-4 O: 0-1 Na: 0-1

SM-484

QMI DIVISION, CSIR-IIIM JAMMU  
Xevo G2-XS QTOF YFC2015

23-Apr-2024

12:38:36

1: TOF MS ES+

8.96e+006

230424\_12 4 (0.104)

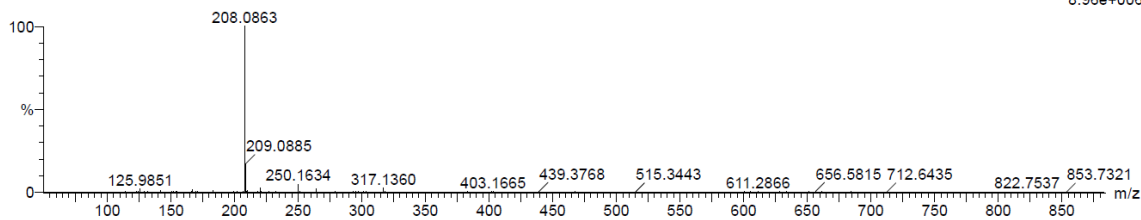

Minimum: -1.5  
Maximum: 2.0 50.0 50.0

| Mass     | Calc. Mass | mDa  | PPM  | DBE  | i-FIT  | Norm | Conf (%) | Formula         |
|----------|------------|------|------|------|--------|------|----------|-----------------|
| 317.1360 | 317.1378   | -1.8 | -5.7 | 10.5 | 1133.8 | n/a  | n/a      | C17 H18 N4 O Na |

## Single Mass Analysis

Tolerance = 50.0 PPM / DBE: min = -1.5, max = 50.0

Element prediction: Off

Number of isotope peaks used for i-FIT = 3

Monoisotopic Mass, Even Electron Ions

7 formula(e) evaluated with 1 results within limits (up to 3 closest results for each mass)

Elements Used:

C: 0-13 H: 0-100 N: 0-3

SM-484

QMI DIVISION, CSIR-IIIM JAMMU  
Xevo G2-XS QTOF YFC2015

23-Apr-2024

12:38:36

1: TOF MS ES+

4.75e+007

230424\_12.7 (0.155)

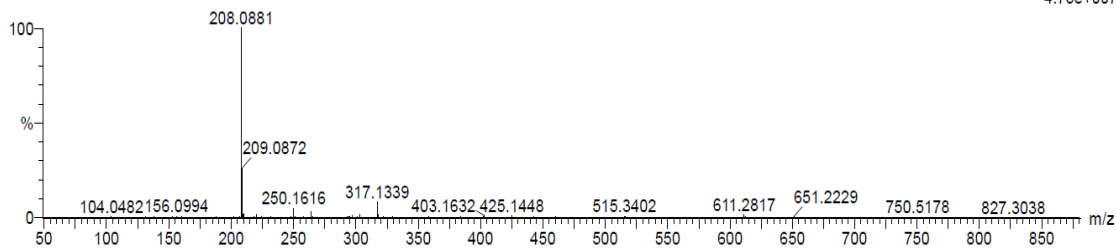Minimum: -1.5  
Maximum: 2.0 50.0 50.0

| Mass     | Calc. Mass | mDa | PPM | DBE  | i-FIT  | Norm | Conf (%) | Formula    |
|----------|------------|-----|-----|------|--------|------|----------|------------|
| 208.0881 | 208.0875   | 0.6 | 2.9 | 10.5 | 1545.5 | n/a  | n/a      | C13 H10 N3 |

**<sup>1</sup>H NMR (400 MHz, CDCl<sub>3</sub>) of 3k**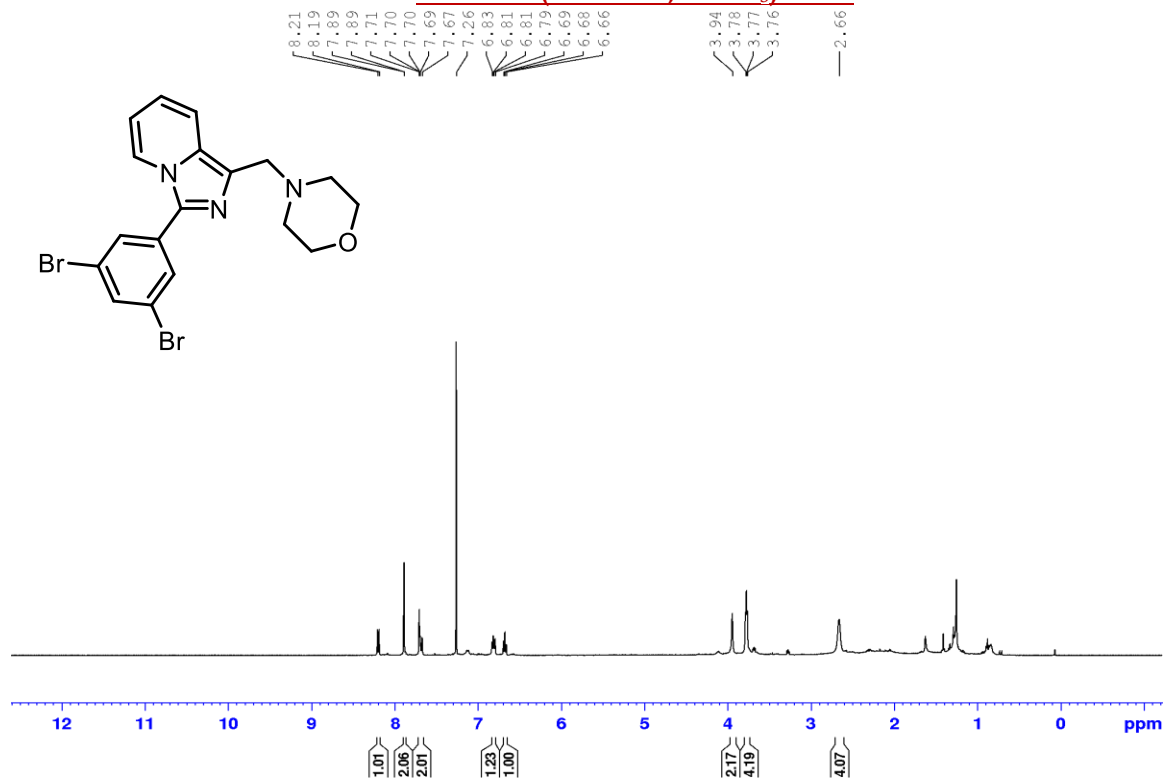

**$^{13}\text{C}\{^1\text{H}\}$  NMR (101 MHz,  $\text{CDCl}_3$ ) of 3k**

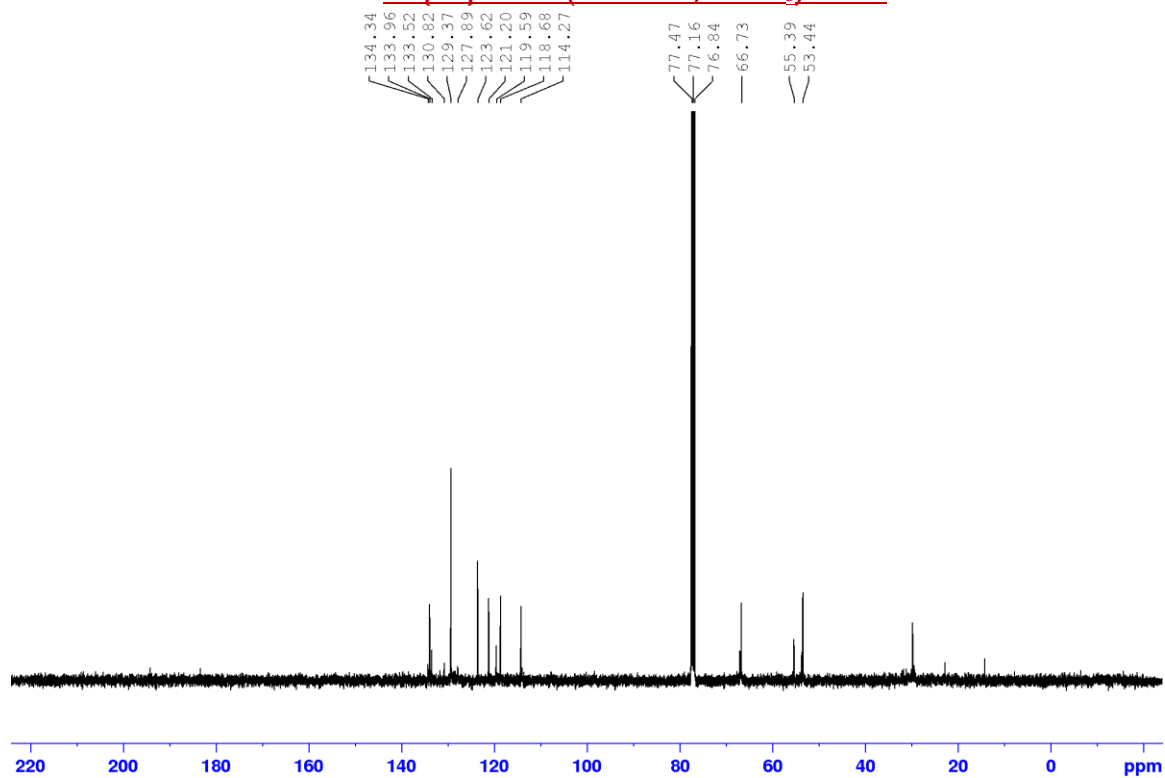

**DEPT-135 (400 MHz,  $\text{CDCl}_3$ ) of 3k**

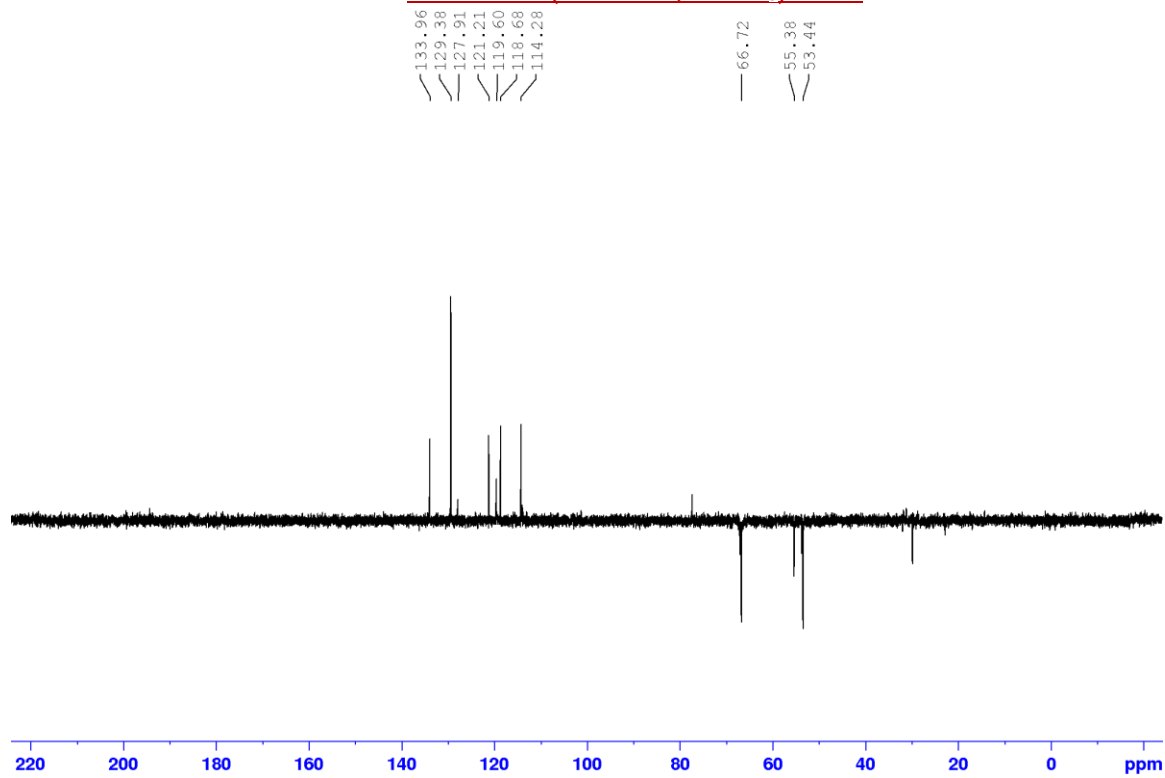



**HRMS of 3k**

**Elemental Composition Report**

**Single Mass Analysis**

Tolerance = 50.0 PPM / DBE: min = -1.5, max = 50.0  
Element prediction: Off  
Number of isotope peaks used for i-FIT = 3

Monoisotopic Mass, Even Electron Ions  
28 formula(e) evaluated with 1 results within limits (up to 3 closest results for each mass)  
Elements Used:  
C: 0-18 H: 0-100 N: 0-3 O: 0-1 Br: 0-2

SM-496 QMI DIVISION, CSIR-IIIM JAMMU 07-May-2024  
Xevo G2-XS QTOF YFC2015 15:34:36  
070524\_60 5 (0.121) 1: TOF MS ES+ 1.84e+006

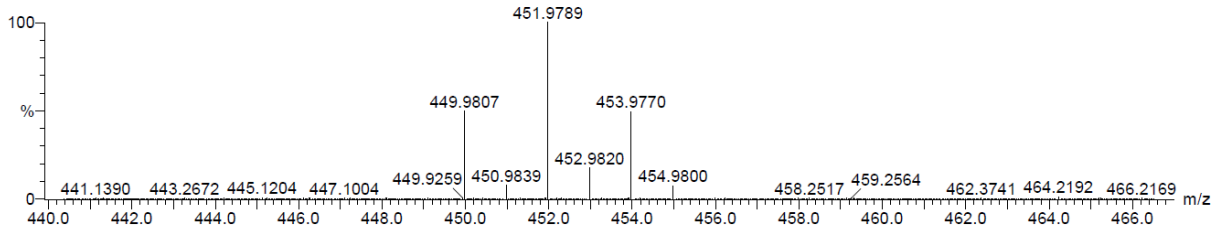

Minimum: -1.5  
Maximum: 2.0 50.0 50.0

| Mass     | Calc. Mass | mDa  | PPM  | DBE  | i-FIT | Norm | Conf (%) | Formula          |
|----------|------------|------|------|------|-------|------|----------|------------------|
| 449.9807 | 449.9817   | -1.0 | -2.2 | 10.5 | 924.5 | n/a  | n/a      | C18 H18 N3 O Br2 |

**Elemental Composition Report**

**Single Mass Analysis**

Tolerance = 50.0 PPM / DBE: min = -1.5, max = 50.0  
Element prediction: Off  
Number of isotope peaks used for i-FIT = 3

Monoisotopic Mass, Even Electron Ions  
12 formula(e) evaluated with 1 results within limits (up to 3 closest results for each mass)  
Elements Used:  
C: 0-14 H: 0-100 N: 0-2 Br: 0-2

SM-496 QMI DIVISION, CSIR-IIIM JAMMU 07-May-2024  
Xevo G2-XS QTOF YFC2015 15:34:36  
070524\_60 4 (0.104) 1: TOF MS ES+ 5.52e+005

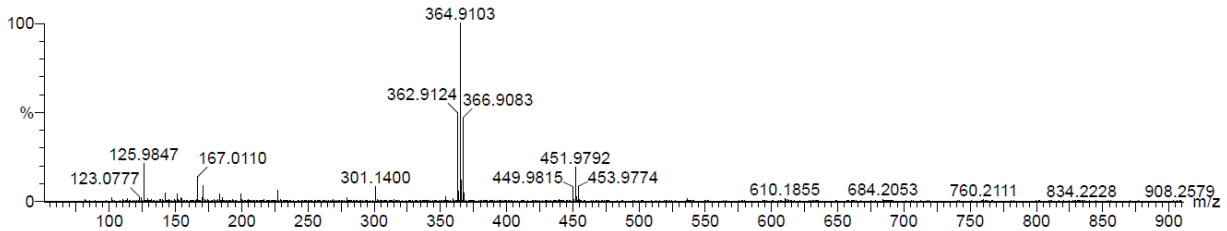

Minimum: -1.5  
Maximum: 2.0 50.0 50.0

| Mass     | Calc. Mass | mDa  | PPM  | DBE  | i-FIT | Norm | Conf (%) | Formula       |
|----------|------------|------|------|------|-------|------|----------|---------------|
| 362.9124 | 362.9132   | -0.8 | -2.2 | 10.5 | 805.1 | n/a  | n/a      | C14 H9 N2 Br2 |

**$^1\text{H}$  NMR (400 MHz,  $\text{CDCl}_3$ ) of 31**

8.12  
8.10  
7.56  
7.56  
7.54  
7.54  
7.53  
7.26  
7.22  
7.22  
7.21  
7.20  
7.20  
6.92  
6.92  
6.91  
6.90  
6.90  
6.89  
6.69  
6.68  
6.67  
6.66  
6.65  
6.65  
6.52  
6.52  
6.50  
6.50  
6.49  
6.48  
6.01  
6.00  
6.00  
3.86  
3.71  
2.59

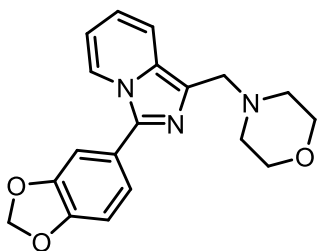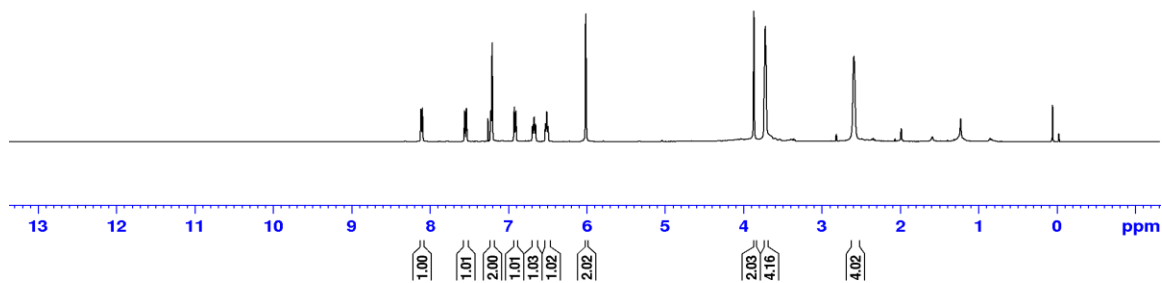

**$^{13}\text{C}\{^1\text{H}\}$  NMR (101 MHz,  $\text{CDCl}_3$ ) of 31**

148.15  
148.01  
137.11  
129.66  
127.27  
123.92  
122.04  
121.39  
118.46  
118.28  
113.03  
108.77  
108.74  
101.41  
77.43  
77.12  
76.80  
66.71  
55.33  
53.33

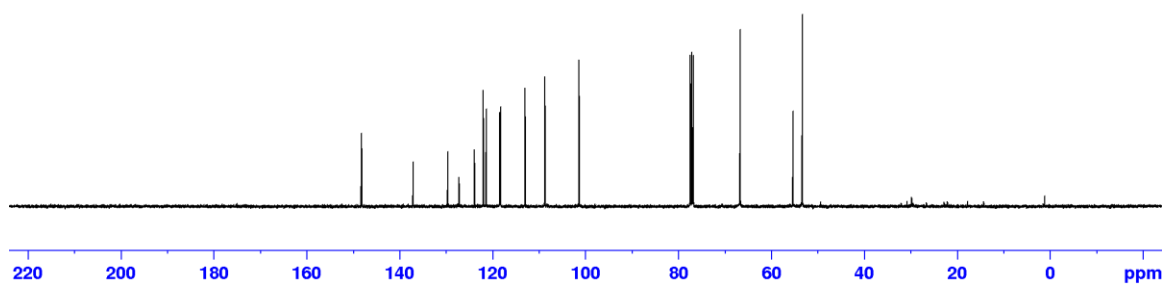

**DEPT-135 (400 MHz, CDCl<sub>3</sub>) of 3l**

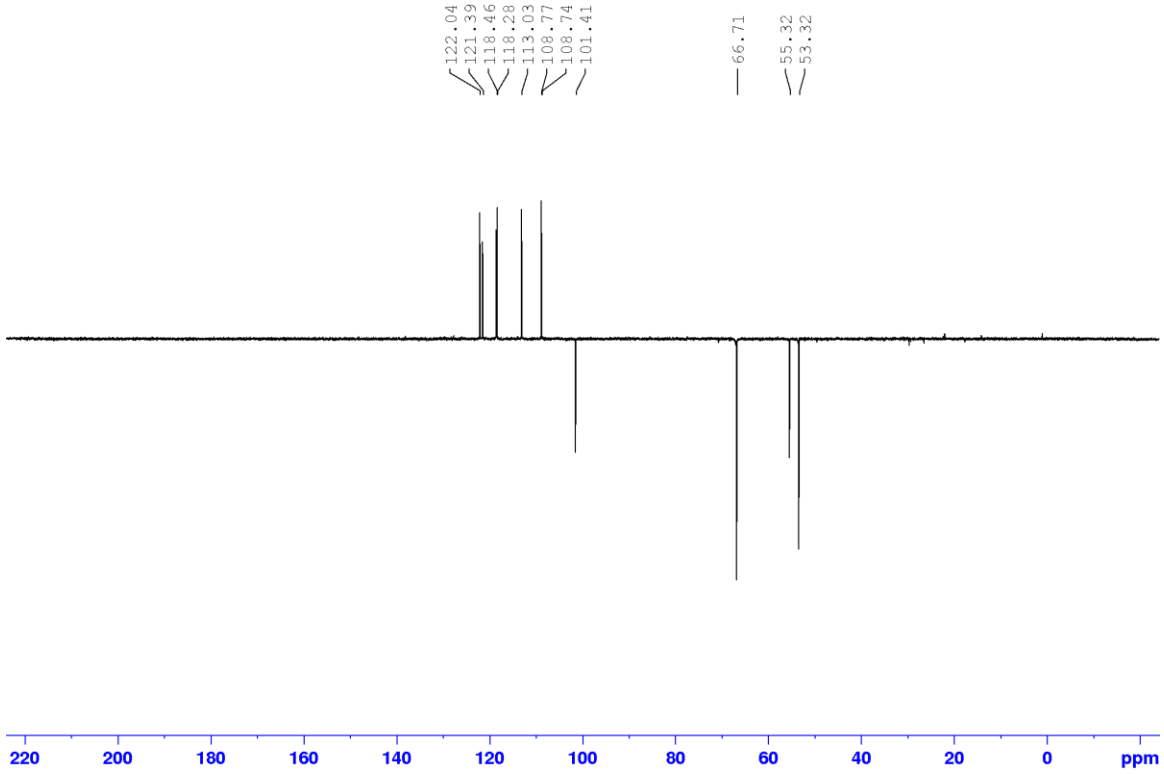

**HRMS of 3l**

**Elemental Composition Report**

Page 1

**Single Mass Analysis**

Tolerance = 50.0 PPM / DBE: min = -1.5, max = 50.0

Element prediction: Off

Number of isotope peaks used for i-FIT = 3

Monoisotopic Mass, Even Electron Ions

20 formula(e) evaluated with 1 results within limits (up to 3 closest results for each mass)

Elements Used:

C: 0-19 H: 0-100 N: 0-3 O: 0-3

SM-497

QMI DIVISION, CSIR-IIIM JAMMU  
Xevo G2-XS QTOF YFC2015

23-Apr-2024

12:30:44

1: TOF MS ES+

6.35e+006

230424\_09 4 (0.104)

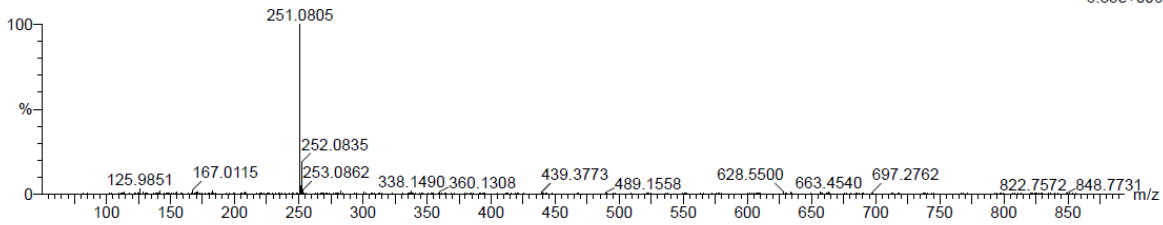

Minimum: -1.5

Maximum: 2.0 50.0 50.0

| Mass     | Calc. Mass | mDa  | PPM  | DBE  | i-FIT  | Norm | Conf (%) | Formula       |
|----------|------------|------|------|------|--------|------|----------|---------------|
| 338.1490 | 338.1505   | -1.5 | -4.4 | 11.5 | 1206.1 | n/a  | n/a      | C19 H20 N3 O3 |

# Elemental Composition Report

## Single Mass Analysis

Tolerance = 50.0 PPM / DBE: min = -1.5, max = 50.0

Element prediction: Off

Number of isotope peaks used for i-FIT = 3

Monoisotopic Mass, Even Electron Ions

13 formula(e) evaluated with 1 results within limits (up to 3 closest results for each mass)

Elements Used:

C: 0-15 H: 0-100 N: 0-2 O: 0-2

SM-497

QMI DIVISION, CSIR-IIIM JAMMU  
Xevo G2-XS QTOF YFC2015

23-Apr-2024

12:30:44

1: TOF MS ES+

3.52e+007

230424\_09 7 (0.155)

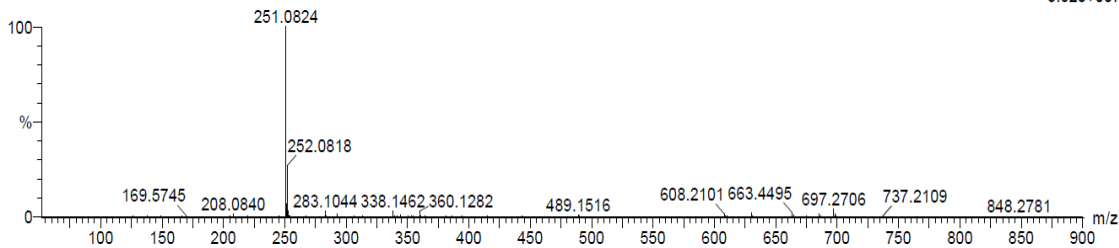

Minimum: -1.5  
Maximum: 2.0 50.0 50.0

| Mass     | Calc. Mass | mDa | PPM | DBE  | i-FIT  | Norm | Conf (%) | Formula       |
|----------|------------|-----|-----|------|--------|------|----------|---------------|
| 251.0824 | 251.0821   | 0.3 | 1.2 | 11.5 | 1366.5 | n/a  | n/a      | C15 H11 N2 O2 |

## <sup>1</sup>H NMR (400 MHz, CDCl<sub>3</sub>) of 3m

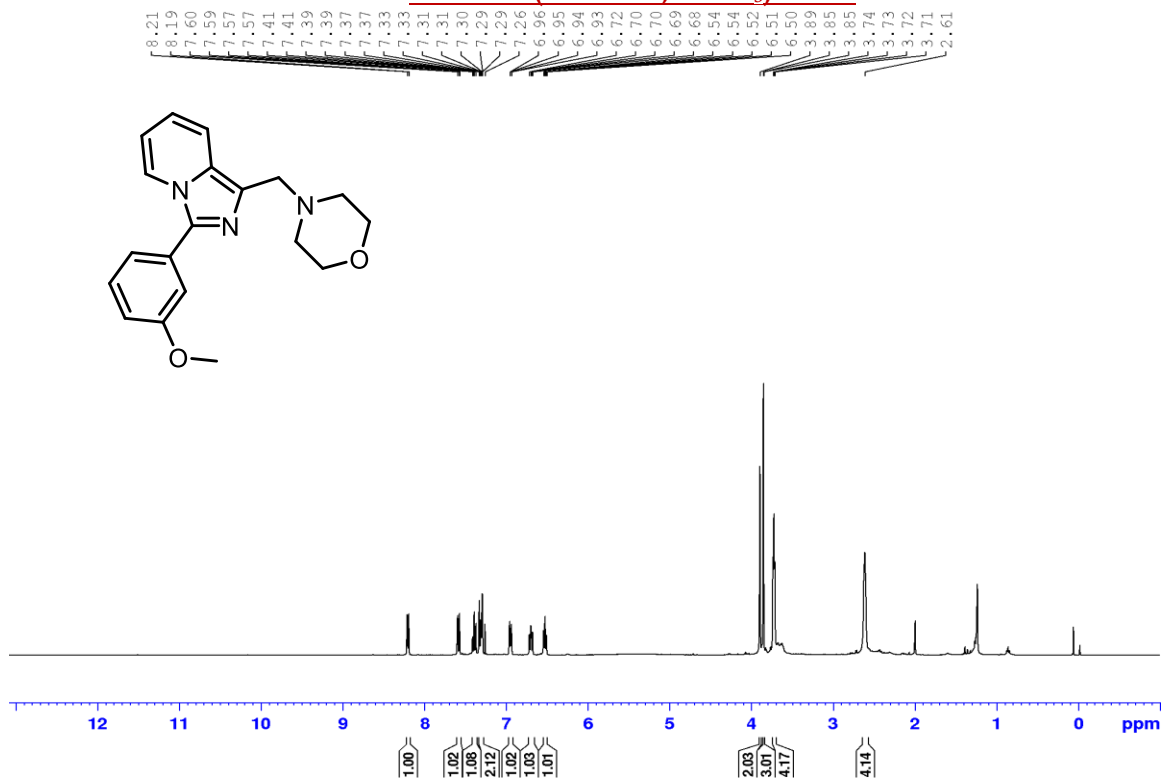

**$^{13}\text{C}\{^1\text{H}\}$  NMR (101 MHz,  $\text{CDCl}_3$ ) of 3m**

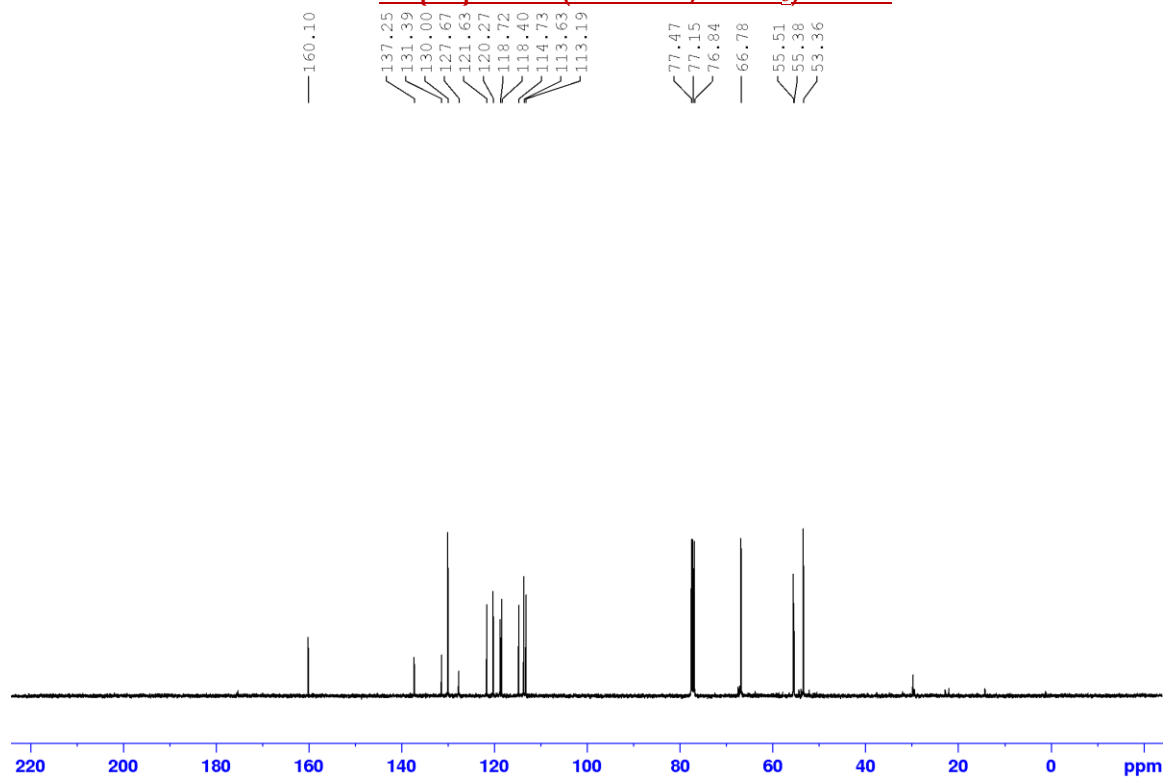

**DEPT-135 (400 MHz,  $\text{CDCl}_3$ ) of 3m**

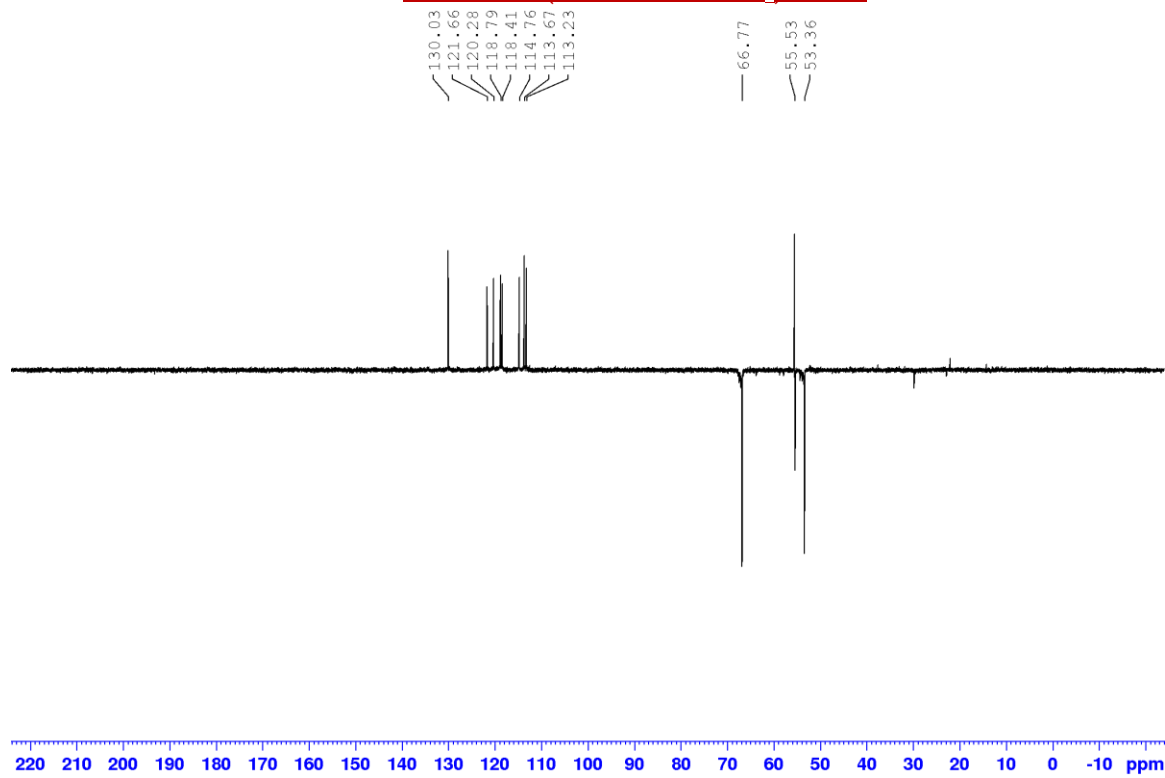

**HRMS of 3m**

**Elemental Composition Report**

**Single Mass Analysis**

Tolerance = 50.0 PPM / DBE: min = -1.5, max = 50.0  
Element prediction: Off  
Number of isotope peaks used for i-FIT = 3

Monoisotopic Mass, Even Electron Ions  
26 formula(e) evaluated with 1 results within limits (up to 3 closest results for each mass)  
Elements Used:  
C: 0-19 H: 0-100 N: 0-3 O: 0-3  
SM-498

QMI DIVISION, CSIR-IIIM JAMMU  
Xevo G2-XS QTOF YFC2015

07-May-2024  
15:39:45  
1: TOF MS ES+  
1.96e+007

070524\_62 5 (0.121)

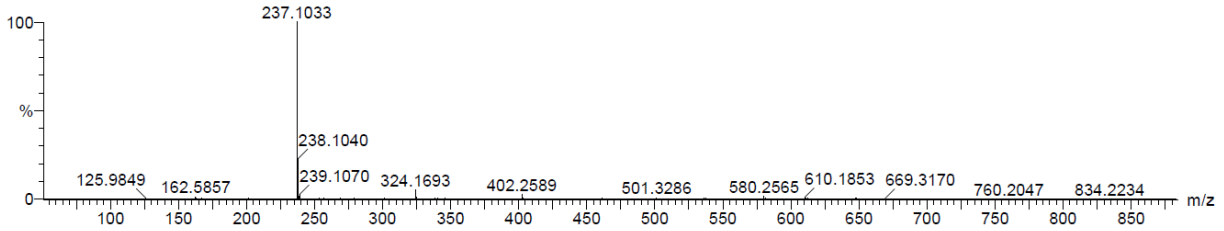

Minimum: -1.5  
Maximum: 2.0 50.0 50.0

| Mass     | Calc. Mass | mDa  | PPM  | DBE  | i-FIT  | Norm | Conf (%) | Formula       |
|----------|------------|------|------|------|--------|------|----------|---------------|
| 324.1693 | 324.1712   | -1.9 | -5.9 | 10.5 | 1034.0 | n/a  | n/a      | C19 H22 N3 O2 |

**Elemental Composition Report**

**Single Mass Analysis**

Tolerance = 50.0 PPM / DBE: min = -1.5, max = 50.0  
Element prediction: Off  
Number of isotope peaks used for i-FIT = 3

Monoisotopic Mass, Even Electron Ions  
26 formula(e) evaluated with 1 results within limits (up to 3 closest results for each mass)  
Elements Used:  
C: 0-19 H: 0-100 N: 0-3 O: 0-3  
SM-498

QMI DIVISION, CSIR-IIIM JAMMU  
Xevo G2-XS QTOF YFC2015

07-May-2024  
15:39:45  
1: TOF MS ES+  
1.96e+007

070524\_62 5 (0.121)

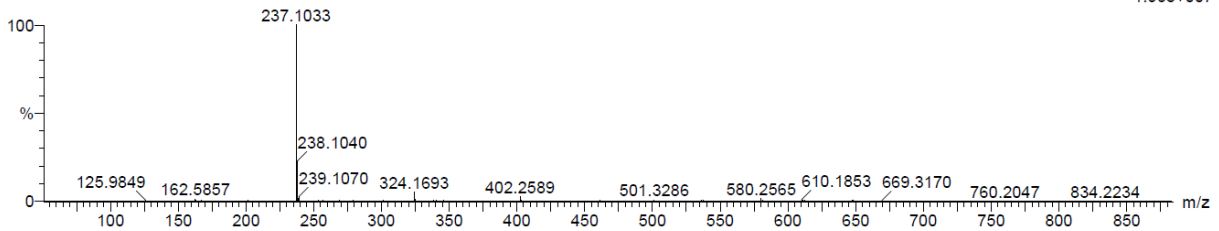

Minimum: -1.5  
Maximum: 2.0 50.0 50.0

| Mass     | Calc. Mass | mDa  | PPM  | DBE  | i-FIT  | Norm | Conf (%) | Formula       |
|----------|------------|------|------|------|--------|------|----------|---------------|
| 324.1693 | 324.1712   | -1.9 | -5.9 | 10.5 | 1034.0 | n/a  | n/a      | C19 H22 N3 O2 |

**<sup>1</sup>H NMR (400 MHz, CDCl<sub>3</sub>) of 3n**

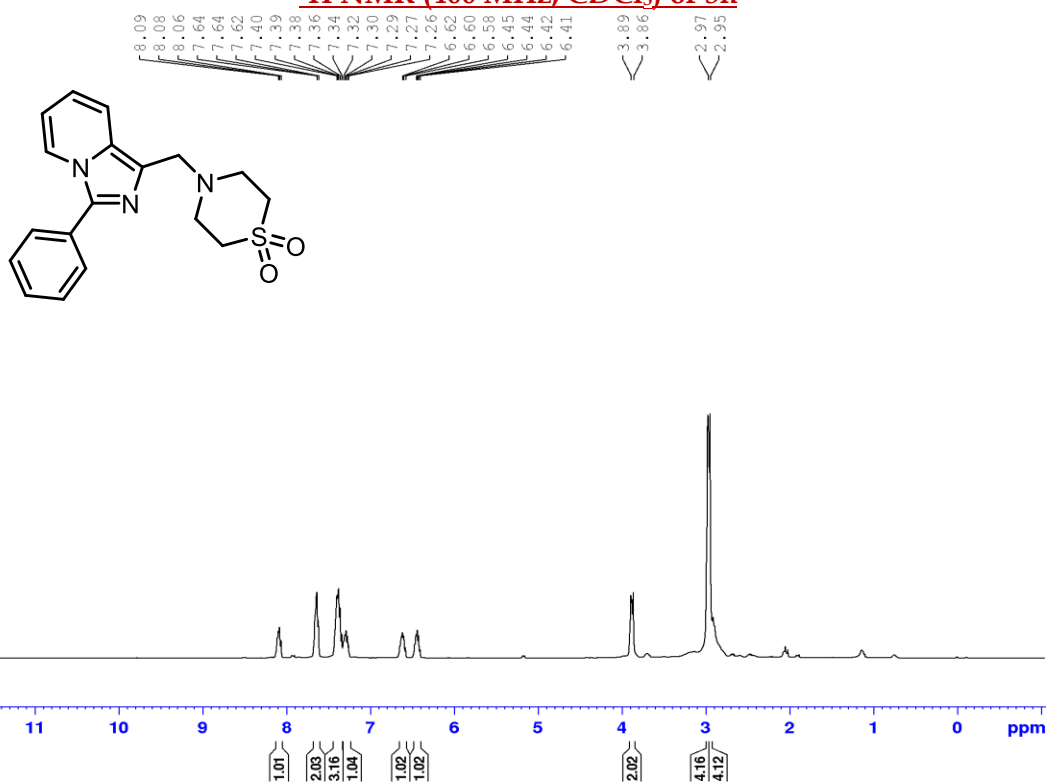

**<sup>13</sup>C{<sup>1</sup>H} NMR (101 MHz, CDCl<sub>3</sub>) of 3n**

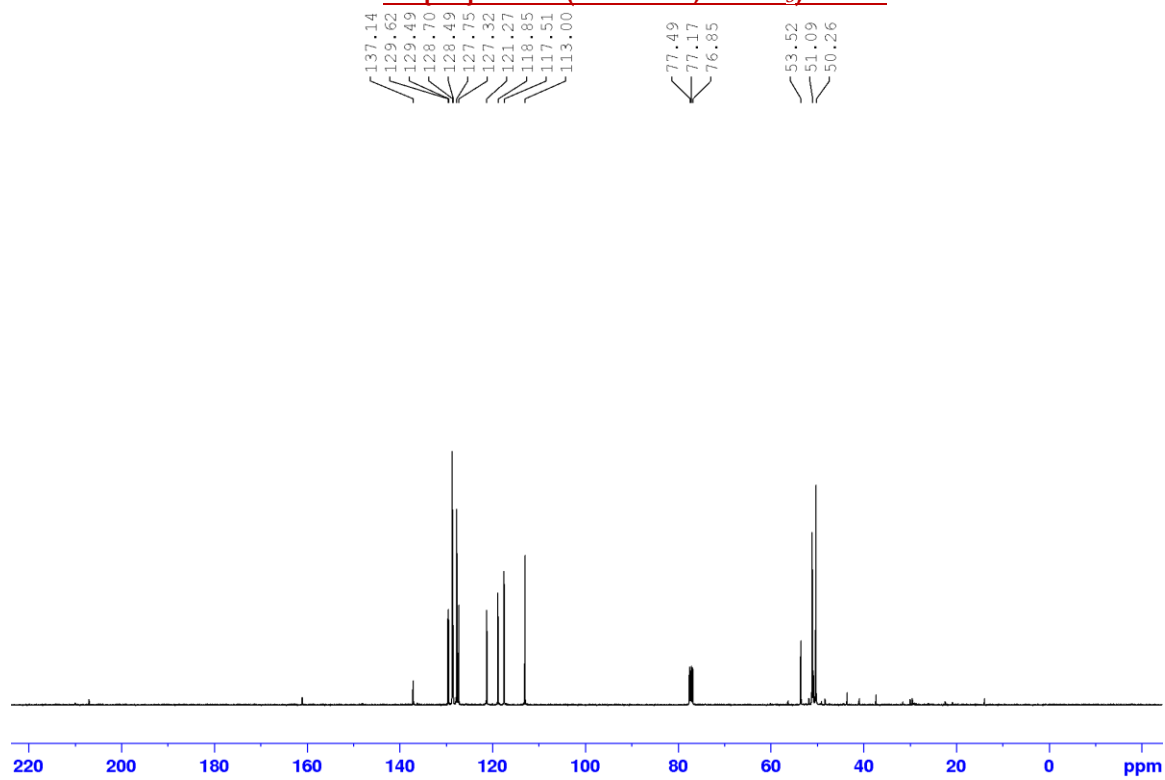

**DEPT-135 (400 MHz, CDCl<sub>3</sub>) of 3n**

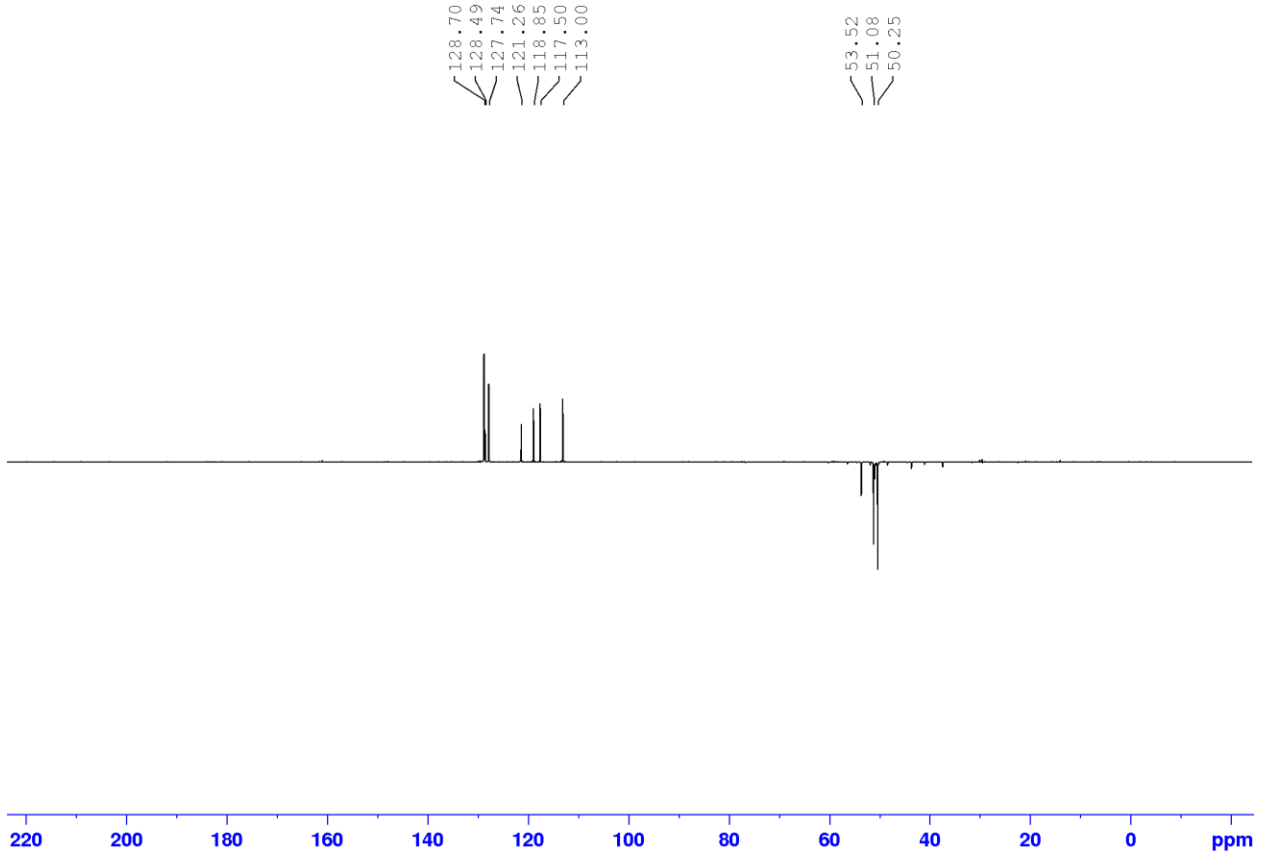

**HRMS of 3n**

**Elemental Composition Report**

**Single Mass Analysis**

Tolerance = 50.0 PPM / DBE: min = -1.5, max = 50.0

Element prediction: Off

Number of isotope peaks used for i-FIT = 3

Monoisotopic Mass, Even Electron Ions

52 formula(e) evaluated with 1 results within limits (up to 3 closest results for each mass)

Elements Used:

C: 0-18 H: 0-100 N: 0-3 O: 0-2 S: 0-1 Na: 0-1

SM-384

QMI DIVISION, CSIR-IIIM JAMMU  
Xevo G2-XS QTOF YFC2015

23-Apr-2024

13:02:49

230424\_21 4 (0.104)

1: TOF MS ES+  
6.28e+006

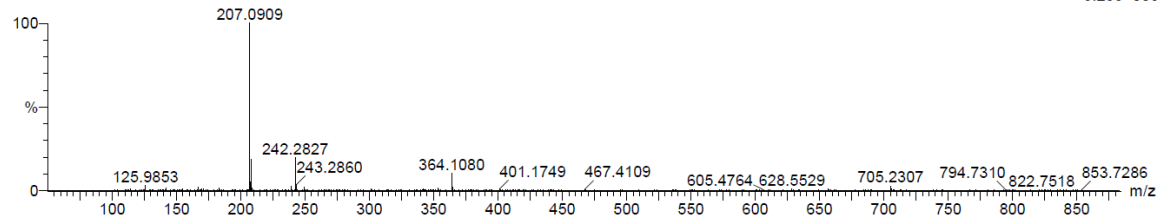

Minimum: -1.5  
Maximum: 2.0 50.0 50.0

| Mass     | Calc. Mass | mDa  | PPM  | DBE  | i-FIT  | Norm | Conf (%) | Formula            |
|----------|------------|------|------|------|--------|------|----------|--------------------|
| 364.1080 | 364.1096   | -1.6 | -4.4 | 10.5 | 1124.1 | n/a  | n/a      | C18 H19 N3 O2 S Na |



Single Mass Analysis

Tolerance = 50.0 PPM / DBE: min = -1.5, max = 50.0

Element prediction: Off

Number of isotope peaks used for i-FIT = 3

Monoisotopic Mass, Even Electron Ions

17 formula(e) evaluated with 1 results within limits (up to 3 closest results for each mass)

Elements Used:

C: 0-14 H: 0-100 N: 0-2 Br: 0-2

SM-384

QMI DIVISION, CSIR-IIIM JAMMU  
Xevo G2-XS QTOF YFC2015

23-Apr-2024

13:02:49

230424\_21 7 (0.155)

1: TOF MS ES+

3.41e+007

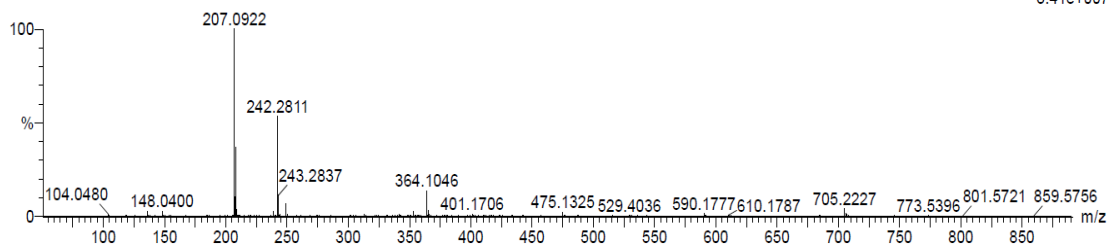

Minimum: -1.5  
Maximum: 2.0 50.0 50.0

| Mass     | Calc. Mass | mDa | PPM | DBE  | i-FIT  | Norm | Conf(%) | Formula    |
|----------|------------|-----|-----|------|--------|------|---------|------------|
| 207.0922 | 207.0922   | 0.0 | 0.0 | 10.5 | 1352.3 | n/a  | n/a     | C14 H11 N2 |

**<sup>1</sup>H NMR (400 MHz, CDCl<sub>3</sub>) of 3o**

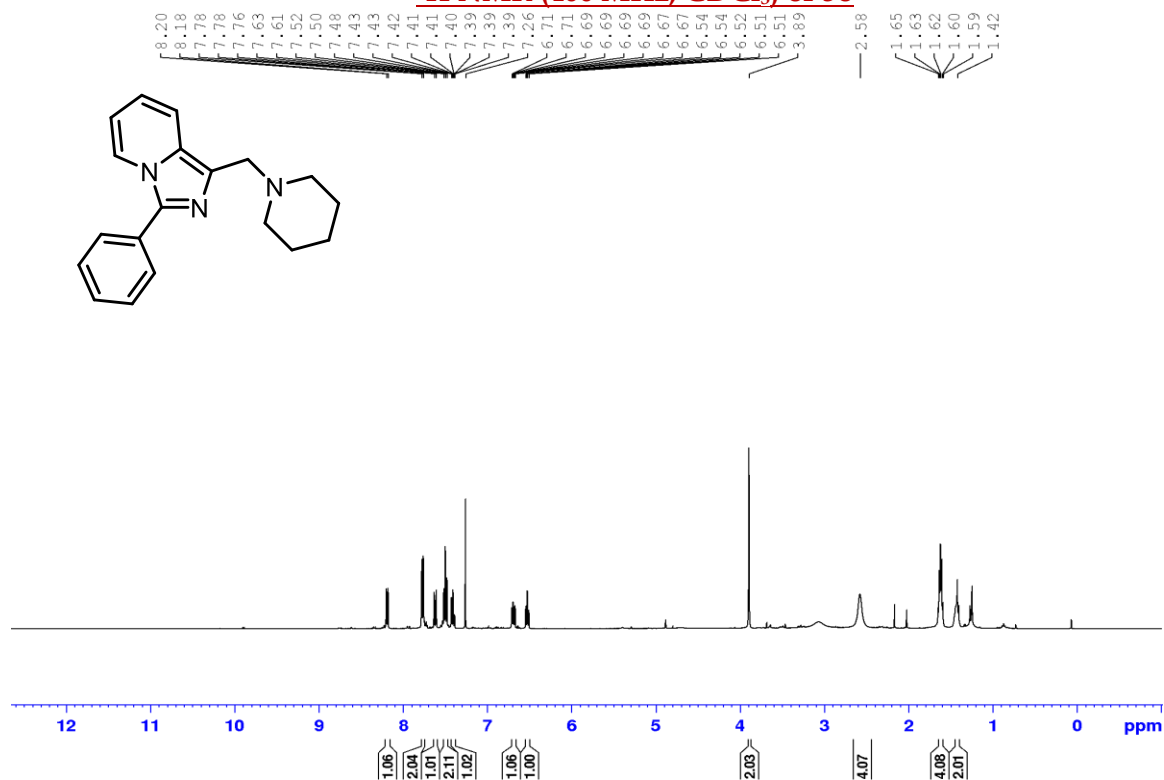

**$^{13}\text{C}\{^1\text{H}\}$  NMR (101 MHz,  $\text{CDCl}_3$ ) of 3o**

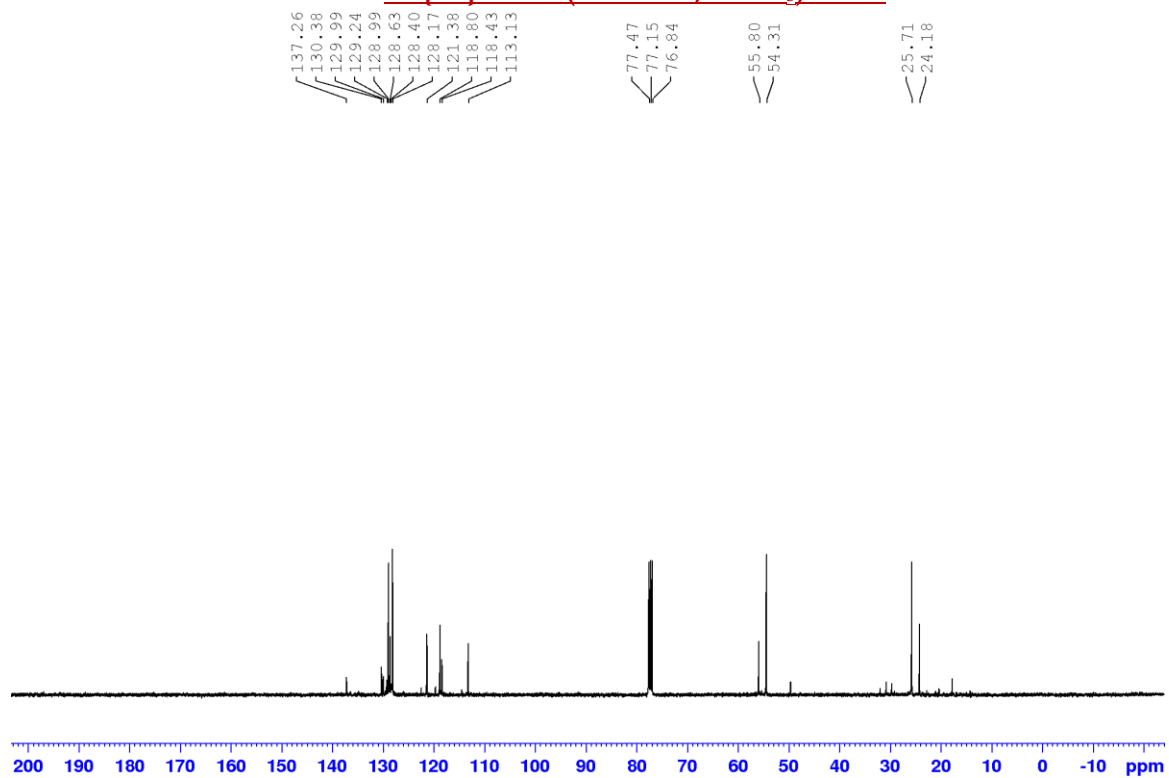

**DEPT-135 (400 MHz,  $\text{CDCl}_3$ ) of 3o**

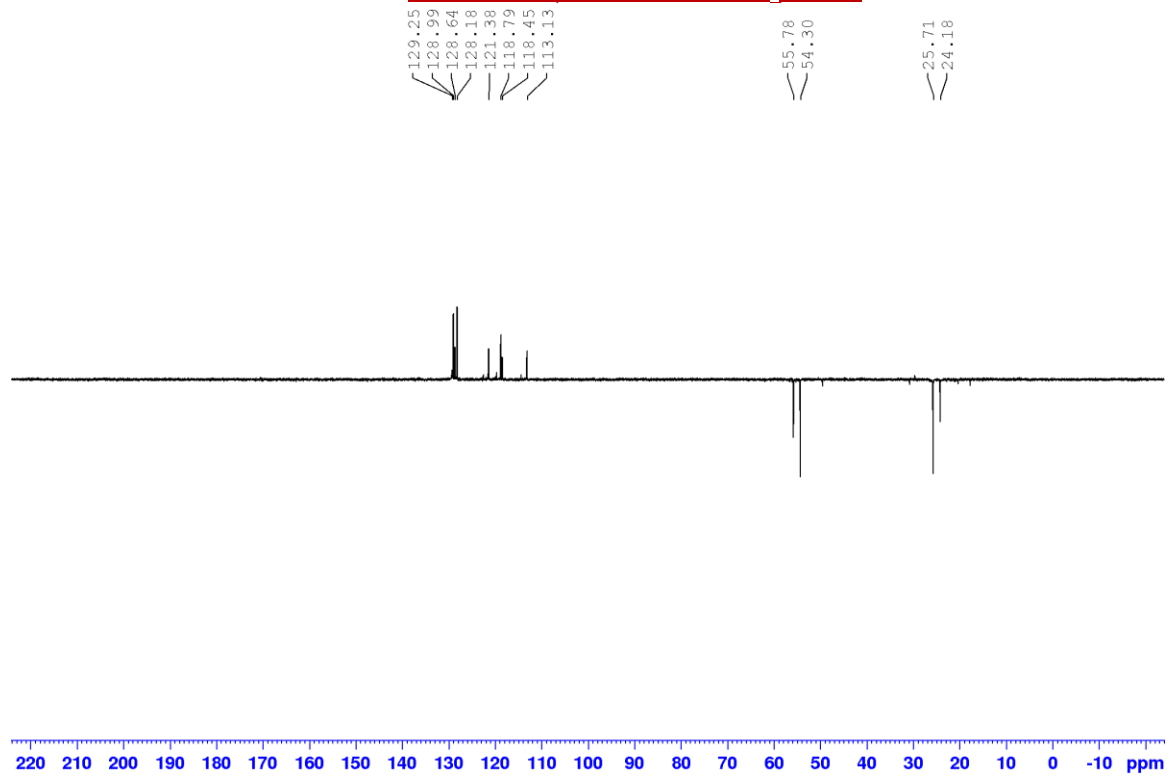

## HRMS of 3o

### Elemental Composition Report

Page 1

#### Single Mass Analysis

Tolerance = 50.0 PPM / DBE: min = -1.5, max = 50.0

Element prediction: Off

Number of isotope peaks used for i-FIT = 3

Monoisotopic Mass, Even Electron Ions

7 formula(e) evaluated with 1 results within limits (up to 3 closest results for each mass)

Elements Used:

C: 0-19 H: 0-100 N: 0-3

SM-430

QMI DIVISION, CSIR-IIIM JAMMU  
Xevo G2-XS QTOF YFC2015

07-May-2024

15:21:30

1: TOF MS ES+

1.04e+007

070524\_55 5 (0.121)

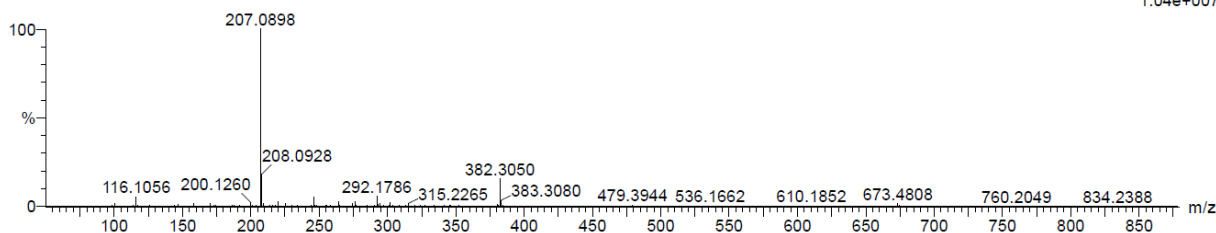

Minimum: -1.5  
Maximum: 2.0 50.0 50.0

| Mass     | Calc. Mass | mDa  | PPM  | DBE  | i-FIT | Norm | Conf (%) | Formula    |
|----------|------------|------|------|------|-------|------|----------|------------|
| 292.1786 | 292.1814   | -2.8 | -9.6 | 10.5 | 916.5 | n/a  | n/a      | C19 H22 N3 |

### Elemental Composition Report

Page 1

#### Single Mass Analysis

Tolerance = 50.0 PPM / DBE: min = -1.5, max = 50.0

Element prediction: Off

Number of isotope peaks used for i-FIT = 3

Monoisotopic Mass, Even Electron Ions

6 formula(e) evaluated with 1 results within limits (up to 3 closest results for each mass)

Elements Used:

C: 0-14 H: 0-100 N: 0-2

SM-430

QMI DIVISION, CSIR-IIIM JAMMU  
Xevo G2-XS QTOF YFC2015

07-May-2024

13:54:45

1: TOF MS ES+

1.99e+007

070524\_26 6 (0.138)

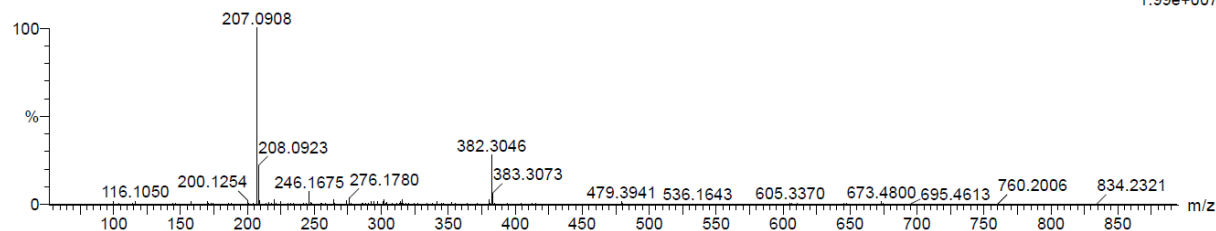

Minimum: -1.5  
Maximum: 2.0 50.0 50.0

| Mass     | Calc. Mass | mDa  | PPM  | DBE  | i-FIT  | Norm | Conf (%) | Formula    |
|----------|------------|------|------|------|--------|------|----------|------------|
| 207.0908 | 207.0922   | -1.4 | -6.8 | 10.5 | 1342.7 | n/a  | n/a      | C14 H11 N2 |

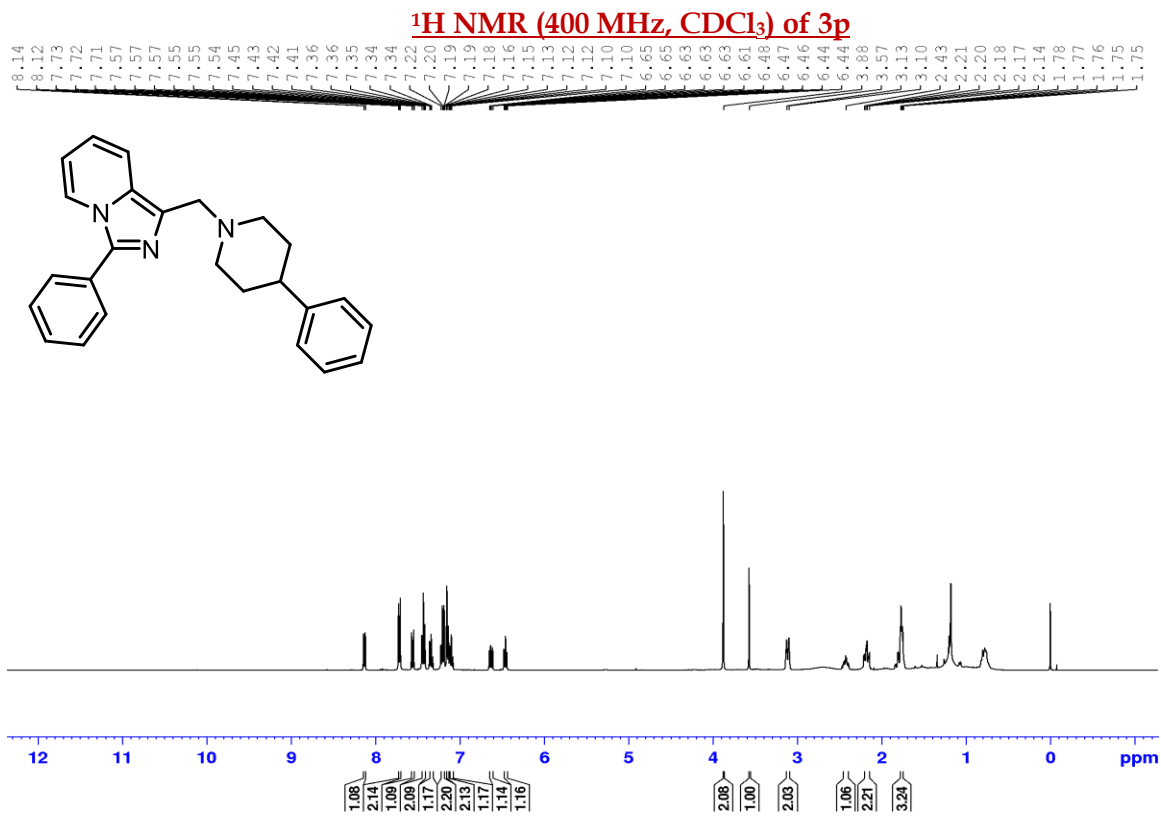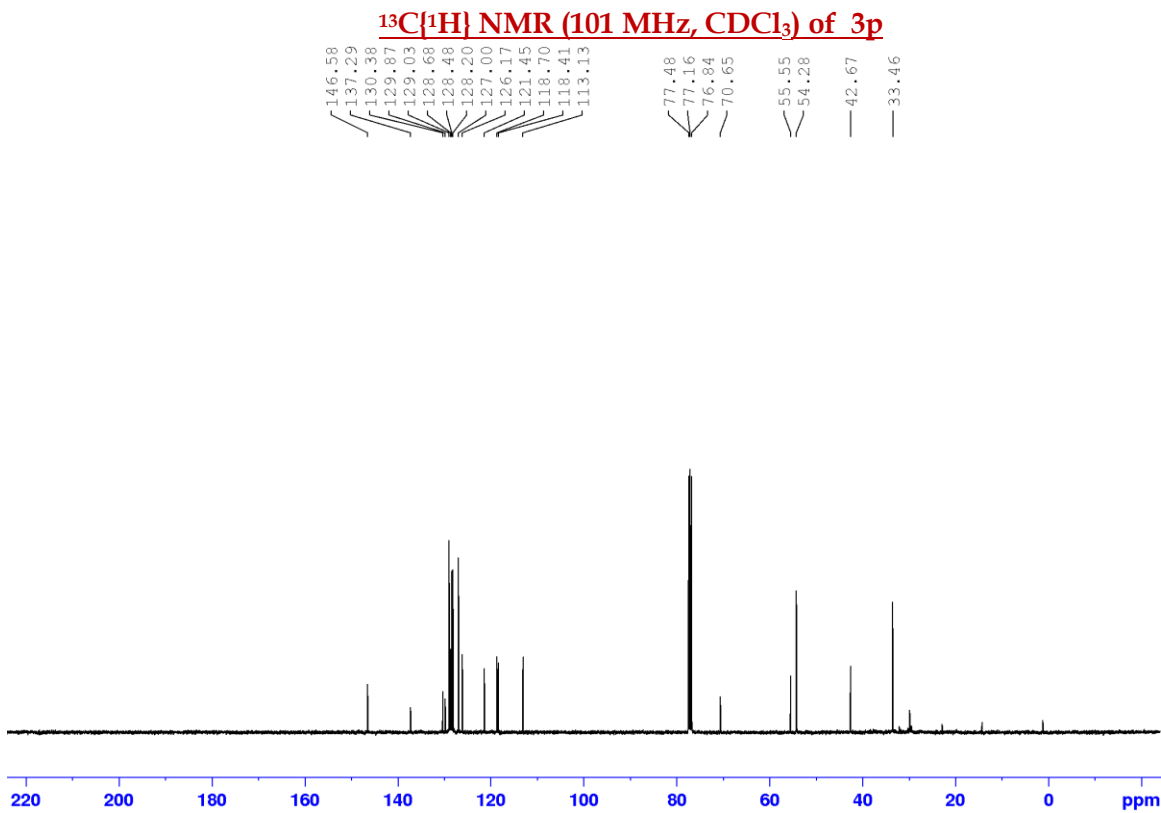

**DEPT-135 (400 MHz, CDCl<sub>3</sub>) of 3p**

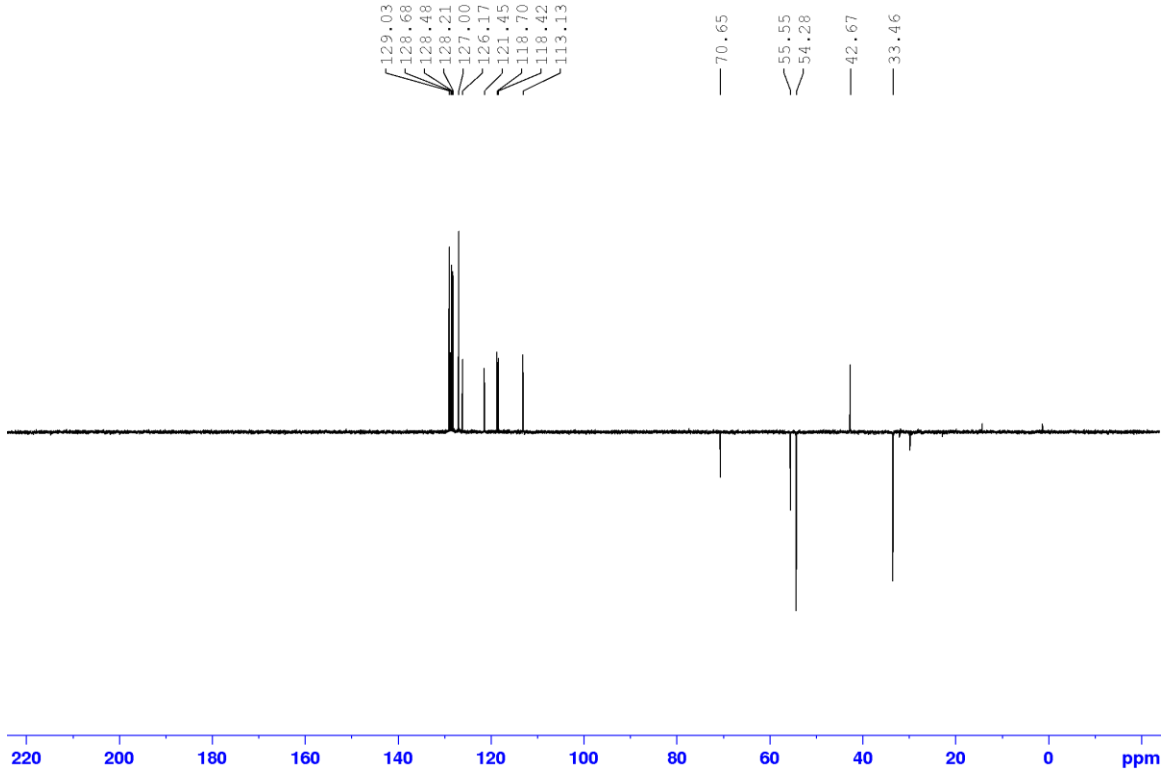

**HRMS of 3p**

**Elemental Composition Report**

**Single Mass Analysis**

Tolerance = 50.0 PPM / DBE: min = -1.5, max = 50.0  
 Element prediction: Off  
 Number of isotope peaks used for i-FIT = 3

Monoisotopic Mass, Even Electron Ions

7 formula(e) evaluated with 1 results within limits (up to 3 closest results for each mass)

Elements Used:

C: 0-25 H: 0-100 N: 0-3

SM-341

QMI DIVISION, CSIR-IIIM JAMMU  
 Xevo G2-XS QTOF YFC2015

23-Apr-2024

12:20:20

1: TOF MS ES+

1.47e+007

230424\_05 5 (0.121)

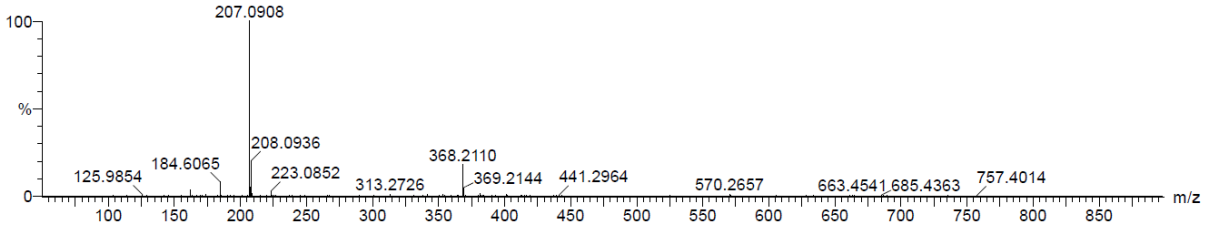

Minimum: -1.5  
 Maximum: 50.0

| Mass     | Calc. Mass | mDa  | PPM  | DBE  | i-FIT  | Norm | Conf(%) | Formula                                        |
|----------|------------|------|------|------|--------|------|---------|------------------------------------------------|
| 368.2110 | 368.2127   | -1.7 | -4.6 | 14.5 | 1152.7 | n/a  | n/a     | C <sub>25</sub> H <sub>26</sub> N <sub>3</sub> |

## Elemental Composition Report

Page 1

### Single Mass Analysis

Tolerance = 50.0 PPM / DBE: min = -1.5, max = 50.0

Element prediction: Off

Number of isotope peaks used for i-FIT = 3

Monoisotopic Mass, Even Electron Ions

6 formula(e) evaluated with 1 results within limits (up to 3 closest results for each mass)

Elements Used:

C: 0-14 H: 0-100 N: 0-2

SM-341

QMI DIVISION, CSIR-IIIM JAMMU  
Xevo G2-XS QTOF YFC2015

23-Apr-2024

12:20:20

1: TOF MS ES+

2.27e+007

230424\_05 6 (0.138)

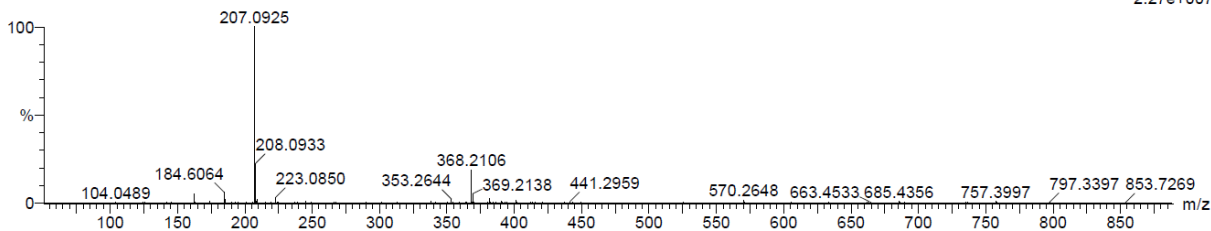

Minimum: -1.5  
Maximum: 2.0 50.0 50.0

| Mass     | Calc. Mass | mDa | PPM | DBE  | i-FIT  | Norm | Conf (%) | Formula    |
|----------|------------|-----|-----|------|--------|------|----------|------------|
| 207.0925 | 207.0922   | 0.3 | 1.4 | 10.5 | 1532.3 | n/a  | n/a      | C14 H11 N2 |

### <sup>1</sup>H NMR (400 MHz, CDCl<sub>3</sub>) of 3q

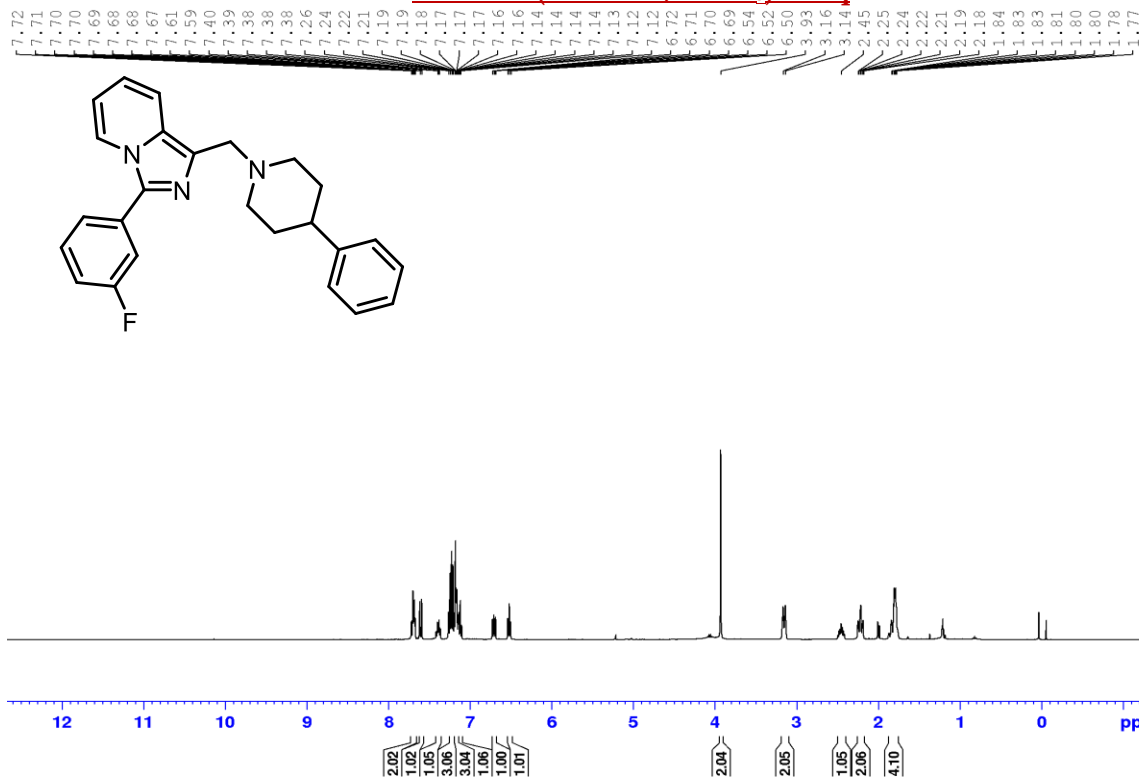

**$^{13}\text{C}\{^1\text{H}\}$  NMR (101 MHz,  $\text{CDCl}_3$ ) of 3q**

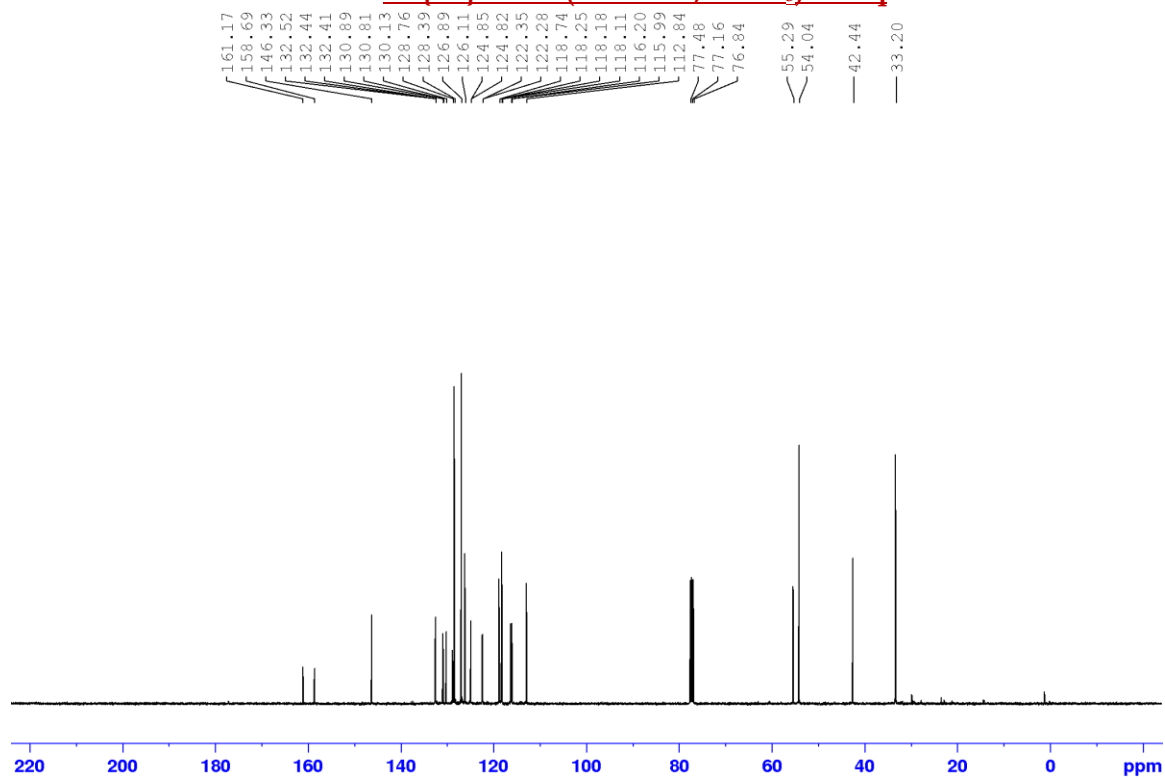

**DEPT-135 (400 MHz,  $\text{CDCl}_3$ ) of 3q**

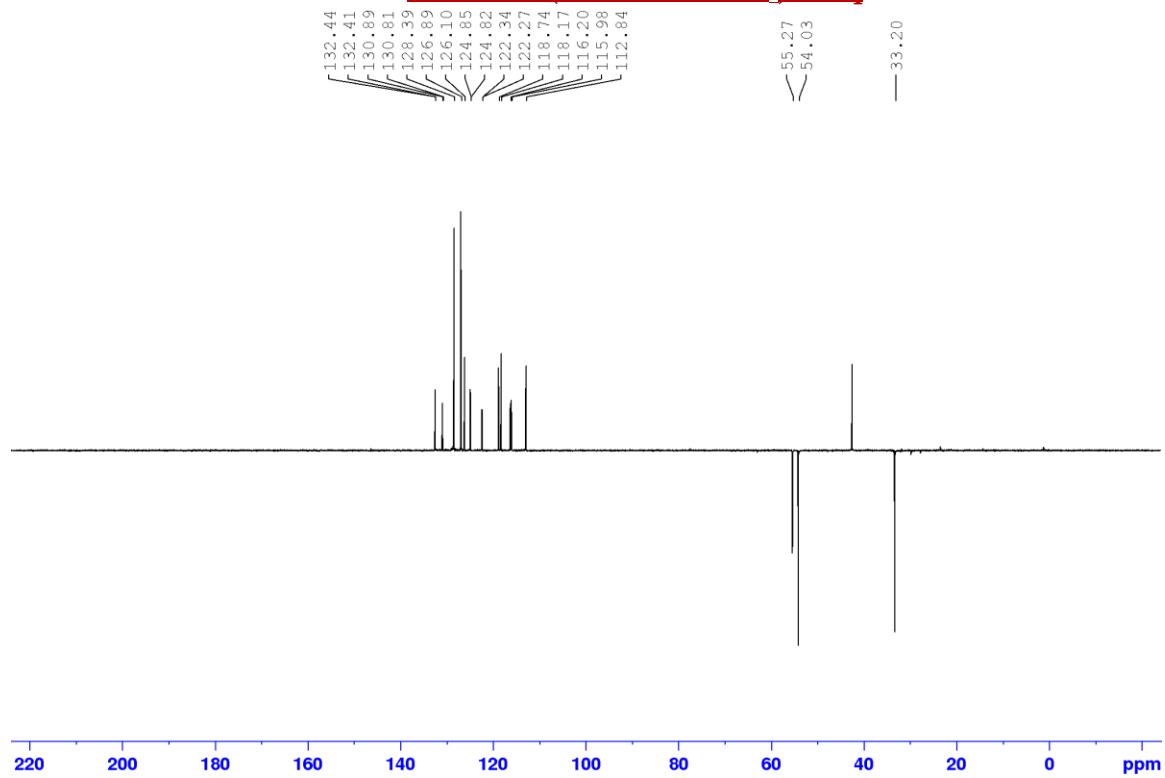

**<sup>19</sup>F NMR (377 MHz, CDCl<sub>3</sub>) of 3q**

-110.91  
-110.92  
-110.94  
-110.95

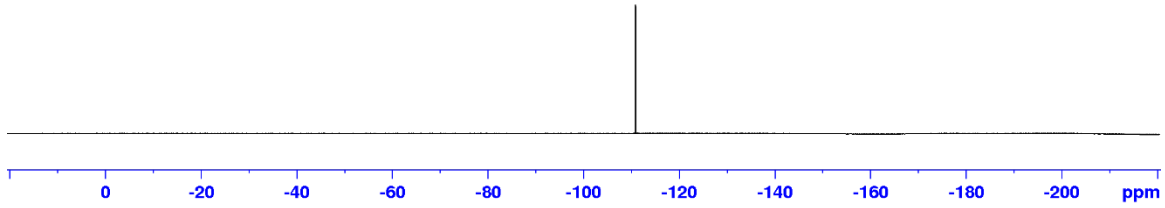

**HRMS of 3q**

**Elemental Composition Report**

Page 1

**Single Mass Analysis**

Tolerance = 50.0 PPM / DBE: min = -1.5, max = 50.0

Element prediction: Off

Number of isotope peaks used for i-FIT = 3

Monoisotopic Mass, Even Electron Ions

19 formula(e) evaluated with 1 results within limits (up to 3 closest results for each mass)

Elements Used:

C: 0-25 H: 0-100 N: 0-4 F: 0-1

SM-389

QMI DIVISION, CSIR-IIIM JAMMU  
Xevo G2-XS QTOF YFC2015

23-Apr-2024

12:54:49

1: TOF MS ES+

6.01e+006

230424\_18.4 (0.104)

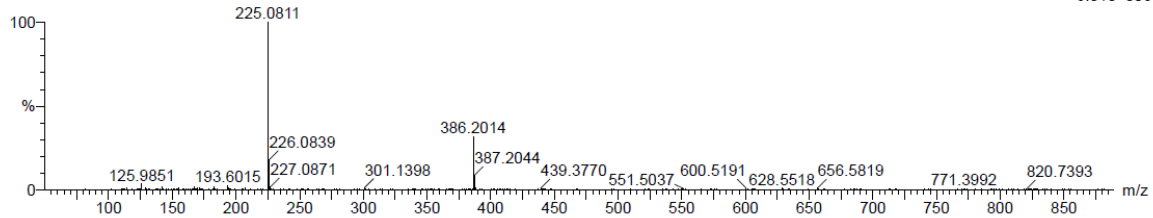

Minimum: -1.5  
Maximum: 2.0 50.0 50.0

| Mass     | Calc. Mass | mDa  | PPM  | DBE  | i-FIT  | Norm | Conf(%) | Formula      |
|----------|------------|------|------|------|--------|------|---------|--------------|
| 386.2014 | 386.2033   | -1.9 | -4.9 | 14.5 | 1005.5 | n/a  | n/a     | C25 H25 N3 F |



Single Mass Analysis

Tolerance = 50.0 PPM / DBE: min = -1.5, max = 50.0

Element prediction: Off

Number of isotope peaks used for i-FIT = 3

Monoisotopic Mass, Even Electron Ions

9 formula(e) evaluated with 1 results within limits (up to 3 closest results for each mass)

Elements Used:

C: 0-14 H: 0-100 N: 0-2 F: 0-1

SM-389

QMI DIVISION, CSIR-IIIM JAMMU  
Xevo G2-XS QTOF YFC2015

23-Apr-2024

12:54:49

1: TOF MS ES+

3.19e+007

230424\_187 (0.155)

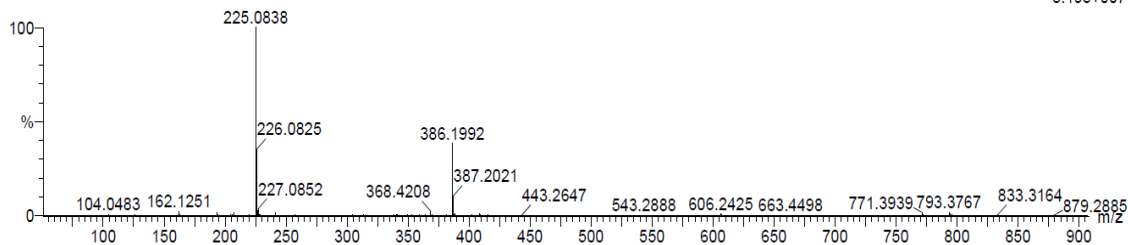

Minimum: -1.5  
Maximum: 2.0 50.0 50.0

| Mass     | Calc. Mass | mDa | PPM | DBE  | i-FIT  | Norm | Conf (%) | Formula      |
|----------|------------|-----|-----|------|--------|------|----------|--------------|
| 225.0838 | 225.0828   | 1.0 | 4.4 | 10.5 | 1350.8 | n/a  | n/a      | C14 H10 N2 F |

**<sup>1</sup>H NMR (400 MHz, CDCl<sub>3</sub>) of 3r**

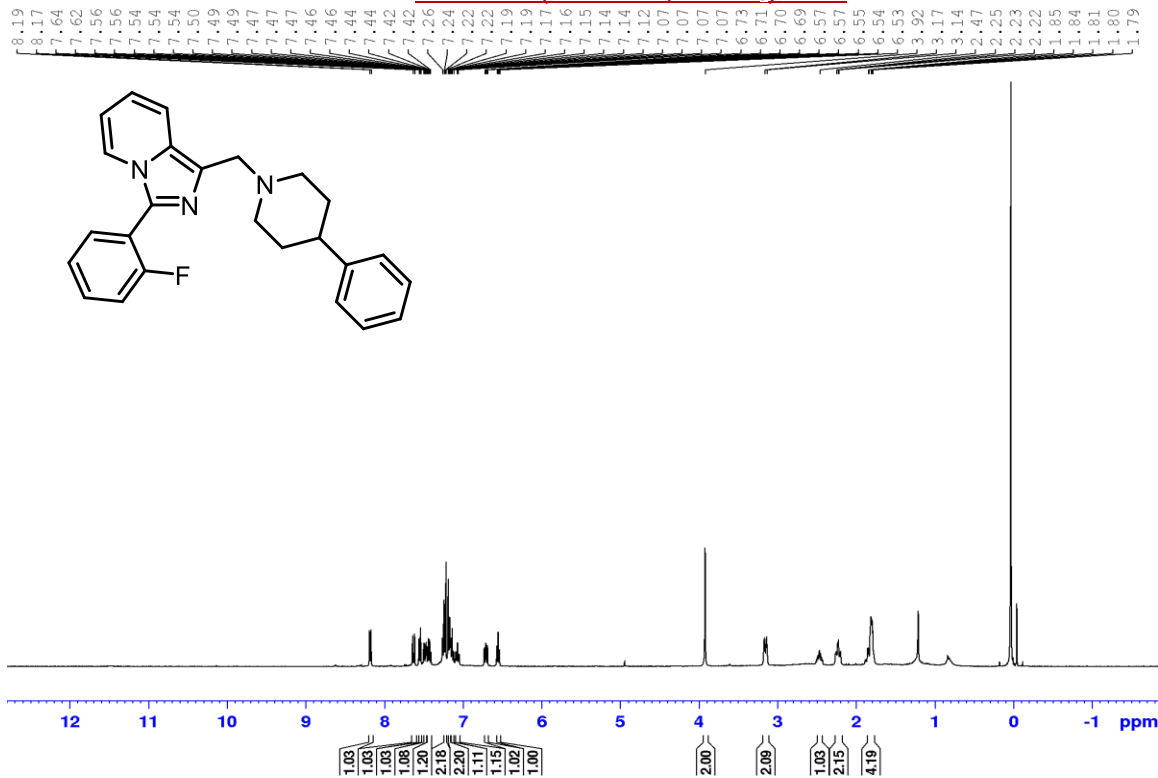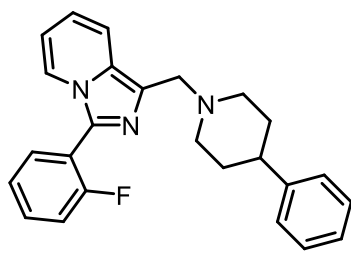

**<sup>13</sup>C{<sup>1</sup>H} NMR (101 MHz, CDCl<sub>3</sub>) of 3r**

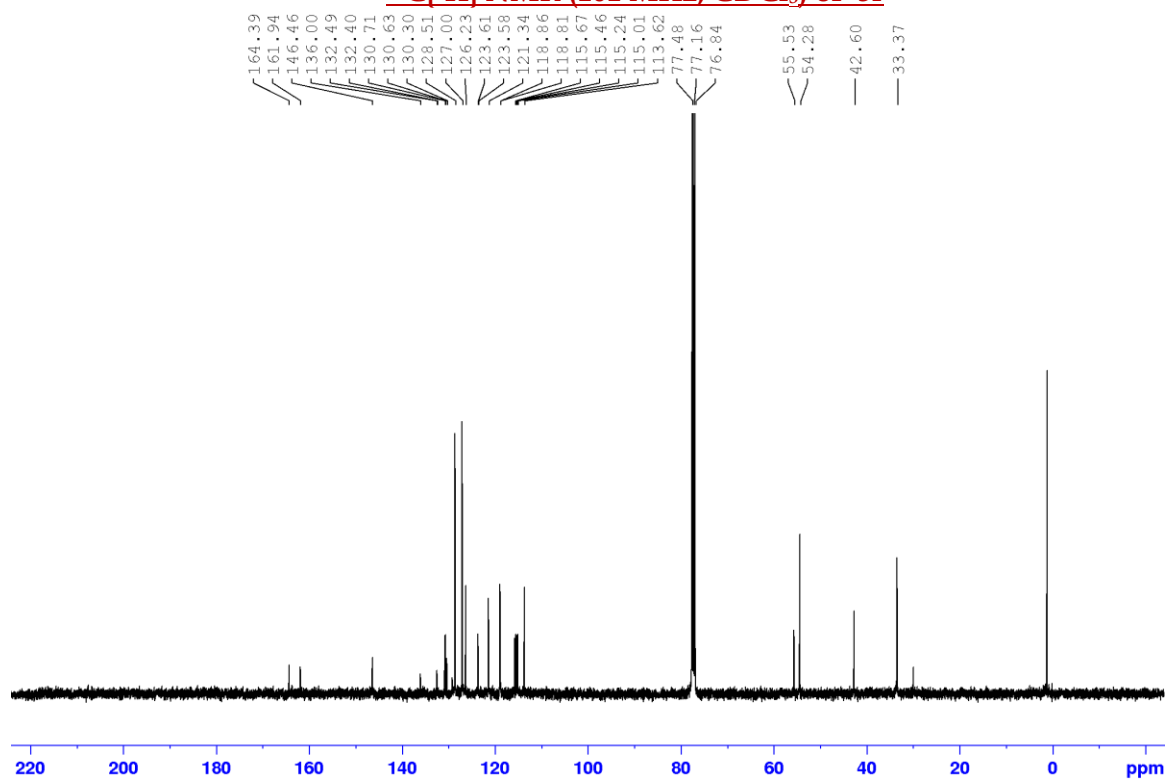

**DEPT-135 (400 MHz, CDCl<sub>3</sub>) of 3r**

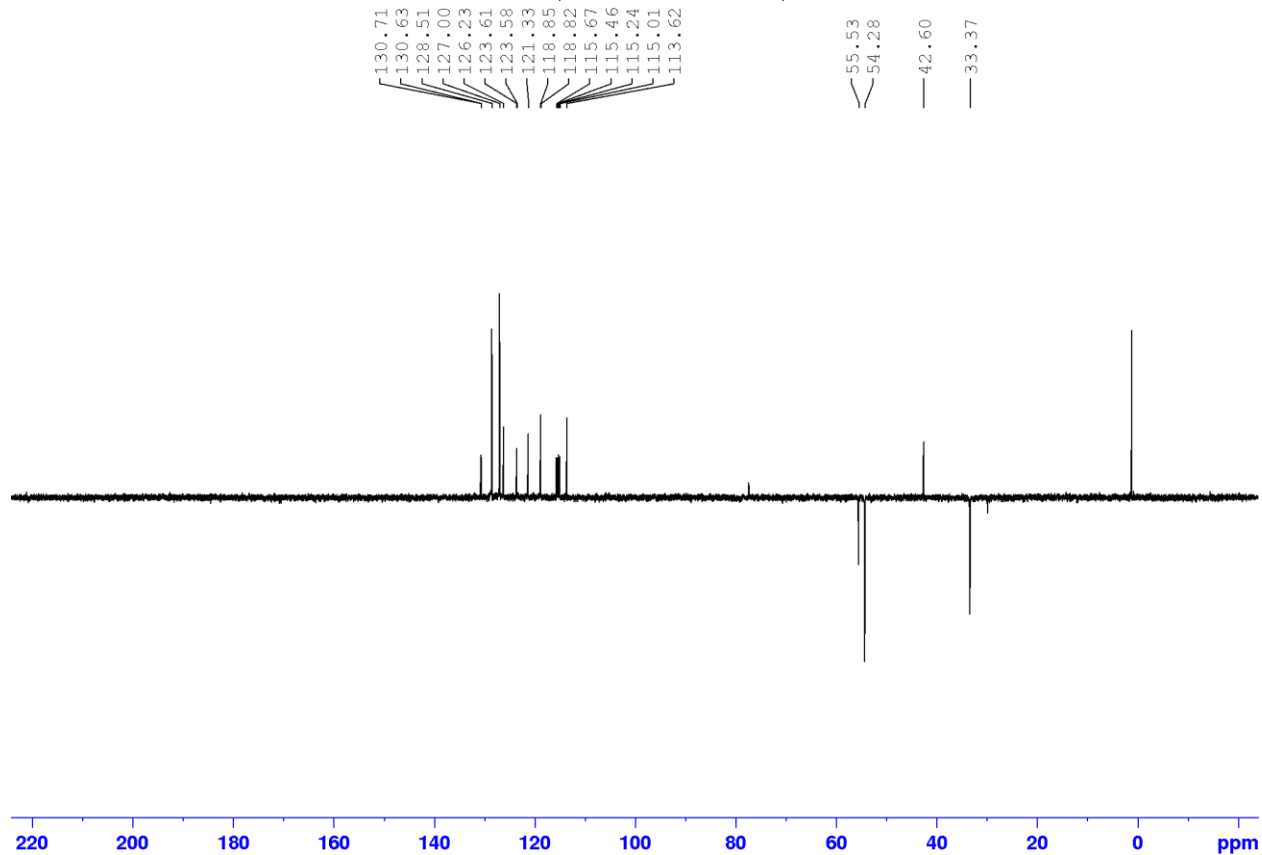

**<sup>19</sup>F NMR (377 MHz, CDCl<sub>3</sub>) of 3r**

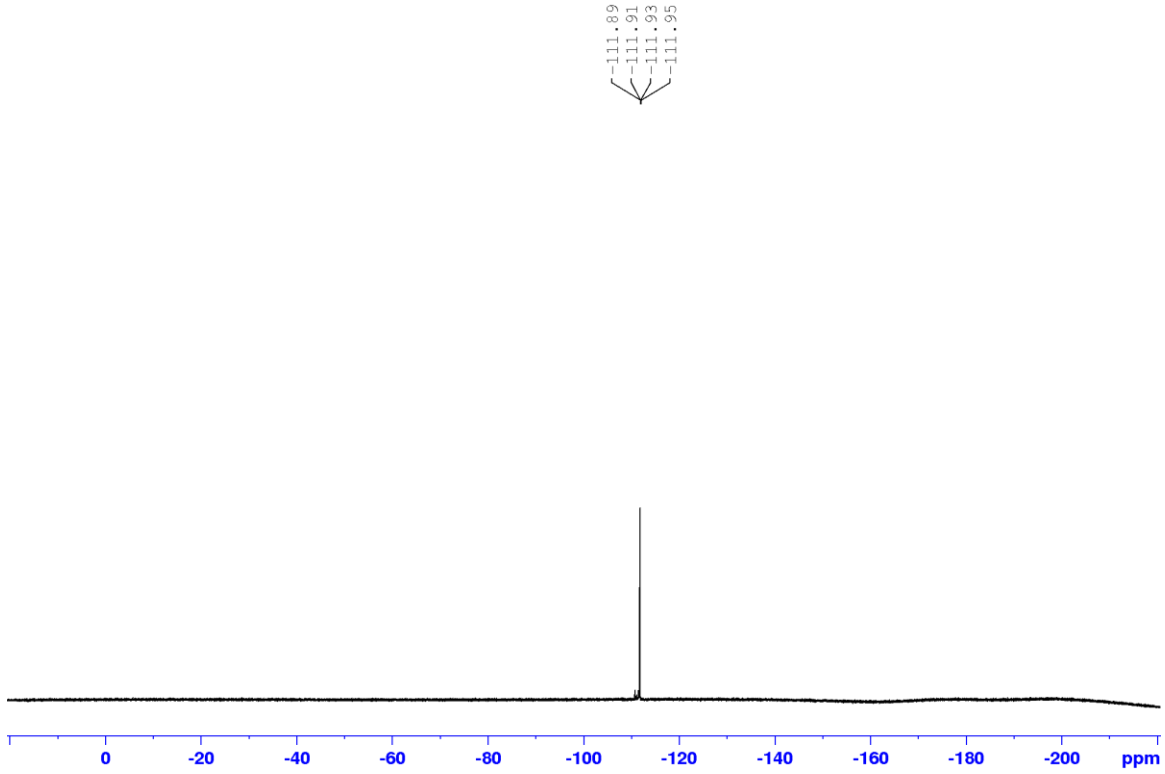

**HRMS of 3r**

**Elemental Composition Report**

**Single Mass Analysis**

Tolerance = 50.0 PPM / DBE: min = -1.5, max = 50.0

Element prediction: Off

Number of isotope peaks used for i-FIT = 3

Monoisotopic Mass, Even Electron Ions

12 formula(e) evaluated with 1 results within limits (up to 3 closest results for each mass)

Elements Used:

C: 0-25 H: 0-100 N: 0-3 F: 0-1

SM-390

QMI DIVISION, CSIR-IIIM JAMMU  
Xevo G2-XS QTOF YFC2015

23-Apr-2024

12:41:11

1: TOF MS ES+

2.52e+007

230424\_13 5 (0.121)

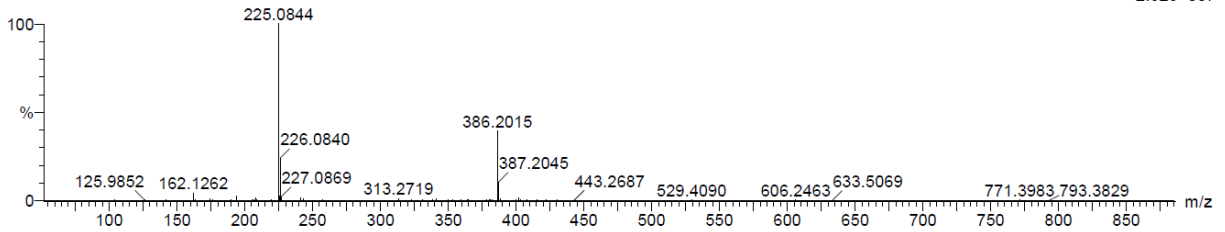

Minimum: -1.5  
Maximum: 2.0 50.0 50.0

| Mass     | Calc. Mass | mDa  | PPM  | DBE  | i-FIT  | Norm | Conf (%) | Formula      |
|----------|------------|------|------|------|--------|------|----------|--------------|
| 386.2015 | 386.2033   | -1.8 | -4.7 | 14.5 | 1088.1 | n/a  | n/a      | C25 H25 N3 F |

## Single Mass Analysis

Tolerance = 50.0 PPM / DBE: min = -1.5, max = 50.0

Element prediction: Off

Number of isotope peaks used for i-FIT = 3

Monoisotopic Mass, Even Electron Ions

9 formula(e) evaluated with 1 results within limits (up to 3 closest results for each mass)

Elements Used:

C: 0-14 H: 0-100 N: 0-2 F: 0-1

SM-390

QMI DIVISION, CSIR-IIIM JAMMU  
Xevo G2-XS QTOF YFC2015

23-Apr-2024

12:41:11

1: TOF MS ES+

2.33e+007

230424\_13 7 (0.155)

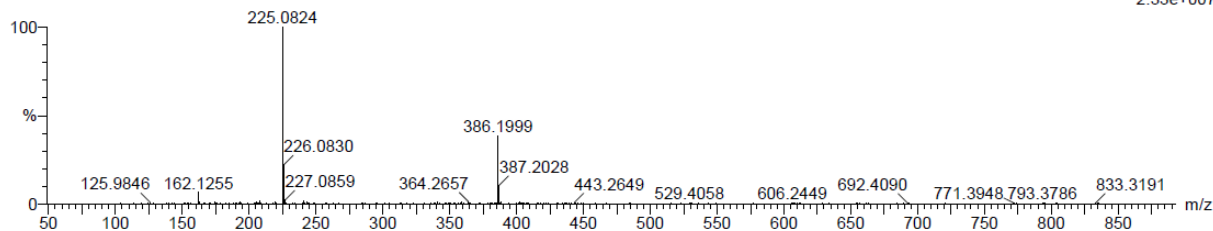

Minimum: -1.5  
Maximum: 2.0 50.0 50.0

| Mass     | Calc. Mass | mDa  | PPM  | DBE  | i-FIT  | Norm | Conf(%) | Formula      |
|----------|------------|------|------|------|--------|------|---------|--------------|
| 225.0824 | 225.0828   | -0.4 | -1.8 | 10.5 | 1408.5 | n/a  | n/a     | C14 H10 N2 F |

**<sup>1</sup>H NMR (400 MHz, CDCl<sub>3</sub>) of 3s**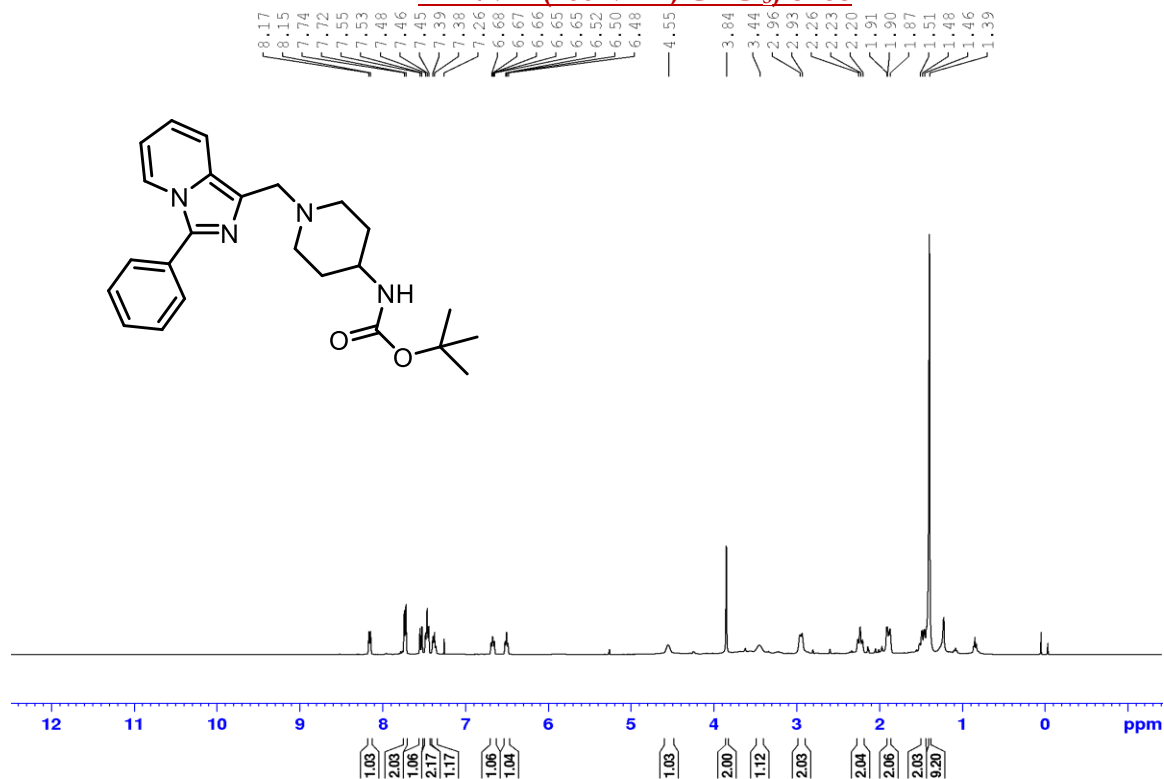

**$^{13}\text{C}\{^1\text{H}\}$  NMR (101 MHz,  $\text{CDCl}_3$ ) of 3s**

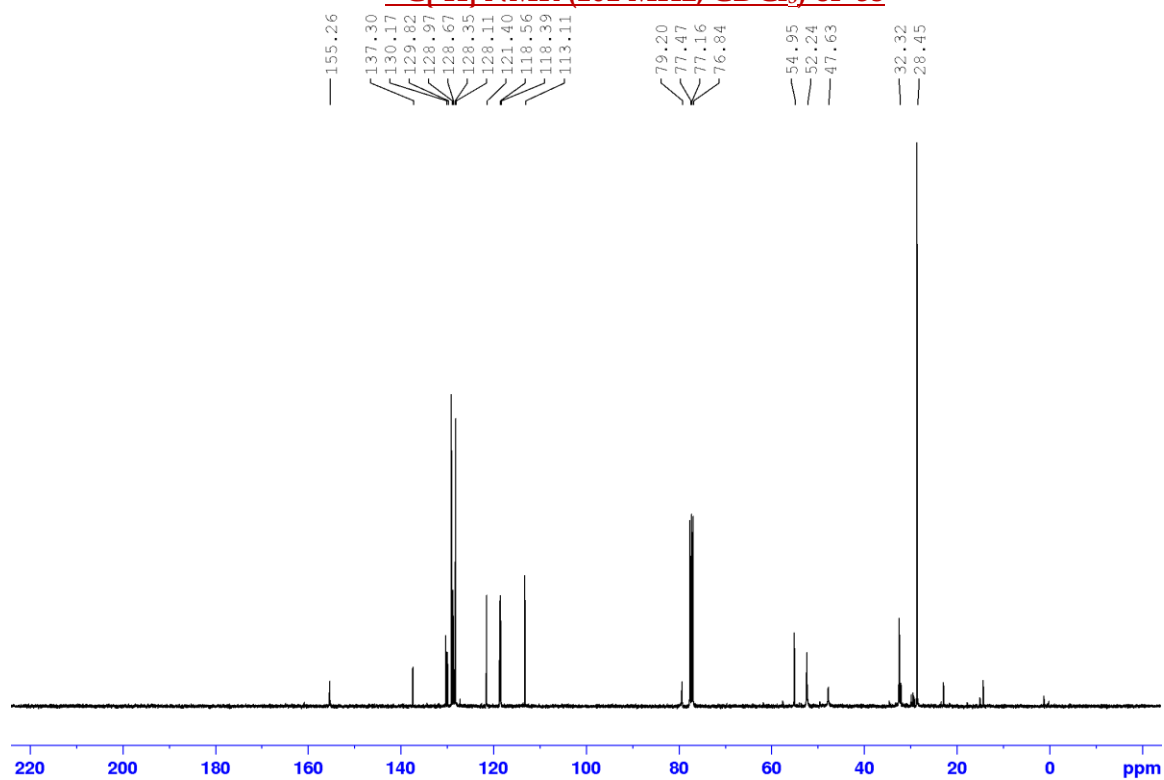

**DEPT-135 (400 MHz,  $\text{CDCl}_3$ ) of 3s**

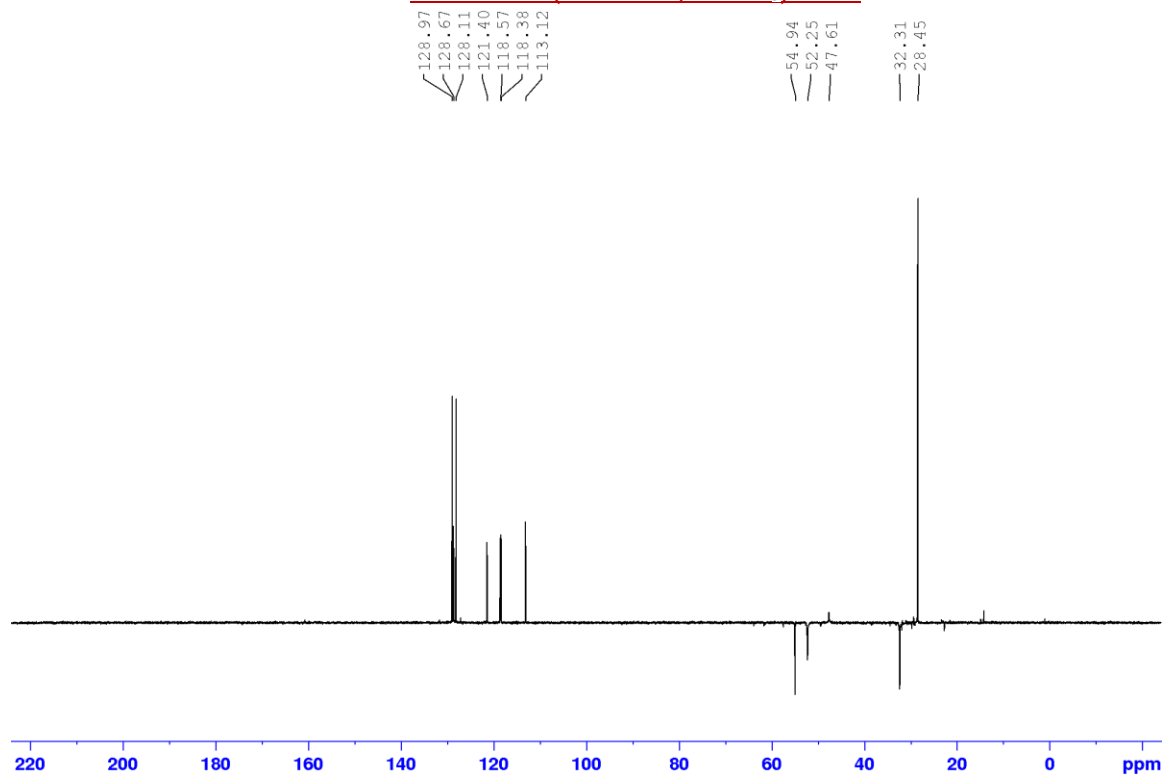

# HRMS of 3s

## Elemental Composition Report

Page 1

### Single Mass Analysis

Tolerance = 50.0 PPM / DBE: min = -1.5, max = 50.0

Element prediction: Off

Number of isotope peaks used for i-FIT = 3

Monoisotopic Mass, Even Electron Ions

19 formula(e) evaluated with 1 results within limits (up to 3 closest results for each mass)

Elements Used:

C: 0-24 H: 0-100 N: 0-4 O: 0-2

SM-376

QMI DIVISION, CSIR-IIIM JAMMU  
Xevo G2-XS QTOF YFC2015

23-Apr-2024

12:15:12

1: TOF MS ES+

3.19e+007

230424\_03 5 (0.121)

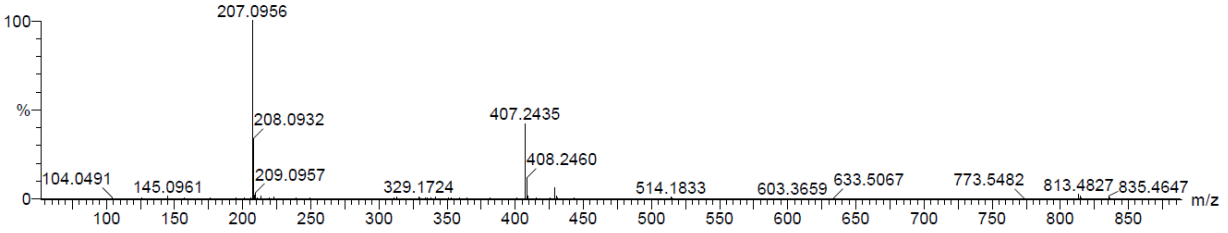

Minimum: -1.5  
Maximum: 2.0 50.0 50.0

| Mass     | Calc. Mass | mDa  | PPM  | DBE  | i-FIT  | Norm | Conf(%) | Formula       |
|----------|------------|------|------|------|--------|------|---------|---------------|
| 407.2435 | 407.2447   | -1.2 | -2.9 | 11.5 | 1078.5 | n/a  | n/a     | C24 H31 N4 O2 |

## Elemental Composition Report

Page 1

### Single Mass Analysis

Tolerance = 50.0 PPM / DBE: min = -1.5, max = 50.0

Element prediction: Off

Number of isotope peaks used for i-FIT = 3

Monoisotopic Mass, Even Electron Ions

6 formula(e) evaluated with 1 results within limits (up to 3 closest results for each mass)

Elements Used:

C: 0-14 H: 0-100 N: 0-2

SM-376

QMI DIVISION, CSIR-IIIM JAMMU  
Xevo G2-XS QTOF YFC2015

23-Apr-2024

12:15:12

1: TOF MS ES+

3.62e+007

230424\_03 7 (0.155)

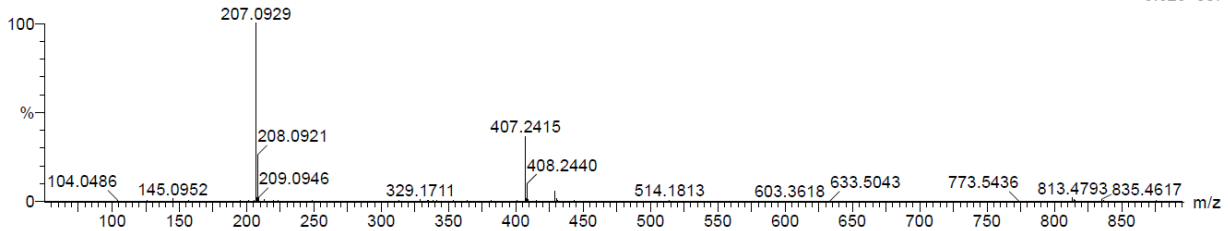

Minimum: -1.5  
Maximum: 2.0 50.0 50.0

| Mass     | Calc. Mass | mDa | PPM | DBE  | i-FIT  | Norm | Conf(%) | Formula    |
|----------|------------|-----|-----|------|--------|------|---------|------------|
| 207.0929 | 207.0922   | 0.7 | 3.4 | 10.5 | 1510.8 | n/a  | n/a     | C14 H11 N2 |

**<sup>1</sup>H NMR (400 MHz, CDCl<sub>3</sub>) of 3t**

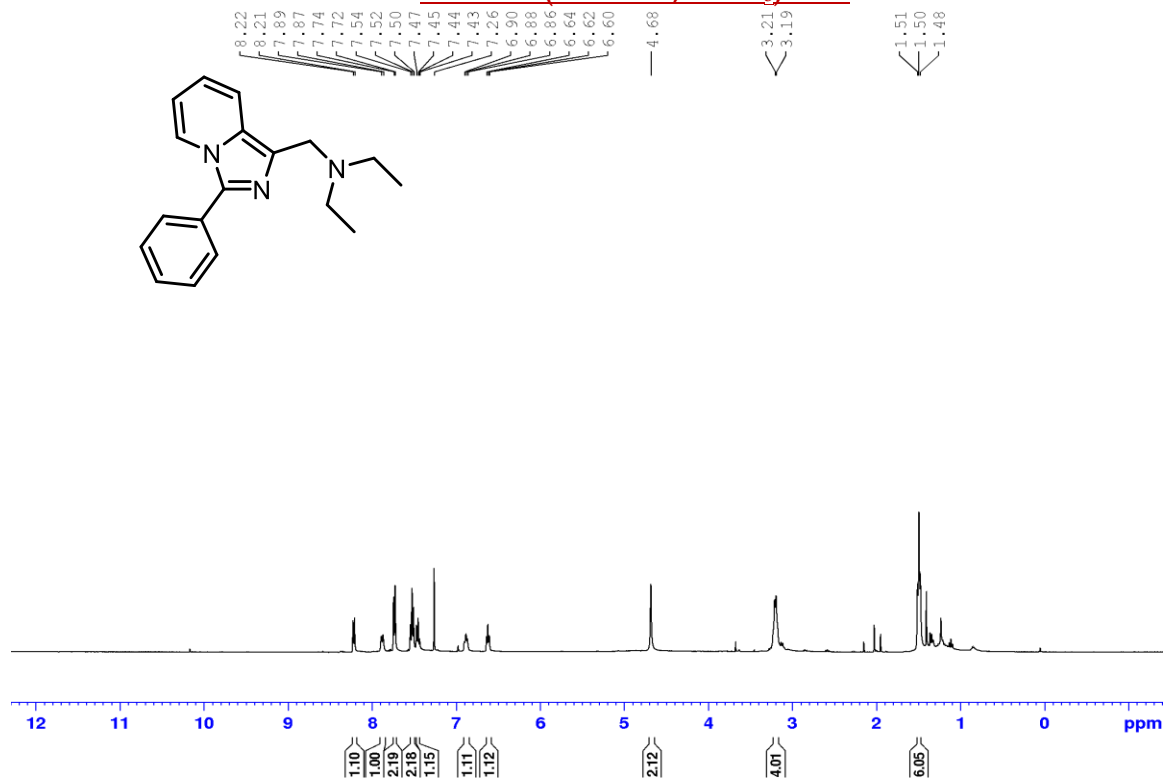

**<sup>13</sup>C[<sup>1</sup>H] NMR (101 MHz, CDCl<sub>3</sub>) of 3t**

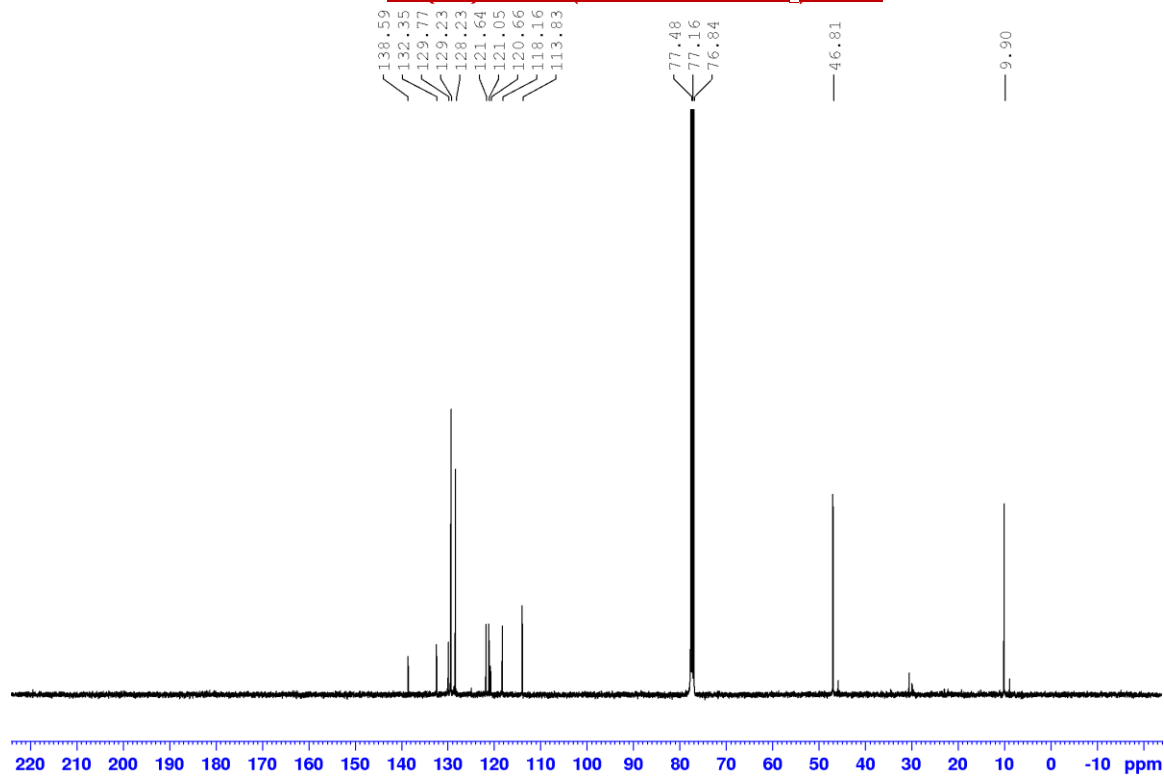

### DEPT-135 (400 MHz, CDCl<sub>3</sub>) of 3t

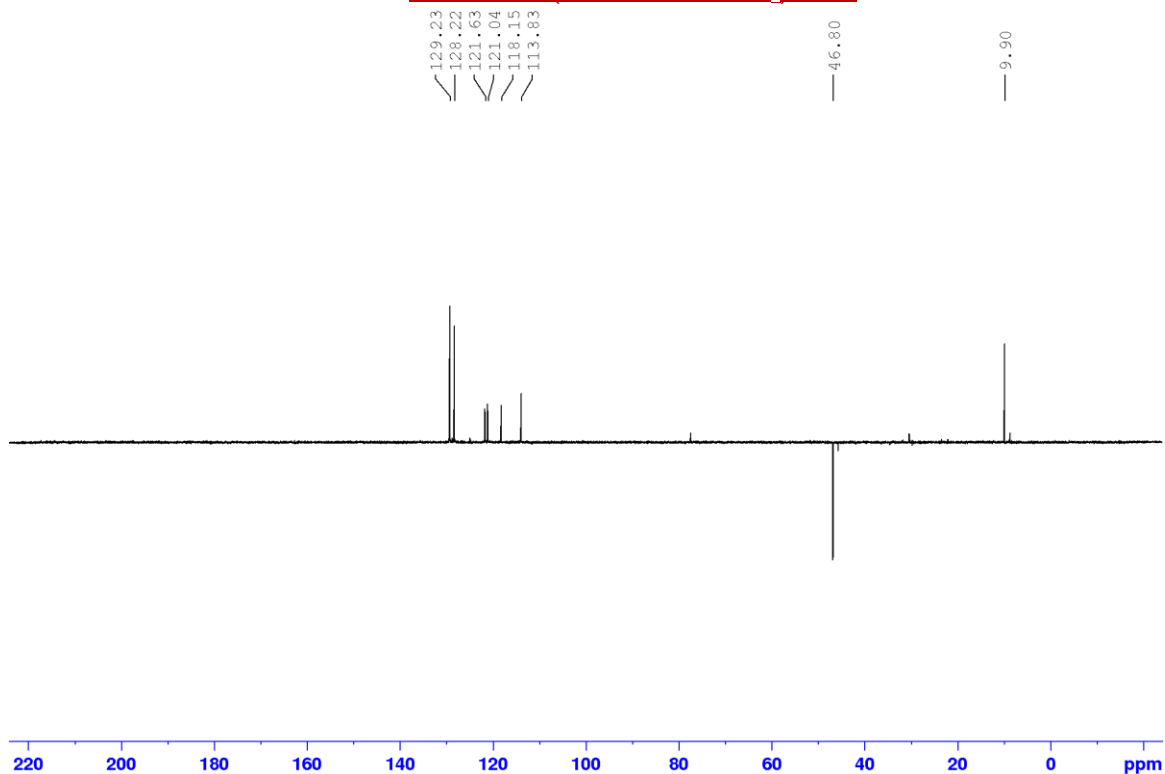

### HRMS of 3t

#### Elemental Composition Report

Page 1

#### Single Mass Analysis

Tolerance = 50.0 PPM / DBE: min = -1.5, max = 50.0

Element prediction: Off

Number of isotope peaks used for i-FIT = 3

Monoisotopic Mass, Even Electron Ions

9 formula(e) evaluated with 1 results within limits (up to 3 closest results for each mass)

Elements Used:

C: 0-14 H: 0-100 N: 0-3

SM-486

QMI DIVISION, CSIR-IIIM JAMMU  
Xevo G2-XS QTOF YFC2015

07-May-2024

14:05:00

070524\_30 5 (0.121)

1: TOF MS ES+

2.00e+007

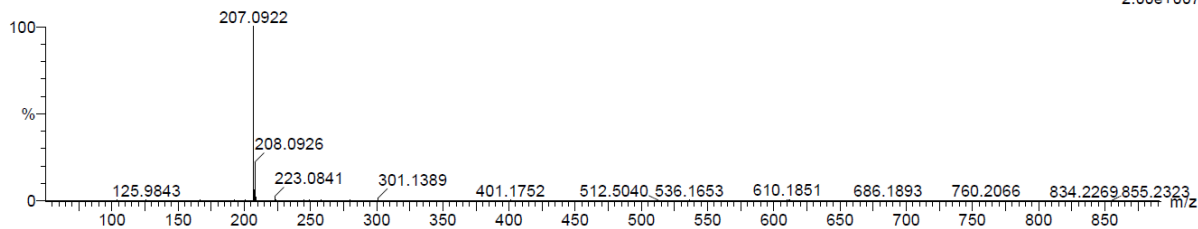

Minimum: -1.5  
Maximum: 2.0 50.0 50.0

| Mass     | Calc. Mass | mDa | PPM | DBE  | i-FIT  | Norm | Conf(%) | Formula    |
|----------|------------|-----|-----|------|--------|------|---------|------------|
| 207.0922 | 207.0922   | 0.0 | 0.0 | 10.5 | 1350.9 | n/a  | n/a     | C14 H11 N2 |



**<sup>1</sup>H NMR (400 MHz, CDCl<sub>3</sub>) of 3u**

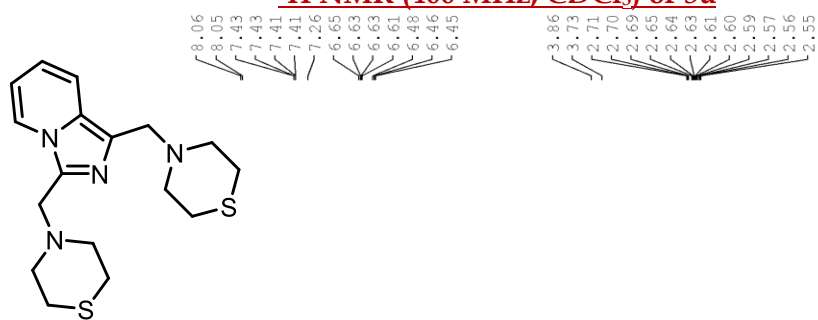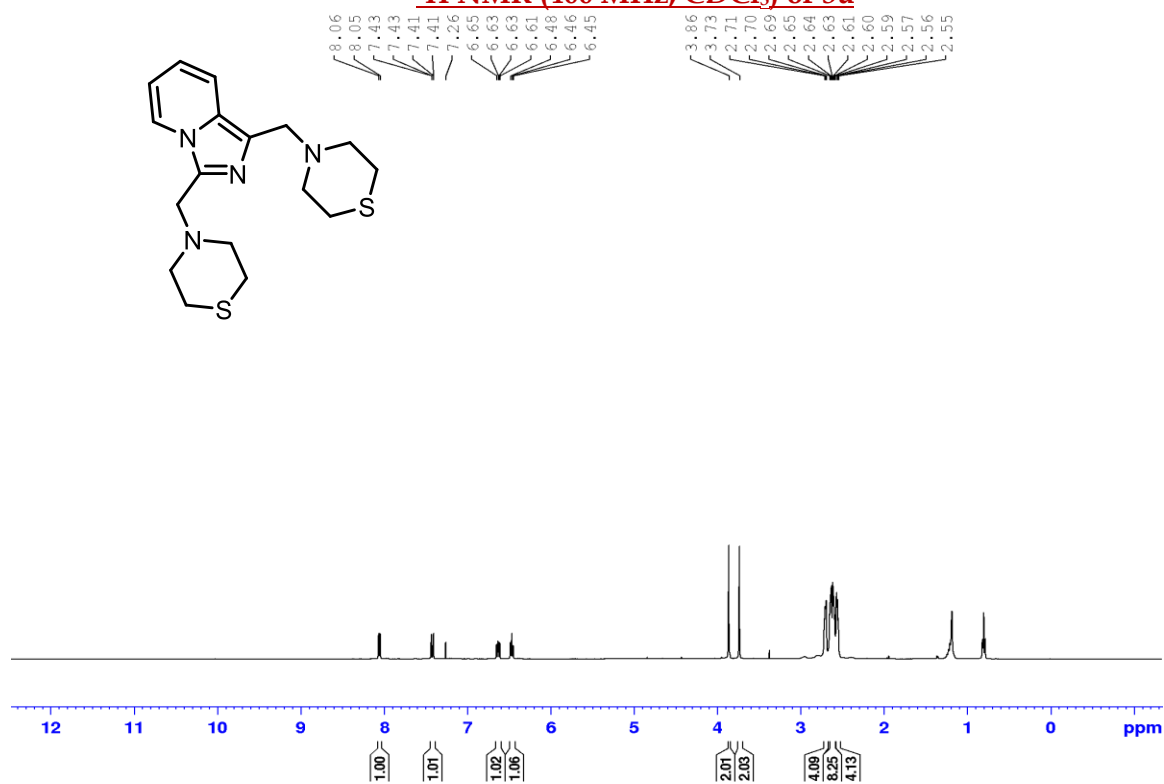

**<sup>13</sup>C[<sup>1</sup>H] NMR (101 MHz, CDCl<sub>3</sub>) of 3u**

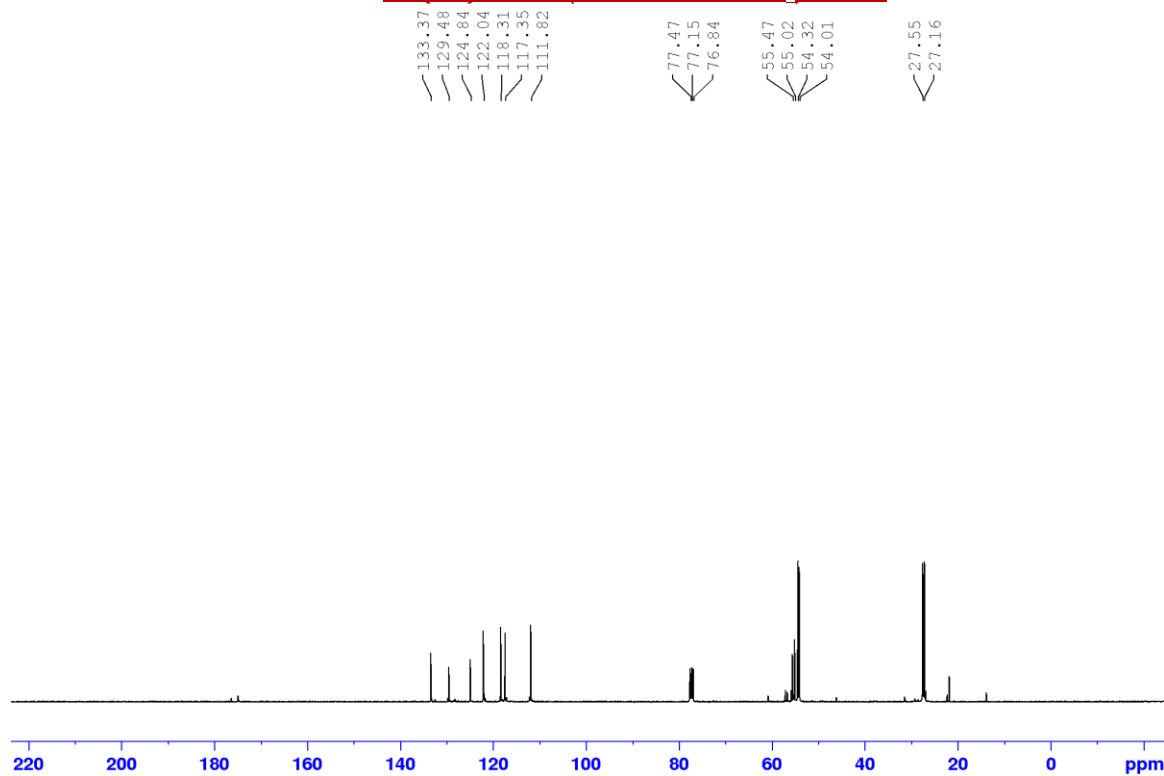

**DEPT-135 (400 MHz, CDCl<sub>3</sub>) of 3u**

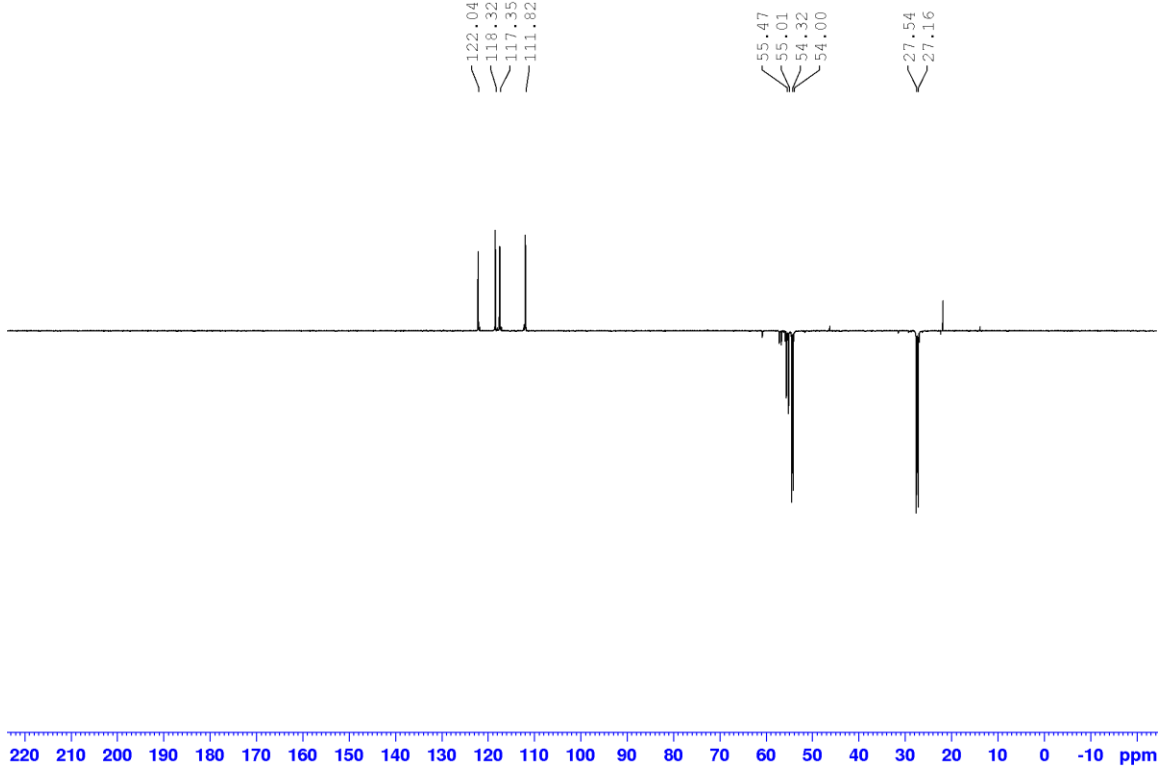

**HRMS of 3u**

**Elemental Composition Report**

Page 1

**Single Mass Analysis**

Tolerance = 50.0 PPM / DBE: min = -1.5, max = 50.0  
Element prediction: Off  
Number of isotope peaks used for i-FIT = 3

**Monoisotopic Mass, Even Electron Ions**

31 formula(e) evaluated with 1 results within limits (up to 3 closest results for each mass)

Elements Used:

C: 0-17 H: 0-100 N: 0-4 Na: 0-1 S: 0-2

SM-524

QMI DIVISION, CSIR-IIIM JAMMU  
Xevo G2-XS QTOF YFC2015

02-May-2024  
13:29:15  
1: TOF MS ES+  
2.24e+007

020524\_32 6 (0.138)

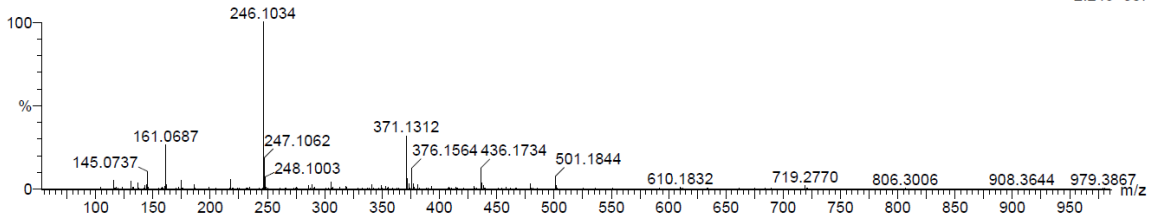

Minimum: -1.5  
Maximum: 2.0 50.0 50.0

| Mass     | Calc. Mass | mDa  | PPM  | DBE | i-FIT  | Norm | Conf (%) | Formula          |
|----------|------------|------|------|-----|--------|------|----------|------------------|
| 371.1312 | 371.1340   | -2.8 | -7.5 | 7.5 | 1133.0 | n/a  | n/a      | C17 H24 N4 Na S2 |

Single Mass Analysis

Tolerance = 50.0 PPM / DBE: min = -1.5, max = 50.0

Element prediction: Off

Number of isotope peaks used for i-FIT = 3

Monoisotopic Mass, Even Electron Ions

9 formula(e) evaluated with 1 results within limits (up to 3 closest results for each mass)

Elements Used:

C: 0-13 H: 0-100 N: 0-3 S: 0-1

SM-524

QMI DIVISION, CSIR-IIIM JAMMU  
Xevo G2-XS QTOF YFC2015

07-May-2024

14:33:46

1: TOF MS ES+

3.12e+006

070524\_37 5 (0.121) Cm (5)

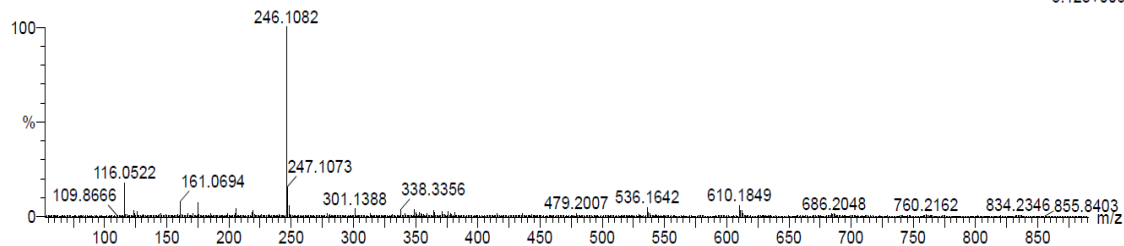

Minimum: -1.5  
Maximum: 2.0 50.0 50.0

| Mass     | Calc. Mass | mDa | PPM | DBE | i-FIT | Norm | Conf(%) | Formula      |
|----------|------------|-----|-----|-----|-------|------|---------|--------------|
| 246.1082 | 246.1065   | 1.7 | 6.9 | 7.5 | 27.1  | n/a  | n/a     | C13 H16 N3 S |

**<sup>1</sup>H NMR (400 MHz, CDCl<sub>3</sub>) of 3v**

8.16, 8.14, 7.74, 7.72, 7.54, 7.52, 7.47, 7.46, 7.44, 7.38, 7.36, 7.35, 7.35, 7.26, 6.87, 6.65, 6.63, 6.50, 6.48, 6.47, 2.80, 2.79, 2.66, 2.66

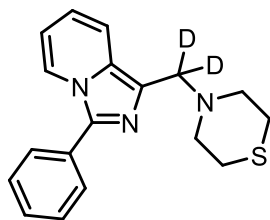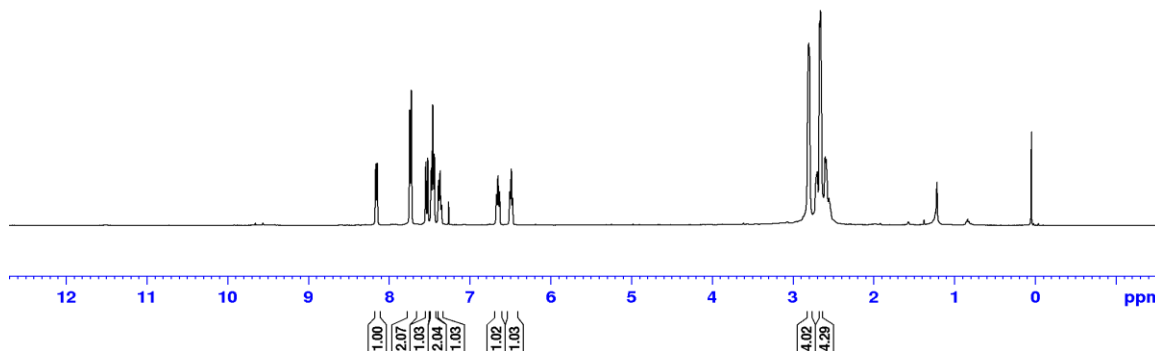

**$^{13}\text{C}\{^1\text{H}\}$  NMR (101 MHz,  $\text{CDCl}_3$ ) of 3v**

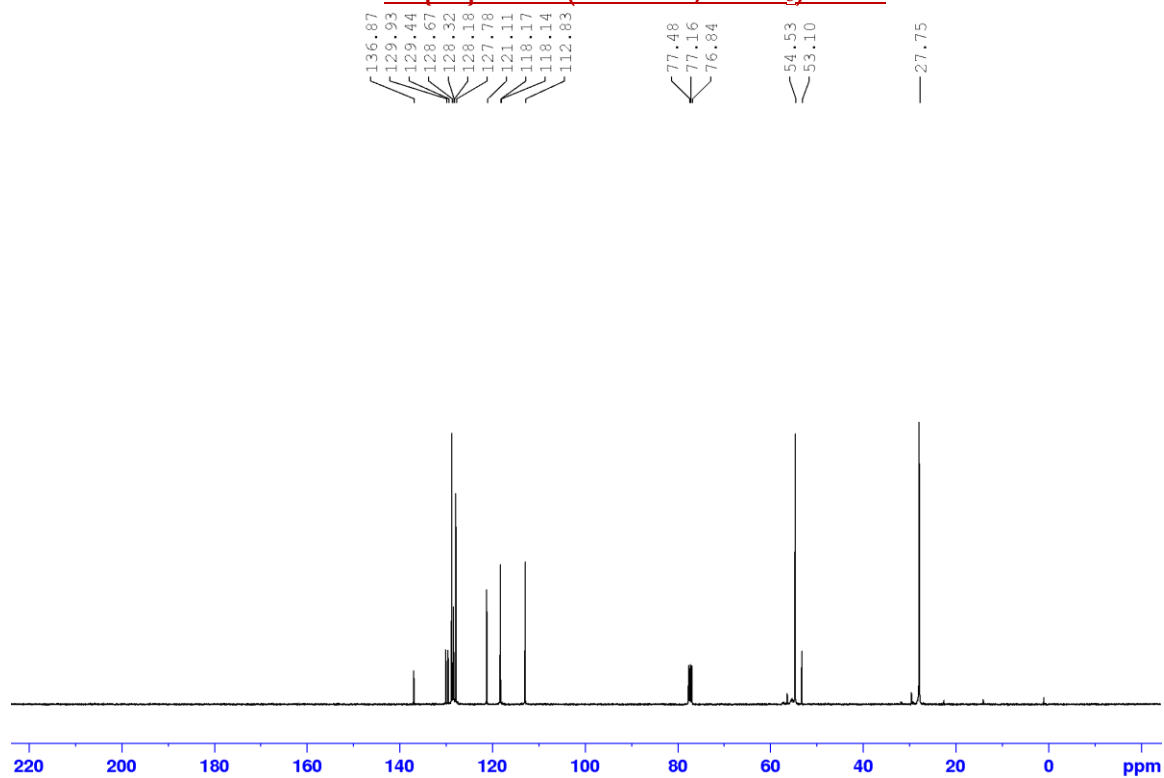

**DEPT-135 (101 MHz,  $\text{CDCl}_3$ ) of 3v**

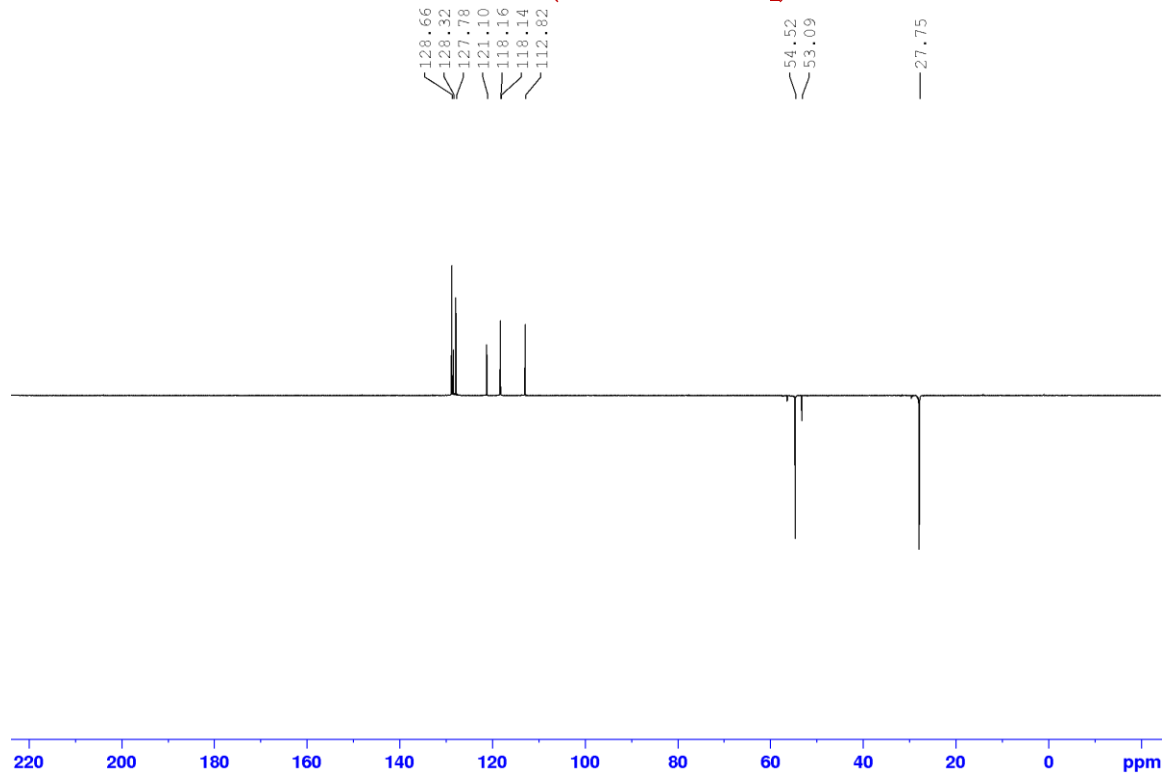

# HRMS of 3v

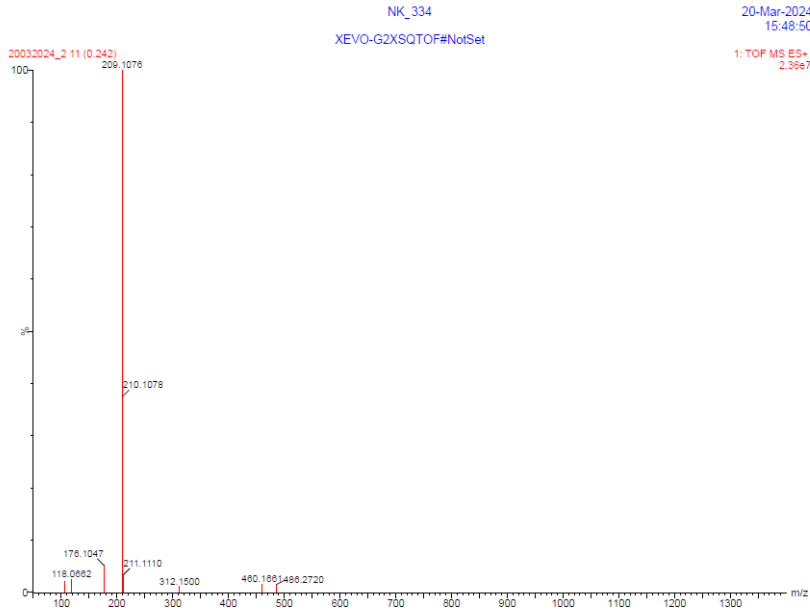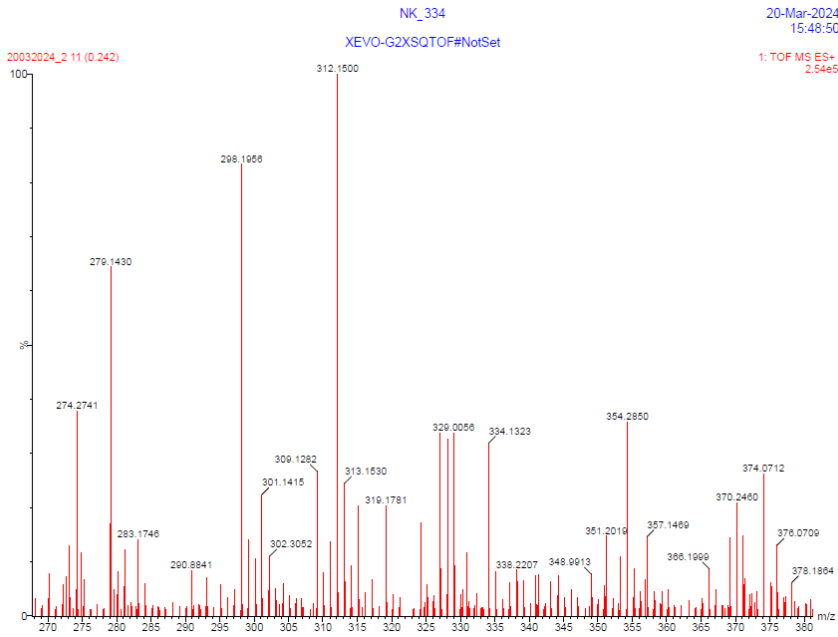

# MS/MS Spectra of 3s

SM-376

QMI DIVISION, CSIR-IIIM JAMMU  
Xevo G2-XS QTOF YFC2015

13-May-2024  
12:39:52  
1: TOF MS ES+  
3.09e7

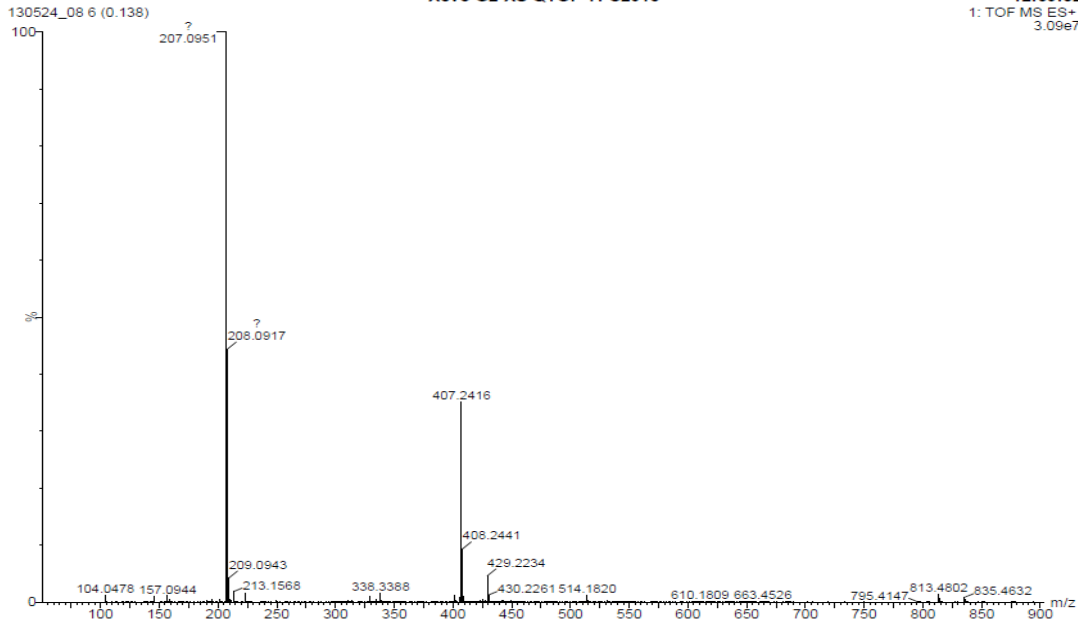

SM-376 MSMS 10V

QMI DIVISION, CSIR-IIIM JAMMU  
Xevo G2-XS QTOF YFC2015

13-May-2024  
15:00:27  
TOF MSMS 407.23ES+  
7.78e6

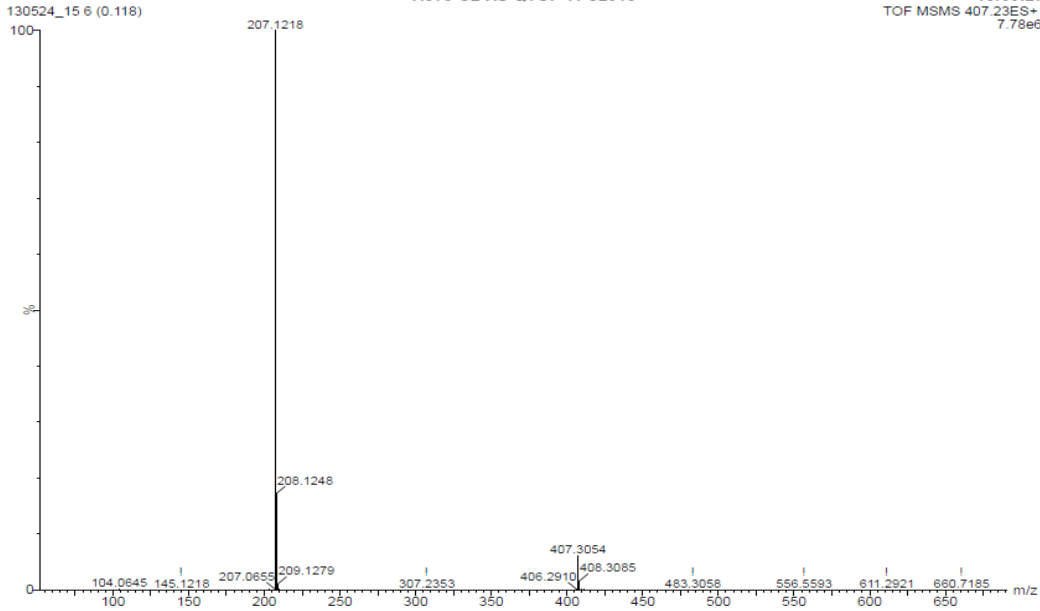

## GC-MS for Standard HCHO

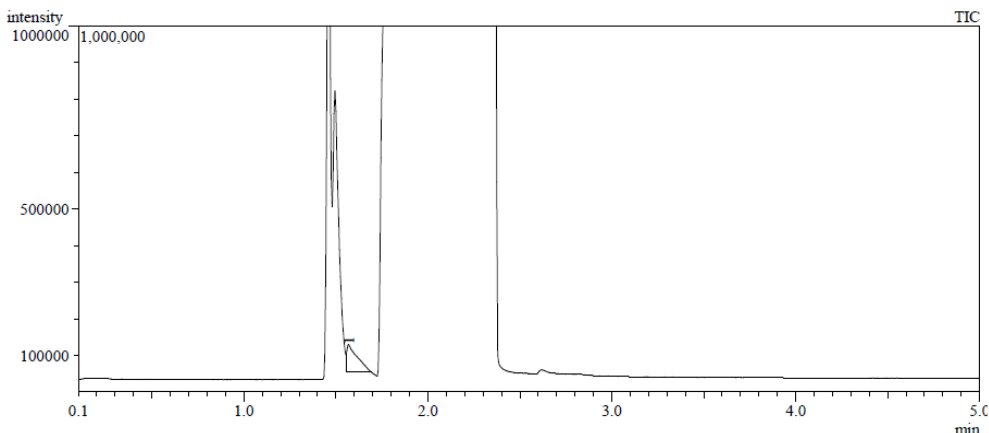

| Peak Report TIC |         |        |        |            |                    |
|-----------------|---------|--------|--------|------------|--------------------|
| Peak#           | R. Time | Area   | Area%  | Similarity | Base m/z Name      |
| 1               | 1.569   | 289295 | 100.00 | 0          | 29.00 Formaldehyde |
|                 |         | 289295 | 100.00 |            |                    |

**Library**

<< Target >>

Line#:1 R. Time:1.570(Scan#:315) MassPeaks:3  
 RawMode:Averaged 1.560-1.590(313-319) BasePeak:29.00(65222)  
 BG Mode:None Group 1 - Event 1 Q3 Scan

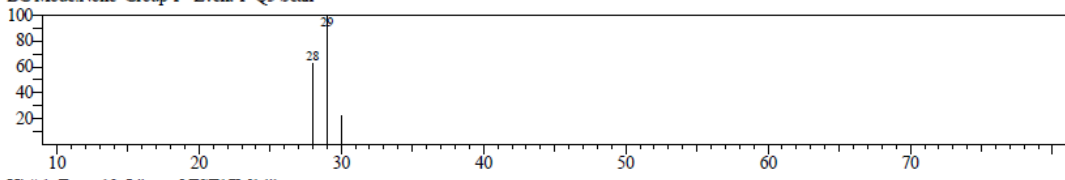

Hit#:1 Entry:12 Library:NIST17M1.lib  
 SI:90 Formula:CH2O CAS:50-00-0 MolWeight:30 RetIndex:0  
 CompName:Formaldehyde \$\$ Methanal \$\$ BFV \$\$ Fannoform \$\$ Formaldehyde, gas \$\$ Formalin \$\$ Formalith \$\$ Formic aldehyde \$\$ Formol \$\$ Fyde \$\$

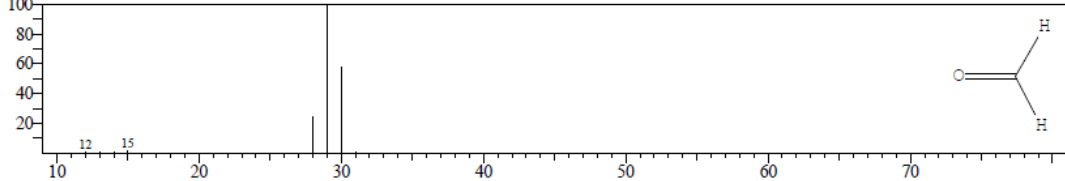

Hit#:2 Entry:10 Library:NIST17R.lib  
 SI:90 Formula:CH2O CAS:50-00-0 MolWeight:30 RetIndex:0  
 CompName:Formaldehyde \$\$ Methanal \$\$ BFV \$\$ Fannoform \$\$ Formaldehyde, gas \$\$ Formalin \$\$ Formalith \$\$ Formic aldehyde \$\$ Formol \$\$ Fyde \$\$

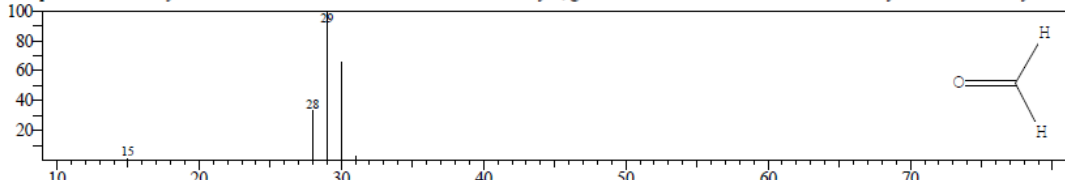

Hit#:3 Entry:11 Library:NIST17R.lib  
 SI:87 Formula:CH2O CAS:50-00-0 MolWeight:30 RetIndex:0  
 CompName:Formaldehyde \$\$ Methanal \$\$ BFV \$\$ Fannoform \$\$ Formaldehyde, gas \$\$ Formalin \$\$ Formalith \$\$ Formic aldehyde \$\$ Formol \$\$ Fyde \$\$

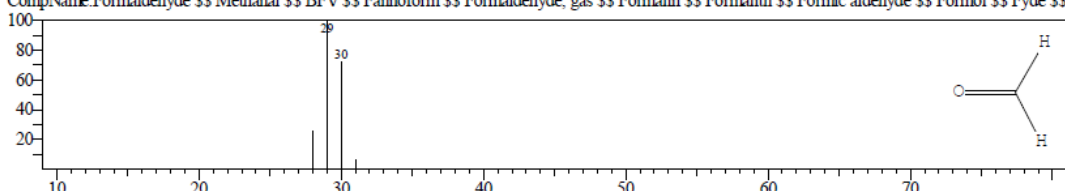

### GC-MS for reaction A

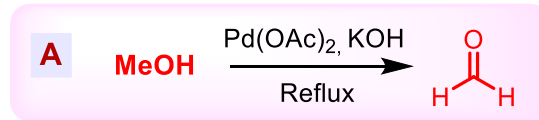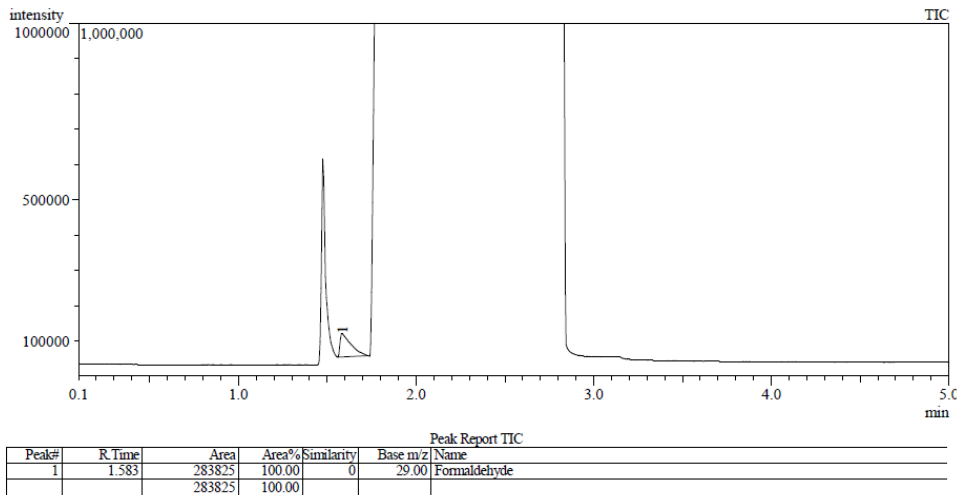

### GCMS for reaction B

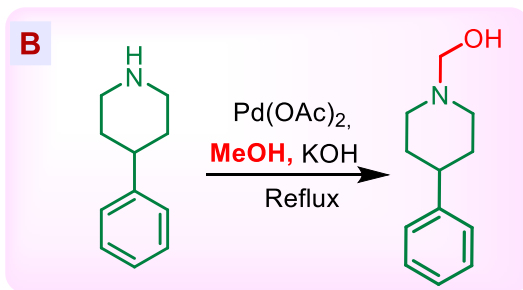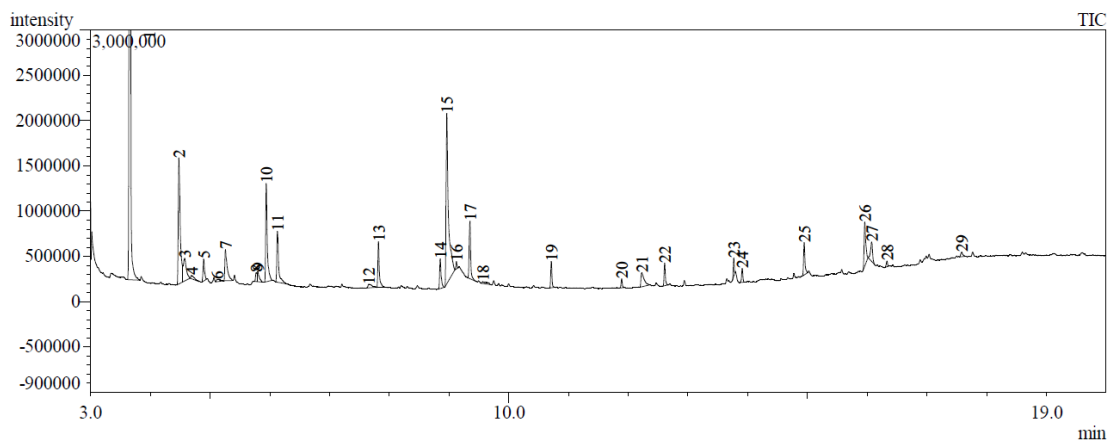



## Library for reaction A

### Library

<< Target >>

Line# 1 RTime: 1.585 (Scan# 318) MassPeaks: 3  
RawMode: Averaged 1.565-1.605 (314-322) BasePeak: 29.00 (30142)  
BG Mode: 1.715 (344) Group 1 - Event 1 Q3 Scan

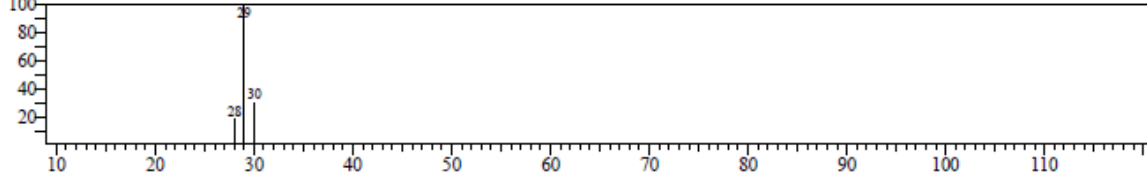

Hit# 1 Entry: 12 Library: NIST17M1.lib  
SI: 95 Formula: CH2O CAS: 50-00-0 MolWeight: 30 RetIndex: 0  
CompName: Formaldehyde \$\$ Methanal \$\$ BFV \$\$ Fannoform \$\$ Formaldehyde, gas \$\$ Formalin \$\$ Formalith \$\$ Formic aldehyde \$\$ Formol \$\$ Fyde \$\$

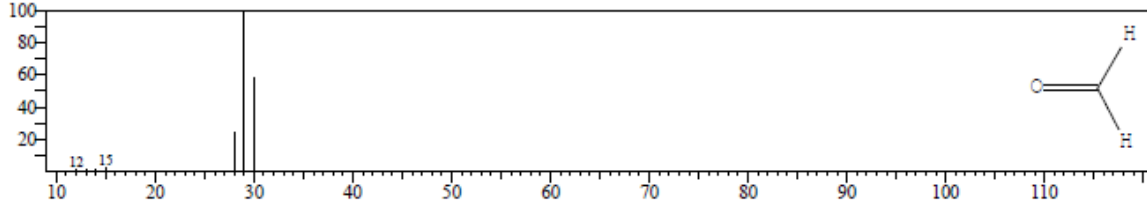

Hit# 2 Entry: 584 Library: NIST17R.lib  
SI: 92 Formula: C2H5NO2 CAS: 79-24-3 MolWeight: 75 RetIndex: 602  
CompName: Ethane, nitro- \$\$ Nitroethane \$\$ C2H5NO2 \$\$ Nitroetan \$\$ UN 2842 \$\$ NE \$\$ Nitroparaffin \$\$ 1-Nitroethane #

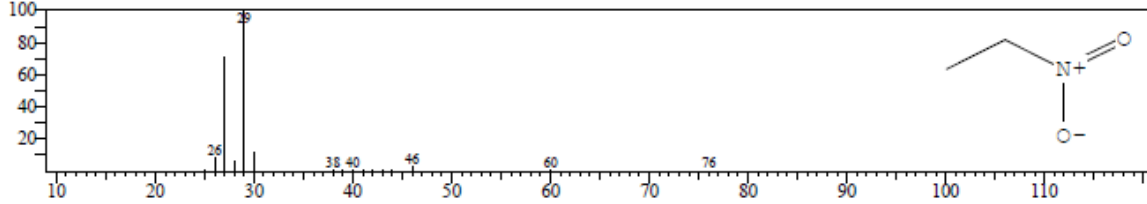

Hit# 3 Entry: 10 Library: NIST17R.lib  
SI: 92 Formula: CH2O CAS: 50-00-0 MolWeight: 30 RetIndex: 0  
CompName: Formaldehyde \$\$ Methanal \$\$ BFV \$\$ Fannoform \$\$ Formaldehyde, gas \$\$ Formalin \$\$ Formalith \$\$ Formic aldehyde \$\$ Formol \$\$ Fyde \$\$

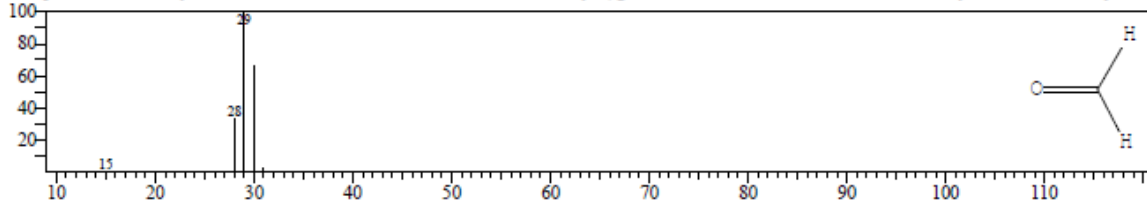

Hit# 4 Entry: 11 Library: NIST17R.lib  
SI: 91 Formula: CH2O CAS: 50-00-0 MolWeight: 30 RetIndex: 0  
CompName: Formaldehyde \$\$ Methanal \$\$ BFV \$\$ Fannoform \$\$ Formaldehyde, gas \$\$ Formalin \$\$ Formalith \$\$ Formic aldehyde \$\$ Formol \$\$ Fyde \$\$

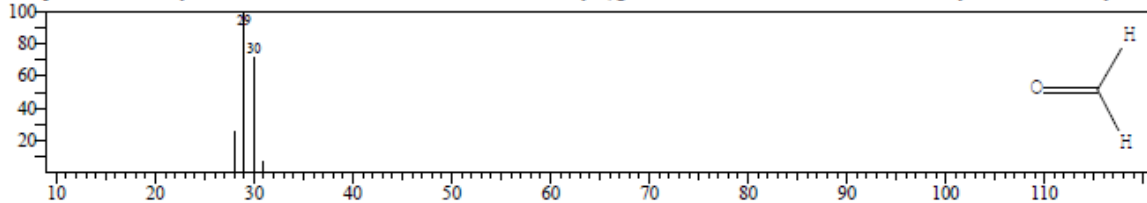

## Library for reaction B

<< Target >>

Line#:18 R.Time:9.565(Scan#:1314) MassPeaks:221  
RawMode:Averaged 9.560-9.570(1313-1315) BasePeak:191.10(6936)  
BG Mode:Calc. from Peak Group 1 - Event 1 Q3 Scan

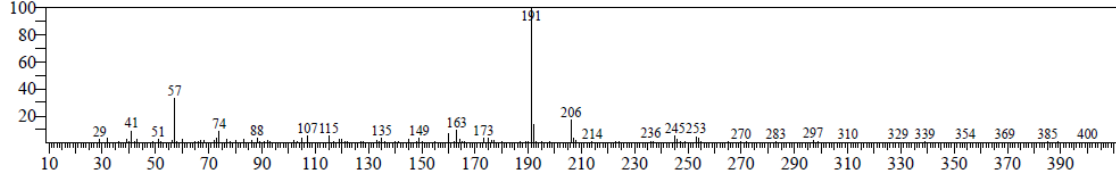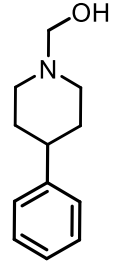

Hit#1 Entry:54577 Library:NIST17M1.lib

SI:80 Formula:C14H22O CAS:96-76-4 MolWeight:206 RetIndex:1555

CompName:2,4-Di-tert-butylphenol \$\$ Phenol, 2,4-bis(1,1-dimethylethyl)- \$\$ Phenol, 2,4-di-tert-butyl- \$\$ 2,4-di-t-Butylphenol \$\$ 1-Hydroxy-2,4-di-tert-bu

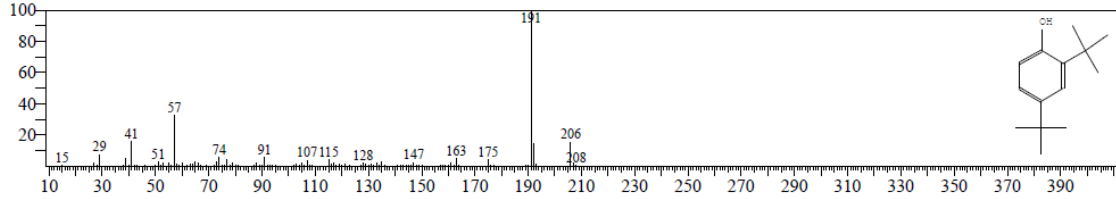

Hit#2 Entry:22784 Library:NIST17R.lib

SI:79 Formula:C14H22O CAS:96-76-4 MolWeight:206 RetIndex:1555

CompName:2,4-Di-tert-butylphenol \$\$ Phenol, 2,4-bis(1,1-dimethylethyl)- \$\$ Phenol, 2,4-di-tert-butyl- \$\$ 2,4-di-t-Butylphenol \$\$ 1-Hydroxy-2,4-di-tert-bu

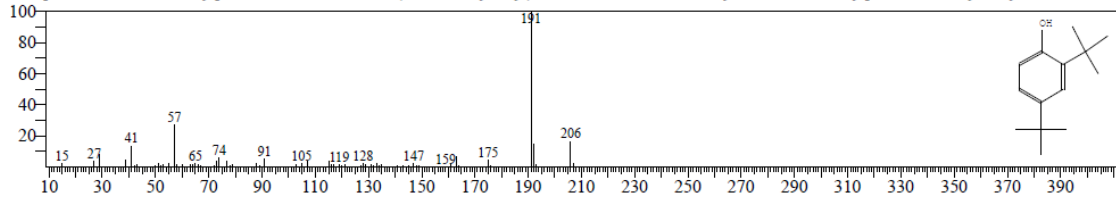

Hit#3 Entry:22787 Library:NIST17R.lib

SI:79 Formula:C14H22O CAS:1138-52-9 MolWeight:206 RetIndex:1555

CompName:Phenol, 3,5-bis(1,1-dimethylethyl)- \$\$ Phenol, 3,5-di-tert-butyl- \$\$ 3,5-Di-tert-butylphenol \$\$ Phenol, 3,5-bis(t-butyl) \$\$ 3,5-Di-t-butylphenol \$

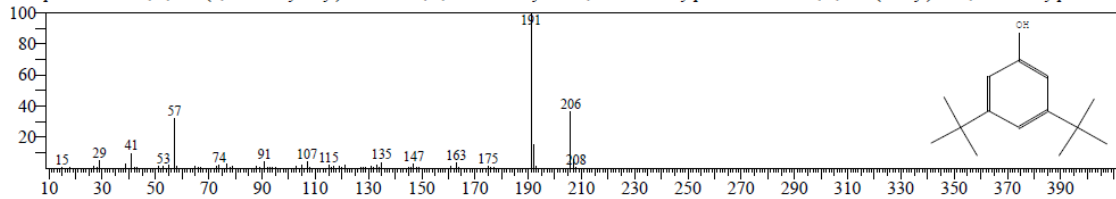

**<sup>1</sup>H NMR (400 MHz, CDCl<sub>3</sub>) of 5a**

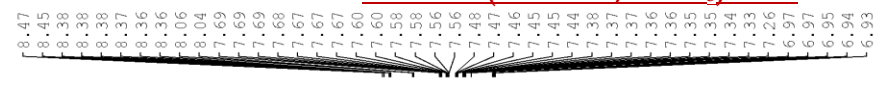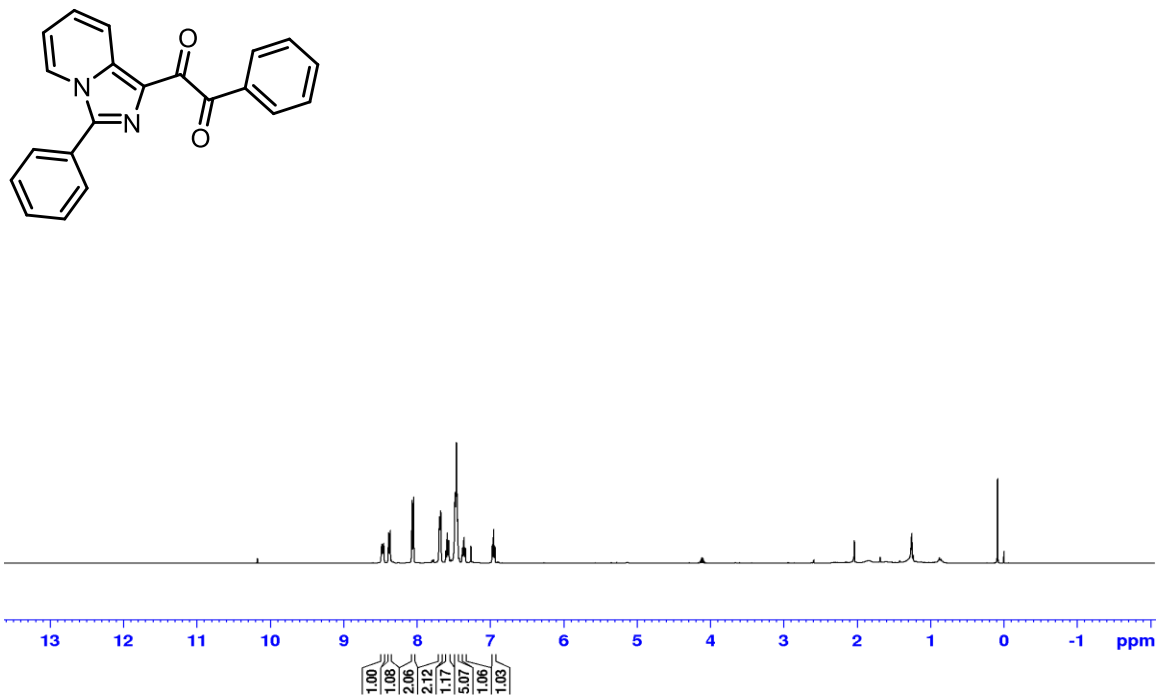

**<sup>13</sup>C(<sup>1</sup>H) NMR (101 MHz, CDCl<sub>3</sub>) of 5a**

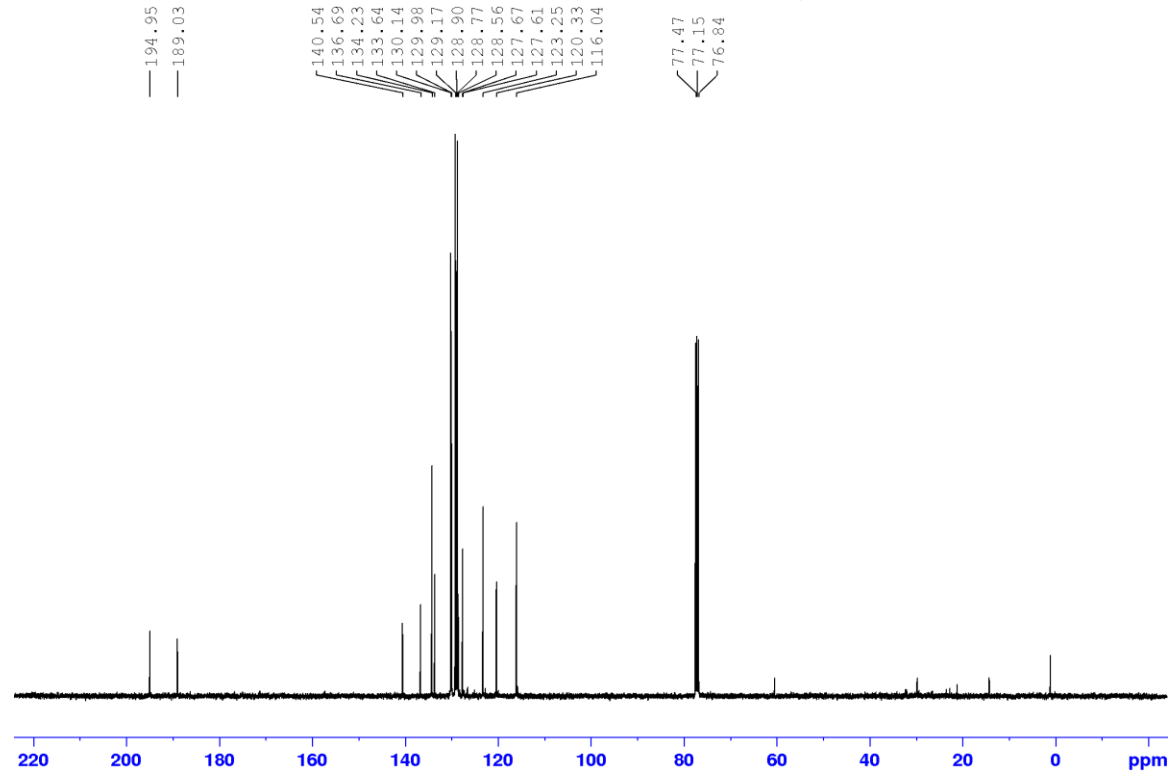

## HRMS of 5a

### Elemental Composition Report

Page 1

#### Single Mass Analysis

Tolerance = 50.0 PPM / DBE: min = -1.5, max = 50.0

Element prediction: Off

Number of isotope peaks used for i-FIT = 3

Monoisotopic Mass, Even Electron Ions

13 formula(e) evaluated with 1 results within limits (up to 3 closest results for each mass)

Elements Used:

C: 0-21 H: 0-100 N: 0-2 O: 0-2

SM-339

QMI DIVISION, CSIR-IIIM JAMMU  
Xevo G2-XS QTOF YFC2015

02-May-2024

13:13:03

1: TOF MS ES+

4.95e+007

020524\_26 6 (0.138)

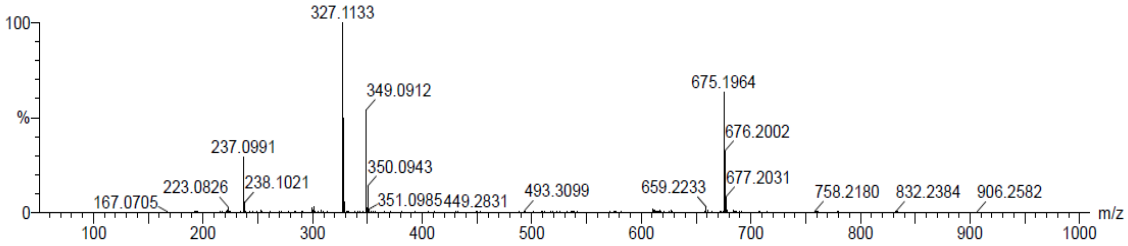

Minimum: -1.5  
Maximum: 2.0 50.0 50.0

| Mass     | Calc. Mass | mDa  | PPM  | DBE  | i-FIT  | Norm | Conf(%) | Formula       |
|----------|------------|------|------|------|--------|------|---------|---------------|
| 327.1133 | 327.1134   | -0.1 | -0.3 | 15.5 | 1061.9 | n/a  | n/a     | C21 H15 N2 O2 |

### <sup>1</sup>H NMR (400 MHz, CDCl<sub>3</sub>) of 5b

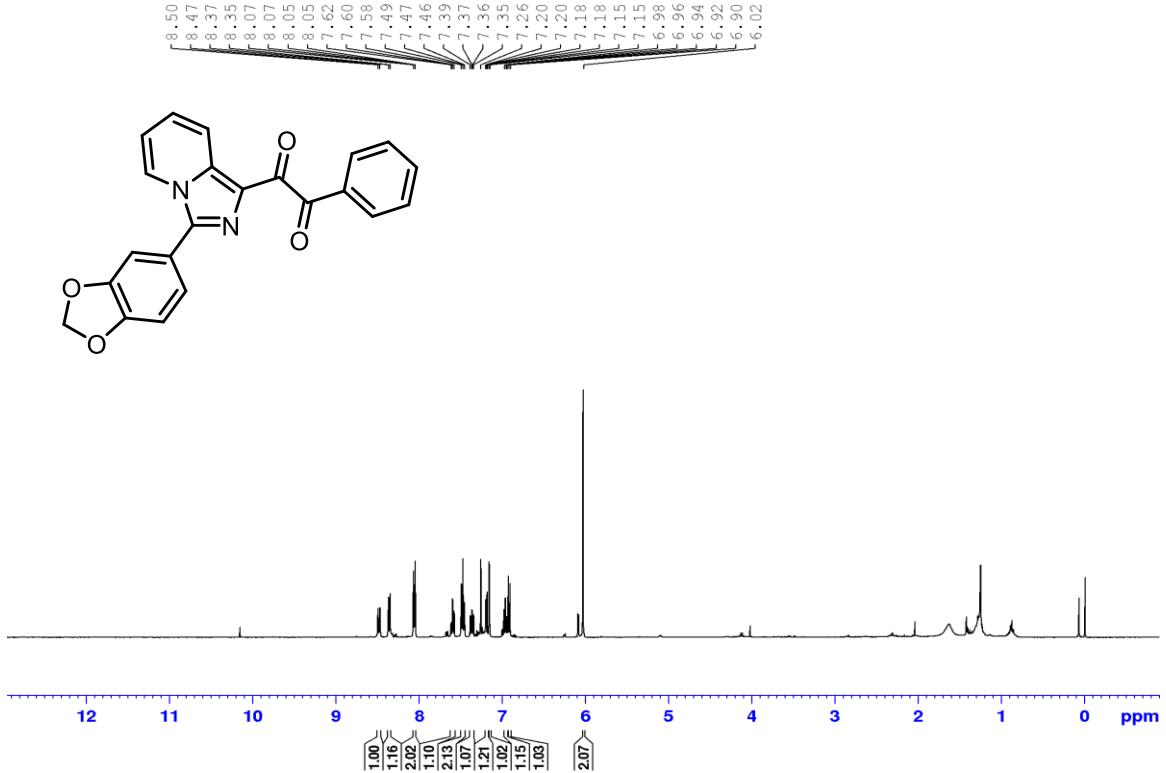

**<sup>13</sup>C{<sup>1</sup>H} NMR (101 MHz, CDCl<sub>3</sub>) of 5b**

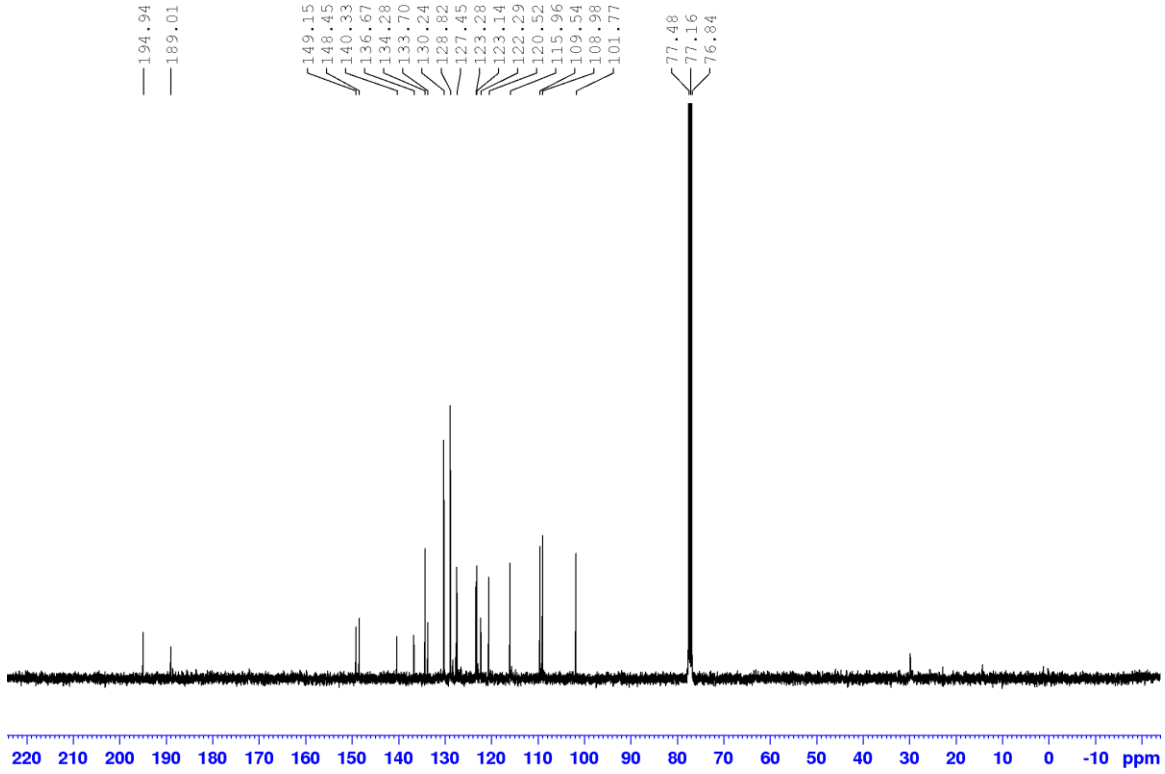

**HRMS of 5b**

**Elemental Composition Report**

Page 1

**Single Mass Analysis**

Tolerance = 50.0 PPM / DBE: min = -1.5, max = 50.0

Element prediction: Off

Number of isotope peaks used for i-FIT = 3

Monoisotopic Mass, Even Electron Ions

21 formula(e) evaluated with 1 results within limits (up to 3 closest results for each mass)

Elements Used:

C: 0-22 H: 0-100 N: 0-2 O: 0-4

SM-502

QMI DIVISION, CSIR-IIIM JAMMU  
Xevo G2-XS QTOF YFC2015

30-Apr-2024

12:00:41

1: TOF MS ES+

1.18e+007

300424\_10 5 (0.121)

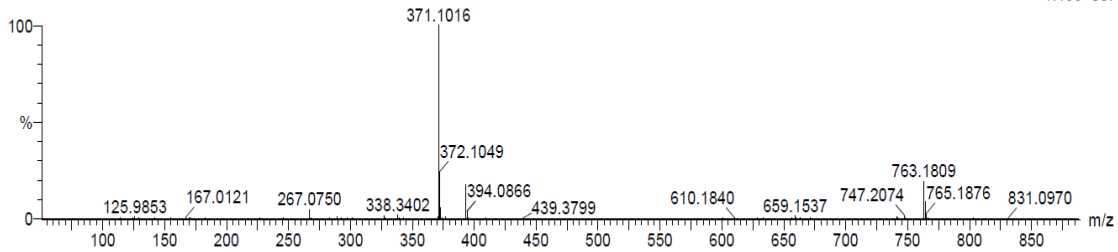

Minimum: -1.5  
Maximum: 2.0 50.0 50.0

| Mass     | Calc. Mass | mDa  | PPM  | DBE  | i-FIT  | Norm | Conf (%) | Formula       |
|----------|------------|------|------|------|--------|------|----------|---------------|
| 371.1016 | 371.1032   | -1.6 | -4.3 | 16.5 | 1090.3 | n/a  | n/a      | C22 H15 N2 O4 |

**<sup>1</sup>H NMR (400 MHz, CDCl<sub>3</sub>) of 5c**

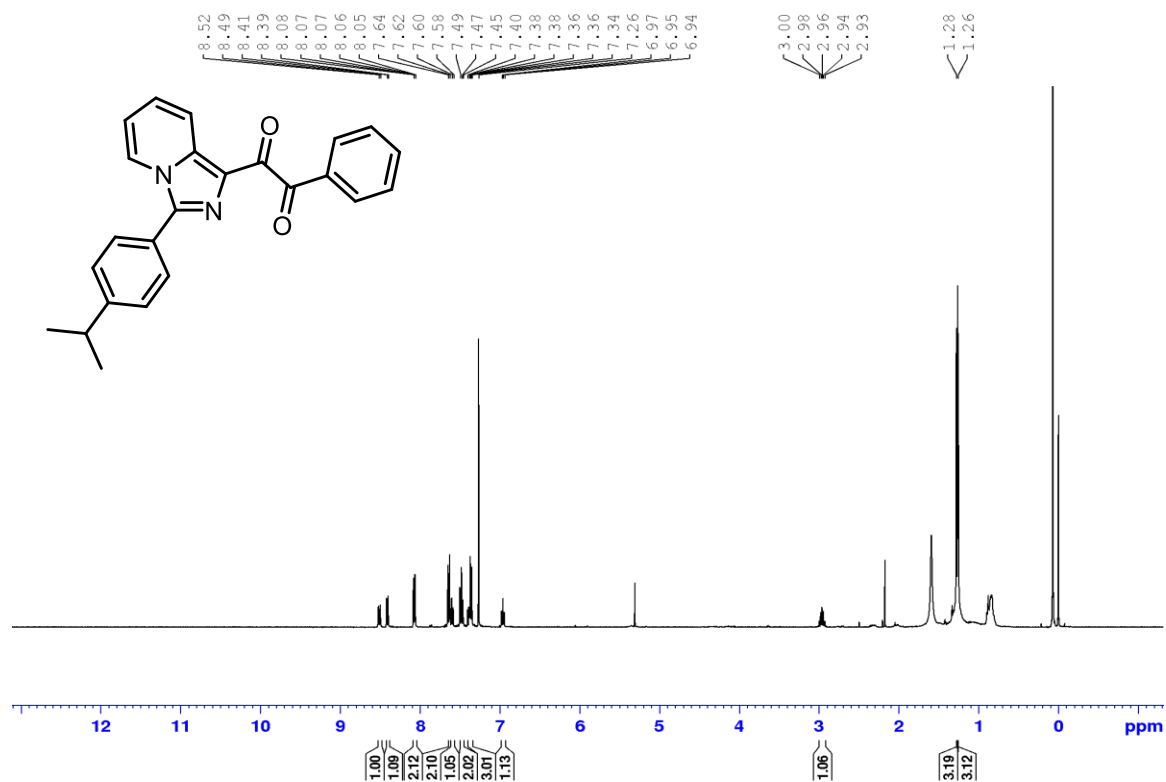

**<sup>13</sup>C[<sup>1</sup>H] NMR (101 MHz, CDCl<sub>3</sub>) of 5c**

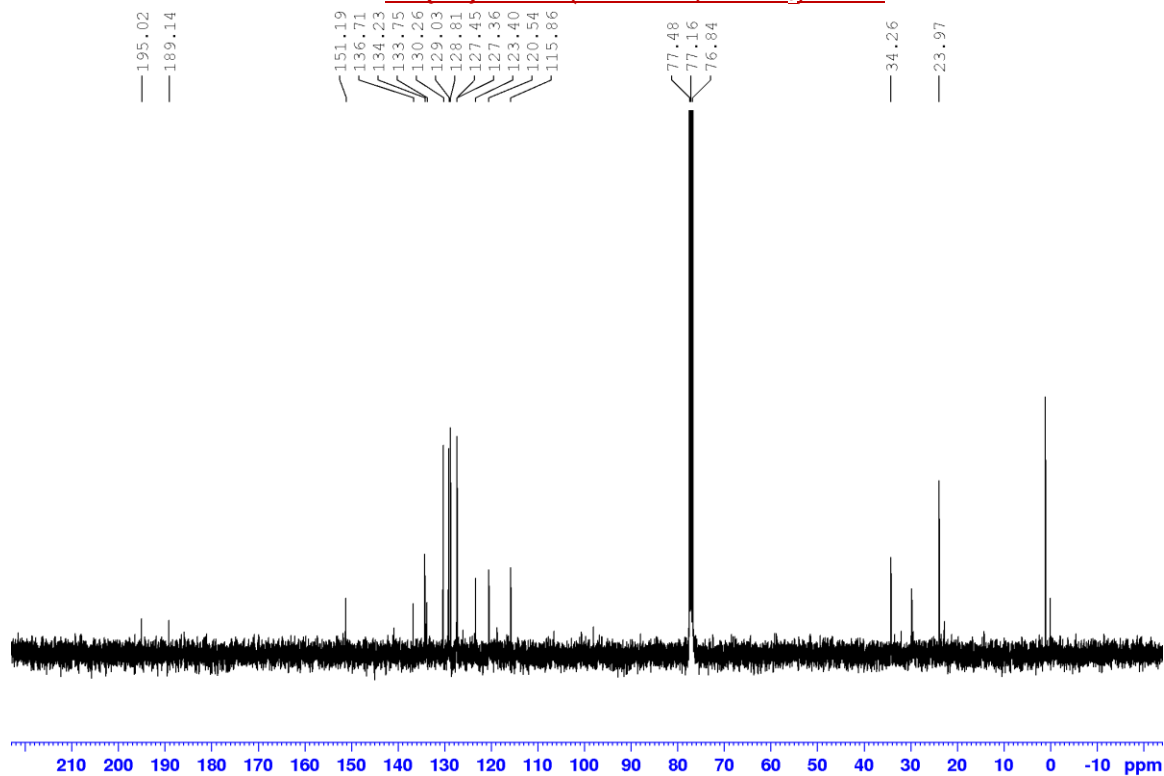

# HRMS of 5c

## Elemental Composition Report

Page 1

### Single Mass Analysis

Tolerance = 50.0 PPM / DBE: min = -1.5, max = 50.0

Element prediction: Off

Number of isotope peaks used for i-FIT = 3

Monoisotopic Mass, Even Electron Ions

13 formula(e) evaluated with 1 results within limits (up to 3 closest results for each mass)

Elements Used:

C: 0-24 H: 0-100 N: 0-2 O: 0-2

SM-395

QMI DIVISION, CSIR-IIIM JAMMU  
Xevo G2-XS QTOF YFC2015

30-Apr-2024

11:42:36

1: TOF MS ES+

5.83e+005

300424\_03 4 (0.104) Cm (4)

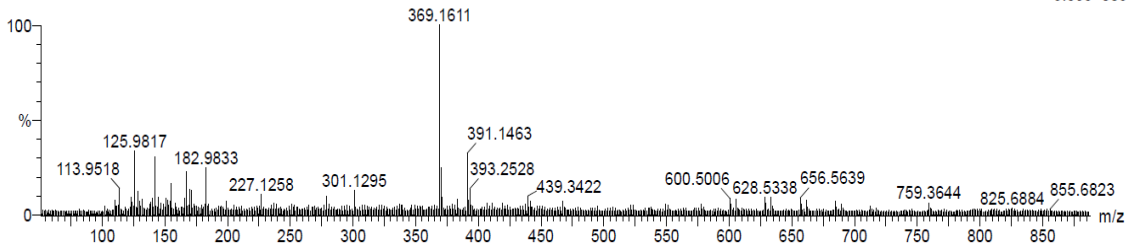

Minimum: -1.5  
Maximum: 2.0 50.0 50.0

| Mass     | Calc. Mass | mDa | PPM | DBE  | i-FIT | Norm | Conf (%) | Formula       |
|----------|------------|-----|-----|------|-------|------|----------|---------------|
| 369.1611 | 369.1603   | 0.8 | 2.2 | 15.5 | 57.3  | n/a  | n/a      | C24 H21 N2 O2 |

## <sup>1</sup>H NMR (400 MHz, CDCl<sub>3</sub>) of 5d

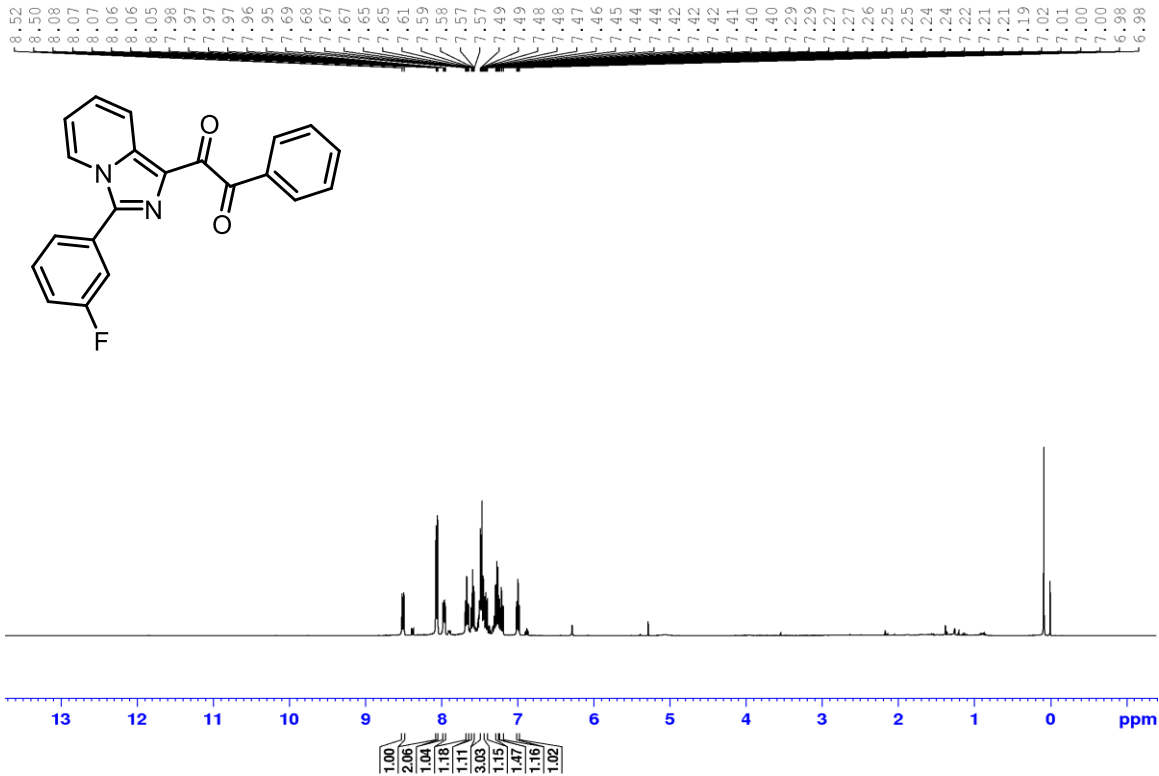

**$^{13}\text{C}\{^1\text{H}\}$  NMR (101 MHz,  $\text{CDCl}_3$ ) of 5d**

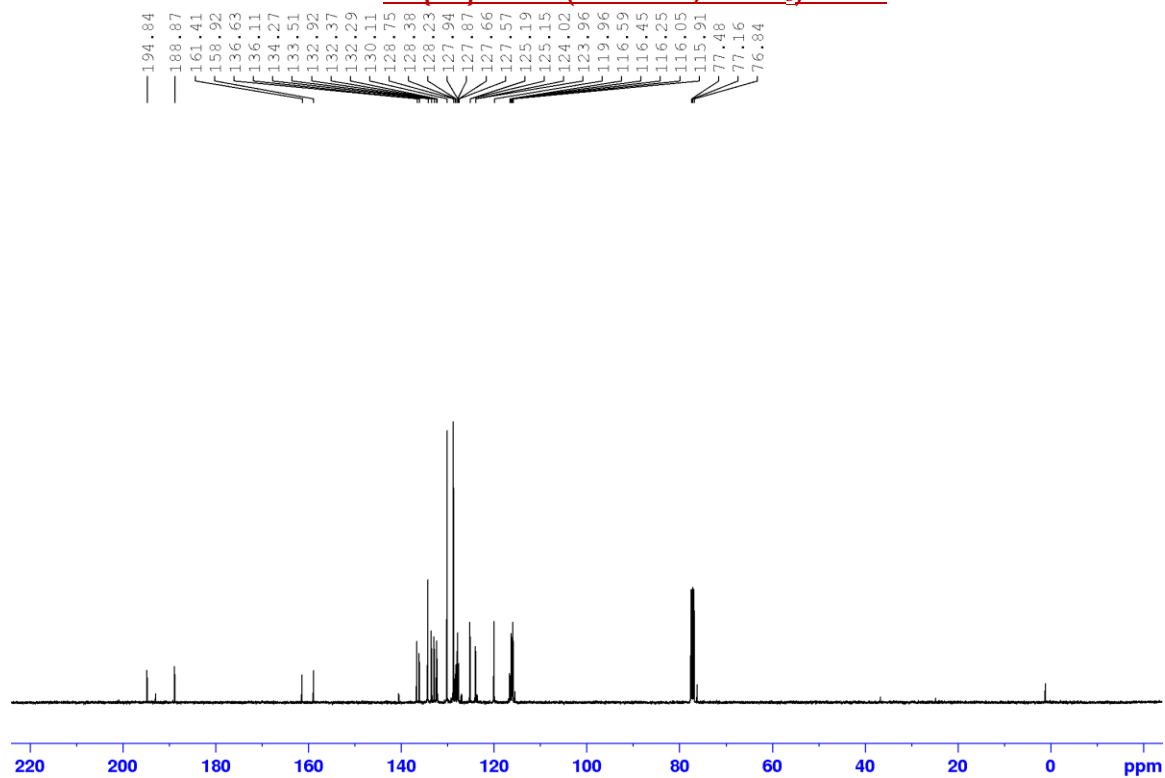

**$^{19}\text{F}$  NMR (377 MHz,  $\text{CDCl}_3$ ) of 5d**

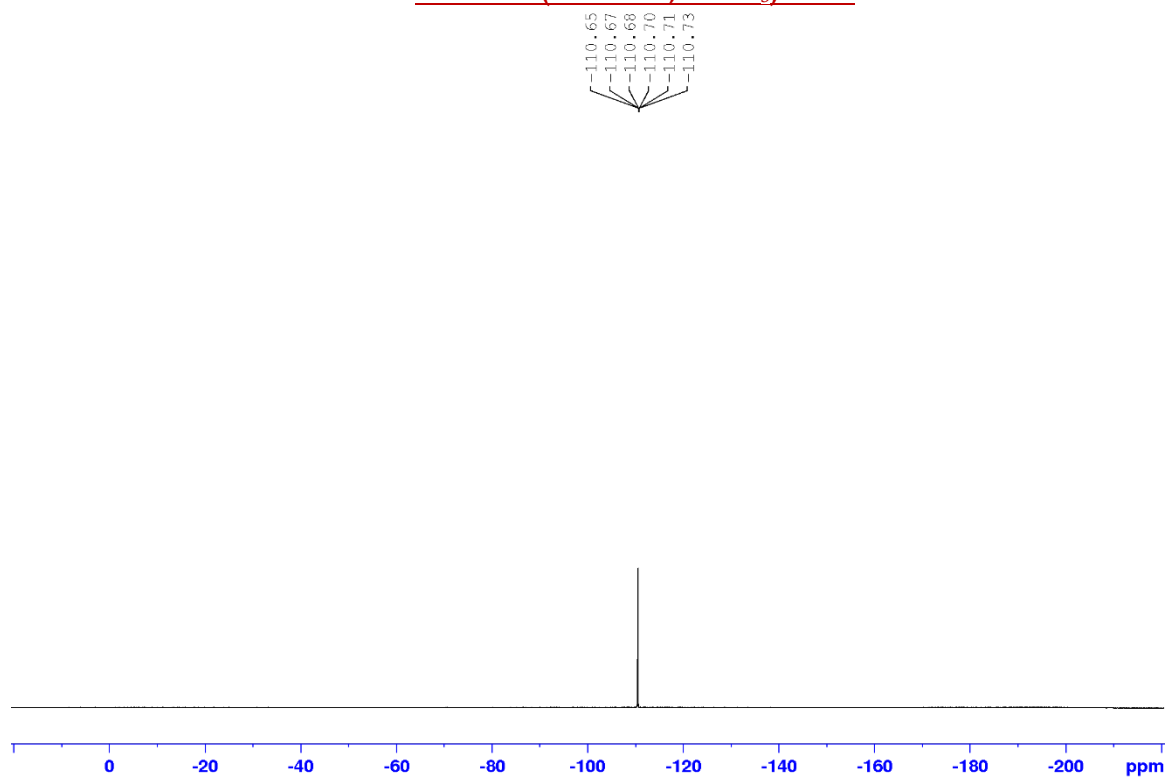



## HRMS of 5d

### Elemental Composition Report

Page 1

#### Single Mass Analysis

Tolerance = 50.0 PPM / DBE: min = -1.5, max = 50.0

Element prediction: Off

Number of isotope peaks used for i-FIT = 3

Monoisotopic Mass, Even Electron Ions

23 formula(e) evaluated with 1 results within limits (up to 3 closest results for each mass)

Elements Used:

C: 0-21 H: 0-100 N: 0-2 O: 0-2 F: 0-1

SM-386

QMI DIVISION, CSIR-IIIM JAMMU  
Xevo G2-XS QTOF YFC2015

30-Apr-2024

11:52:52

1: TOF MS ES+  
2.28e+007

300424\_07 5 (0.121)

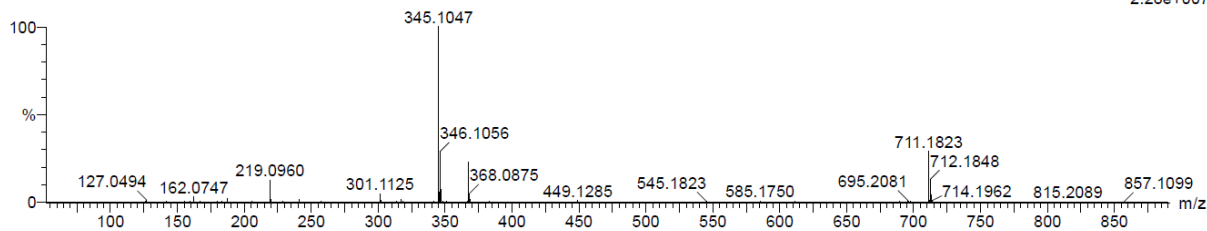

Minimum: -1.5  
Maximum: 2.0 50.0 50.0

| Mass     | Calc. Mass | mDa | PPM | DBE  | i-FIT  | Norm | Conf (%) | Formula         |
|----------|------------|-----|-----|------|--------|------|----------|-----------------|
| 345.1047 | 345.1039   | 0.8 | 2.3 | 15.5 | 1171.1 | n/a  | n/a      | C21 H14 N2 O2 F |

### <sup>1</sup>H NMR (400 MHz, CDCl<sub>3</sub>) of 5e

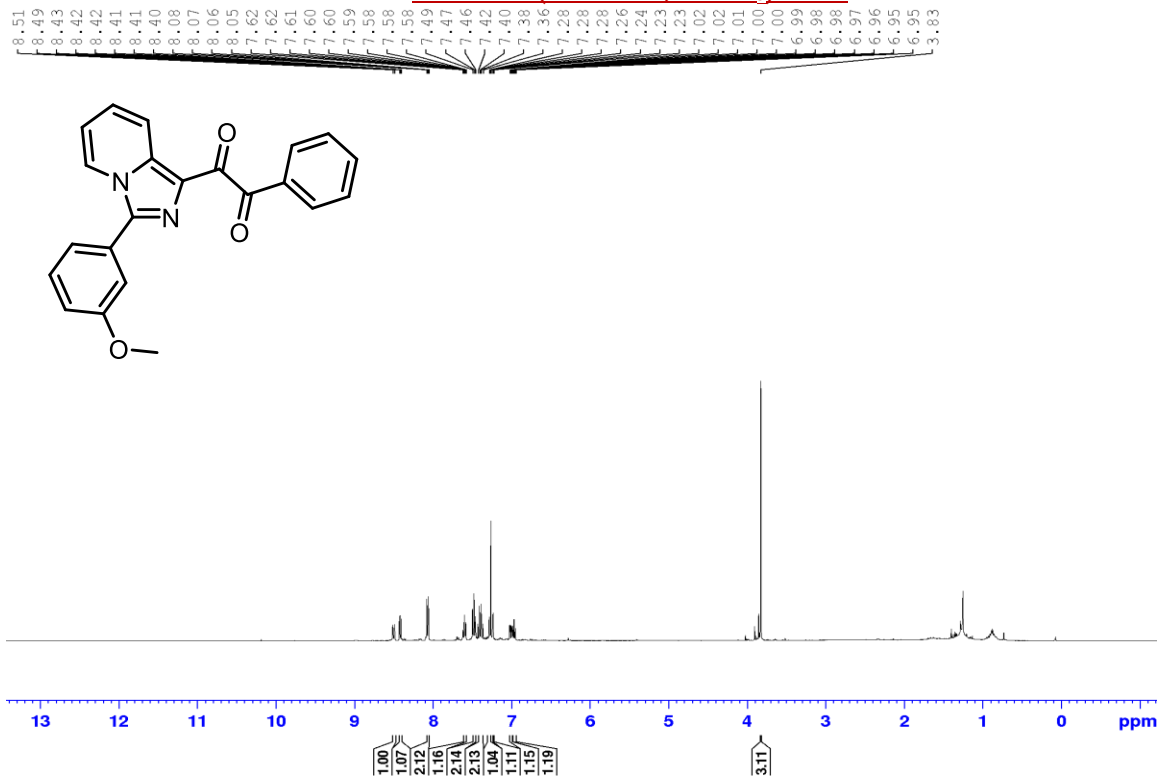

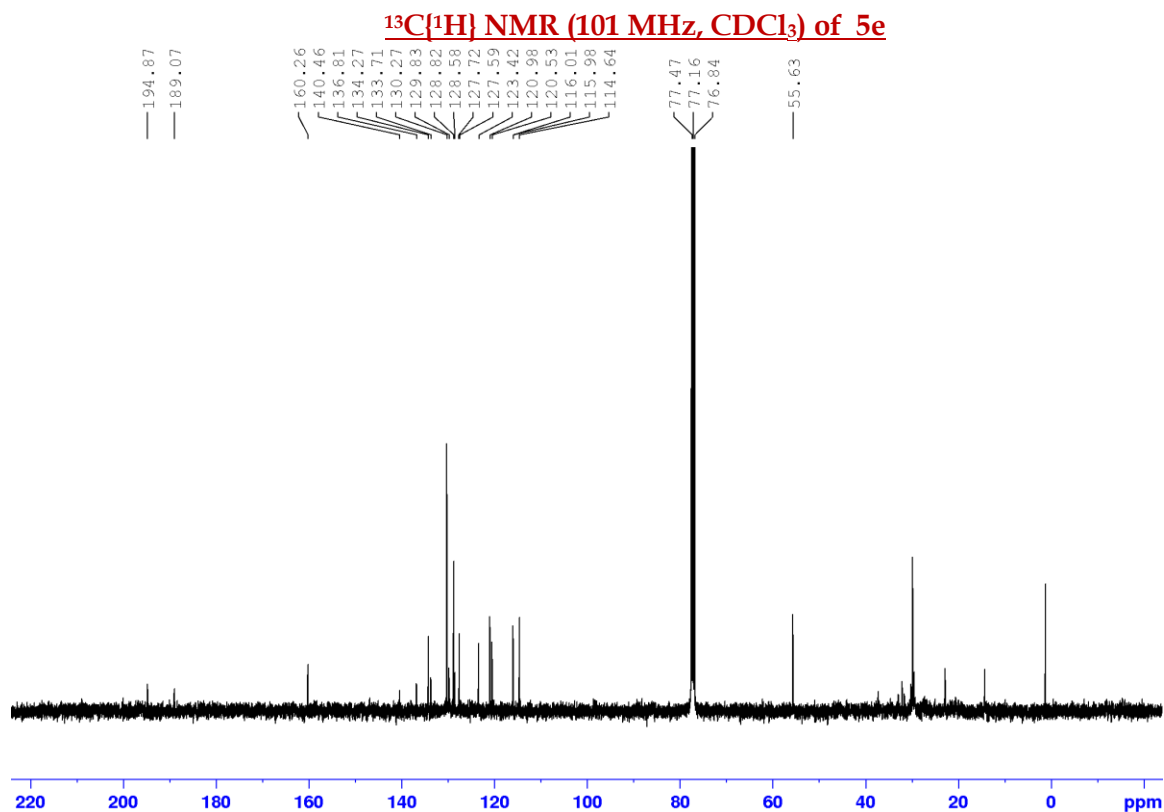

**HRMS of 5e**

**Elemental Composition Report**

Page 1

**Single Mass Analysis**

Tolerance = 50.0 PPM / DBE: min = -1.5, max = 50.0

Element prediction: Off

Number of isotope peaks used for i-FIT = 3

Monoisotopic Mass, Even Electron Ions

16 formula(e) evaluated with 1 results within limits (up to 3 closest results for each mass)

Elements Used:

C: 0-22 H: 0-100 N: 0-2 O: 0-3

SM-413

QMI DIVISION, CSIR-IIIM JAMMU  
Xevo G2-XS QTOF YFC2015

02-May-2024

13:15:46

1: TOF MS ES+

2.54e+007

020524\_27 6 (0.138)

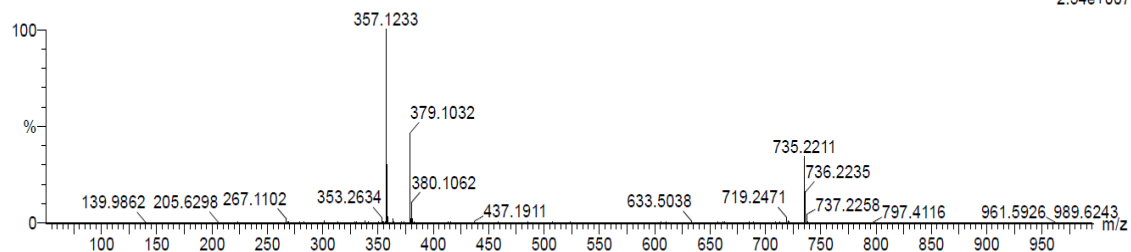

Minimum: -1.5  
Maximum: 2.0 50.0 50.0

| Mass     | Calc. Mass | mDa  | PPM  | DBE  | i-FIT  | Norm | Conf (%) | Formula       |
|----------|------------|------|------|------|--------|------|----------|---------------|
| 357.1233 | 357.1239   | -0.6 | -1.7 | 15.5 | 1087.1 | n/a  | n/a      | C22 H17 N2 O3 |

**$^1\text{H}$  NMR (400 MHz,  $\text{CDCl}_3$ ) of 5f**

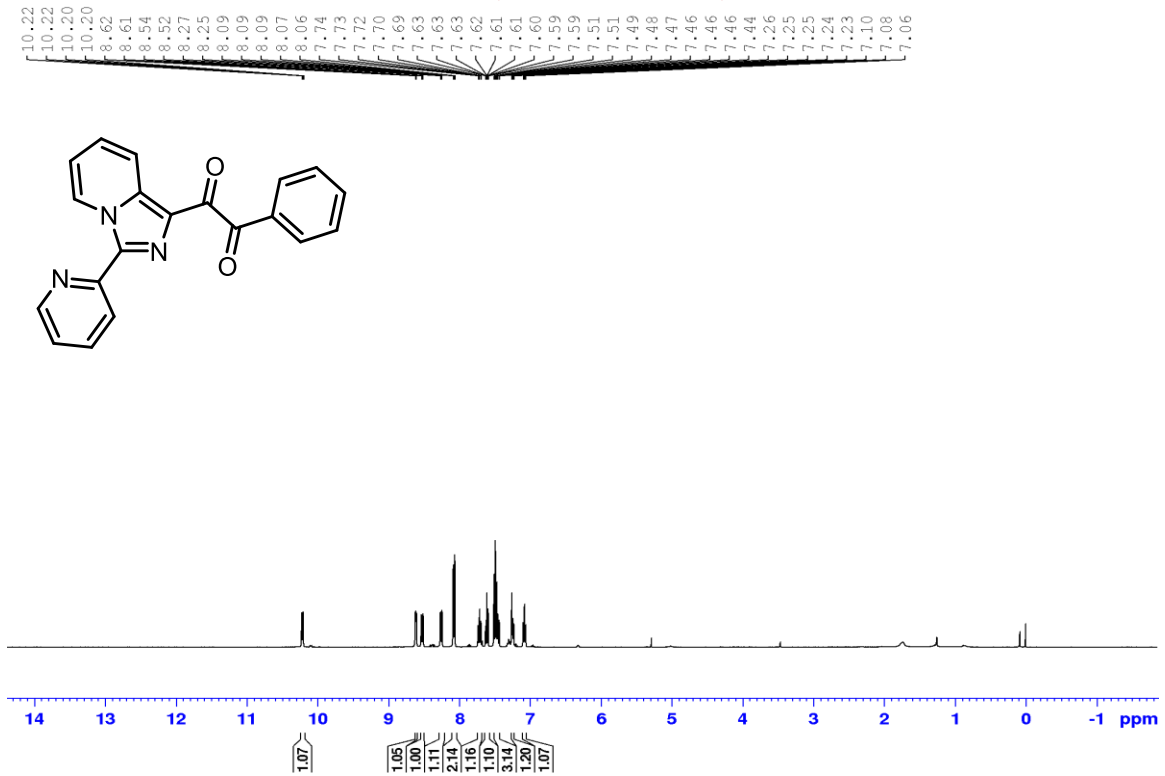

**$^{13}\text{C}\{^1\text{H}\}$  NMR (101 MHz,  $\text{CDCl}_3$ ) of 5f**

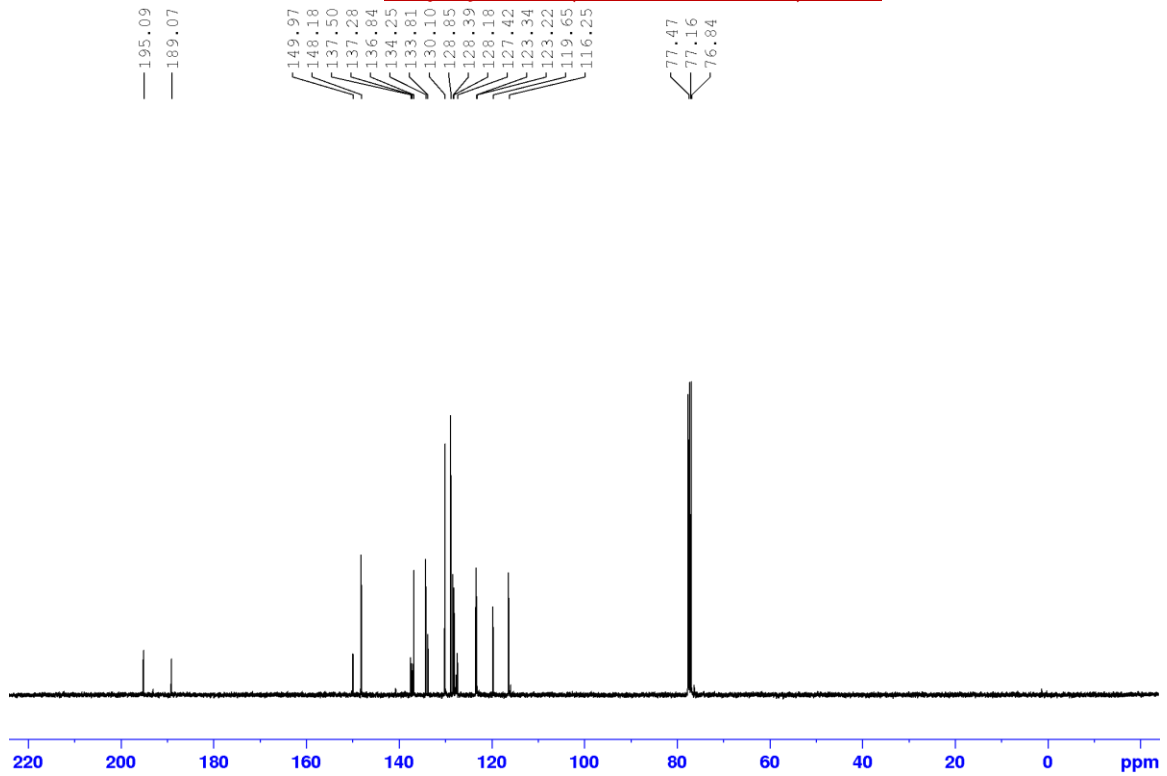

# HRMS of 5f

## Elemental Composition Report

Page 1

### Single Mass Analysis

Tolerance = 50.0 PPM / DBE: min = -1.5, max = 50.0

Element prediction: Off

Number of isotope peaks used for i-FIT = 3

Monoisotopic Mass, Even Electron Ions

16 formula(e) evaluated with 1 results within limits (up to 3 closest results for each mass)

Elements Used:

C: 0-20 H: 0-100 N: 0-3 O: 0-2

SM-387

QMI DIVISION, CSIR-IIIM JAMMU  
Xevo G2-XS QTOF YFC2015

30-Apr-2024

11:50:17

1: TOF MS ES+

2.32e+007

300424\_06 7 (0.155)

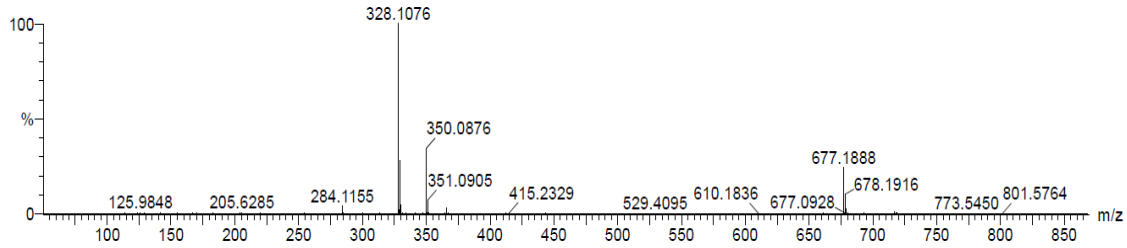

Minimum: -1.5  
Maximum: 2.0 50.0 50.0

| Mass     | Calc. Mass | mDa  | PPM  | DBE  | i-FIT  | Norm | Conf(%) | Formula       |
|----------|------------|------|------|------|--------|------|---------|---------------|
| 328.1076 | 328.1086   | -1.0 | -3.0 | 15.5 | 1253.3 | n/a  | n/a     | C20 H14 N3 O2 |

### <sup>1</sup>H NMR (400 MHz, CDCl<sub>3</sub>) of 5g

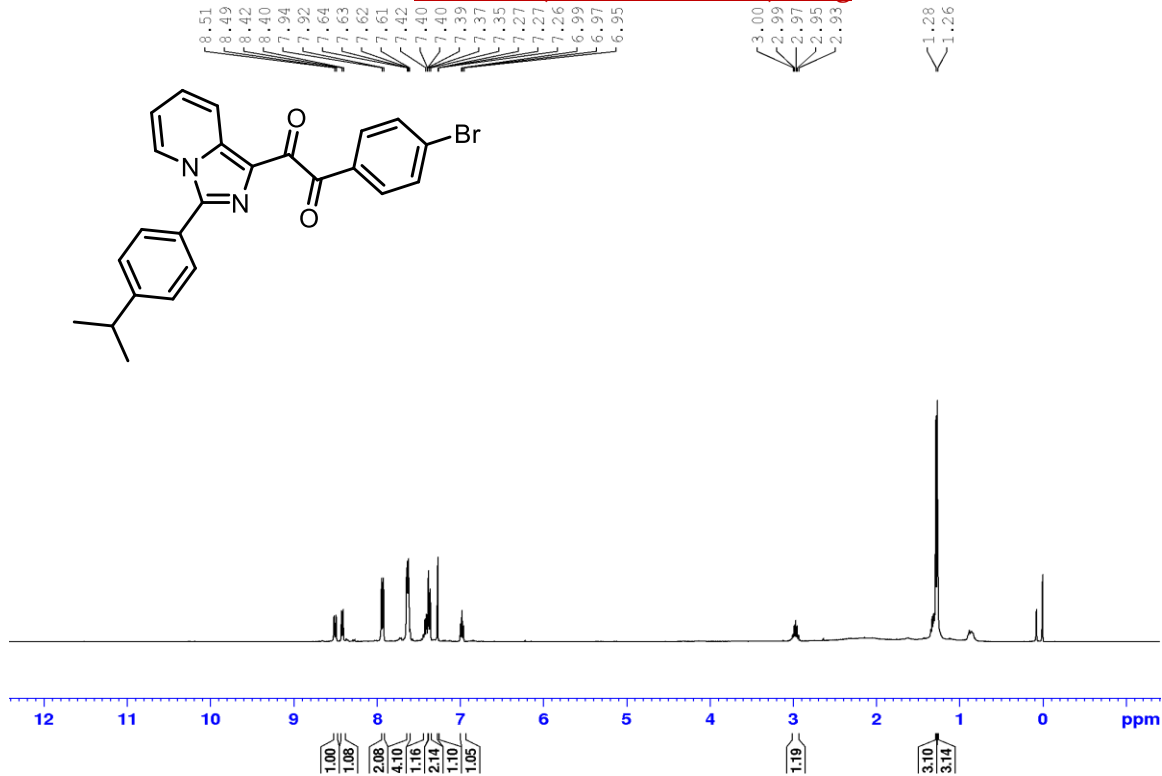

### <sup>13</sup>C{<sup>1</sup>H} NMR (101 MHz, CDCl<sub>3</sub>) of 5g

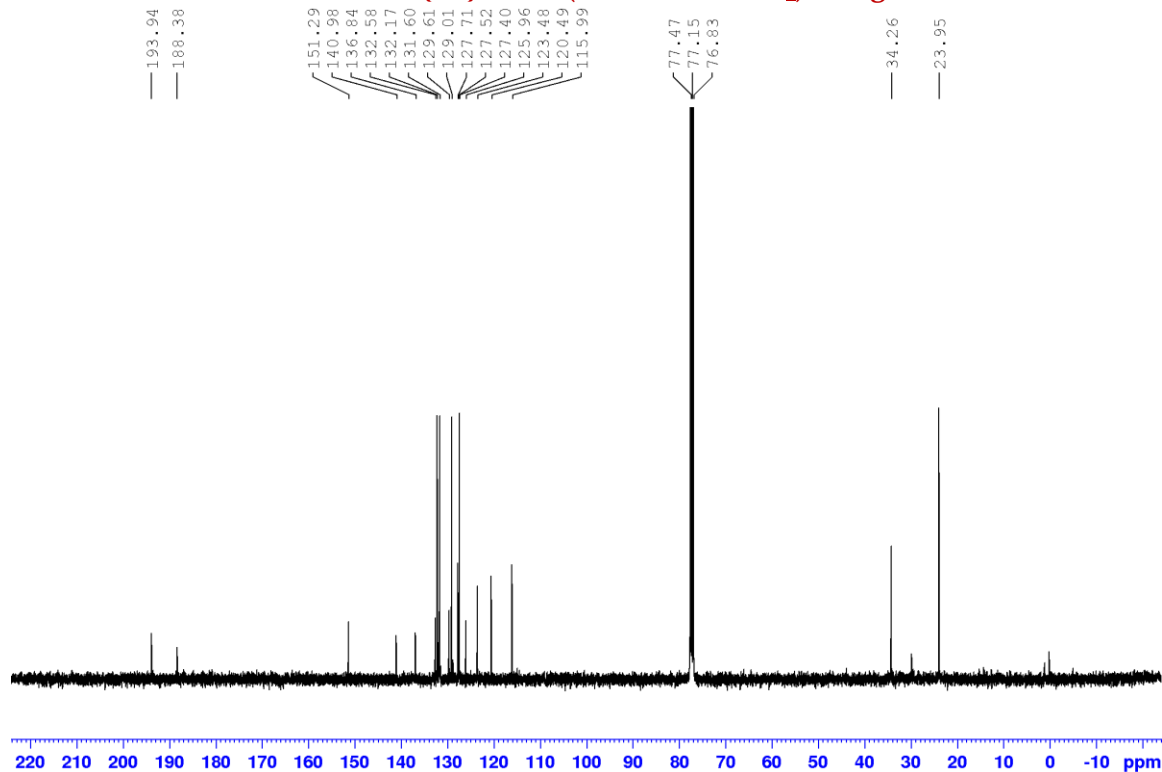

### HRMS of 5g

#### Elemental Composition Report

Page 1

#### Single Mass Analysis

Tolerance = 50.0 PPM / DBE: min = -1.5, max = 50.0

Element prediction: Off

Number of isotope peaks used for i-FIT = 3

Monoisotopic Mass, Even Electron Ions

22 formula(e) evaluated with 1 results within limits (up to 3 closest results for each mass)

Elements Used:

C: 0-24 H: 0-100 N: 0-2 O: 0-2 Br: 0-1

SM-439

QMI DIVISION, CSIR-IIIM JAMMU  
Xevo G2-XS QTOF YFC2015

30-Apr-2024

11:55:25

300424\_08 5 (0.121)

1: TOF MS ES+  
1.44e+007

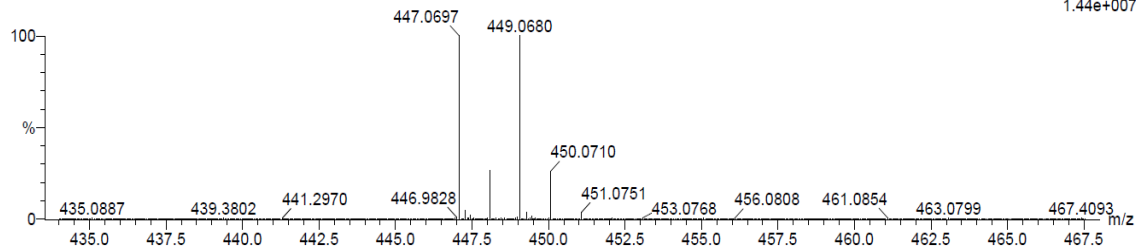

Minimum: -1.5  
Maximum: 2.0 50.0 50.0

| Mass     | Calc. Mass | mDa  | PPM  | DBE  | i-FIT | Norm | Conf (%) | Formula                                                          |
|----------|------------|------|------|------|-------|------|----------|------------------------------------------------------------------|
| 447.0697 | 447.0708   | -1.1 | -2.5 | 15.5 | 997.6 | n/a  | n/a      | C <sub>24</sub> H <sub>20</sub> N <sub>2</sub> O <sub>2</sub> Br |

**<sup>1</sup>H NMR (400 MHz, CDCl<sub>3</sub>) of 5h**

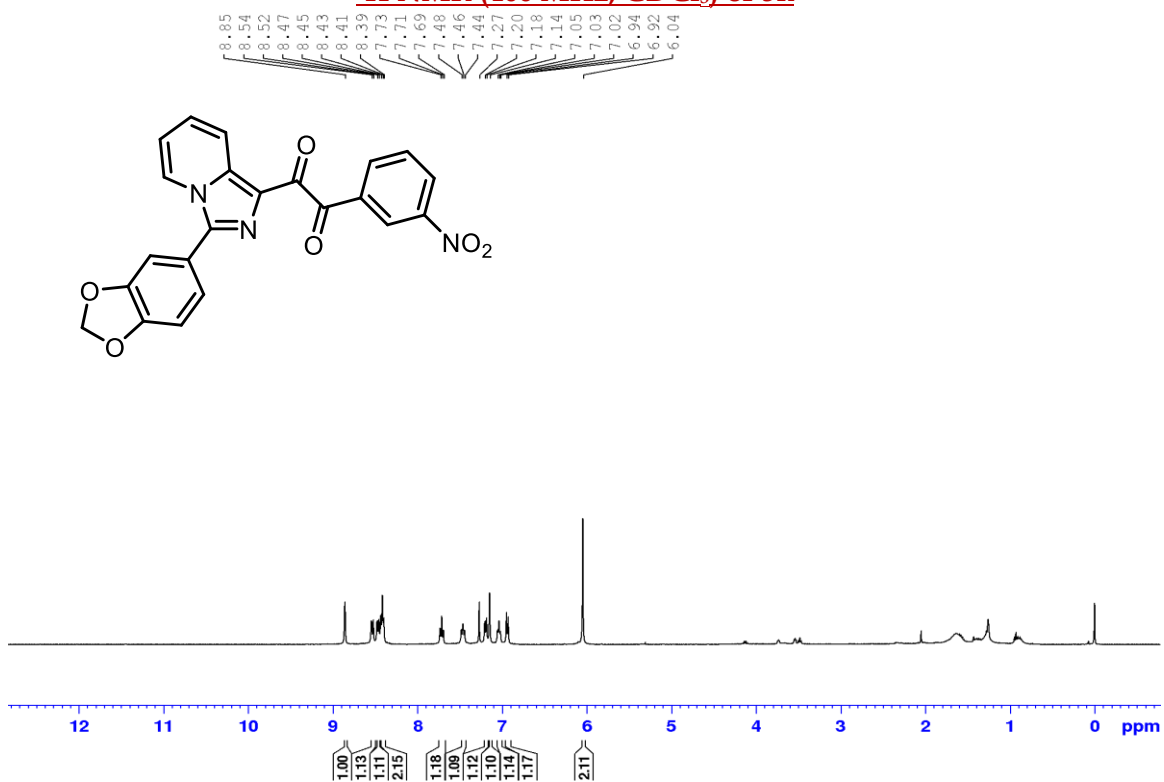

**<sup>13</sup>C[<sup>1</sup>H] NMR (101 MHz, CDCl<sub>3</sub>) of 5h**

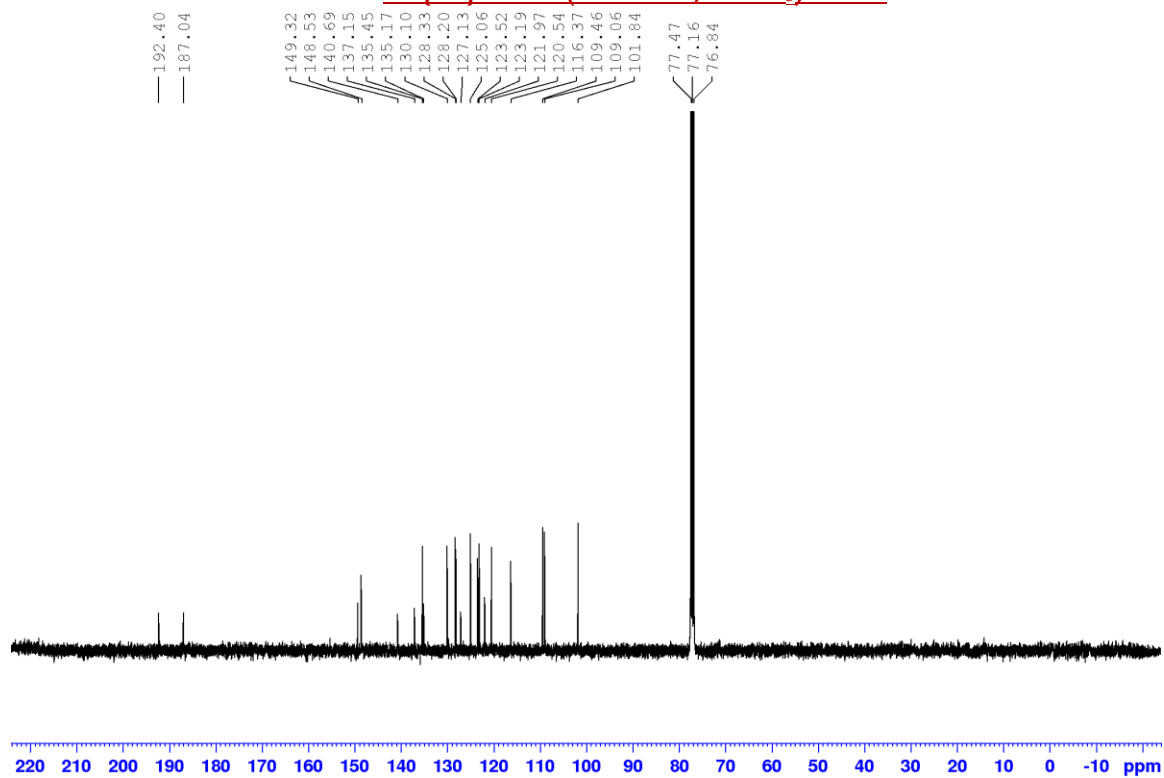

# HRMS of 5h

## Elemental Composition Report

### Single Mass Analysis

Tolerance = 50.0 PPM / DBE: min = -1.5, max = 50.0

Element prediction: Off

Number of isotope peaks used for i-FIT = 3

Monoisotopic Mass, Even Electron Ions

37 formula(e) evaluated with 1 results within limits (up to 3 closest results for each mass)

Elements Used:

C: 0-22 H: 0-150 N: 0-3 O: 0-6

SM-515

QMI DIVISION, CSIR-IIIM JAMMU  
Xevo G2-XS QTOF YFC2015

02-May-2024

13:09:40

1: TOF MS ES+

5.10e+006

020524\_25 8 (0.172) Cm (8)

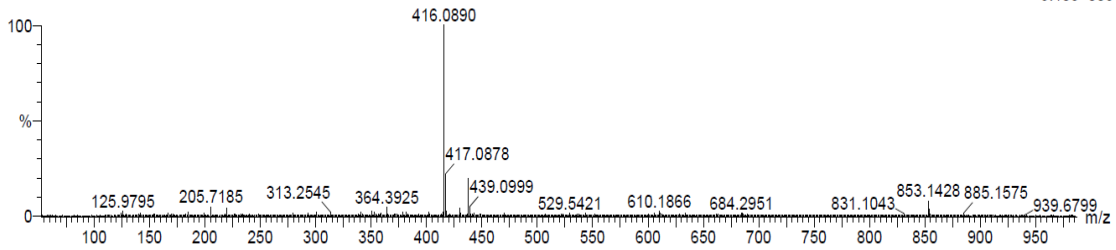

Minimum: -1.5  
Maximum: 2.0 50.0 50.0

| Mass     | Calc. Mass | mDa | PPM | DBE  | i-FIT | Norm | Conf(%) | Formula       |
|----------|------------|-----|-----|------|-------|------|---------|---------------|
| 416.0890 | 416.0883   | 0.7 | 1.7 | 17.5 | 37.8  | n/a  | n/a     | C22 H14 N3 O6 |

### <sup>1</sup>H NMR (400 MHz, CDCl<sub>3</sub>) of 5i

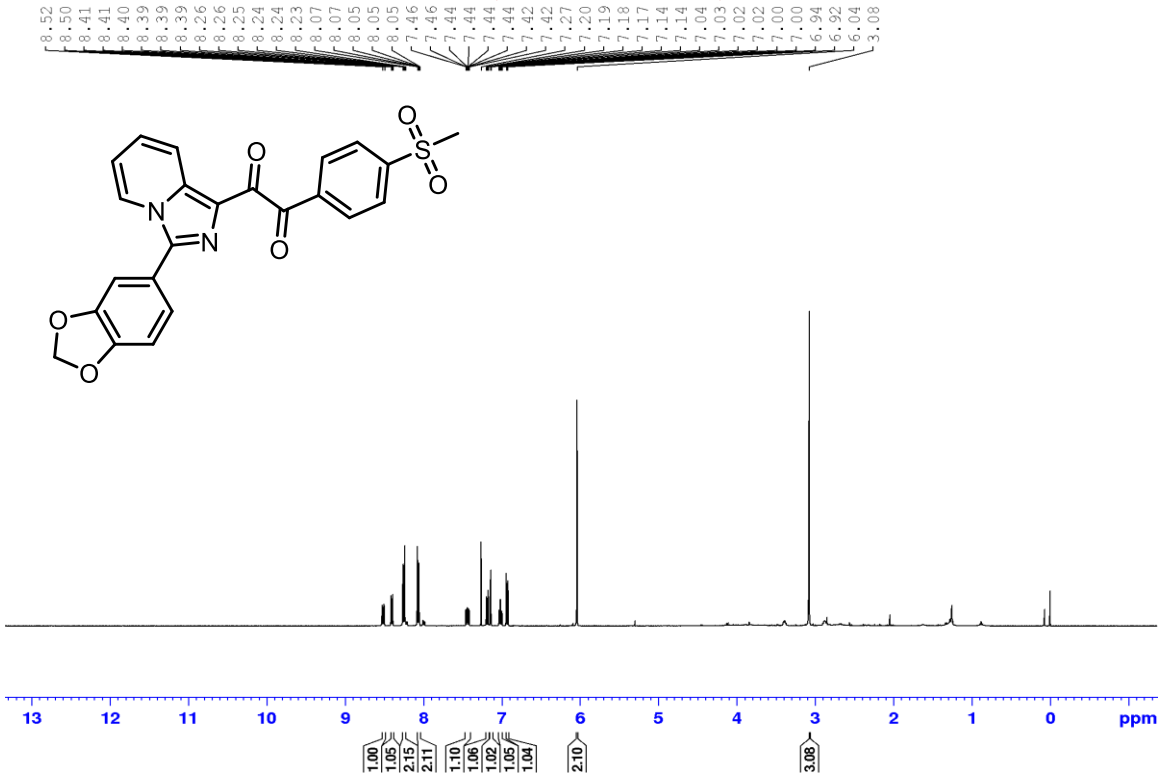

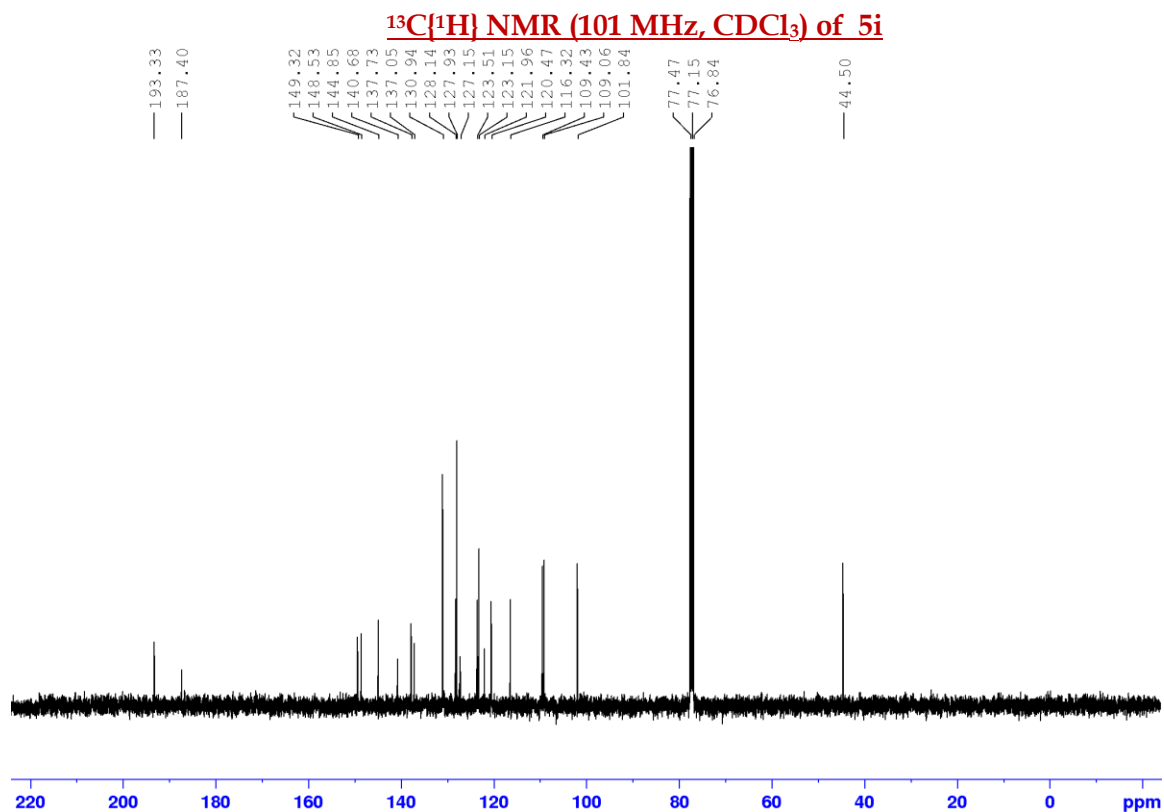

**HRMS of 5i**

**Elemental Composition Report**

Page 1

**Single Mass Analysis**

Tolerance = 50.0 PPM / DBE: min = -1.5, max = 50.0

Element prediction: Off

Number of isotope peaks used for i-FIT = 3

Monoisotopic Mass, Even Electron Ions

48 formula(e) evaluated with 1 results within limits (up to 3 closest results for each mass)

Elements Used:

C: 0-23 H: 0-100 N: 0-2 O: 0-6 S: 0-1

SM-527

QMI DIVISION, CSIR-IIIM JAMMU  
Xevo G2-XS QTOF YFC2015

07-May-2024

14:47:00

1: TOF MS ES+

4.06e+006

070524\_42 5 (0.121)

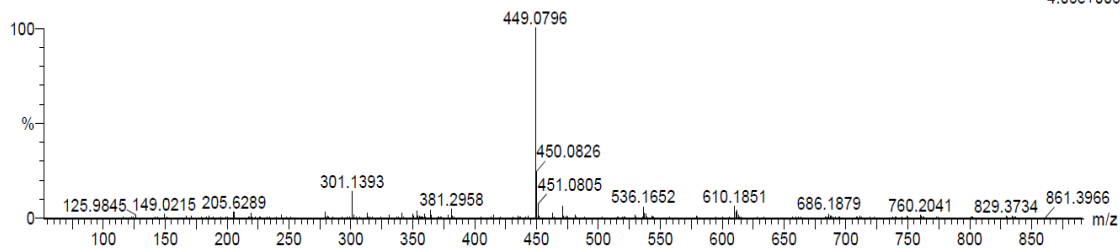

Minimum: -1.5  
Maximum: 2.0 50.0 50.0

| Mass     | Calc. Mass | mDa  | PPM  | DBE  | i-FIT | Norm | Conf(%) | Formula         |
|----------|------------|------|------|------|-------|------|---------|-----------------|
| 449.0796 | 449.0807   | -1.1 | -2.4 | 16.5 | 894.5 | n/a  | n/a     | C23 H17 N2 O6 S |



**<sup>1</sup>H NMR (400 MHz, CDCl<sub>3</sub>) of 5j**

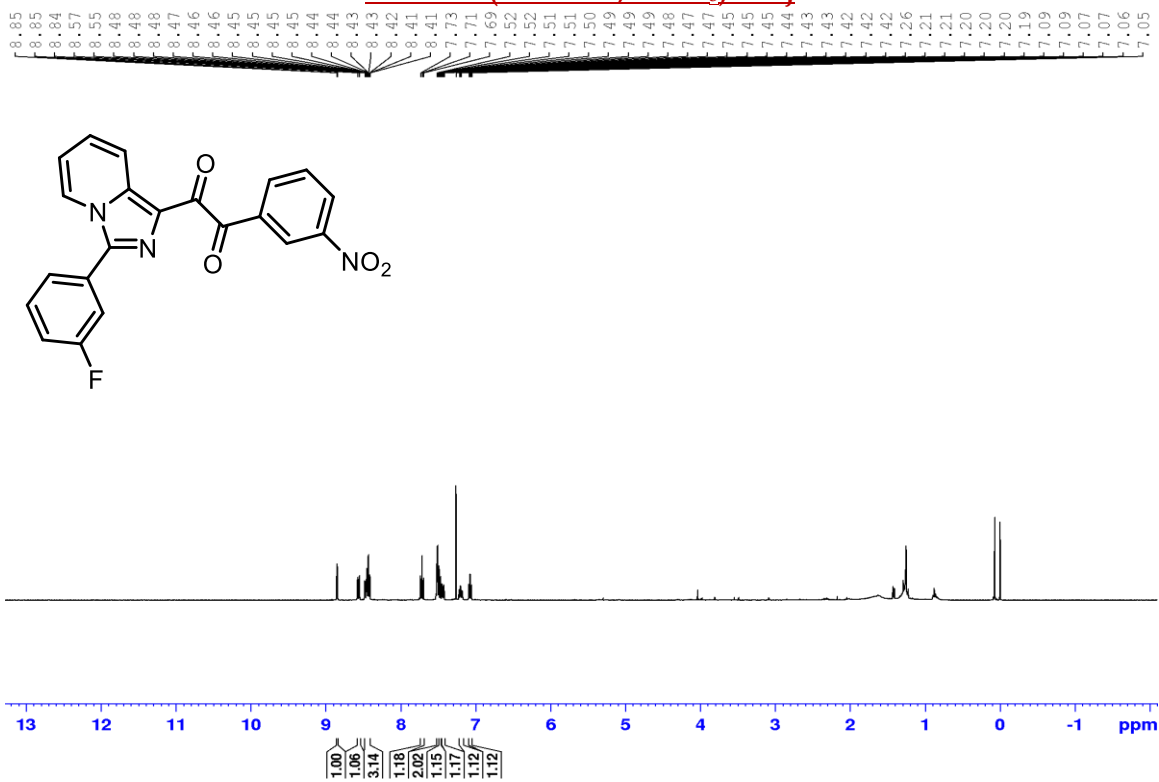

**<sup>13</sup>C[<sup>1</sup>H] NMR (101 MHz, CDCl<sub>3</sub>) of 5j**

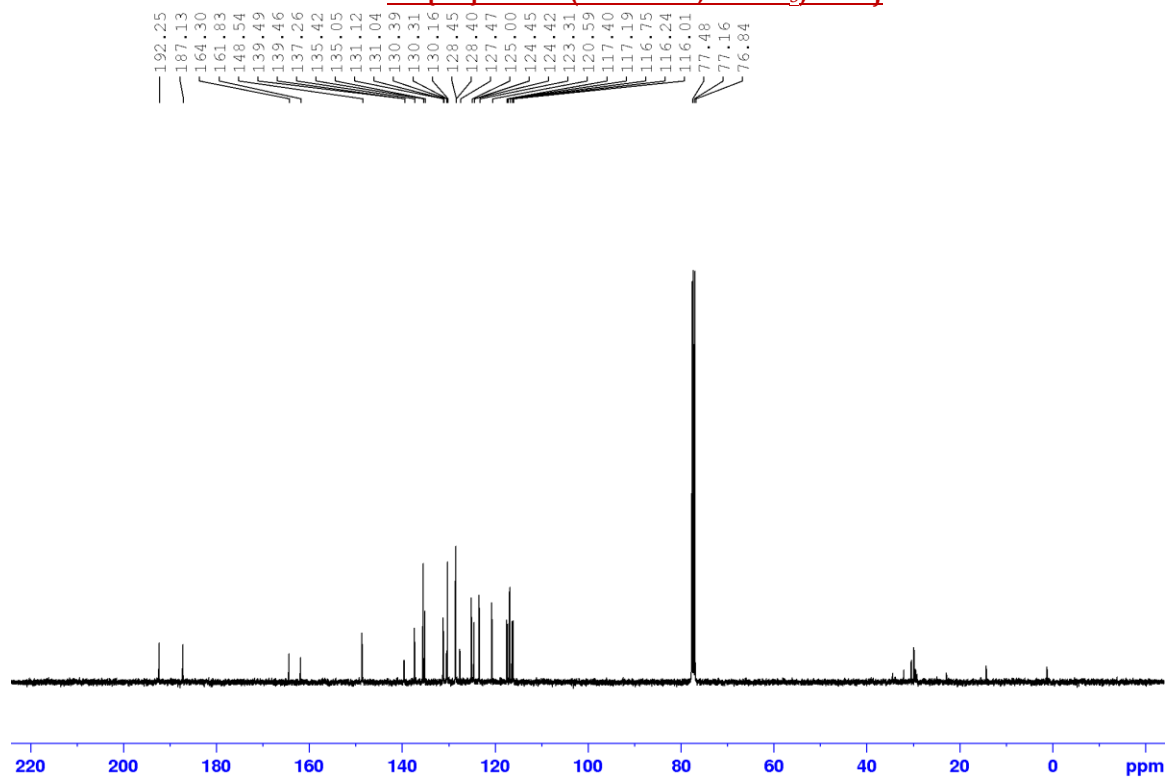

# <sup>19</sup>F NMR (377 MHz, CDCl<sub>3</sub>) of 5j

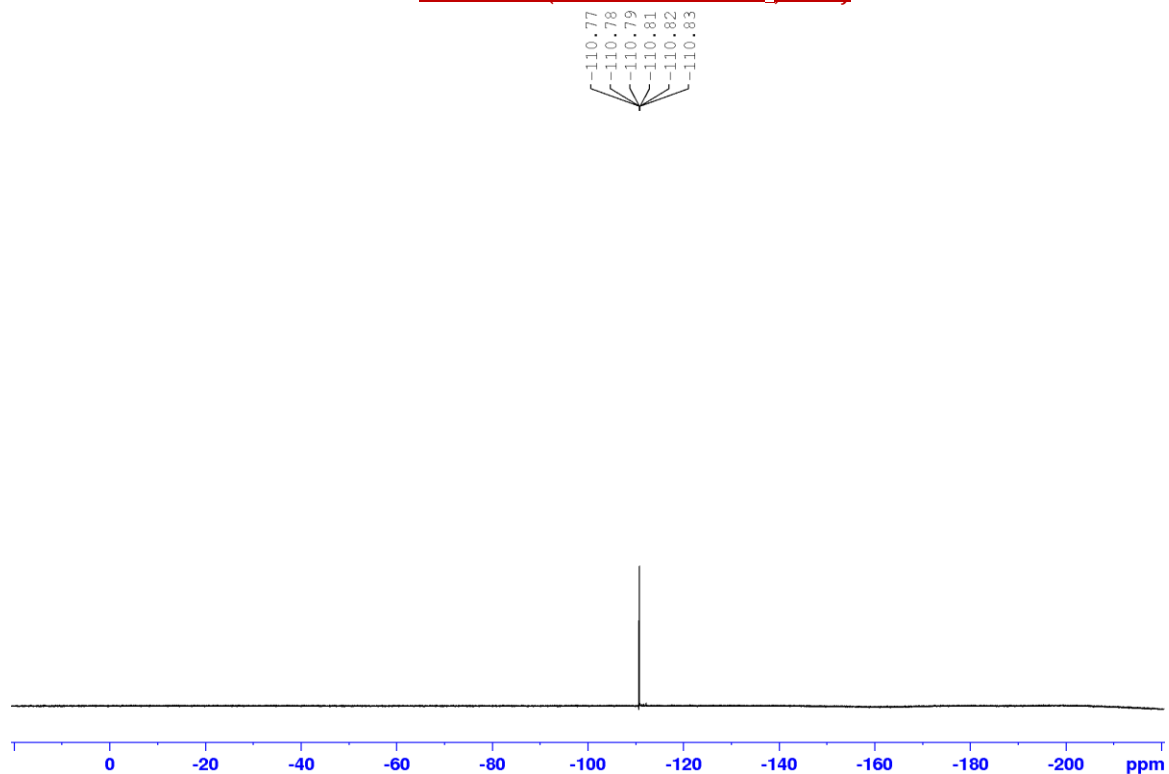

## HRMS of 5j

### Elemental Composition Report

Page 1

#### Single Mass Analysis

Tolerance = 50.0 PPM / DBE: min = -1.5, max = 50.0

Element prediction: Off

Number of isotope peaks used for i-FIT = 3

Monoisotopic Mass, Even Electron Ions

47 formula(e) evaluated with 1 results within limits (up to 3 closest results for each mass)

Elements Used:

C: 0-21 H: 0-100 N: 0-3 O: 0-4 F: 0-1

SM-516

QMI DIVISION, CSIR-IIIM JAMMU  
Xevo G2-XS QTOF YFC2015

07-May-2024

14:36:27

1: TOF MS ES+

2.45e+006

070524\_38 8 (0.172) Cm (8)

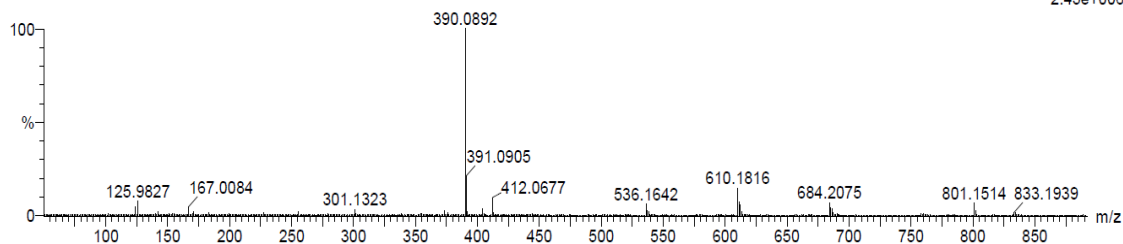

Minimum: -1.5  
Maximum: 2.0 50.0 50.0

| Mass     | Calc. Mass | mDa | PPM | DBE  | i-FIT | Norm | Conf (%) | Formula         |
|----------|------------|-----|-----|------|-------|------|----------|-----------------|
| 390.0892 | 390.0890   | 0.2 | 0.5 | 16.5 | 38.4  | n/a  | n/a      | C21 H13 N3 O4 F |

**<sup>1</sup>H NMR (400 MHz, CDCl<sub>3</sub>) of 5k**

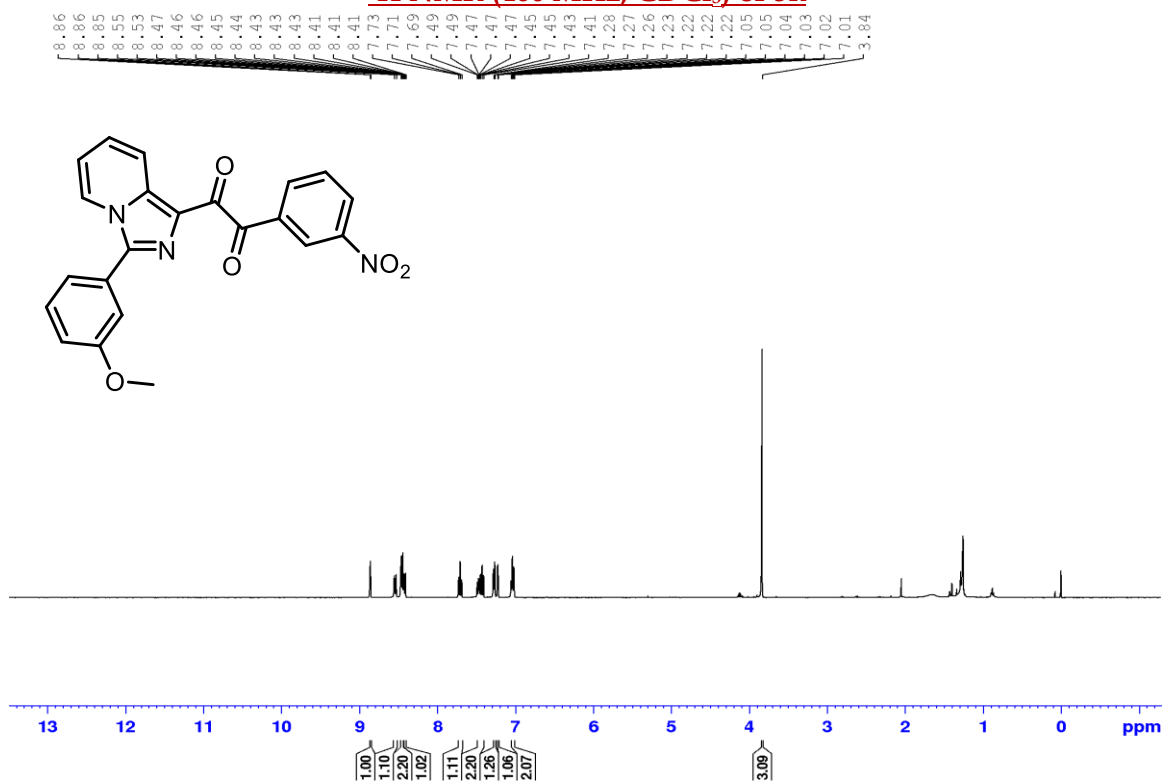

**<sup>13</sup>C{<sup>1</sup>H} NMR (101 MHz, CDCl<sub>3</sub>) of 5k**

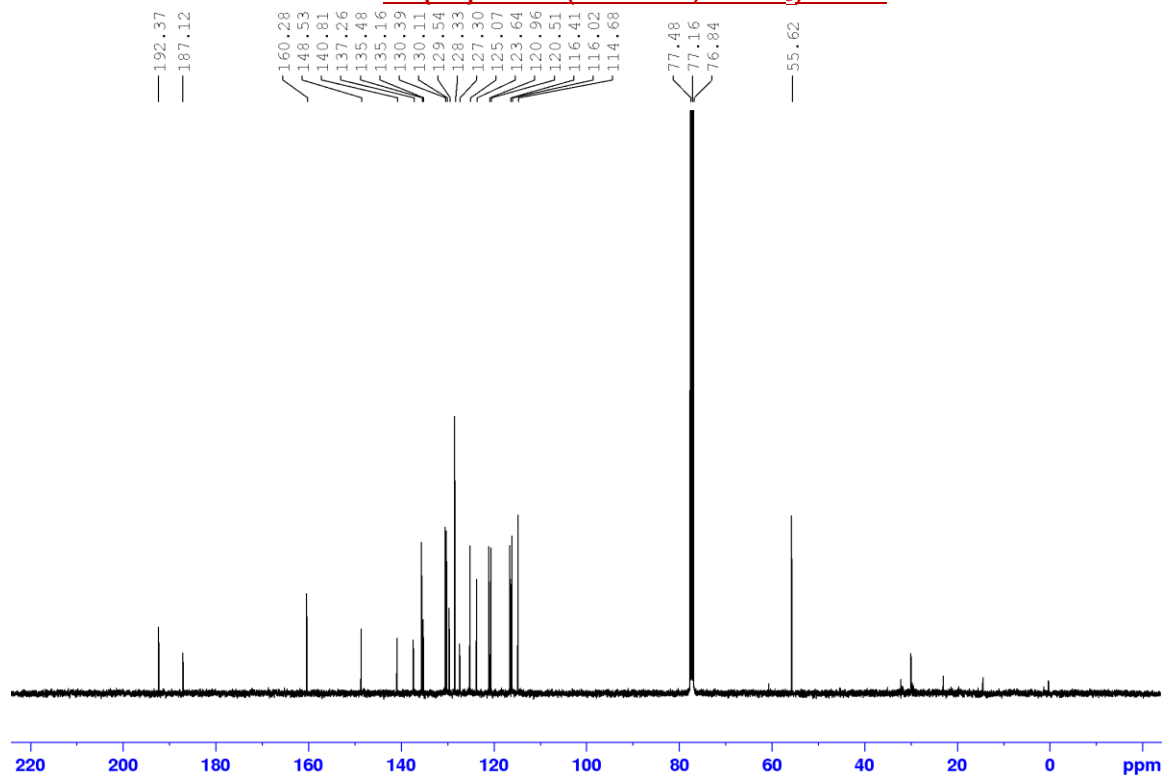

## HRMS of 5k

### Elemental Composition Report

Page 1

#### Single Mass Analysis

Tolerance = 50.0 PPM / DBE: min = -1.5, max = 50.0

Element prediction: Off

Number of isotope peaks used for i-FIT = 3

Monoisotopic Mass, Even Electron Ions

30 formula(e) evaluated with 1 results within limits (up to 3 closest results for each mass)

Elements Used:

C: 0-22 H: 0-100 N: 0-3 O: 0-5

SM-514

QMI DIVISION, CSIR-IIIM JAMMU  
Xevo G2-XS QTOF YFC2015

02-May-2024

11:50:21

1: TOF MS ES+  
6.87e+005

020524\_06 5 (0.121)

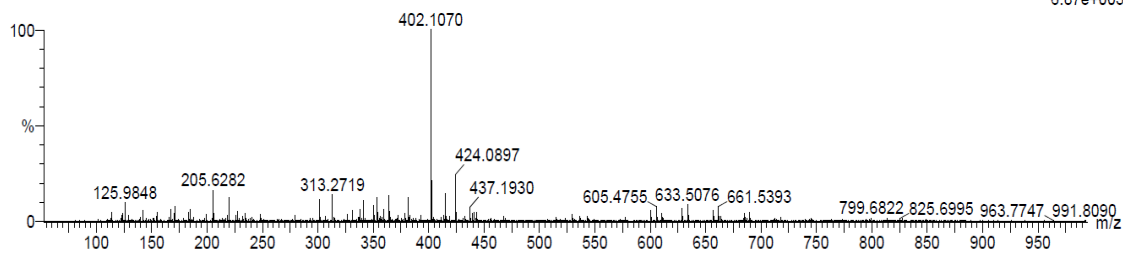

Minimum: -1.5  
Maximum: 2.0 50.0 50.0

| Mass     | Calc. Mass | mDa  | PPM  | DBE  | i-FIT  | Norm | Conf(%) | Formula       |
|----------|------------|------|------|------|--------|------|---------|---------------|
| 402.1070 | 402.1090   | -2.0 | -5.0 | 16.5 | 1043.6 | n/a  | n/a     | C22 H16 N3 O5 |

### <sup>1</sup>H NMR (400 MHz, CDCl<sub>3</sub>) of 5l

8.45, 8.43, 8.41, 8.39, 7.69, 7.66, 7.64, 7.37, 7.35, 7.35, 7.35, 7.26, 6.96, 6.95, 6.93, 6.57, 6.57, 6.57, 6.56, 2.99, 2.96, 2.94, 2.93, 1.28, 1.26

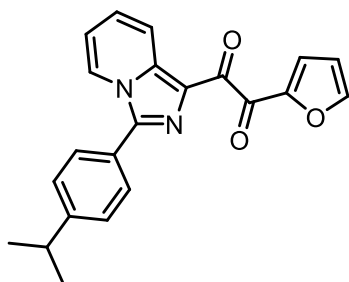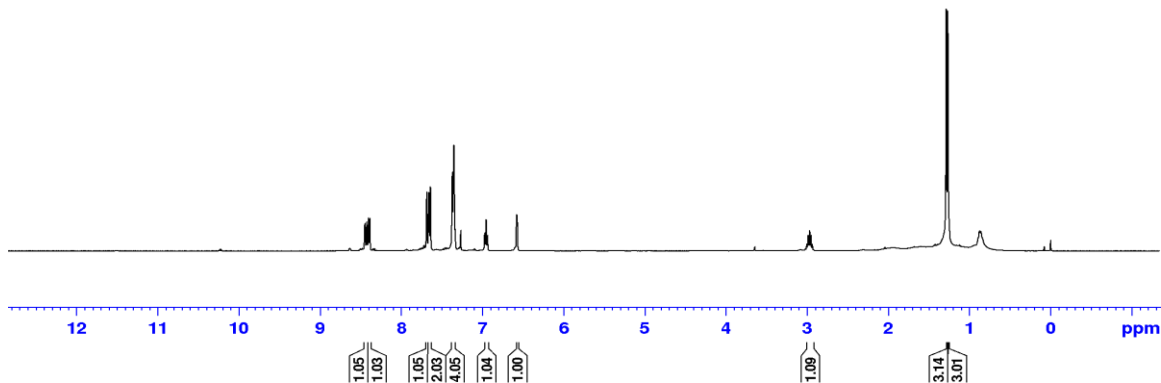

### <sup>13</sup>C{<sup>1</sup>H} NMR (101 MHz, CDCl<sub>3</sub>) of 51

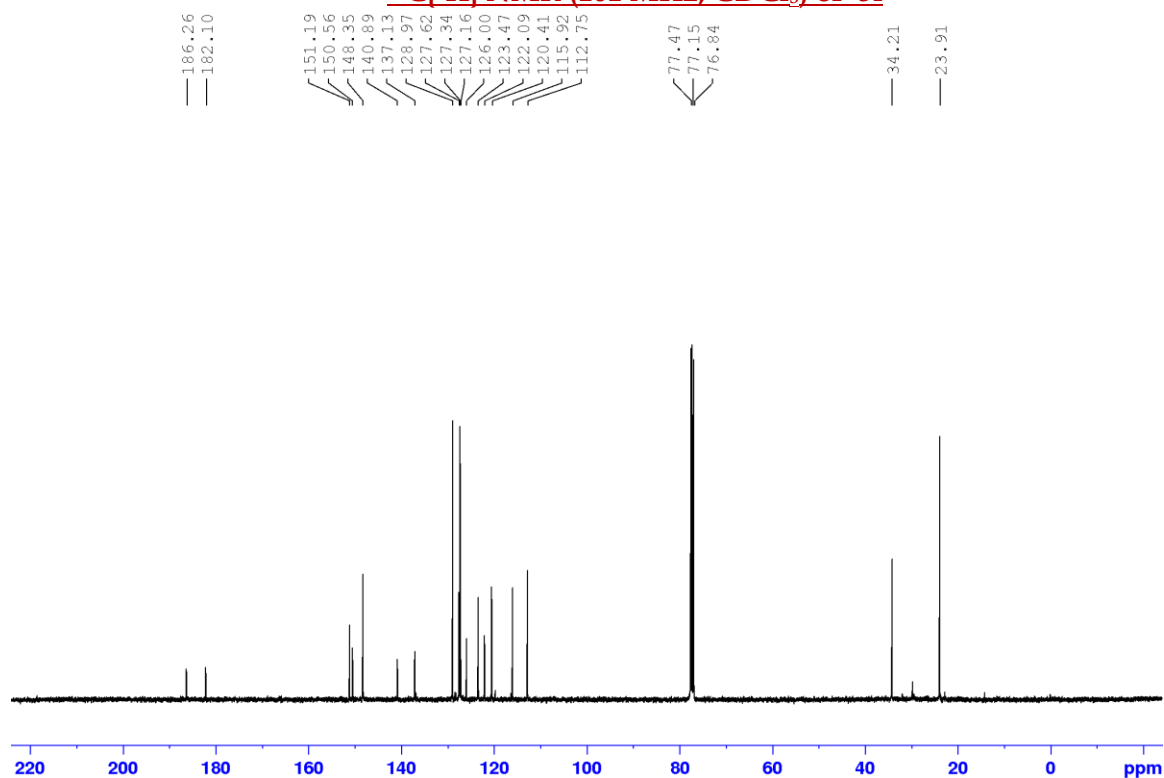

### HRMS of 51

#### Elemental Composition Report

Page 1

#### Single Mass Analysis

Tolerance = 50.0 PPM / DBE: min = -1.5, max = 50.0

Element prediction: Off

Number of isotope peaks used for i-FIT = 3

Monoisotopic Mass, Even Electron Ions

16 formula(e) evaluated with 1 results within limits (up to 3 closest results for each mass)

Elements Used:

C: 0-22 H: 0-100 N: 0-2 O: 0-3

SM-440

QMI DIVISION, CSIR-IIIM JAMMU  
Xevo G2-XS QTOF YFC2015

30-Apr-2024

11:40:02

1: TOF MS ES+

2.30e+007

300424\_02.7 (0.155)

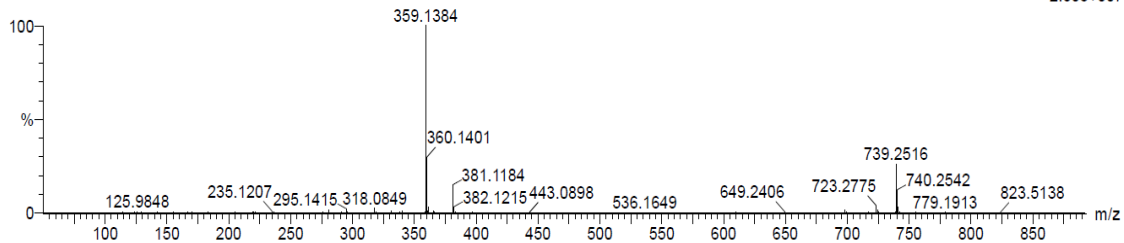

Minimum: -1.5  
Maximum: 2.0 50.0 50.0

| Mass     | Calc. Mass | mDa  | PPM  | DBE  | i-FIT  | Norm | Conf (%) | Formula       |
|----------|------------|------|------|------|--------|------|----------|---------------|
| 359.1384 | 359.1396   | -1.2 | -3.3 | 14.5 | 1132.6 | n/a  | n/a      | C22 H19 N2 O3 |

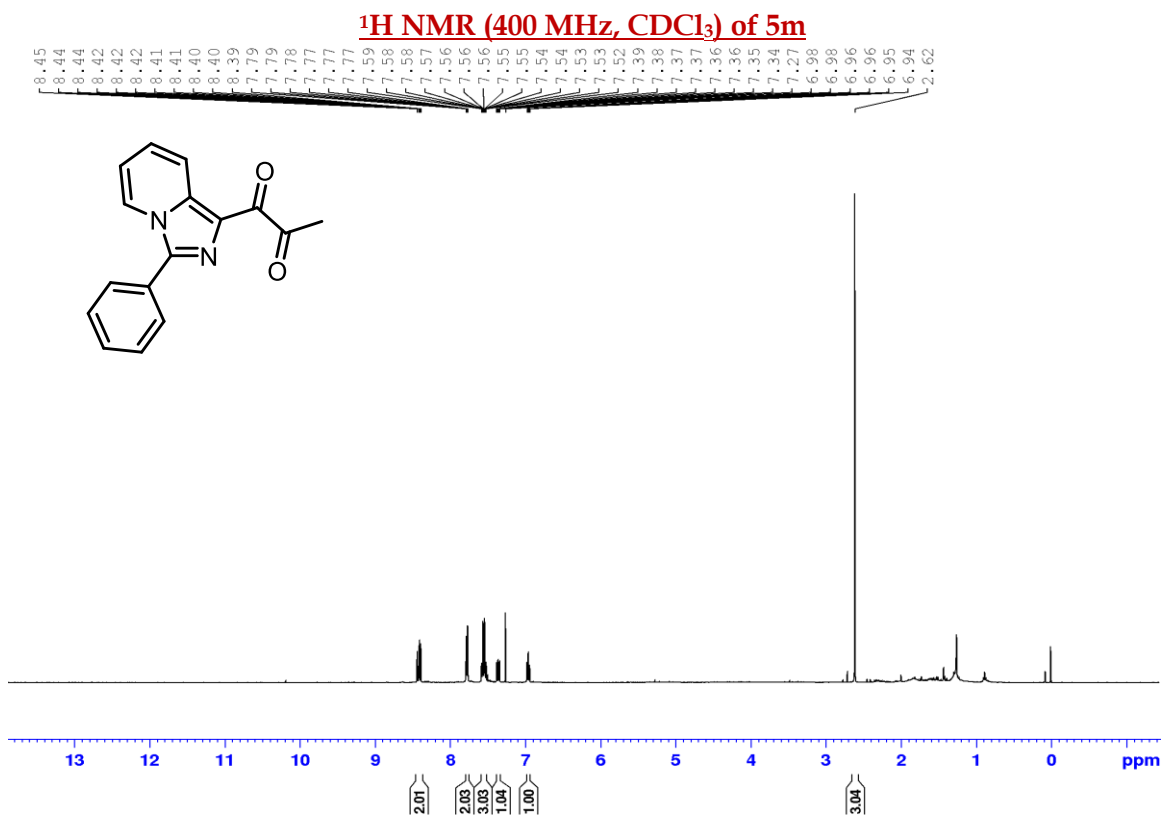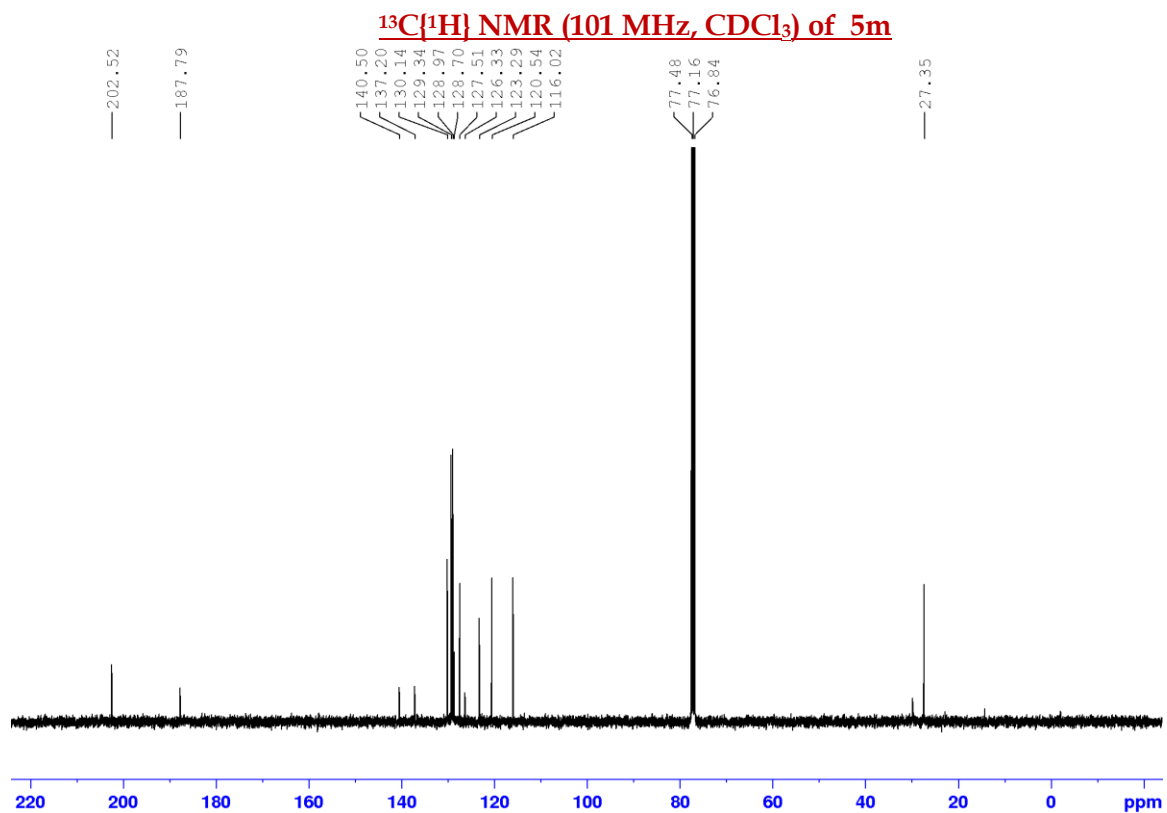

# HRMS of 5m

## Elemental Composition Report

Page 1

### Single Mass Analysis

Tolerance = 50.0 PPM / DBE: min = -1.5, max = 50.0

Element prediction: Off

Number of isotope peaks used for i-FIT = 3

Monoisotopic Mass, Even Electron Ions

13 formula(e) evaluated with 1 results within limits (up to 3 closest results for each mass)

Elements Used:

C: 0-16 H: 0-100 N: 0-2 O: 0-2

SM-522

QMI DIVISION, CSIR-IIIM JAMMU  
Xevo G2-XS QTOF YFC2015

02-May-2024

13:21:09

1: TOF MS ES+

5.30e+006

020524\_29 8 (0.172) Cm (8)

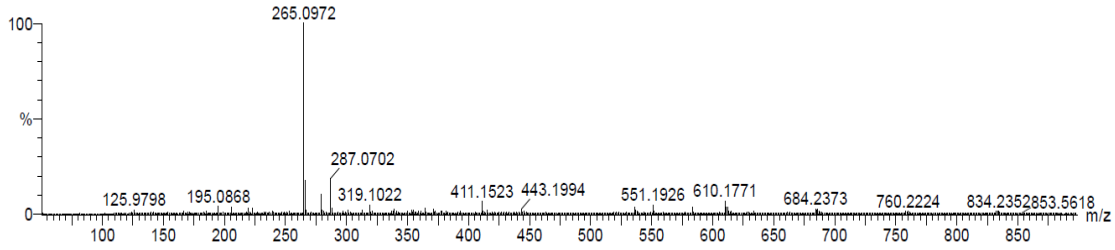

Minimum: -1.5  
Maximum: 2.0 50.0 50.0

| Mass     | Calc. Mass | mDa  | PPM  | DBE  | i-FIT | Norm | Conf(%) | Formula       |
|----------|------------|------|------|------|-------|------|---------|---------------|
| 265.0972 | 265.0977   | -0.5 | -1.9 | 11.5 | 48.5  | n/a  | n/a     | C16 H13 N2 O2 |

### <sup>1</sup>H NMR (400 MHz, CDCl<sub>3</sub>) of 5n

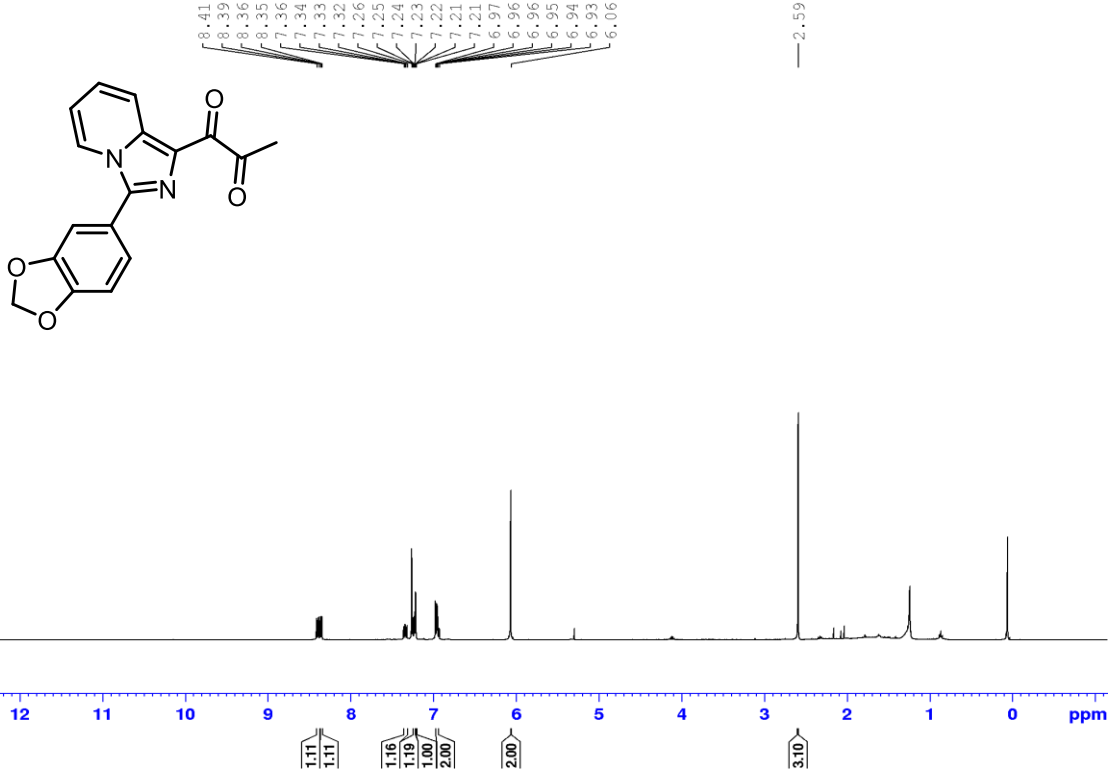

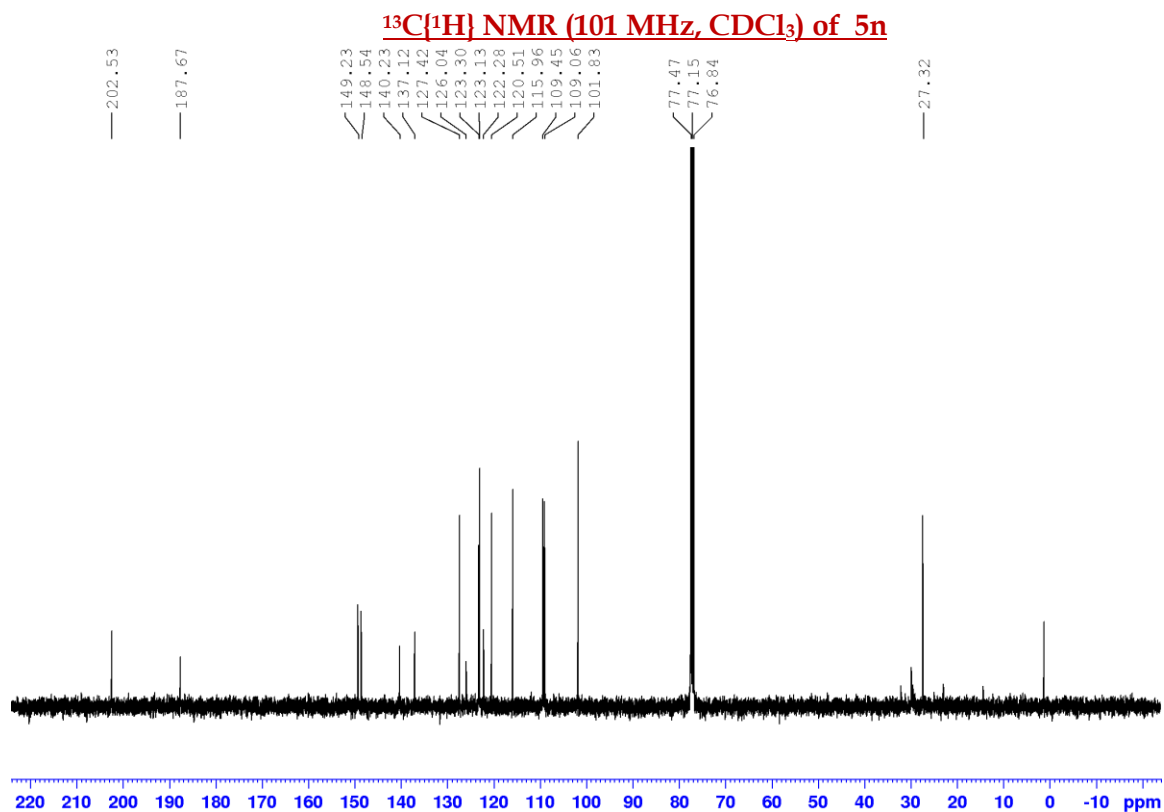

**HRMS of 5n**

**Elemental Composition Report**

Page 1

**Single Mass Analysis**

Tolerance = 50.0 PPM / DBE: min = -1.5, max = 50.0

Element prediction: Off

Number of isotope peaks used for i-FIT = 3

Monoisotopic Mass, Even Electron Ions

19 formula(e) evaluated with 1 results within limits (up to 3 closest results for each mass)

Elements Used:

C: 0-17 H: 0-100 N: 0-2 O: 0-4

SM-470

QMI DIVISION, CSIR-IIIM JAMMU  
Xevo G2-XS QTOF YFC2015

30-Apr-2024

12:03:16

1: TOF MS ES+

1.93e+007

300424\_11 6 (0.138)

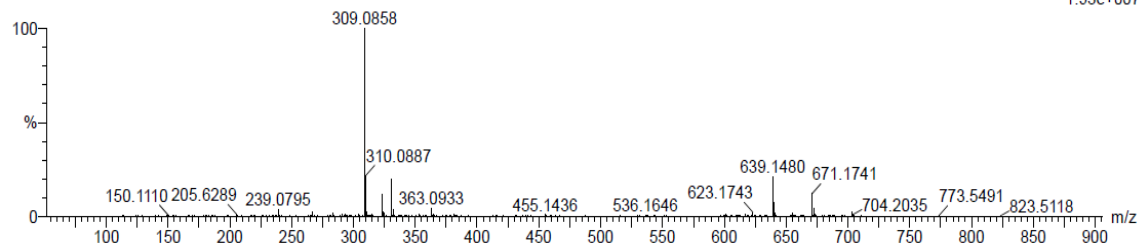

Minimum: -1.5  
Maximum: 2.0 50.0 50.0

| Mass     | Calc. Mass | mDa  | PPM  | DBE  | i-FIT  | Norm | Conf(%) | Formula       |
|----------|------------|------|------|------|--------|------|---------|---------------|
| 309.0858 | 309.0875   | -1.7 | -5.5 | 12.5 | 1203.4 | n/a  | n/a     | C17 H13 N2 O4 |



**$^1\text{H}$  NMR (400 MHz,  $\text{CDCl}_3$ ) of 5o**

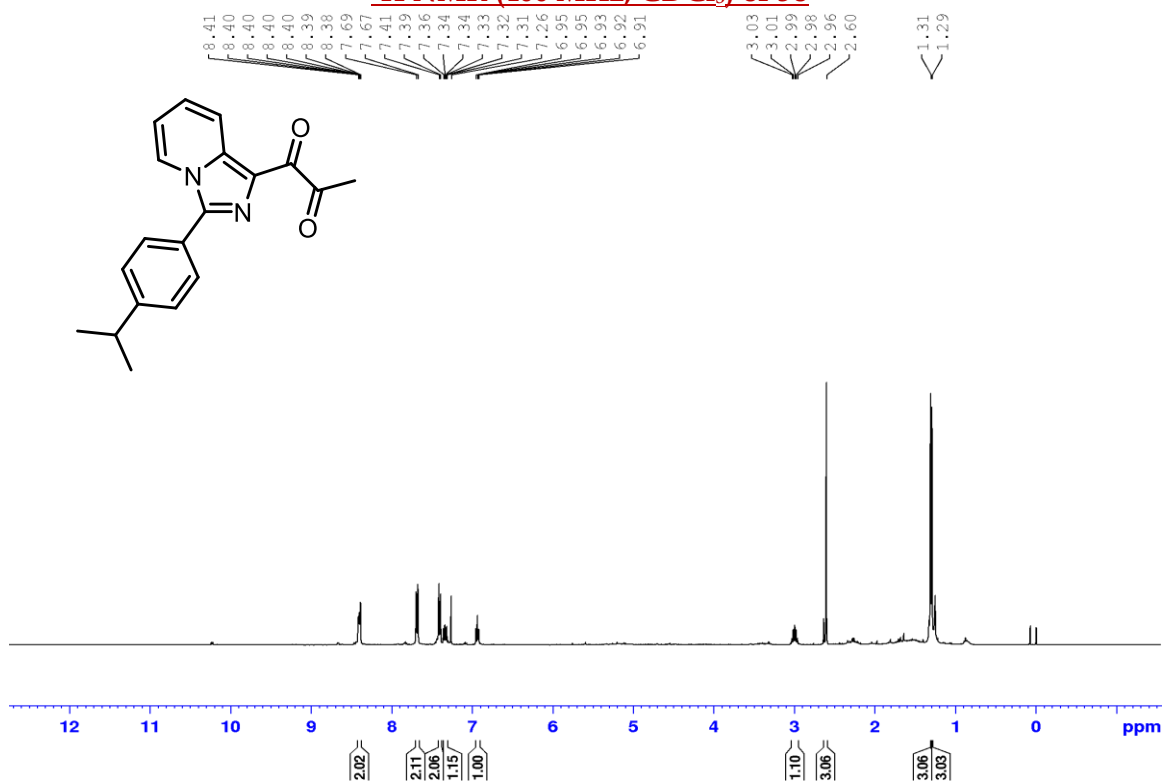

**$^{13}\text{C}$ [ $^1\text{H}$ ] NMR (101 MHz,  $\text{CDCl}_3$ ) of 5o**

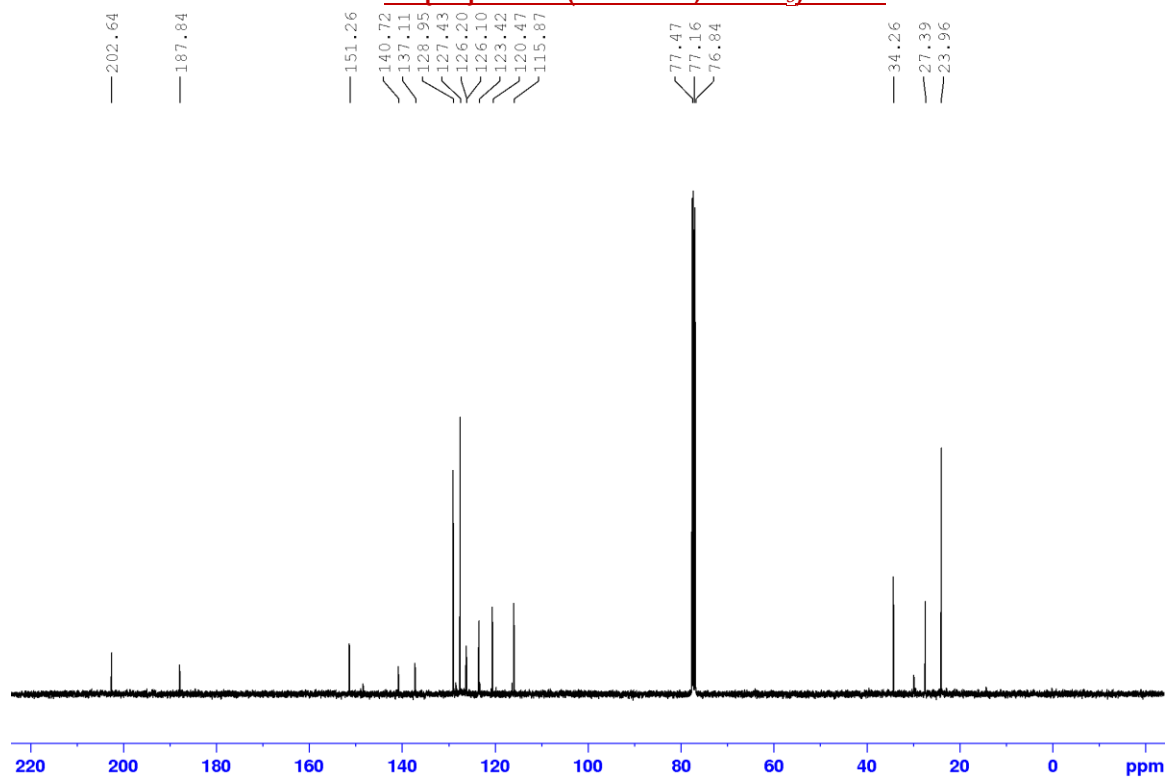

# HRMS of 5o

## Elemental Composition Report

Page 1

### Single Mass Analysis

Tolerance = 50.0 PPM / DBE: min = -1.5, max = 50.0

Element prediction: Off

Number of isotope peaks used for i-FIT = 3

Monoisotopic Mass, Even Electron Ions

13 formula(e) evaluated with 1 results within limits (up to 3 closest results for each mass)

Elements Used:

C: 0-19 H: 0-100 N: 0-2 O: 0-2

SM-428

QMI DIVISION, CSIR-IIIM JAMMU  
Xevo G2-XS QTOF YFC2015

30-Apr-2024

11:47:43

1: TOF MS ES+

4.36e+006

300424\_05 8 (0.172) Cm (8)

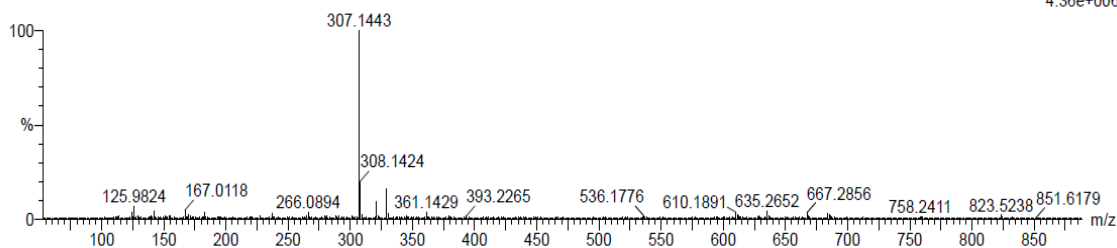

Minimum: -1.5  
Maximum: 2.0 50.0 50.0

| Mass     | Calc. Mass | mDa  | PPM  | DBE  | i-FIT | Norm | Conf(%) | Formula       |
|----------|------------|------|------|------|-------|------|---------|---------------|
| 307.1443 | 307.1447   | -0.4 | -1.3 | 11.5 | 35.9  | n/a  | n/a     | C19 H19 N2 O2 |

### <sup>1</sup>H NMR (400 MHz, CDCl<sub>3</sub>) of 5p

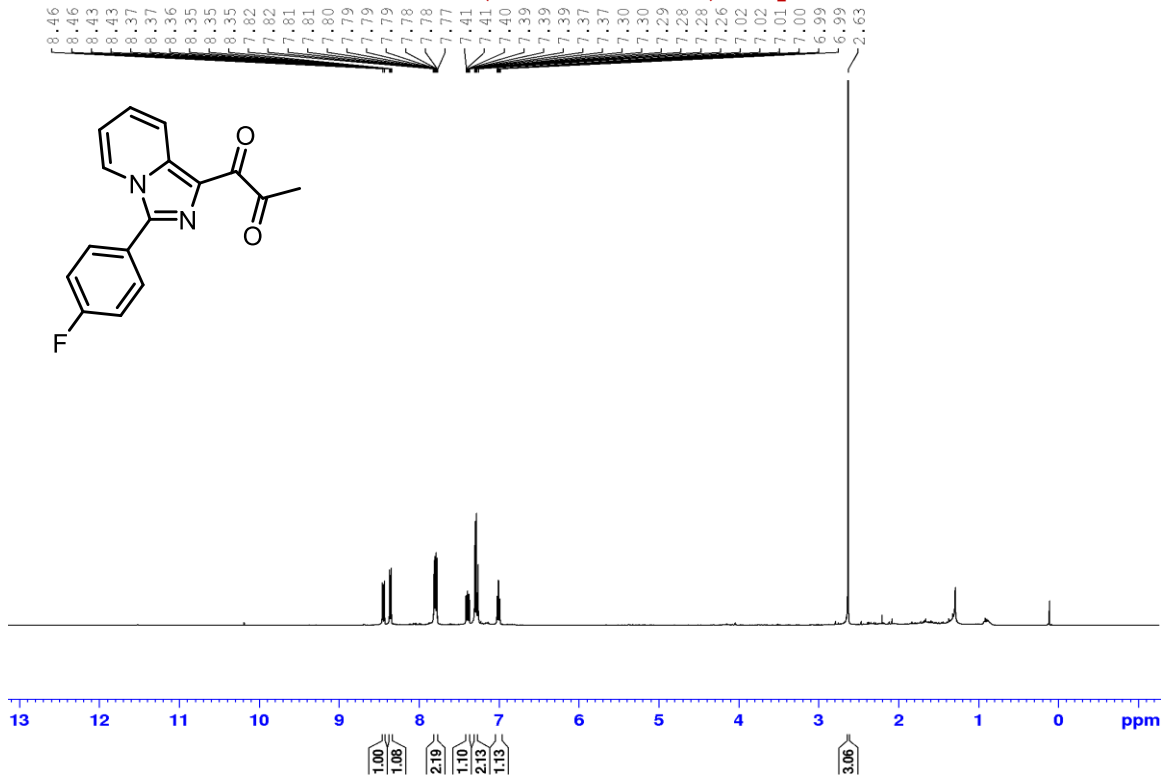

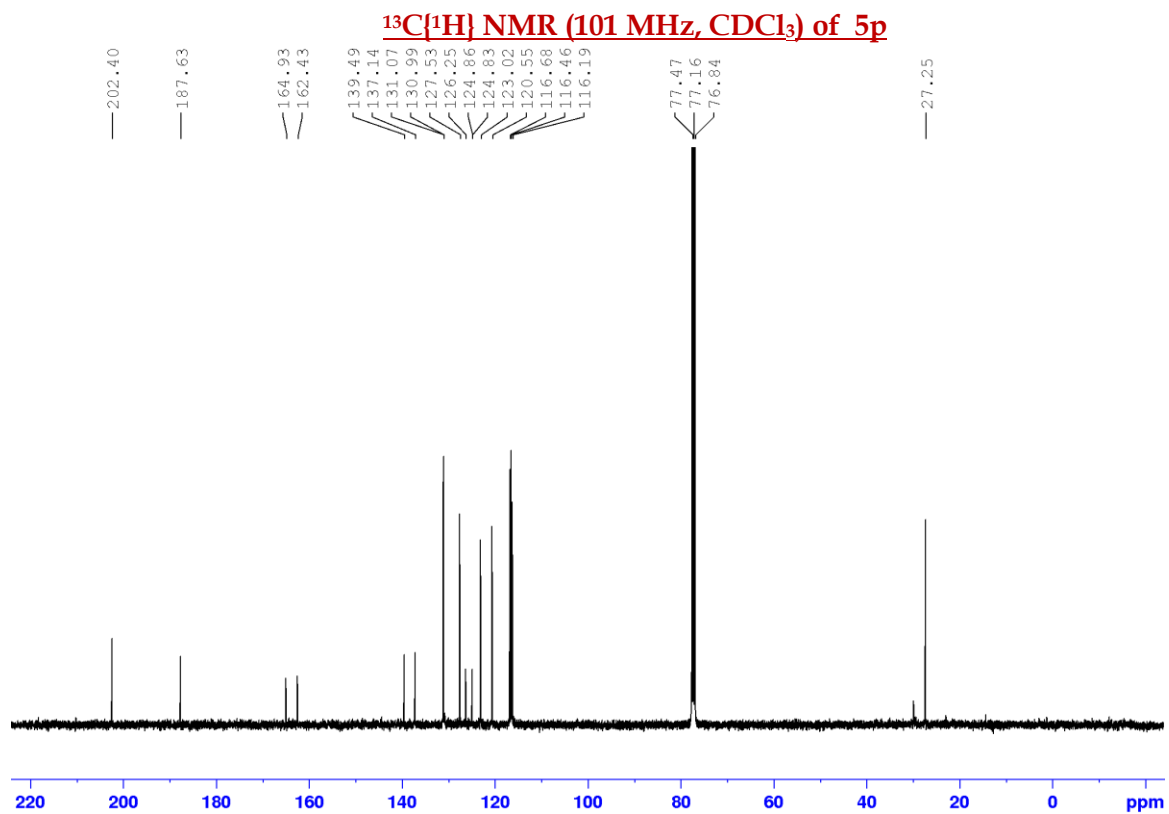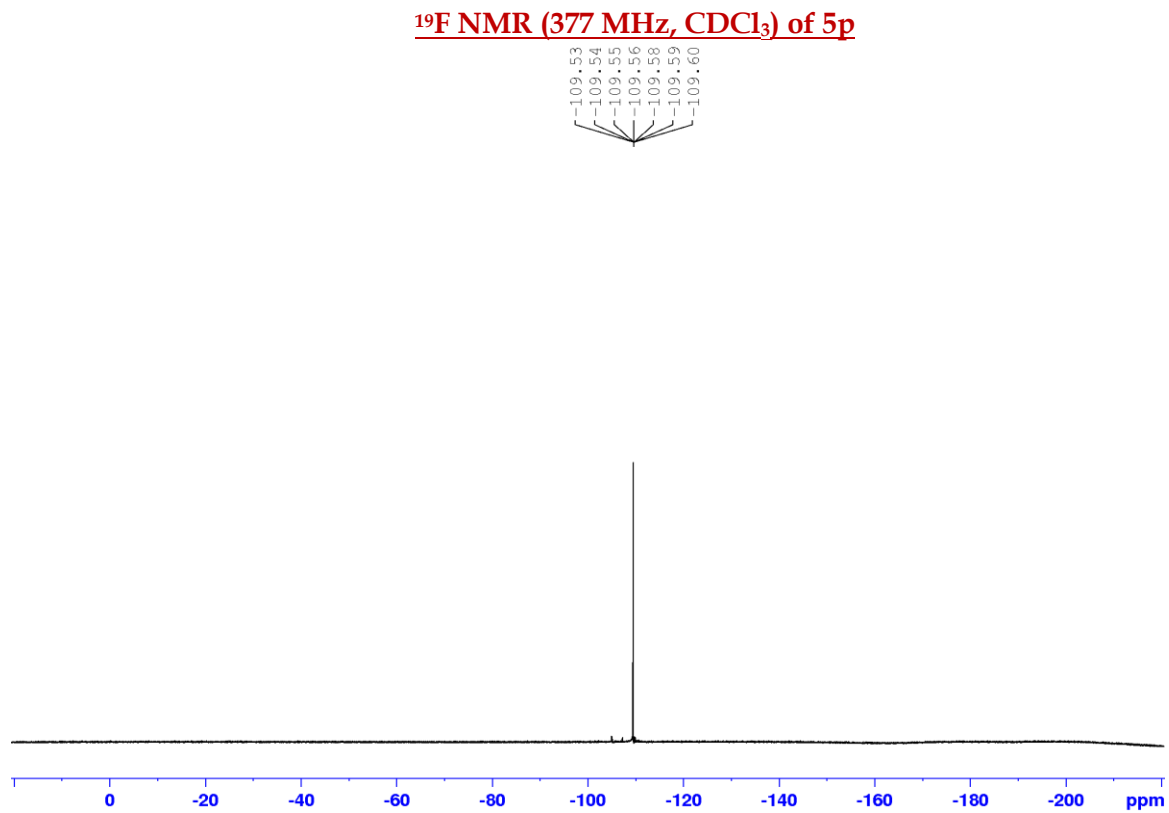

## HRMS of 5p

### Elemental Composition Report

Page 1

#### Single Mass Analysis

Tolerance = 50.0 PPM / DBE: min = -1.5, max = 50.0

Element prediction: Off

Number of isotope peaks used for i-FIT = 3

Monoisotopic Mass, Even Electron Ions

23 formula(e) evaluated with 1 results within limits (up to 3 closest results for each mass)

Elements Used:

C: 0-16 H: 0-100 N: 0-2 O: 0-2 F: 0-1

SM-469

QMI DIVISION, CSIR-IIIM JAMMU  
Xevo G2-XS QTOF YFC2015

30-Apr-2024

11:57:59

1: TOF MS ES+

2.07e+007

300424\_09 5 (0.121)

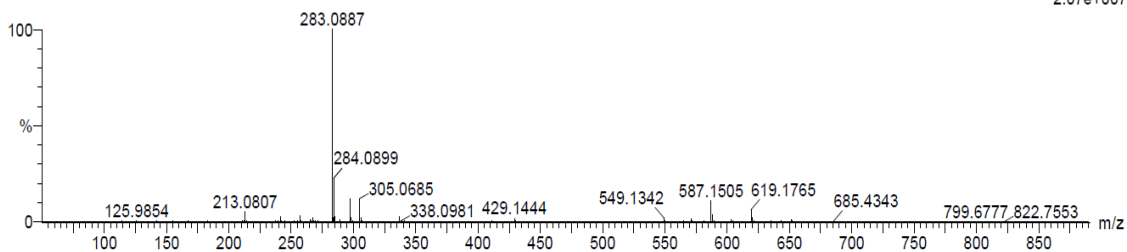

Minimum: -1.5  
Maximum: 2.0 50.0 50.0

| Mass     | Calc. Mass | mDa | PPM | DBE  | i-FIT  | Norm | Conf(%) | Formula         |
|----------|------------|-----|-----|------|--------|------|---------|-----------------|
| 283.0887 | 283.0883   | 0.4 | 1.4 | 11.5 | 1274.1 | n/a  | n/a     | C16 H12 N2 O2 F |

### <sup>1</sup>H NMR (400 MHz, CDCl<sub>3</sub>) of 5q

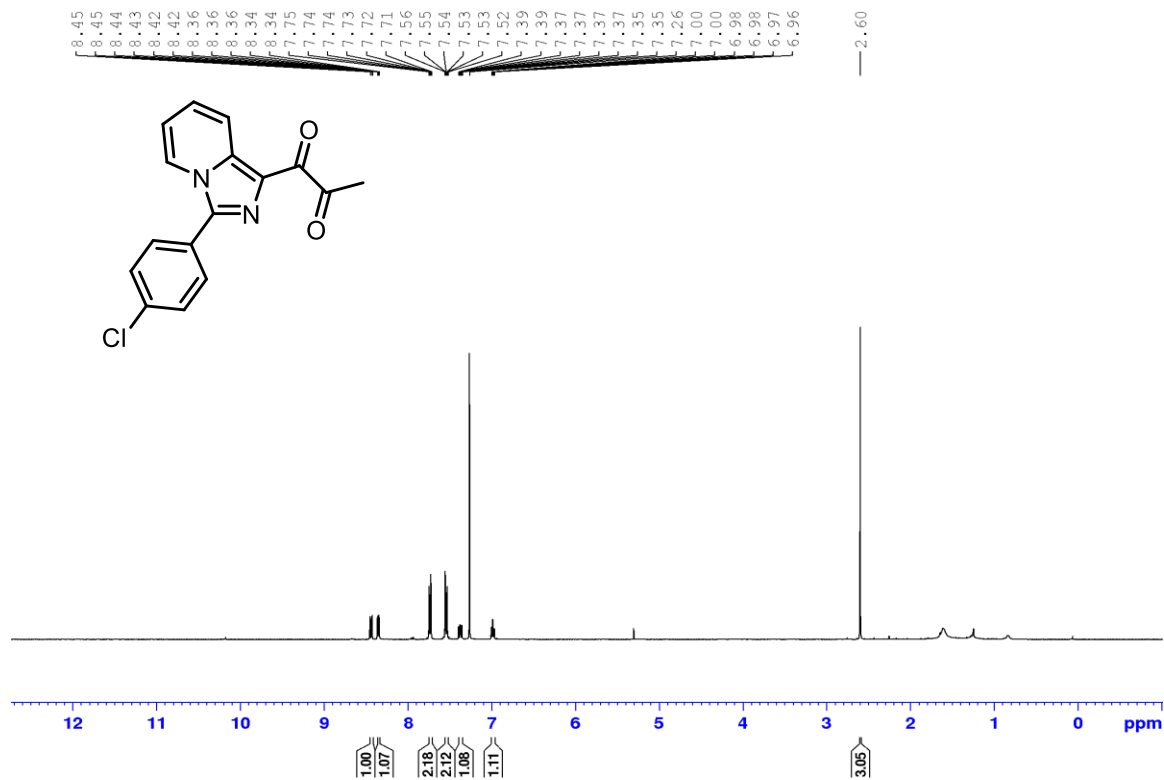

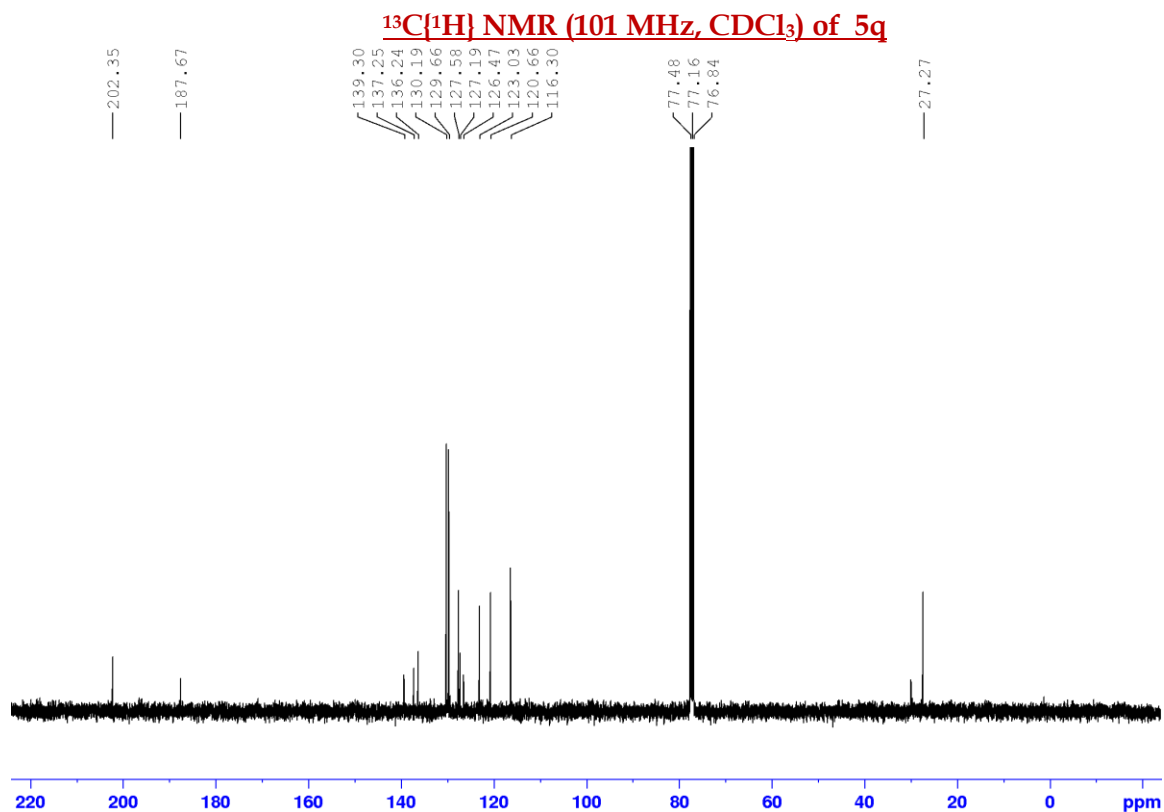

**HRMS of 5q**

**Elemental Composition Report**

Page 1

**Single Mass Analysis**

Tolerance = 50.0 PPM / DBE: min = -1.5, max = 50.0  
 Element prediction: Off  
 Number of isotope peaks used for i-FIT = 3

Monoisotopic Mass, Even Electron Ions  
 22 formula(e) evaluated with 1 results within limits (up to 3 closest results for each mass)

Elements Used:

C: 0-16 H: 0-100 N: 0-2 O: 0-2 Cl: 0-1

SM-385

QMI DIVISION, CSIR-IIIM JAMMU  
 Xevo G2-XS QTOF YFC2015

30-Apr-2024

11:45:10

1: TOF MS ES+

4.69e+006

300424\_04 7 (0.155) Cm (7:8)

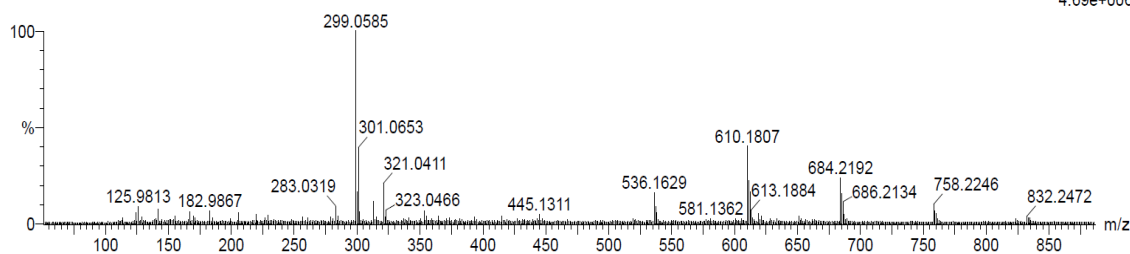

Minimum: -1.5  
 Maximum: 2.0 50.0 50.0

| Mass     | Calc. Mass | mDa  | PPM  | DBE  | i-FIT | Norm | Conf (%) | Formula          |
|----------|------------|------|------|------|-------|------|----------|------------------|
| 299.0585 | 299.0587   | -0.2 | -0.7 | 11.5 | 54.8  | n/a  | n/a      | C16 H12 N2 O2 Cl |

**<sup>1</sup>H NMR (400 MHz, CDCl<sub>3</sub>) of 5r**

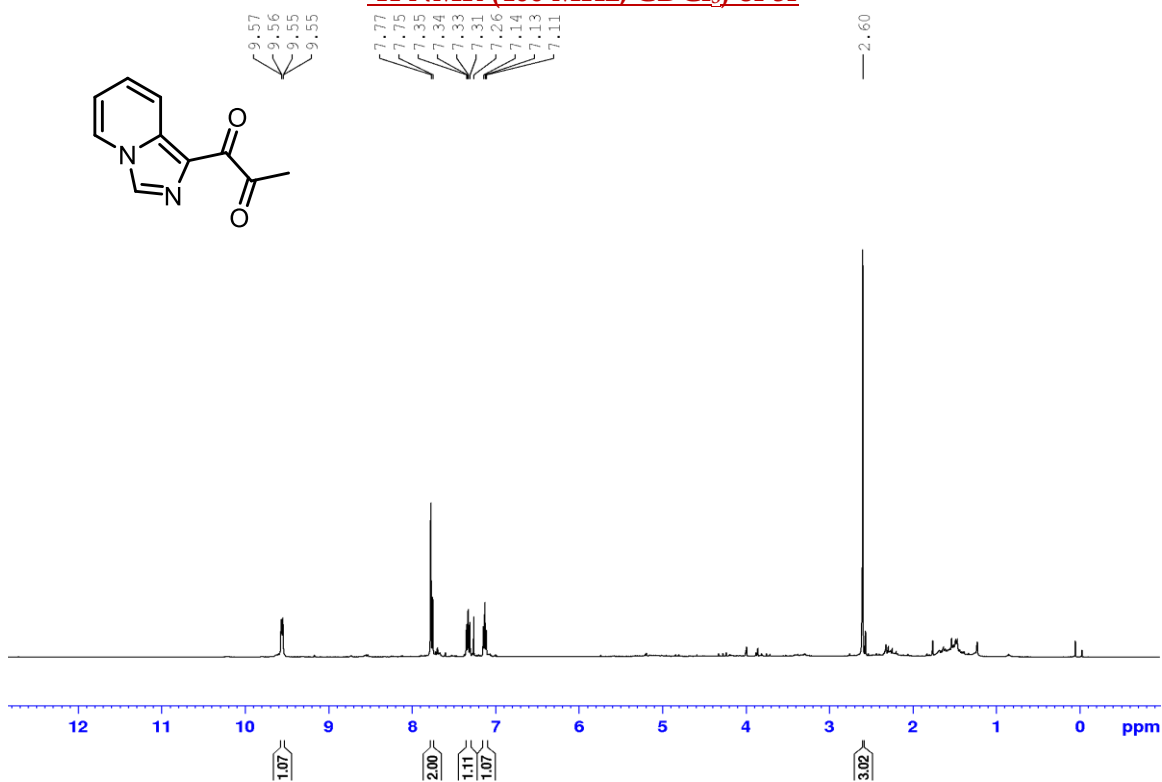

**<sup>13</sup>C[<sup>1</sup>H] NMR (101 MHz, CDCl<sub>3</sub>) of 5r**

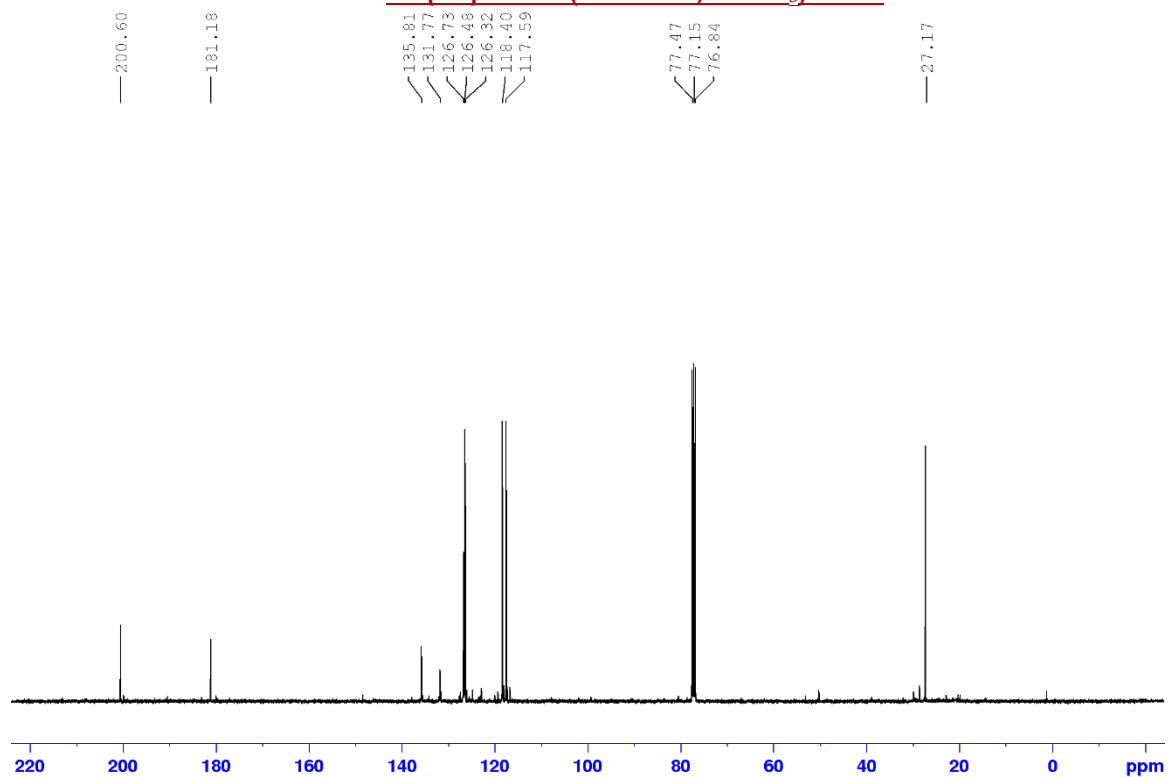

## HRMS of 5r

### Elemental Composition Report

Page 1

### Single Mass Analysis

Tolerance = 50.0 PPM / DBE: min = -1.5, max = 50.0

Element prediction: Off

Number of isotope peaks used for i-FIT = 3

Monoisotopic Mass, Even Electron Ions

10 formula(e) evaluated with 1 results within limits (up to 3 closest results for each mass)

Elements Used:

C: 0-10 H: 0-100 N: 0-2 O: 0-2

SM-521

QMI DIVISION, CSIR-IIIM JAMMU  
Xevo G2-XS QTOF YFC2015

07-May-2024

14:41:43

1: TOF MS ES+

6.87e+006

070524\_40 6 (0.138) Cm (5:7)

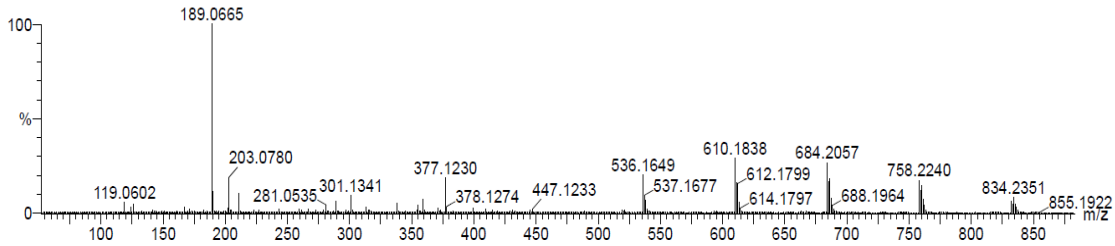

Minimum: -1.5  
Maximum: 2.0 50.0 50.0

| Mass     | Calc. Mass | mDa | PPM | DBE | i-FIT | Norm | Conf (%) | Formula      |
|----------|------------|-----|-----|-----|-------|------|----------|--------------|
| 189.0665 | 189.0664   | 0.1 | 0.5 | 7.5 | 27.7  | n/a  | n/a      | C10 H9 N2 O2 |

## <sup>1</sup>H NMR (400 MHz, DMSO-d<sub>6</sub>) of 6a

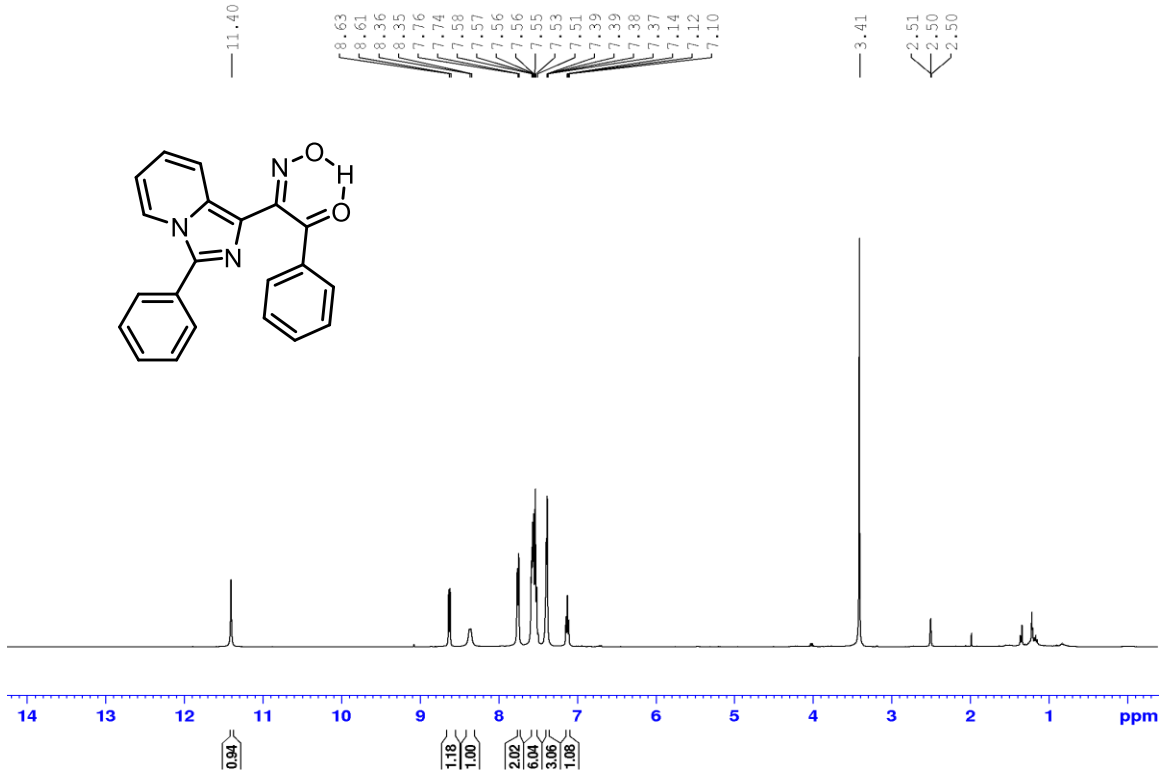

### <sup>13</sup>C[<sup>1</sup>H] NMR (101 MHz, DMSO-d<sub>6</sub>) of 6a

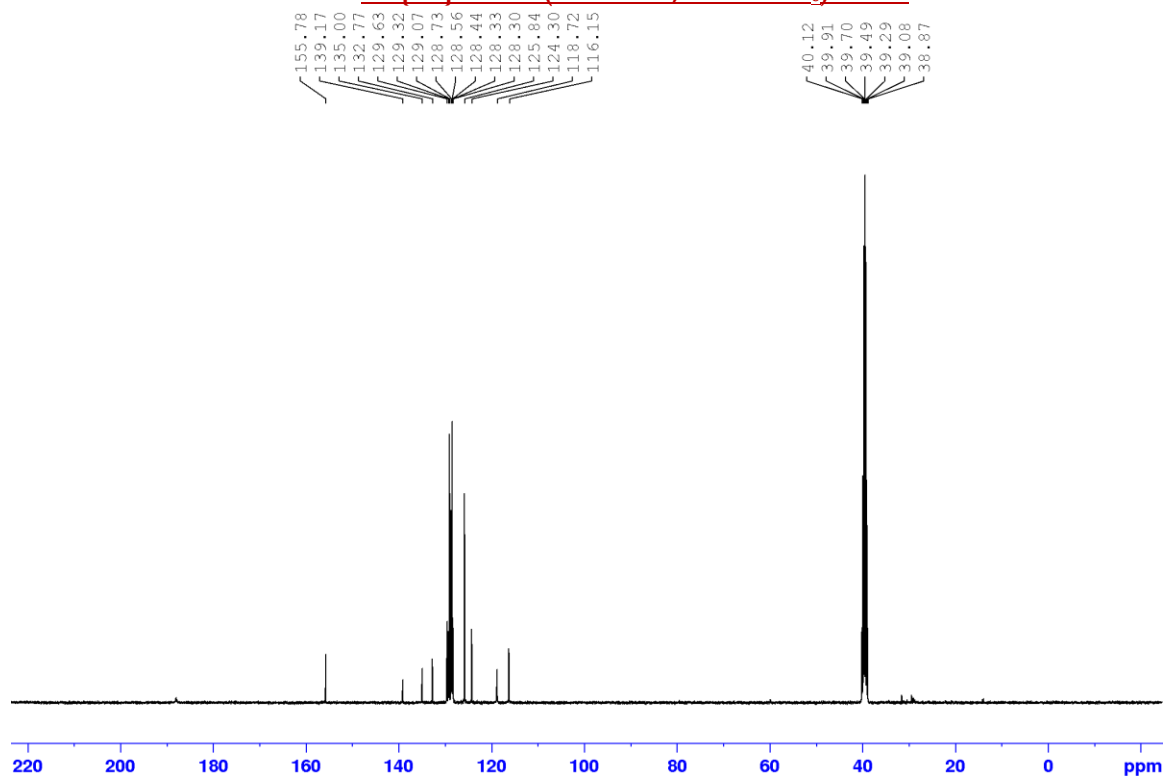

### HRMS of 6a

#### Elemental Composition Report

Page 1

#### Single Mass Analysis

Tolerance = 50.0 PPM / DBE: min = -1.5, max = 50.0

Element prediction: Off

Number of isotope peaks used for i-FIT = 3

Monoisotopic Mass, Even Electron Ions

16 formula(e) evaluated with 1 results within limits (up to 3 closest results for each mass)

Elements Used:

C: 0-21 H: 0-100 N: 0-3 O: 0-2

SM-Ph-OX

QMI DIVISION, CSIR-IIIM JAMMU  
Xevo G2-XS QTOF YFC2015

19-Mar-2024

14:10:43

1: TOF MS ES+

2.68e+007

190324\_17 8 (0.172)

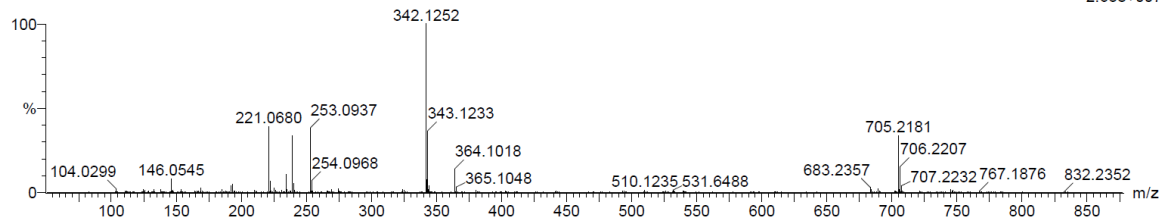

Minimum: -1.5  
Maximum: 50.0

| Mass     | Calc. Mass | mDa | PPM | DBE  | i-FIT  | Norm | Conf (%) | Formula       |
|----------|------------|-----|-----|------|--------|------|----------|---------------|
| 342.1252 | 342.1243   | 0.9 | 2.6 | 15.5 | 1205.1 | n/a  | n/a      | C21 H16 N3 O2 |



**<sup>1</sup>H NMR (400 MHz, DMSO-d<sub>6</sub>) of 6b**

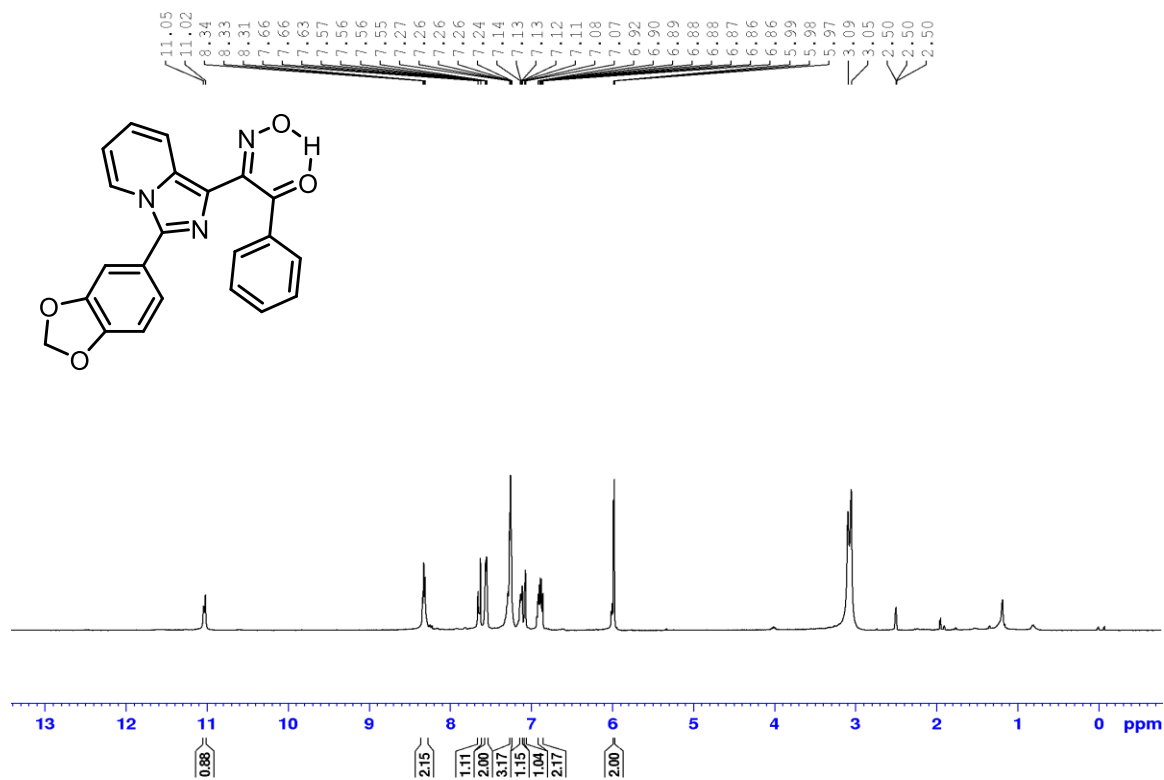

**<sup>13</sup>C{<sup>1</sup>H} NMR (101 MHz, DMSO-d<sub>6</sub>) of 6b**

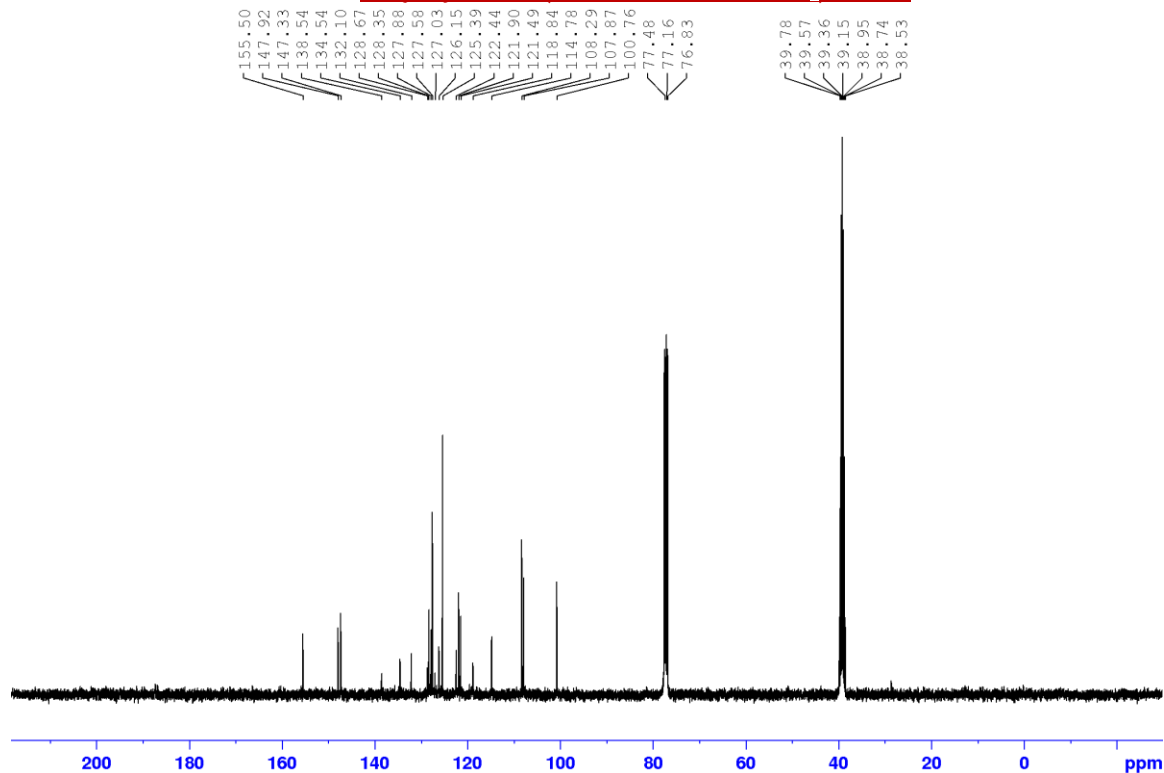

# HRMS of 6b

## Elemental Composition Report

### Single Mass Analysis

Tolerance = 50.0 PPM / DBE: min = -1.5, max = 50.0  
Element prediction: Off  
Number of isotope peaks used for i-FIT = 3

Monoisotopic Mass, Even Electron Ions  
26 formula(e) evaluated with 1 results within limits (up to 3 closest results for each mass)  
Elements Used:  
C: 0-22 H: 0-100 N: 0-3 O: 0-4  
SM-528

QMI DIVISION, CSIR-IIIM JAMMU  
Xevo G2-XS QTOF YFC2015

17-May-2024  
13:41:34  
1: TOF MS ES+  
4.08e+007

170524\_02 6 (0.138)

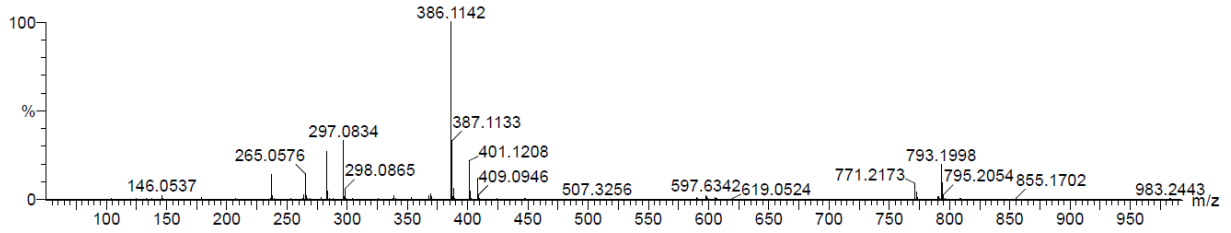

Minimum: -1.5  
Maximum: 50.0

| Mass     | Calc. Mass | mDa | PPM | DBE  | i-FIT  | Norm | Conf (%) | Formula       |
|----------|------------|-----|-----|------|--------|------|----------|---------------|
| 386.1142 | 386.1141   | 0.1 | 0.3 | 16.5 | 1030.3 | n/a  | n/a      | C22 H16 N3 O4 |
